# Supplementary material for: Three-Dimensional Heart Model-Based Screening of Proarrhythmic Potential by in silico Simulation of Action Potential and Electrocardiograms
Source: Front Physiol. 2019 Sep 4;10:1139. doi: 10.3389/fphys.2019.01139 (PMC6738014; doi:10.3389/fphys.2019.01139)
Supplement: Supplementary file 1 [file Table_1.xlsx]

## Sheet: SingleCellModel
Table S1. Action potentials of endocardial (Endo), M, and epicardial (Epi) cells for dofetilide, ranolazine, and verapamil.
Dofetilide 1xCmax												Dofetilide 5xCmax												Dofetilide 10xCmax												Ranolazine 1xCmax												Ranolazine 5xCmax
	Time (ms)	Voltage (mV)			Time (ms)	Voltage (mV)			Time (ms)	Voltage (mV)			Time (ms)	Voltage (mV)			Time (ms)	Voltage (mV)			Time (ms)	Voltage (mV)			Time (ms)	Voltage (mV)			Time (ms)	Voltage (mV)			Time (ms)	Voltage (mV)			Time (ms)	Voltage (mV)			Time (ms)	Voltage (mV)			Time (ms)	Voltage (mV)			Time (ms)
Endo	0	-87.933		M	0	-87.5412		Epi	0	-87.7944		Endo	0.021136	-85.9398		M	-198.031	-22.446		Epi	0.0138362	-86.5857		Endo	0.0128603	-86.7419		M	-197.612	-20.8911		Epi	0.00272624	-87.3879		Endo	0	-87.9439		M	0	-87.5474		Epi	0	-87.824		Endo	0
	0.00758039	-87.1335			0.00131575	-87.1415			0	-87.7944			0.071136	-81.9655			-188.031	-21.663			0.0638362	-82.6112			0.0628603	-82.7633			-187.612	-19.5314			0.0527262	-83.4075			0.048414	-83.9579			0.0389069	-84.3589			0.0461648	-83.8408			0.0368289
	0.0575804	-83.1526			0.0513158	-83.1624			0.0983902	-79.8521			0.121136	-78.005			-178.031	-20.092			0.113836	-78.656			0.11286	-78.8008			-177.612	-17.1351			0.102726	-79.4496			0.098414	-79.9928			0.0889069	-80.3988			0.0961648	-79.8825			0.0868289
	0.10758	-79.1896			0.101316	-79.2074			0.14839	-75.903			0.171136	-74.0478			-168.031	-17.2457			0.163836	-74.707			0.16286	-74.8434			-167.612	-12.9781			0.152726	-75.5			0.148414	-76.0362			0.138907	-76.4519			0.146165	-75.9345			0.136829
	0.15758	-75.2327			0.151316	-75.2613			0.19839	-71.9542			0.221136	-70.0878			-158.031	-11.6637			0.213836	-70.7561			0.21286	-70.8841			-160.695	-7.85916			0.202726	-71.5496			0.198414	-72.0799			0.188907	-72.5069			0.196165	-71.9871			0.186829
	0.20758	-71.2748			0.201316	-71.3145			0.24839	-68.0003			0.271136	-66.1218			-154.986	-8.64169			0.263836	-66.7987			0.26286	-66.9191			-158.4	-5.22687			0.252726	-67.5934			0.248414	-68.1196			0.238907	-68.5574			0.246165	-68.035			0.236829
	0.25758	-67.3118			0.251316	-67.3618			0.29839	-64.0387			0.321136	-62.1481			-152.713	-5.36105			0.313836	-62.833			0.31286	-62.9467			-156.105	-1.85035			0.302726	-63.6291			0.298414	-64.1527			0.288907	-64.6003			0.296165	-64.0757			0.286829
	0.30758	-63.3417			0.301316	-63.4007			0.34839	-60.0682			0.371136	-58.1654			-150.44	-0.772222			0.363836	-58.8577			0.36286	-58.9655			-153.81	2.18393			0.352726	-59.6553			0.348414	-60.1782			0.338907	-60.6341			0.346165	-60.1079			0.336829
	0.35758	-59.3634			0.351316	-59.4299			0.39839	-56.0867			0.421136	-54.17			-148.167	4.90041			0.413836	-54.8699			0.41286	-54.9727			-151.516	6.34577			0.402726	-55.6698			0.398414	-56.1939			0.388907	-56.6573			0.396165	-56.1294			0.386829
	0.40758	-55.374			0.401316	-55.4472			0.44839	-52.0883			0.471136	-50.1516			-145.894	10.324			0.463836	-50.8616			0.46286	-50.9599			-149.221	10.0601			0.452726	-51.6662			0.448414	-52.1937			0.438907	-52.6652			0.446165	-52.1347			0.436829
	0.45758	-51.3663			0.451316	-51.4461			0.49839	-48.4561			0.521136	-48.4829			-143.621	14.6533			0.513836	-48.4099			0.51286	-48.5041			-146.926	13.1186			0.502726	-48.4256			0.498414	-48.5606			0.488907	-48.644			0.496165	-48.507			0.486829
	0.50758	-48.5189			0.501316	-48.2075			0.54839	-48.3549			0.571136	-48.3273			-141.349	17.9166			0.563836	-48.2783			0.56286	-48.3682			-144.631	15.5584			0.552726	-48.3122			0.548414	-48.4589			0.538907	-48.1611			0.546165	-48.4115			0.536829
	0.55758	-48.3948			0.551316	-48.0955			0.59839	-48.1534			0.621136	-48.0569			-139.076	20.3531			0.613836	-48.0379			0.61286	-48.1231			-138.177	19.9746			0.602726	-48.0957			0.598414	-48.2571			0.588907	-47.9833			0.596165	-48.2173			0.586829
	0.60758	-48.164			0.601316	-47.8795			0.64839	-47.8266			0.671136	-47.6481			-131.863	24.6719			0.663836	-47.6646			0.66286	-47.7446			-128.717	22.5231			0.652726	-47.7513			0.648414	-47.9302			0.638907	-47.6849			0.646165	-47.8999			0.636829
	0.65758	-47.8018			0.651316	-47.5346			0.69839	-47.3529			0.721136	-47.079			-122.131	26.2131			0.713836	-47.137			0.71286	-47.2108			-118.717	22.7572			0.702726	-47.2575			0.698414	-47.4564			0.688907	-47.2439			0.696165	-47.4384			0.686829
	0.70758	-47.2865			0.701316	-47.0393			0.74839	-46.7111			0.771136	-46.3269			-112.131	25.6432			0.763836	-46.4333			0.76286	-46.4995			-108.717	21.8018			0.752726	-46.5927			0.748414	-46.8148			0.738907	-46.6399			0.746165	-46.8125			0.736829
	0.75758	-46.5961			0.751316	-46.3726			0.79839	-45.8776			0.821136	-45.3634			-102.131	24.1451			0.813836	-45.5278			0.81286	-45.5841			-98.7169	20.2557			0.802726	-45.7326			0.798414	-45.9813			0.788907	-45.8507			0.796165	-45.9995			0.786829
	0.80758	-45.7047			0.801316	-45.5102			0.84839	-44.8216			0.871136	-44.1498			-92.1308	22.2284			0.863836	-44.3856			0.86286	-44.4287			-88.7169	18.4002			0.852726	-44.6449			0.848414	-44.925			0.838907	-44.8482			0.846165	-44.9702			0.836829
	0.85758	-44.5778			0.851316	-44.4203			0.89839	-43.4992			0.921136	-42.6291			-82.1308	20.1141			0.913836	-42.9566			0.91286	-42.9813			-78.7169	16.3716			0.902726	-43.2835			0.898414	-43.6015			0.888907	-43.5932			0.896165	-43.6833			0.886829
	0.90758	-43.1656			0.901316	-43.0576			0.94839	-41.8454			0.971136	-40.7145			-72.1308	17.8987			0.963836	-41.165			0.96286	-41.163			-68.7169	14.2356			0.952726	-41.5795			0.948414	-41.9451			0.938907	-42.0283			0.946165	-42.0774			0.936829
	0.95758	-41.393			0.951316	-41.3547			0.99839	-39.7599			1.02114	-38.2694			-62.1308	15.6211			1.01384	-38.893			1.01286	-38.8507			-58.7169	12.0226			1.00273	-39.4265			0.998414	-39.8539			0.988907	-40.0661			0.996165	-40.0587			0.986829
	1.00758	-39.1428			1.00132	-39.2079			1.04839	-37.084			1.07114	-35.0731			-52.1308	13.2931			1.06384	-35.9531			1.06286	-35.8468			-48.7169	9.7448			1.05273	-36.6557			1.04841	-37.1665			1.03891	-37.5706			1.04617	-37.4794			1.03683
	1.05758	-36.2276			1.05132	-36.4543			1.09839	-33.5623			1.12114	-30.7651			-42.1308	10.9136			1.11384	-32.0413			1.11286	-31.8286			-38.7169	7.40448			1.10273	-32.995			1.09841	-33.621			1.08891	-34.3262			1.09617	-34.1024			1.08683
	1.10758	-32.3417			1.10132	-32.8344			1.14839	-28.7832			1.17114	-24.7739			-32.1308	8.47553			1.16384	-26.674			1.16286	-26.2781			-28.7169	4.9979			1.15273	-28.0072			1.14841	-28.7925			1.13891	-29.9907			1.14617	-29.5458			1.13683
	1.15758	-26.992			1.15132	-27.9394			1.19839	-22.1291			1.22114	-16.3401			-22.1308	5.96765			1.21384	-19.1693			1.21286	-18.4635			-18.7169	2.51716			1.20273	-21.05			1.19841	-22.0364			1.18891	-24.0497			1.19616	-23.2287			1.18683
	1.20758	-19.4649			1.20132	-21.185			1.24839	-12.9137			1.27114	-5.03461			-12.1308	3.37564			1.26384	-8.95069			1.26286	-7.79239			-8.7169	-0.0467902			1.25273	-11.4666			1.24841	-12.6261			1.23891	-15.885			1.24616	-14.4608			1.23683
	1.25758	-9.11278			1.25132	-12.0002			1.29839	-1.16842			1.32114	7.77744			-2.1308	0.683244			1.31384	3.341			1.31286	4.92295			-1.7019	-1.897			1.30273	0.509731			1.29841	-0.589146			1.28891	-5.28751			1.29617	-3.09504			1.28683
	1.30758	3.4886			1.30132	-0.623197			1.34839	10.9456			1.37114	18.3416			-1.0858	0.395668			1.36384	14.7014			1.36286	16.3132			-1.6519	-1.91021			1.35273	12.3942			1.34841	11.7673			1.33891	6.40358			1.34617	9.09859			1.33683
	1.35758	15.2115			1.35132	10.759			1.39839	19.8375			1.42114	24.2851			-1.0358	0.382025			1.41384	21.9987			1.41286	23.2741			-1.6019	-1.92342			1.40273	20.6988			1.39841	20.6706			1.38891	16.0998			1.39617	18.5789			1.38683
	1.40758	22.6808			1.40132	19.0086			1.44839	24.468			1.47114	26.9131			-0.9858	0.368376			1.46384	25.4779			1.46286	26.4566			-1.5519	-1.93664			1.45273	24.8735			1.44841	25.1851			1.43891	21.8763			1.44616	23.7677			1.43683
	1.45758	26.1714			1.45132	23.4003			1.49839	26.5226			1.52114	28.1313			-0.9358	0.354721			1.51384	27.0324			1.51286	27.8798			-1.5019	-1.94986			1.50273	26.7232			1.49841	27.1588			1.48891	24.6487			1.49616	26.1011			1.48683
	1.50758	27.7139			1.50132	25.4451			1.54839	27.5382			1.57114	28.8764			-0.8858	0.341059			1.56384	27.8743			1.56286	28.6905			-1.4519	-1.96309			1.55273	27.6671			1.54841	28.1504			1.53891	25.995			1.54617	27.2189			1.53683
	1.55758	28.5627			1.55132	26.5064			1.59839	28.1988			1.62114	29.469			-0.8358	0.327392			1.61384	28.4777			1.61286	29.3048			-1.4019	-1.97632			1.60273	28.3046			1.59841	28.8189			1.58891	26.8071			1.59617	27.9114			1.58683
	1.60758	29.1882			1.60132	27.2199			1.64839	28.737			1.67114	30.0037			-0.7858	0.313719			1.66384	28.9948			1.66286	29.8489			-1.3519	-1.98956			1.65273	28.8351			1.64841	29.3791			1.63891	27.4354			1.64617	28.4582			1.63683
	1.65758	29.7355			1.65132	27.8144			1.69839	29.2234			1.72114	30.507			-0.7358	0.300041			1.71384	29.4707			1.71286	30.3582			-1.3019	-2.0028			1.70273	29.3185			1.69841	29.8938			1.68891	27.9972			1.69616	28.9462			1.68683
	1.70758	30.2457			1.70132	28.3631			1.74839	29.6784			1.77114	30.9862			-0.6858	0.286357			1.76384	29.9184			1.76286	30.8425			-1.2519	-2.01604			1.75273	29.7721			1.74841	30.3805			1.73891	28.5285			1.74616	29.401			1.73683
	1.75758	30.7301			1.75132	28.8875			1.79839	30.1081			1.82114	31.4436			-0.6358	0.272668			1.81384	30.3416			1.81286	31.3048			-1.2019	-2.02929			1.80273	30.2008			1.79841	30.8444			1.78891	29.0396			1.79617	29.83			1.78683
	1.80758	31.1922			1.80132	29.3936			1.84839	30.5144			1.87114	31.8803			-0.5858	0.258974			1.86384	30.7419			1.86286	31.7463			-1.1519	-2.04254			1.85273	30.6066			1.84841	31.2871			1.83891	29.5332			1.84617	30.2356			1.83683
	1.85758	31.6333			1.85132	29.8826			1.89839	30.8984			1.92114	32.2972			-0.5358	0.245275			1.91384	31.1202			1.91286	32.168			-1.1019	-2.0558			1.90273	30.9903			1.89841	31.7097			1.88891	30.0097			1.89617	30.6191			1.88683
	1.90758	32.0544			1.90132	30.355			1.94839	31.2609			1.97114	32.695			0.0173289	1.69321			1.96384	31.4773			1.96286	32.5705			-1.0519	-2.06906			1.95273	31.3528			1.94841	32.1129			1.93891	30.4693			1.94616	30.9812			1.93683
	1.95758	32.4562			1.95132	30.8106			1.99839	31.6028			2.02114	33.0746			0.0673289	5.67737			2.01384	31.814			2.01286	32.9547			-1.0019	-2.08233			2.00273	31.6949			1.99841	32.4976			1.98891	30.9119			1.99616	31.3227			1.98683
	2.00758	32.8395			2.00132	31.2494			2.04839	31.9248			2.07114	33.4367			0.117329	9.65882			2.06384	32.1311			2.06286	33.3213			-0.9519	-2.09559			2.05273	32.0173			2.04841	32.8644			2.03891	31.3375			2.04616	31.6444			2.03683
	2.05758	33.2051			2.05132	31.6716			2.09839	32.2278			2.12114	33.782			0.167329	13.6372			2.11384	32.4294			2.11286	33.671			-0.9019	-2.10887			2.10273	32.3209			2.09841	33.2142			2.08891	31.7464			2.09617	31.9471			2.08683
	2.10758	33.5537			2.10132	32.0771			2.14839	32.5125			2.17114	34.1113			0.217329	17.6121			2.16384	32.7098			2.16286	34.0046			-0.8519	-2.12214			2.15273	32.6064			2.14841	33.5476			2.13891	32.1384			2.14616	32.2315			2.13683
	2.15758	33.8861			2.15132	32.4661			2.19839	32.7798			2.22114	34.4254			0.267329	21.5831			2.21384	32.973			2.21286	34.3229			-0.8019	-2.13542			2.20273	32.8746			2.19841	33.8654			2.18891	32.5139			2.19617	32.4985			2.18683
	2.20758	34.2031			2.20132	32.8387			2.24839	33.0304			2.27114	34.7249			0.317329	25.5498			2.26384	33.2198			2.26286	34.6264			-0.7519	-2.1487			2.25273	33.1263			2.24841	34.1684			2.23891	32.8729			2.24616	32.7489			2.23683
	2.25758	34.5052			2.25132	33.1951			2.29839	33.265			2.32114	35.0105			0.367329	29.5119			2.31384	33.451			2.31286	34.9159			-0.7019	-2.16199			2.30273	33.3624			2.29841	34.4571			2.28891	33.2157			2.29616	32.9833			2.28683
	2.30758	34.7933			2.30132	33.5354			2.34839	33.4845			2.37114	35.2829			0.417329	33.4693			2.36384	33.6673			2.36286	35.1921			-0.6519	-2.17527			2.35273	33.5834			2.34841	34.7322			2.33891	33.5424			2.34617	33.2025			2.33683
	2.35758	35.068			2.35132	33.8598			2.39839	33.6896			2.42114	35.5427			0.467329	37.4216			2.41384	33.8693			2.41286	35.4556			-0.6019	-2.18856			2.40273	33.7901			2.39841	34.9945			2.38891	33.8533			2.39616	33.4072			2.38683
	2.40758	35.33			2.40132	34.1684			2.44839	33.8808			2.47114	35.7906			0.517329	39.3694			2.46384	34.0578			2.46286	35.707			-0.5519	-2.20186			2.45273	33.9831			2.44841	35.2445			2.43891	34.1485			2.44617	33.598			2.43683
	2.45758	35.5799			2.45132	34.4615			2.49839	34.0589			2.52114	36.0272			0.567329	39.3165			2.51384	34.2334			2.51286	35.947			-0.5019	-2.21516			2.50273	34.1631			2.49841	35.4829			2.48891	34.4282			2.49616	33.7757			2.48683
	2.50758	35.8182			2.50132	34.7392			2.54839	34.2245			2.57114	36.253			0.617329	39.2637			2.56384	34.3967			2.56286	36.176			-0.4519	-2.22845			2.55273	34.3307			2.54841	35.7101			2.53891	34.6926			2.54616	33.9408			2.53683
	2.55758	36.0456			2.55132	35.0016			2.59839	34.3781			2.62114	36.4685			0.667329	39.2109			2.61384	34.5482			2.61286	36.3947			0.0270881	0.043496			2.60273	34.4865			2.59841	35.9269			2.58891	34.9419			2.59617	34.0939			2.58683
	2.60758	36.2626			2.60132	35.249			2.64839	34.5203			2.67114	36.6743			0.717329	39.1583			2.66384	34.6885			2.66286	36.6036			0.0770881	4.02782			2.65273	34.631			2.64841	36.1335			2.63891	35.1763			2.64616	34.2355			2.63683
	2.65758	36.4697			2.65132	35.4813			2.69839	34.6516			2.72114	36.8709			0.767329	39.1057			2.71384	34.8181			2.71286	36.8031			0.127088	8.00972			2.70273	34.7646			2.69841	36.3307			2.68891	35.396			2.69617	34.3663			2.68683
	2.70758	36.6674			2.70132	35.6989			2.74839	34.7725			2.77114	37.0586			0.817329	39.0532			2.76384	34.9375			2.76286	36.9937			0.177088	11.9889			2.75273	34.888			2.74841	36.5187			2.73891	35.6011			2.74616	34.4867			2.73683
	2.75758	36.8561			2.75132	35.9017			2.79839	34.8836			2.82114	37.238			0.867329	39.0008			2.81384	35.0472			2.81286	37.1758			0.227088	15.9651			2.80273	35.0016			2.79841	36.6982			2.78891	35.7917			2.79616	34.5971			2.78683
	2.80758	37.0364			2.80132	36.0898			2.84839	34.9852			2.87114	37.4094			0.917329	38.9485			2.86384	35.1475			2.86286	37.3499			0.277088	19.9378			2.85273	35.1057			2.84841	36.8694			2.83891	35.9679			2.84617	34.6981			2.83683
	2.85758	37.2085			2.85132	36.2632			2.89839	35.0779			2.92114	37.5732			0.967329	38.8963			2.91384	35.2391			2.91286	37.5164			0.327088	23.9069			2.90273	35.201			2.89841	37.0327			2.88891	36.1298			2.89616	34.79			2.88683
	2.90758	37.373			2.90132	36.4219			2.94839	35.1619			2.97114	37.7298			1.01733	38.8441			2.96384	35.3221			2.96286	37.6755			0.377088	27.8719			2.95273	35.2876			2.94841	37.1887			2.93891	36.2775			2.94617	34.8734			2.93683
	2.95758	37.5301			2.95132	36.566			2.99839	35.2377			3.02114	37.8796			1.06733	38.792			3.01384	35.3971			3.01286	37.8277			0.427088	31.8327			3.00273	35.3661			2.99841	37.3375			2.98891	36.4109			2.99616	34.9485			2.98683
	3.00758	37.6802			3.00132	36.6952			3.04839	35.3057			3.07114	38.0228			1.11733	38.74			3.06384	35.4643			3.06286	37.9733			0.477088	35.789			3.05273	35.4368			3.04841	37.4796			3.03891	36.53			3.04616	35.0158			3.03683
	3.05758	37.8236			3.05132	36.8094			3.09839	35.3662			3.12114	38.1597			1.16733	38.688			3.11384	35.5242			3.11286	38.1127			0.527088	36.9418			3.10273	35.5001			3.09841	37.6152			3.08891	36.6347			3.09617	35.0756			3.08683
	3.10758	37.9606			3.10132	36.9084			3.14839	35.4196			3.17114	38.2907			1.21733	38.6361			3.16384	35.577			3.16286	38.246			0.577088	36.8944			3.15273	35.5562			3.14841	37.7447			3.13891	36.7249			3.14616	35.1282			3.13683
	3.15758	38.0916			3.15132	36.992			3.19839	35.4662			3.22114	38.416			1.26733	38.5843			3.21384	35.6231			3.21286	38.3736			0.627088	36.847			3.20273	35.6055			3.19841	37.8683			3.18891	36.8004			3.19617	35.1741			3.18683
	3.20758	38.2168			3.20132	37.0597			3.24839	35.5062			3.27114	38.5359			1.31733	38.5326			3.26384	35.6628			3.26286	38.4957			0.677088	36.7998			3.25273	35.6483			3.24841	37.9863			3.23891	36.8608			3.24616	35.2134			3.23683
	3.25758	38.3365			3.25132	37.1112			3.29839	35.54			3.32114	38.6506			1.36733	38.4809			3.31384	35.6962			3.31286	38.6127			0.727088	36.7526			3.30273	35.6848			3.29841	38.099			3.28891	36.906			3.29616	35.2465			3.28683
	3.30758	38.4509			3.30132	37.1459			3.34839	35.5679			3.37114	38.7604			1.41733	38.4293			3.36384	35.7238			3.36286	38.7246			0.777088	36.7055			3.35273	35.7154			3.34841	38.2065			3.33891	36.9355			3.34617	35.2738			3.33683
	3.35758	38.5603			3.35132	37.1632			3.39839	35.5901			3.42114	38.8655			1.46733	38.3778			3.41384	35.7458			3.41286	38.8318			0.827088	36.6585			3.40273	35.7403			3.39841	38.3092			3.38891	36.949			3.39616	35.2953			3.38683
	3.40758	38.6649			3.40132	37.1626			3.44839	35.6068			3.47114	38.966			1.51733	38.3263			3.46384	35.7624			3.46286	38.9345			0.877088	36.6115			3.45273	35.7598			3.44841	38.4073			3.43891	36.9459			3.44617	35.3115			3.43683
	3.45758	38.7648			3.45132	37.1434			3.49839	35.6184			3.52114	39.0622			1.56733	38.2749			3.51384	35.7738			3.51286	39.0328			0.927088	36.5647			3.50273	35.774			3.49841	38.5009			3.48891	36.9257			3.49616	35.3225			3.48683
	3.50758	38.8604			3.50132	37.1049			3.54839	35.625			3.57114	39.1544			1.61733	38.2236			3.56384	35.7803			3.56286	39.127			0.977088	36.5179			3.55273	35.7832			3.54841	38.5902			3.53891	36.8881			3.54616	35.3286			3.53683
	3.55758	38.9517			3.55132	37.0463			3.59839	35.6268			3.62114	39.2425			1.66733	38.1723			3.61384	35.7821			3.61286	39.2173			1.02709	36.4711			3.60273	35.7877			3.59841	38.6755			3.58891	36.8323			3.59617	35.33			3.58683
	3.60758	39.0391			3.60132	36.9671			3.64839	35.6241			3.67114	39.3269			1.71733	38.1211			3.66384	35.7793			3.66286	39.3037			1.07709	36.4245			3.65273	35.7875			3.64841	38.7569			3.63891	36.7581			3.64616	35.327			3.63683
	3.65758	39.1225			3.65132	36.8667			3.69839	35.617			3.72114	39.4077			1.76733	38.07			3.71384	35.7722			3.71286	39.3866			1.12709	36.3779			3.70273	35.783			3.69841	38.8345			3.68891	36.6649			3.69617	35.3197			3.68683
	3.70758	39.2023			3.70132	36.7448			3.74839	35.6058			3.77114	39.4851			1.81733	38.0189			3.76384	35.761			3.76286	39.4659			1.17709	36.3314			3.75273	35.7743			3.74841	38.9086			3.73891	36.5526			3.74616	35.3083			3.73683
	3.75758	39.2786			3.75132	36.6014			3.79839	35.5906			3.82114	39.5591			1.86733	37.9679			3.81384	35.7457			3.81286	39.542			1.22709	36.2849			3.80273	35.7615			3.79841	38.9793			3.78891	36.4212			3.79616	35.293			3.78683
	3.80758	39.3514			3.80132	36.4366			3.84839	35.5716			3.87114	39.63			1.91733	37.917			3.86384	35.7267			3.86286	39.6148			1.27709	36.2385			3.85273	35.7448			3.84841	39.0467			3.83891	36.2707			3.84617	35.2741			3.83683
	3.85758	39.4211			3.85132	36.251			3.89839	35.549			3.92114	39.6978			1.96733	37.8661			3.91384	35.7039			3.91286	39.6847			1.32709	36.1921			3.90273	35.7245			3.89841	39.111			3.88891	36.1016			3.89616	35.2516			3.88683
	3.90758	39.4876			3.90132	36.0455			3.94839	35.5229			3.97114	39.7627			2.01733	37.8153			3.96384	35.6777			3.96286	39.7516			1.37709	36.1459			3.95273	35.7006			3.94841	39.1722			3.93891	35.9146			3.94617	35.2257			3.93683
	3.95758	39.5511			3.95132	35.8215			3.99839	35.4934			4.02114	39.8248			2.06733	37.7646			4.01384	35.6481			4.01286	39.8157			1.42709	36.0996			4.00273	35.6732			3.99841	39.2306			3.98891	35.7107			3.99616	35.1967			3.98683
	4.00758	39.6118			4.00132	35.5805			4.04839	35.4608			4.07114	39.8843			2.11733	37.7139			4.06384	35.6152			4.06286	39.8771			1.47709	36.0535			4.05273	35.6426			4.04841	39.2863			4.03891	35.4912			4.04617	35.1646			4.03683
	4.05758	39.6698			4.05132	35.3245			4.09839	35.4251			4.12114	39.9412			2.16733	37.6633			4.11384	35.5792			4.11286	39.936			1.52709	36.0074			4.10273	35.6088			4.09841	39.3393			4.08891	35.2576			4.09617	35.1295			4.08683
	4.10758	39.7251			4.10132	35.0557			4.14839	35.3864			4.17114	39.9956			2.21733	37.6127			4.16384	35.5403			4.16286	39.9924			1.57709	35.9613			4.15273	35.572			4.14841	39.3897			4.13891	35.0115			4.14616	35.0917			4.13683
	4.15758	39.7779			4.15132	34.7761			4.19839	35.345			4.22114	40.0476			2.26733	37.5622			4.21384	35.4984			4.21286	40.0464			1.62709	35.9153			4.20273	35.5323			4.19841	39.4378			4.18891	34.7549			4.19616	35.0513			4.18683
	4.20758	39.8283			4.20132	34.4881			4.24839	35.3008			4.27114	40.0974			2.31733	37.5118			4.26384	35.4538			4.26286	40.0982			1.67709	35.8694			4.25273	35.4898			4.24841	39.4835			4.23891	34.4896			4.24617	35.0083			4.23683
	4.25758	39.8764			4.25132	34.194			4.29839	35.254			4.32114	40.1451			2.36733	37.4614			4.31384	35.4065			4.31286	40.1478			1.72709	35.8235			4.30273	35.4445			4.29841	39.5269			4.28891	34.2176			4.29617	34.9629			4.28683
	4.30758	39.9222			4.30132	33.8958			4.34839	35.2048			4.37114	40.1906			2.41733	37.4111			4.36384	35.3566			4.36286	40.1953			1.77709	35.7777			4.35273	35.3967			4.34841	39.5683			4.33891	33.9408			4.34617	34.9152			4.33683
	4.35758	39.9659			4.35132	33.5956			4.39839	35.1532			4.42114	40.2341			2.46733	37.3609			4.41384	35.3043			4.41286	40.2408			1.82709	35.7319			4.40273	35.3464			4.39841	39.6075			4.38891	33.661			4.39616	34.8654			4.38683
	4.40758	40.0075			4.40132	33.2952			4.44839	35.0993			4.47114	40.2757			2.51733	37.3107			4.46384	35.2496			4.46286	40.2844			1.87709	35.6862			4.45273	35.2936			4.44841	39.6448			4.43891	33.3799			4.44616	34.8134			4.43683
	4.45758	40.0472			4.45132	32.9963			4.49839	35.0432			4.52114	40.3155			2.56733	37.2605			4.51384	35.1925			4.51286	40.3261			1.92709	35.6405			4.50273	35.2386			4.49841	39.6802			4.48891	33.099			4.49617	34.7595			4.48683
	4.50758	40.0849			4.50132	32.7004			4.54839	34.9849			4.57114	40.3534			2.61733	37.2105			4.56384	35.1333			4.56286	40.3661			1.97709	35.5949			4.55273	35.1812			4.54841	39.7137			4.53891	32.8197			4.54617	34.7037			4.53683
	4.55758	40.1209			4.55132	32.4086			4.59839	34.9247			4.62114	40.3897			2.66733	37.1605			4.61384	35.0719			4.61286	40.4044			2.02709	35.5493			4.60273	35.1217			4.59841	39.7455			4.58891	32.5434			4.59617	34.6462			4.58683
	4.60758	40.155			4.60132	32.1222			4.64839	34.8625			4.67114	40.4243			2.71733	37.1105			4.66384	35.0084			4.66286	40.441			2.07709	35.5038			4.65273	35.0602			4.64841	39.7756			4.63891	32.2711			4.64616	34.5869			4.63683
	4.65758	40.1875			4.65132	31.8421			4.69839	34.7984			4.72114	40.4573			2.76733	37.0606			4.71384	34.9429			4.71286	40.476			2.12709	35.4584			4.70273	34.9965			4.69841	39.804			4.68891	32.0037			4.69616	34.526			4.68683
	4.70758	40.2184			4.70132	31.5689			4.74839	34.7326			4.77114	40.4888			2.81733	37.0108			4.76384	34.8755			4.76286	40.5095			2.17709	35.413			4.75273	34.931			4.74841	39.8309			4.73891	31.7421			4.74617	34.4635			4.73683
	4.75758	40.2477			4.75132	31.3033			4.79839	34.665			4.82114	40.5189			2.86733	36.9611			4.81384	34.8062			4.81286	40.5416			2.22709	35.3676			4.80273	34.8635			4.79841	39.8563			4.78891	31.4868			4.79617	34.3996			4.78683
	4.80758	40.2755			4.80132	31.0458			4.84839	34.5957			4.87114	40.5475			2.91733	36.9114			4.86384	34.7351			4.86286	40.5723			2.27709	35.3223			4.85273	34.7943			4.84841	39.8803			4.83891	31.2385			4.84617	34.3343			4.83683
	4.85758	40.3018			4.85132	30.7968			4.89839	34.5248			4.92114	40.5748			2.96733	36.8617			4.91384	34.6622			4.91286	40.6016			2.32709	35.2771			4.90273	34.7232			4.89841	39.9029			4.88891	30.9975			4.89616	34.2676			4.88683
	4.90758	40.3268			4.90132	30.5564			4.94839	34.4524			4.97114	40.6008			3.01733	36.8121			4.96384	34.5877			4.96286	40.6296			2.37709	35.2319			4.95273	34.6505			4.94841	39.9241			4.93891	30.7643			4.94616	34.1997			4.93683
	4.95758	40.3504			4.95132	30.3249			4.99839	34.3786			5.02114	40.6255			3.06733	36.7626			5.01384	34.5115			5.01286	40.6564			2.42709	35.1867			5.00273	34.5762			4.99841	39.9441			4.98891	30.5389			4.99617	34.1307			4.98683
	5.00758	40.3727			5.00132	30.1025			5.04839	34.3033			5.07114	40.6491			3.11733	36.7131			5.06384	34.4338			5.06286	40.682			2.47709	35.1416			5.05273	34.5002			5.04841	39.9628			5.03891	30.3217			5.04617	34.0605			5.03683
	5.05758	40.3938			5.05132	29.889			5.09839	34.2267			5.12114	40.6714			3.16733	36.6637			5.11384	34.3546			5.11286	40.7064			2.52709	35.0966			5.10273	34.4228			5.09841	39.9803			5.08891	30.1127			5.09617	33.9892			5.08683
	5.10758	40.4137			5.10132	29.6846			5.14839	34.1488			5.17114	40.6927			3.21733	36.6144			5.16384	34.2739			5.16286	40.7298			2.57709	35.0516			5.15273	34.3439			5.14841	39.9967			5.13891	29.912			5.14616	33.917			5.13683
	5.15758	40.4324			5.15132	29.4891			5.19839	34.0697			5.22114	40.7128			3.26733	36.5651			5.21384	34.1919			5.21286	40.752			2.62709	35.0066			5.20273	34.2636			5.19841	40.012			5.18891	29.7195			5.19616	33.8438			5.18683
	5.20758	40.45			5.20132	29.3025			5.24839	33.9894			5.27114	40.732			3.31733	36.5159			5.26384	34.1085			5.26286	40.7732			2.67709	34.9617			5.25273	34.182			5.24841	40.0262			5.23891	29.5352			5.24617	33.7697			5.23683
	5.25758	40.4666			5.25132	29.1246			5.29839	33.908			5.32114	40.7501			3.36733	36.4667			5.31384	34.0239			5.31286	40.7934			2.72709	34.9169			5.30273	34.0991			5.29841	40.0394			5.28891	29.3591			5.29617	33.6948			5.28683
	5.30758	40.4821			5.30132	28.9553			5.34839	33.8256			5.37114	40.7672			3.41733	36.4176			5.36384	33.9381			5.36286	40.8127			2.77709	34.8721			5.35273	34.015			5.34841	40.0516			5.33891	29.191			5.34617	33.6191			5.33683
	5.35758	40.4966			5.35132	28.7944			5.39839	33.7421			5.42114	40.7835			3.46733	36.3686			5.41384	33.8512			5.41286	40.831			2.82709	34.8273			5.40273	33.9298			5.39841	40.0629			5.38891	29.0308			5.39616	33.5427			5.38683
	5.40758	40.5102			5.40132	28.6417			5.44839	33.6578			5.47114	40.7988			3.51733	36.3196			5.46384	33.7633			5.46286	40.8485			2.87709	34.7826			5.45273	33.8435			5.44841	40.0732			5.43891	28.8784			5.44616	33.4656			5.43683
	5.45758	40.5228			5.45132	28.4971			5.49839	33.5726			5.52114	40.8133			3.56733	36.2706			5.51384	33.6743			5.51286	40.8651			2.92709	34.738			5.50273	33.7562			5.49841	40.0827			5.48891	28.7336			5.49617	33.3879			5.48683
	5.50758	40.5346			5.50132	28.3603			5.54839	33.4866			5.57114	40.8269			3.61733	36.2217			5.56384	33.5845			5.56286	40.8809			2.97709	34.6934			5.55273	33.668			5.54841	40.0913			5.53891	28.5963			5.54617	33.3097			5.53683
	5.55758	40.5455			5.55132	28.2311			5.59839	33.3999			5.62114	40.8398			3.66733	36.1729			5.61384	33.4938			5.61286	40.8959			3.02709	34.6488			5.60273	33.5789			5.59841	40.0991			5.58891	28.4661			5.59617	33.2309			5.58683
	5.60758	40.5555			5.60132	28.1093			5.64839	33.3125			5.67114	40.8518			3.71733	36.1242			5.66384	33.4024			5.66286	40.9101			3.07709	34.6043			5.65273	33.4891			5.64841	40.1061			5.63891	28.3431			5.64616	33.1517			5.63683
	5.65758	40.5648			5.65132	27.9947			5.69839	33.2246			5.72114	40.8631			3.76733	36.0755			5.71384	33.3103			5.71286	40.9236			3.12709	34.5599			5.70273	33.3985			5.69841	40.1124			5.68891	28.227			5.69616	33.0721			5.68683
	5.70758	40.5733			5.70132	27.8871			5.74839	33.1361			5.77114	40.8737			3.81733	36.0268			5.76384	33.2176			5.76286	40.9363			3.17709	34.5155			5.75273	33.3074			5.74841	40.1179			5.73891	28.1175			5.74617	32.9921			5.73683
	5.75758	40.581			5.75132	27.7862			5.79839	33.0472			5.82114	40.8837			3.86733	35.9782			5.81384	33.1244			5.81286	40.9484			3.22709	34.4711			5.80273	33.2157			5.79841	40.1227			5.78891	28.0145			5.79617	32.9118			5.78683
	5.80758	40.5881			5.80132	27.6919			5.84839	32.9578			5.87114	40.8929			3.91733	35.9297			5.86384	33.0308			5.86286	40.9598			3.27709	34.4268			5.85273	33.1235			5.84841	40.1268			5.83891	27.9179			5.84617	32.8313			5.83683
	5.85758	40.5944			5.85132	27.6039			5.89839	32.8682			5.92114	40.9015			3.96733	35.8812			5.91384	32.9368			5.91286	40.9706			3.32709	34.3825			5.90273	33.031			5.89841	40.1303			5.88891	27.8274			5.89616	32.7506			5.88683
	5.90758	40.6001			5.90132	27.5221			5.94839	32.7783			5.97114	40.9095			4.01733	35.8328			5.96384	32.8426			5.96286	40.9808			3.37709	34.3383			5.95273	32.9381			5.94841	40.1332			5.93891	27.7428			5.94616	32.6697			5.93683
	5.95758	40.6051			5.95132	27.4462			5.99839	32.6883			6.02114	40.9168			4.06733	35.7844			6.01384	32.7483			6.01286	40.9904			3.42709	34.2941			6.00273	32.8451			5.99841	40.1354			5.98891	27.6639			5.99617	32.5887			5.98683
	6.00758	40.6095			6.00132	27.3761			6.04839	32.5982			6.07114	40.9236			4.11733	35.7361			6.06384	32.6538			6.06286	40.9994			3.47709	34.25			6.05273	32.7519			6.04841	40.137			6.03891	27.5907			6.04617	32.5077			6.03683
	6.05758	40.6133			6.05132	27.3116			6.09839	32.5081			6.12114	40.9299			4.16733	35.6879			6.11384	32.5594			6.11286	41.0078			3.52709	34.2059			6.10273	32.6588			6.09841	40.1381			6.08891	27.5228			6.09617	32.4266			6.08683
	6.10758	40.6166			6.10132	27.2525			6.14839	32.418			6.17114	40.9356			4.21733	35.6397			6.16384	32.4651			6.16286	41.0158			3.57709	34.1619			6.15273	32.5656			6.14841	40.1387			6.13891	27.4601			6.14616	32.3457			6.13683
	6.15758	40.6192			6.15132	27.1986			6.19839	32.328			6.22114	40.9407			4.26733	35.5916			6.21384	32.3709			6.21286	41.0232			3.62709	34.1179			6.20273	32.4726			6.19841	40.1387			6.18891	27.4026			6.19616	32.2648			6.18683
	6.20758	40.6214			6.20132	27.1499			6.24839	32.2383			6.27114	40.9454			4.31733	35.5435			6.26384	32.2771			6.26286	41.0301			3.67709	34.074			6.25273	32.3799			6.24841	40.1382			6.23891	27.3499			6.24617	32.184			6.23683
	6.25758	40.623			6.25132	27.1062			6.29839	32.1488			6.32114	40.9496			4.36733	35.4955			6.31384	32.1835			6.31286	41.0365			3.72709	34.0301			6.30273	32.2874			6.29841	40.1372			6.28891	27.302			6.29617	32.1035			6.28683
	6.30758	40.6241			6.30132	27.0674			6.34839	32.0596			6.37114	40.9533			4.41733	35.4475			6.36384	32.0904			6.36286	41.0425			3.77709	33.9862			6.35273	32.1953			6.34841	40.1358			6.33891	27.2588			6.34617	32.0232			6.33683
	6.35758	40.6247			6.35132	27.0336			6.39839	31.9709			6.42114	40.9566			4.46733	35.3996			6.41384	31.9978			6.41286	41.048			3.82709	33.9424			6.40273	32.1037			6.39841	40.1339			6.38891	27.2201			6.39616	31.9431			6.38683
	6.40758	40.6249			6.40132	27.0048			6.44839	31.8826			6.47114	40.9595			4.51733	35.3518			6.46384	31.9058			6.46286	41.0531			3.87709	33.8987			6.45273	32.0126			6.44841	40.1315			6.43891	27.1859			6.44616	31.8634			6.43683
	6.45758	40.6246			6.45132	26.9887			6.49839	31.7949			6.52114	40.9619			4.56733	35.304			6.51384	31.8145			6.51286	41.0578			3.92709	33.855			6.50273	31.9221			6.49841	40.1288			6.48891	27.156			6.49617	31.7841			6.48683
	6.50758	40.6239			6.50132	26.9965			6.54839	31.7077			6.57114	40.9639			4.61733	35.2562			6.56384	31.7239			6.56286	41.0621			3.97709	33.8113			6.55273	31.8323			6.54841	40.1256			6.53891	27.1305			6.54617	31.7053			6.53683
	6.55758	40.6228			6.55132	27.0241			6.59839	31.6213			6.62114	40.9656			4.66733	35.2086			6.61384	31.6341			6.61286	41.066			4.02709	33.7677			6.60273	31.7432			6.59841	40.122			6.58891	27.1096			6.59617	31.6268			6.58683
	6.60758	40.6213			6.60132	27.0677			6.64839	31.5355			6.67114	40.9668			4.71733	35.1609			6.66384	31.5451			6.66286	41.0696			4.07709	33.7242			6.65273	31.655			6.64841	40.1181			6.63891	27.1011			6.64616	31.5489			6.63683
	6.65758	40.6194			6.65132	27.1243			6.69839	31.4505			6.72114	40.9678			4.76733	35.1134			6.71384	31.4571			6.71286	41.0728			4.12709	33.6807			6.70273	31.5676			6.69841	40.1138			6.68891	27.1129			6.69616	31.4716			6.68683
	6.70758	40.6171			6.70132	27.1917			6.74839	31.3664			6.77114	40.9683			4.81733	35.0659			6.76384	31.37			6.76286	41.0756			4.17709	33.6372			6.75273	31.4811			6.74841	40.1092			6.73891	27.1413			6.74617	31.3948			6.73683
	6.75758	40.6145			6.75132	27.2681			6.79839	31.2831			6.82114	40.9685			4.86733	35.0184			6.81384	31.284			6.81286	41.0781			4.22709	33.5938			6.80273	31.3957			6.79841	40.1042			6.78891	27.1835			6.79617	31.3187			6.78683
	6.80758	40.6115			6.80132	27.3518			6.84839	31.2007			6.87114	40.9685			4.91733	34.971			6.86384	31.199			6.86286	41.0803			4.27709	33.5504			6.85273	31.3112			6.84841	40.0989			6.83891	27.237			6.84617	31.2432			6.83683
	6.85758	40.6082			6.85132	27.4417			6.89839	31.1193			6.92114	40.9681			4.96733	34.9236			6.91384	31.1152			6.91286	41.0822			4.32709	33.5071			6.90273	31.2278			6.89841	40.0933			6.88891	27.2999			6.89616	31.1684			6.88683
	6.90758	40.6046			6.90132	27.5367			6.94839	31.039			6.97114	40.9674			5.01733	34.8764			6.96384	31.0325			6.96286	41.0838			4.37709	33.4638			6.95273	31.1456			6.94841	40.0874			6.93891	27.3707			6.94616	31.0944			6.93683
	6.95758	40.6006			6.95132	27.636			6.99839	30.9596			7.02114	40.9664			5.06733	34.8291			7.01384	30.951			7.01286	41.0851			4.42709	33.4206			7.00273	31.0645			6.99841	40.0812			6.98891	27.4481			6.99617	31.0211			6.98683
	7.00758	40.5964			7.00132	27.7388			7.04839	30.8814			7.07114	40.9651			5.11733	34.7819			7.06384	30.8708			7.06286	41.0862			4.47709	33.3774			7.05273	30.9846			7.04841	40.0748			7.03891	27.5311			7.04617	30.9487			7.03683
	7.05758	40.5919			7.05132	27.8445			7.09839	30.8042			7.12114	40.9636			5.16733	34.7348			7.11384	30.7918			7.11286	41.087			4.52709	33.3342			7.10273	30.906			7.09841	40.0681			7.08891	27.6186			7.09617	30.877			7.08683
	7.10758	40.5871			7.10132	27.9526			7.14839	30.7282			7.17114	40.9618			5.21733	34.6877			7.16384	30.7142			7.16286	41.0875			4.57709	33.2911			7.15273	30.8286			7.14841	40.0611			7.13891	27.7101			7.14616	30.8062			7.13683
	7.15758	40.5821			7.15132	28.0626			7.19839	30.6534			7.22114	40.9598			5.26733	34.6407			7.21384	30.6378			7.21286	41.0878			4.62709	33.2481			7.20273	30.7525			7.19841	40.0539			7.18891	27.8048			7.19616	30.7363			7.18683
	7.20758	40.5768			7.20132	28.1742			7.24839	30.5797			7.27114	40.9576			5.31733	34.5937			7.26384	30.5628			7.26286	41.0878			4.67709	33.2051			7.25273	30.6777			7.24841	40.0465			7.23891	27.9023			7.24617	30.6673			7.23683
	7.25758	40.5713			7.25132	28.2869			7.29839	30.5073			7.32114	40.9551			5.36733	34.5468			7.31384	30.4892			7.31286	41.0876			4.72709	33.1621			7.30273	30.6043			7.29841	40.0388			7.28891	28.002			7.29617	30.5992			7.28683
	7.30758	40.5656			7.30132	28.4006			7.34839	30.4361			7.37114	40.9524			5.41733	34.5			7.36384	30.417			7.36286	41.0872			4.77709	33.1192			7.35273	30.5322			7.34841	40.0309			7.33891	28.1035			7.34617	30.5321			7.33683
	7.35758	40.5596			7.35132	28.5149			7.39839	30.3662			7.42114	40.9495			5.46733	34.4532			7.41384	30.3461			7.41286	41.0866			4.82709	33.0763			7.40273	30.4614			7.39841	40.0229			7.38891	28.2065			7.39616	30.4659			7.38683
	7.40758	40.5534			7.40132	28.6296			7.44839	30.2975			7.47114	40.9464			5.51733	34.4064			7.46384	30.2767			7.46286	41.0858			4.87709	33.0335			7.45273	30.3921			7.44841	40.0146			7.43891	28.3107			7.44616	30.4007			7.43683
	7.45758	40.547			7.45132	28.7446			7.49839	30.2302			7.52114	40.9431			5.56733	34.3597			7.51384	30.2086			7.51286	41.0848			4.92709	32.9907			7.50273	30.3241			7.49841	40.0062			7.48891	28.4159			7.49617	30.3365			7.48683
	7.50758	40.5405			7.50132	28.8597			7.54839	30.1641			7.57114	40.9397			5.61733	34.3131			7.56384	30.142			7.56286	41.0837			4.97709	32.9479			7.55273	30.2575			7.54841	39.9975			7.53891	28.5217			7.54617	30.2733			7.53683
	7.55758	40.5337			7.55132	28.9746			7.59839	30.0993			7.62114	40.936			5.66733	34.2665			7.61384	30.0768			7.61286	41.0823			5.02709	32.9053			7.60273	30.1924			7.59841	39.9887			7.58891	28.628			7.59617	30.2112			7.58683
	7.60758	40.5268			7.60132	29.0894			7.64839	30.0358			7.67114	40.9322			5.71733	34.22			7.66384	30.0131			7.66286	41.0808			5.07709	32.8626			7.65273	30.1286			7.64841	39.9798			7.63891	28.7347			7.64616	30.1501			7.63683
	7.65758	40.5197			7.65132	29.2039			7.69839	29.9736			7.72114	40.9283			5.76733	34.1735			7.71384	29.9508			7.71286	41.0791			5.12709	32.82			7.70273	30.0663			7.69841	39.9707			7.68891	28.8415			7.69616	30.09			7.68683
	7.70758	40.5125			7.70132	29.3179			7.74839	29.9128			7.77114	40.9242			5.81733	34.1271			7.76384	29.8899			7.76286	41.0773			5.17709	32.7775			7.75273	30.0054			7.74841	39.9614			7.73891	28.9483			7.74617	30.0309			7.73683
	7.75758	40.5051			7.75132	29.4314			7.79839	29.8532			7.82114	40.9199			5.86733	34.0807			7.81384	29.8304			7.81286	41.0753			5.22709	32.7349			7.80273	29.9458			7.79841	39.9521			7.78891	29.055			7.79617	29.973			7.78683
	7.80758	40.4976			7.80132	29.5444			7.84839	29.795			7.87114	40.9156			5.91733	34.0344			7.86384	29.7724			7.86286	41.0732			5.27709	32.6925			7.85273	29.8877			7.84841	39.9426			7.83891	29.1615			7.84617	29.9161			7.83683
	7.85758	40.49			7.85132	29.6566			7.89839	29.7381			7.92114	40.911			5.96733	33.9882			7.91384	29.7158			7.91286	41.0709			5.32709	32.65			7.90273	29.831			7.89841	39.9329			7.88891	29.2677			7.89616	29.8603			7.88683
	7.90758	40.4822			7.90132	29.7682			7.94839	29.6825			7.97114	40.9064			6.01733	33.9419			7.96384	29.6606			7.96286	41.0685			5.37709	32.6077			7.95273	29.7757			7.94841	39.9232			7.93891	29.3735			7.94616	29.8055			7.93683
	7.95758	40.4743			7.95132	29.879			7.99839	29.6282			8.02114	40.9017			6.06733	33.8958			8.01384	29.6067			8.01286	41.066			5.42709	32.5653			8.00273	29.7217			7.99841	39.9133			7.98891	29.4788			7.99617	29.7518			7.98683
	8.00758	40.4663			8.00132	29.989			8.04839	29.5752			8.07114	40.8968			6.11733	33.8497			8.06384	29.5543			8.06286	41.0634			5.47709	32.523			8.05273	29.6692			8.04841	39.9034			8.03891	29.5836			8.04617	29.6992			8.03683
	8.05758	40.4582			8.05132	30.0982			8.09839	29.5235			8.12114	40.8918			6.16733	33.8036			8.11384	29.5033			8.11286	41.0607			5.52709	32.4808			8.10273	29.618			8.09841	39.8933			8.08891	29.6878			8.09616	29.6477			8.08683
	8.10758	40.45			8.10132	30.2065			8.14839	29.473			8.17114	40.8868			6.21733	33.7576			8.16384	29.4536			8.16286	41.0579			5.57709	32.4386			8.15273	29.5682			8.14841	39.8832			8.13891	29.7914			8.14616	29.5972			8.13683
	8.15758	40.4417			8.15132	30.3139			8.19839	29.4239			8.22114	40.8816			6.26733	33.7117			8.21384	29.4053			8.21286	41.0549			5.62709	32.3964			8.20273	29.5197			8.19841	39.8729			8.18891	29.8943			8.19617	29.5478			8.18683
	8.20758	40.4333			8.20132	30.4203			8.24839	29.376			8.27114	40.8764			6.31733	33.6658			8.26384	29.3584			8.26286	41.0519			5.67709	32.3543			8.25273	29.4726			8.24841	39.8626			8.23891	29.9965			8.24616	29.4995			8.23683
	8.25758	40.4248			8.25132	30.5258			8.29839	29.3294			8.32114	40.8711			6.36733	33.62			8.31384	29.3127			8.31286	41.0488			5.72709	32.3123			8.30273	29.4268			8.29841	39.8523			8.28891	30.0979			8.29617	29.4523			8.28683
	8.30758	40.4163			8.30132	30.6304			8.34839	29.284			8.37114	40.8657			6.41733	33.5742			8.36384	29.2684			8.36286	41.0456			5.77709	32.2702			8.35273	29.3823			8.34841	39.8418			8.33891	30.1985			8.34616	29.4061			8.33683
	8.35758	40.4077			8.35132	30.7339			8.39839	29.2399			8.42114	40.8602			6.46733	33.5284			8.41384	29.2254			8.41286	41.0423			5.82709	32.2282			8.40273	29.3391			8.39841	39.8313			8.38891	30.2984			8.39616	29.361			8.38683
	8.40758	40.399			8.40132	30.8365			8.44839	29.197			8.47114	40.8547			6.51733	33.4828			8.46384	29.1837			8.46286	41.0389			5.87709	32.1863			8.45273	29.2971			8.44841	39.8208			8.43891	30.3974			8.44617	29.3169			8.43683
	8.45758	40.3903			8.45132	30.938			8.49839	29.1553			8.52114	40.8491			6.56733	33.4371			8.51384	29.1432			8.51286	41.0355			5.92709	32.1444			8.50273	29.2565			8.49841	39.8102			8.48891	30.4956			8.49616	29.2739			8.48683
	8.50758	40.3816			8.50132	31.0386			8.54839	29.1147			8.57114	40.8435			6.61733	33.3916			8.56384	29.104			8.56286	41.032			5.97709	32.1026			8.55273	29.2171			8.54841	39.7995			8.53891	30.5929			8.54617	29.2319			8.53683
	8.55758	40.3727			8.55132	31.1381			8.59839	29.0754			8.62114	40.8378			6.66733	33.346			8.61384	29.0661			8.61286	41.0285			6.02709	32.0608			8.60273	29.1789			8.59841	39.7888			8.58891	30.6893			8.59616	29.191			8.58683
	8.60758	40.3639			8.60132	31.2367			8.64839	29.0373			8.67114	40.832			6.71733	33.3006			8.66384	29.0294			8.66286	41.0249			6.07709	32.019			8.65273	29.142			8.64841	39.7781			8.63891	30.7848			8.64616	29.151			8.63683
	8.65758	40.355			8.65132	31.3342			8.69839	29.0003			8.72114	40.8263			6.76733	33.2551			8.71384	28.9939			8.71286	41.0212			6.12709	31.9773			8.70273	29.1062			8.69841	39.7673			8.68891	30.8795			8.69617	29.1121			8.68683
	8.70758	40.3461			8.70132	31.4307			8.74839	28.9644			8.77114	40.8204			6.81733	33.2098			8.76384	28.9595			8.76286	41.0175			6.17709	31.9356			8.75273	29.0717			8.74841	39.7565			8.73891	30.9732			8.74616	29.0742			8.73683
	8.75758	40.3372			8.75132	31.5262			8.79839	28.9297			8.82114	40.8146			6.86733	33.1645			8.81384	28.9264			8.81286	41.0137			6.22709	31.894			8.80273	29.0383			8.79841	39.7457			8.78891	31.066			8.79617	29.0373			8.78683
	8.80758	40.3282			8.80132	31.6206			8.84839	28.896			8.87114	40.8087			6.91733	33.1192			8.86384	28.8944			8.86286	41.0099			6.27709	31.8524			8.85273	29.0061			8.84841	39.7348			8.83891	31.1579			8.84616	29.0014			8.83683
	8.85758	40.3192			8.85132	31.7141			8.89839	28.8635			8.92114	40.8028			6.96733	33.074			8.91384	28.8635			8.91286	41.0061			6.32709	31.8108			8.90273	28.975			8.89841	39.724			8.88891	31.249			8.89616	28.9664			8.88683
	8.90758	40.3102			8.90132	31.8066			8.94839	28.8321			8.97114	40.7969			7.01733	33.0288			8.96384	28.8338			8.96286	41.0022			6.37709	31.7693			8.95273	28.945			8.94841	39.7131			8.93891	31.3391			8.94617	28.9324			8.93683
	8.95758	40.3012			8.95132	31.8981			8.99839	28.8017			9.02114	40.7909			7.06733	32.9837			9.01384	28.8052			9.01286	40.9983			6.42709	31.7279			9.00273	28.9162			8.99841	39.7022			8.98891	31.4282			8.99616	28.8994			8.98683
	9.00758	40.2922			9.00132	31.9885			9.04839	28.7724			9.07114	40.785			7.11733	32.9386			9.06384	28.7776			9.06286	40.9944			6.47709	31.6865			9.05273	28.8884			9.04841	39.6914			9.03891	31.5165			9.04617	28.8673			9.03683
	9.05758	40.2832			9.05132	32.078			9.09839	28.7441			9.12114	40.779			7.16733	32.8936			9.11384	28.7511			9.11286	40.9905			6.52709	31.6451			9.10273	28.8617			9.09841	39.6805			9.08891	31.6039			9.09616	28.8361			9.08683
	9.10758	40.2742			9.10132	32.1666			9.14839	28.7168			9.17114	40.773			7.21733	32.8487			9.16384	28.7257			9.16286	40.9865			6.57709	31.6037			9.15273	28.836			9.14841	39.6696			9.13891	31.6903			9.14616	28.8059			9.13683
	9.15758	40.2652			9.15132	32.2541			9.19839	28.6905			9.22114	40.767			7.26733	32.8038			9.21384	28.7013			9.21286	40.9825			6.62709	31.5625			9.20273	28.8114			9.19841	39.6587			9.18891	31.7759			9.19617	28.7766			9.18683
	9.20758	40.2562			9.20132	32.3407			9.24839	28.6652			9.27114	40.761			7.31733	32.7589			9.26384	28.6779			9.26286	40.9785			6.67709	31.5212			9.25273	28.7878			9.24841	39.6479			9.23891	31.8606			9.24616	28.7481			9.23683
	9.25758	40.2473			9.25132	32.4263			9.29839	28.6409			9.32114	40.755			7.36733	32.7141			9.31384	28.6555			9.31286	40.9745			6.72709	31.48			9.30273	28.7652			9.29841	39.637			9.28891	31.9444			9.29617	28.7206			9.28683
	9.30758	40.2383			9.30132	32.5111			9.34839	28.6175			9.37114	40.749			7.41733	32.6693			9.36384	28.6341			9.36286	40.9704			6.77709	31.4389			9.35273	28.7436			9.34841	39.6262			9.33891	32.0272			9.34616	28.6939			9.33683
	9.35758	40.2294			9.35132	32.5948			9.39839	28.5951			9.42114	40.7431			7.46733	32.6246			9.41384	28.6137			9.41286	40.9664			6.82709	31.3977			9.40273	28.7229			9.39841	39.6154			9.38891	32.1093			9.39616	28.6681			9.38683
	9.40758	40.2205			9.40132	32.6777			9.44839	28.5736			9.47114	40.7371			7.51733	32.58			9.46384	28.5942			9.46286	40.9624			6.87709	31.3567			9.45273	28.7032			9.44841	39.6046			9.43891	32.1904			9.44617	28.6432			9.43683
	9.45758	40.2116			9.45132	32.7596			9.49839	28.553			9.52114	40.7311			7.56733	32.5354			9.51384	28.5757			9.51286	40.9583			6.92709	31.3156			9.50273	28.6845			9.49841	39.5938			9.48891	32.2707			9.49616	28.6191			9.48683
	9.50758	40.2027			9.50132	32.8406			9.54839	28.5333			9.57114	40.7252			7.61733	32.4908			9.56384	28.558			9.56286	40.9543			6.97709	31.2746			9.55273	28.6666			9.54841	39.5831			9.53891	32.3501			9.54617	28.5958			9.53683
	9.55758	40.1939			9.55132	32.9208			9.59839	28.5145			9.62114	40.7193			7.66733	32.4463			9.61384	28.5413			9.61286	40.9502			7.02709	31.2337			9.60273	28.6496			9.59841	39.5723			9.58891	32.4287			9.59616	28.5733			9.58683
	9.60758	40.1851			9.60132	33			9.64839	28.4966			9.67114	40.7134			7.71733	32.4019			9.66384	28.5254			9.66286	40.9462			7.07709	31.1928			9.65273	28.6336			9.64841	39.5617			9.63891	32.5064			9.64616	28.5516			9.63683
	9.65758	40.1764			9.65132	33.0784			9.69839	28.4794			9.72114	40.7075			7.76733	32.3575			9.71384	28.5104			9.71286	40.9422			7.12709	31.1519			9.70273	28.6183			9.69841	39.551			9.68891	32.5833			9.69617	28.5307			9.68683
	9.70758	40.1677			9.70132	33.156			9.74839	28.4632			9.77114	40.7016			7.81733	32.3131			9.76384	28.4962			9.76286	40.9381			7.17709	31.1111			9.75273	28.604			9.74841	39.5404			9.73891	32.6594			9.74616	28.5106			9.73683
	9.75758	40.159			9.75132	33.2326			9.79839	28.4477			9.82114	40.6958			7.86733	32.2688			9.81384	28.4829			9.81286	40.9341			7.22709	31.0703			9.80273	28.5905			9.79841	39.5298			9.78891	32.7347			9.79617	28.4913			9.78683
	9.80758	40.1504			9.80132	33.3085			9.84839	28.433			9.87114	40.69			7.91733	32.2246			9.86384	28.4704			9.86286	40.9301			7.27709	31.0296			9.85273	28.5778			9.84841	39.5193			9.83891	32.8091			9.84616	28.4727			9.83683
	9.85758	40.1418			9.85132	33.3835			9.89839	28.4192			9.92114	40.6842			7.96733	32.1804			9.91384	28.4587			9.91286	40.9261			7.32709	30.9889			9.90273	28.5659			9.89841	39.5088			9.88891	32.8828			9.89616	28.4548			9.88683
	9.90758	40.1333			9.90132	33.4577			9.94839	28.4061			9.97114	40.6785			8.01733	32.1362			9.96384	28.4478			9.96286	40.9222			7.37709	30.9482			9.95273	28.5547			9.94841	39.4983			9.93891	32.9557			9.94617	28.4377			9.93683
	9.95758	40.1248			9.95132	33.5311			9.99839	28.3937			10.0211	40.6728			8.06733	32.0921			10.0138	28.4376			10.0129	40.9182			7.42709	30.9076			10.0027	28.5444			9.99841	39.4879			9.98891	33.0278			9.99616	28.4213			9.98683
	10.0076	40.1164			10.0013	33.6037			10.0484	28.3821			10.0711	40.6671			8.11733	32.048			10.0638	28.4283			10.0629	40.9143			7.47709	30.867			10.0527	28.5348			10.0484	39.4775			10.0389	33.0991			10.0462	28.4056			10.0368
	10.0576	40.108			10.0513	33.6755			10.0984	28.3713			10.1211	40.6615			8.16733	32.004			10.1138	28.4196			10.1129	40.9104			7.52709	30.8265			10.1027	28.526			10.0984	39.4672			10.0889	33.1696			10.0962	28.3906			10.0868
	10.1076	40.0997			10.1013	33.7465			10.1484	28.3611			10.1711	40.6559			8.21733	31.9601			10.1638	28.4117			10.1629	40.9065			7.57709	30.786			10.1527	28.5179			10.1484	39.457			10.1389	33.2394			10.1462	28.3763			10.1368
	10.1576	40.0914			10.1513	33.8168			10.1984	28.3517			10.2211	40.6503			8.26733	31.9162			10.2138	28.4045			10.2129	40.9026			7.62709	30.7456			10.2027	28.5105			10.1984	39.4468			10.1889	33.3085			10.1962	28.3626			10.1868
	10.2076	40.0832			10.2013	33.8863			10.2484	28.3429			10.2711	40.6448			8.31733	31.8723			10.2638	28.3979			10.2629	40.8988			7.67709	30.7052			10.2527	28.5038			10.2484	39.4366			10.2389	33.3768			10.2462	28.3496			10.2368
	10.2576	40.0751			10.2513	33.9551			10.2984	28.3348			10.3211	40.6393			8.36733	31.8285			10.3138	28.3921			10.3129	40.895			7.72709	30.6648			10.3027	28.4978			10.2984	39.4265			10.2889	33.4445			10.2962	28.3373			10.2868
	10.3076	40.067			10.3013	34.0231			10.3484	28.3274			10.3711	40.6339			8.41733	31.7847			10.3638	28.3869			10.3629	40.8912			7.77709	30.6245			10.3527	28.4925			10.3484	39.4165			10.3389	33.5113			10.3462	28.3256			10.3368
	10.3576	40.059			10.3513	34.0904			10.3984	28.3206			10.4211	40.6285			8.46733	31.741			10.4138	28.3824			10.4129	40.8875			7.82709	30.5842			10.4027	28.4878			10.3984	39.4065			10.3889	33.5775			10.3962	28.3145			10.3868
	10.4076	40.051			10.4013	34.157			10.4484	28.3145			10.4711	40.6232			8.51733	31.6974			10.4638	28.3786			10.4629	40.8838			7.87709	30.5439			10.4527	28.4838			10.4484	39.3965			10.4389	33.643			10.4462	28.304			10.4368
	10.4576	40.0431			10.4513	34.223			10.4984	28.309			10.5211	40.6179			8.56733	31.6538			10.5138	28.3753			10.5129	40.8801			7.92709	30.5037			10.5027	28.4804			10.4984	39.3867			10.4889	33.7078			10.4962	28.2941			10.4868
	10.5076	40.0353			10.5013	34.2882			10.5484	28.3041			10.5711	40.6127			8.61733	31.6102			10.5638	28.3727			10.5629	40.8764			7.97709	30.4636			10.5527	28.4776			10.5484	39.3769			10.5389	33.772			10.5462	28.2848			10.5368
	10.5576	40.0276			10.5513	34.3527			10.5984	28.2998			10.6211	40.6075			8.66733	31.5667			10.6138	28.3707			10.6129	40.8728			8.02709	30.4235			10.6027	28.4754			10.5984	39.3671			10.5889	33.8354			10.5962	28.2761			10.5868
	10.6076	40.0199			10.6013	34.4165			10.6484	28.2961			10.6711	40.6024			8.71733	31.5232			10.6638	28.3693			10.6629	40.8692			8.07709	30.3834			10.6527	28.4739			10.6484	39.3574			10.6389	33.8982			10.6462	28.268			10.6368
	10.6576	40.0123			10.6513	34.4797			10.6984	28.293			10.7211	40.5973			8.76733	31.4798			10.7138	28.3684			10.7129	40.8657			8.12709	30.3433			10.7027	28.4729			10.6984	39.3478			10.6889	33.9603			10.6962	28.2604			10.6868
	10.7076	40.0048			10.7013	34.5423			10.7484	28.2904			10.7711	40.5923			8.81733	31.4364			10.7638	28.3681			10.7629	40.8622			8.17709	30.3034			10.7527	28.4725			10.7484	39.3383			10.7389	34.0218			10.7462	28.2534			10.7368
	10.7576	39.9973			10.7513	34.6042			10.7984	28.2884			10.8211	40.5873			8.86733	31.3931			10.8138	28.3684			10.8129	40.8587			8.22709	30.2634			10.8027	28.4726			10.7984	39.3288			10.7889	34.0827			10.7962	28.2469			10.7868
	10.8076	39.9899			10.8013	34.6654			10.8484	28.2869			10.8711	40.5824			8.91733	31.3498			10.8638	28.3692			10.8629	40.8553			8.27709	30.2235			10.8527	28.4733			10.8484	39.3194			10.8389	34.1429			10.8462	28.2409			10.8368
	10.8576	39.9826			10.8513	34.726			10.8984	28.286			10.9211	40.5776			8.96733	31.3066			10.9138	28.3706			10.9129	40.8519			8.32709	30.1836			10.9027	28.4745			10.8984	39.31			10.8889	34.2026			10.8962	28.2355			10.8868
	10.9076	39.9754			10.9013	34.7861			10.9484	28.2856			10.9711	40.5728			9.01733	31.2634			10.9638	28.3724			10.9629	40.8485			8.37709	30.1438			10.9527	28.4763			10.9484	39.3007			10.9389	34.2616			10.9462	28.2306			10.9368
	10.9576	39.9682			10.9513	34.8455			10.9984	28.2857			11.0211	40.568			9.06733	31.2203			11.0138	28.3748			11.0129	40.8452			8.42709	30.104			11.0027	28.4785			10.9984	39.2915			10.9889	34.32			10.9962	28.2261			10.9868
	11.0076	39.9611			11.0013	34.9043			11.0484	28.2862			11.0711	40.5634			9.11733	31.1772			11.0638	28.3777			11.0629	40.842			8.47709	30.0642			11.0527	28.4813			11.0484	39.2824			11.0389	34.3778			11.0462	28.2222			11.0368
	11.0576	39.9541			11.0513	34.9625			11.0984	28.2873			11.1211	40.5587			9.16733	31.1342			11.1138	28.3811			11.1129	40.8387			8.52709	30.0245			11.1027	28.4846			11.0984	39.2733			11.0889	34.435			11.0962	28.2187			11.0868
	11.1076	39.9472			11.1013	35.0201			11.1484	28.2889			11.1711	40.5542			9.21733	31.0912			11.1638	28.3849			11.1629	40.8356			8.57709	29.9848			11.1527	28.4883			11.1484	39.2643			11.1389	34.4917			11.1462	28.2157			11.1368
	11.1576	39.9403			11.1513	35.0772			11.1984	28.2909			11.2211	40.5497			9.26733	31.0482			11.2138	28.3892			11.2129	40.8324			8.62709	29.9452			11.2027	28.4925			11.1984	39.2554			11.1889	34.5477			11.1962	28.2132			11.1868
	11.2076	39.9336			11.2013	35.1337			11.2484	28.2933			11.2711	40.5452			9.31733	31.0053			11.2638	28.394			11.2629	40.8293			8.67709	29.9056			11.2527	28.4971			11.2484	39.2465			11.2389	34.6033			11.2462	28.2111			11.2368
	11.2576	39.9269			11.2513	35.1896			11.2984	28.2963			11.3211	40.5408			9.36733	30.9625			11.3138	28.3992			11.3129	40.8263			8.72709	29.8661			11.3027	28.5023			11.2984	39.2377			11.2889	34.6582			11.2962	28.2094			11.2868
	11.3076	39.9202			11.3013	35.245			11.3484	28.2996			11.3711	40.5365			9.41733	30.9197			11.3638	28.4048			11.3629	40.8233			8.77709	29.8265			11.3527	28.5078			11.3484	39.229			11.3389	34.7126			11.3462	28.2082			11.3368
	11.3576	39.9137			11.3513	35.2998			11.3984	28.3034			11.4211	40.5323			9.46733	30.8769			11.4138	28.4109			11.4129	40.8203			8.82709	29.7871			11.4027	28.5138			11.3984	39.2203			11.3889	34.7665			11.3962	28.2074			11.3868
	11.4076	39.9072			11.4013	35.3541			11.4484	28.3076			11.4711	40.5281			9.51733	30.8342			11.4638	28.4174			11.4629	40.8174			8.87709	29.7476			11.4527	28.5202			11.4484	39.2118			11.4389	34.8199			11.4462	28.2071			11.4368
	11.4576	39.9009			11.4513	35.4079			11.4984	28.3122			11.5211	40.5239			9.56733	30.7916			11.5138	28.4243			11.5129	40.8146			8.92709	29.7082			11.5027	28.527			11.4984	39.2033			11.4889	34.8727			11.4962	28.2071			11.4868
	11.5076	39.8945			11.5013	35.4612			11.5484	28.3172			11.5711	40.5199			9.61733	30.749			11.5638	28.4315			11.5629	40.8118			8.97709	29.6689			11.5527	28.5342			11.5484	39.1948			11.5389	34.925			11.5462	28.2075			11.5368
	11.5576	39.8883			11.5513	35.5139			11.5984	28.3226			11.6211	40.5159			9.66733	30.7064			11.6138	28.4392			11.6129	40.809			9.02709	29.6296			11.6027	28.5418			11.5984	39.1865			11.5889	34.9768			11.5962	28.2084			11.5868
	11.6076	39.8822			11.6013	35.5662			11.6484	28.3284			11.6711	40.5119			9.71733	30.6639			11.6638	28.4473			11.6629	40.8063			9.07709	29.5903			11.6527	28.5498			11.6484	39.1782			11.6389	35.0281			11.6462	28.2096			11.6368
	11.6576	39.8761			11.6513	35.6179			11.6984	28.3345			11.7211	40.508			9.76733	30.6214			11.7138	28.4557			11.7129	40.8036			9.12709	29.5511			11.7027	28.5581			11.6984	39.17			11.6889	35.0789			11.6962	28.2112			11.6868
	11.7076	39.8701			11.7013	35.6692			11.7484	28.3411			11.7711	40.5042			9.81733	30.579			11.7638	28.4645			11.7629	40.801			9.17709	29.5119			11.7527	28.5669			11.7484	39.1618			11.7389	35.1292			11.7462	28.2131			11.7368
	11.7576	39.8642			11.7513	35.7199			11.7984	28.3479			11.8211	40.5004			9.86733	30.5366			11.8138	28.4736			11.8129	40.7984			9.22709	29.4727			11.8027	28.576			11.7984	39.1538			11.7889	35.179			11.7962	28.2154			11.7868
	11.8076	39.8584			11.8013	35.7702			11.8484	28.3552			11.8711	40.4967			9.91733	30.4943			11.8638	28.4831			11.8629	40.7959			9.27709	29.4336			11.8527	28.5854			11.8484	39.1458			11.8389	35.2284			11.8462	28.2181			11.8368
	11.8576	39.8527			11.8513	35.8201			11.8984	28.3627			11.9211	40.4931			9.96733	30.452			11.9138	28.4929			11.9129	40.7934			9.32709	29.3945			11.9027	28.5952			11.8984	39.1379			11.8889	35.2773			11.8962	28.2211			11.8868
	11.9076	39.847			11.9013	35.8694			11.9484	28.3706			11.9711	40.4895			10.0173	30.4098			11.9638	28.5031			11.9629	40.791			9.37709	29.3555			11.9527	28.6053			11.9484	39.13			11.9389	35.3257			11.9462	28.2244			11.9368
	11.9576	39.8414			11.9513	35.9183			11.9984	28.3789			12.0211	40.486			10.0673	30.3676			12.0138	28.5136			12.0129	40.7886			9.42709	29.3165			12.0027	28.6157			11.9984	39.1222			11.9889	35.3736			11.9962	28.2281			11.9868
	12.0076	39.8359			12.0013	35.9668			12.0484	28.3874			12.0711	40.4826			10.1173	30.3254			12.0638	28.5244			12.0629	40.7863			9.47709	29.2775			12.0527	28.6264			12.0484	39.1145			12.0389	35.4211			12.0462	28.2321			12.0368
	12.0576	39.8305			12.0513	36.0148			12.0984	28.3963			12.1211	40.4792			10.1673	30.2833			12.1138	28.5355			12.1129	40.784			9.52709	29.2386			12.1027	28.6375			12.0984	39.1069			12.0889	35.4682			12.0962	28.2364			12.0868
	12.1076	39.8251			12.1013	36.0624			12.1484	28.4054			12.1711	40.4759			10.2173	30.2413			12.1638	28.5469			12.1629	40.7817			9.57709	29.1997			12.1527	28.6489			12.1484	39.0993			12.1389	35.5148			12.1462	28.241			12.1368
	12.1576	39.8199			12.1513	36.1095			12.1984	28.4149			12.2211	40.4726			10.2673	30.1993			12.2138	28.5586			12.2129	40.7795			9.62709	29.1608			12.2027	28.6605			12.1984	39.0919			12.1889	35.561			12.1962	28.2459			12.1868
	12.2076	39.8147			12.2013	36.1562			12.2484	28.4246			12.2711	40.4694			10.3173	30.1573			12.2638	28.5705			12.2629	40.7774			9.67709	29.122			12.2527	28.6725			12.2484	39.0845			12.2389	35.6068			12.2462	28.2512			12.2368
	12.2576	39.8096			12.2513	36.2025			12.2984	28.4346			12.3211	40.4663			10.3673	30.1154			12.3138	28.5828			12.3129	40.7753			9.72709	29.0833			12.3027	28.6847			12.2984	39.0771			12.2889	35.6521			12.2962	28.2567			12.2868
	12.3076	39.8045			12.3013	36.2484			12.3484	28.445			12.3711	40.4633			10.4173	30.0735			12.3638	28.5953			12.3629	40.7733			9.77709	29.0445			12.3527	28.6972			12.3484	39.0698			12.3389	35.697			12.3462	28.2624			12.3368
	12.3576	39.7996			12.3513	36.2939			12.3984	28.4555			12.4211	40.4602			10.4673	30.0317			12.4138	28.6081			12.4129	40.7713			9.82709	29.0059			12.4027	28.7099			12.3984	39.0626			12.3889	35.7416			12.3962	28.2685			12.3868
	12.4076	39.7947			12.4013	36.339			12.4484	28.4664			12.4711	40.4573			10.5173	29.9899			12.4638	28.6212			12.4629	40.7693			9.87709	28.9672			12.4527	28.723			12.4484	39.0555			12.4389	35.7857			12.4462	28.2748			12.4368
	12.4576	39.7899			12.4513	36.3836			12.4984	28.4774			12.5211	40.4544			10.5673	29.9482			12.5138	28.6345			12.5129	40.7674			9.92709	28.9286			12.5027	28.7363			12.4984	39.0485			12.4889	35.8294			12.4962	28.2814			12.4868
	12.5076	39.7852			12.5013	36.4279			12.5484	28.4888			12.5711	40.4516			10.6173	29.9065			12.5638	28.648			12.5629	40.7656			9.97709	28.89			12.5527	28.7498			12.5484	39.0415			12.5389	35.8727			12.5462	28.2883			12.5368
	12.5576	39.7805			12.5513	36.4718			12.5984	28.5004			12.6211	40.4488			10.6673	29.8648			12.6138	28.6618			12.6129	40.7638			10.0271	28.8515			12.6027	28.7636			12.5984	39.0346			12.5889	35.9156			12.5962	28.2954			12.5868
	12.6076	39.776			12.6013	36.5153			12.6484	28.5122			12.6711	40.4461			10.7173	29.8232			12.6638	28.6758			12.6629	40.762			10.0771	28.813			12.6527	28.7776			12.6484	39.0277			12.6389	35.9582			12.6462	28.3027			12.6368
	12.6576	39.7715			12.6513	36.5584			12.6984	28.5242			12.7211	40.4435			10.7673	29.7817			12.7138	28.69			12.7129	40.7603			10.1271	28.7745			12.7027	28.7918			12.6984	39.0209			12.6889	36.0003			12.6962	28.3103			12.6868
	12.7076	39.767			12.7013	36.6012			12.7484	28.5365			12.7711	40.4409			10.8173	29.7402			12.7638	28.7045			12.7629	40.7586			10.1771	28.7361			12.7527	28.8063			12.7484	39.0142			12.7389	36.0421			12.7462	28.3181			12.7368
	12.7576	39.7627			12.7513	36.6436			12.7984	28.549			12.8211	40.4384			10.8673	29.6987			12.8138	28.7192			12.8129	40.757			10.2271	28.6977			12.8027	28.8209			12.7984	39.0076			12.7889	36.0835			12.7962	28.3262			12.7868
	12.8076	39.7584			12.8013	36.6856			12.8484	28.5617			12.8711	40.4359			10.9173	29.6573			12.8638	28.7341			12.8629	40.7555			10.2771	28.6594			12.8527	28.8358			12.8484	39.001			12.8389	36.1246			12.8462	28.3345			12.8368
	12.8576	39.7542			12.8513	36.7273			12.8984	28.5746			12.9211	40.4335			10.9673	29.6159			12.9138	28.7491			12.9129	40.7539			10.3271	28.6211			12.9027	28.8509			12.8984	38.9945			12.8889	36.1653			12.8962	28.3429			12.8868
	12.9076	39.7501			12.9013	36.7686			12.9484	28.5877			12.9711	40.4312			11.0173	29.5746			12.9638	28.7644			12.9629	40.7525			10.3771	28.5828			12.9527	28.8662			12.9484	38.9881			12.9389	36.2056			12.9462	28.3516			12.9368
	12.9576	39.746			12.9513	36.8096			12.9984	28.6011			13.0211	40.4289			11.0673	29.5333			13.0138	28.7799			13.0129	40.751			10.4271	28.5445			13.0027	28.8817			12.9984	38.9817			12.9889	36.2456			12.9962	28.3606			12.9868
	13.0076	39.742			13.0013	36.8502			13.0484	28.6146			13.0711	40.4267			11.1173	29.492			13.0638	28.7956			13.0629	40.7496			10.4771	28.5064			13.0527	28.8974			13.0484	38.9754			13.0389	36.2852			13.0462	28.3697			13.0368
	13.0576	39.7381			13.0513	36.8905			13.0984	28.6283			13.1211	40.4245			11.1673	29.4509			13.1138	28.8114			13.1129	40.7483			10.5271	28.4682			13.1027	28.9133			13.0984	38.9692			13.0889	36.3245			13.0962	28.379			13.0868
	13.1076	39.7343			13.1013	36.9304			13.1484	28.6422			13.1711	40.4224			11.2173	29.4097			13.1638	28.8275			13.1629	40.747			10.5771	28.4301			13.1527	28.9293			13.1484	38.963			13.1389	36.3634			13.1462	28.3885			13.1368
	13.1576	39.7305			13.1513	36.97			13.1984	28.6562			13.2211	40.4203			11.2673	29.3686			13.2138	28.8437			13.2129	40.7458			10.6271	28.392			13.2027	28.9455			13.1984	38.9569			13.1889	36.4021			13.1962	28.3982			13.1868
	13.2076	39.7268			13.2013	37.0093			13.2484	28.6704			13.2711	40.4183			11.3173	29.3275			13.2638	28.86			13.2629	40.7446			10.6771	28.3539			13.2527	28.9619			13.2484	38.9508			13.2389	36.4404			13.2462	28.408			13.2368
	13.2576	39.7232			13.2513	37.0483			13.2984	28.6848			13.3211	40.4164			11.3673	29.2865			13.3138	28.8766			13.3129	40.7434			10.7271	28.3159			13.3027	28.9785			13.2984	38.9448			13.2889	36.4783			13.2962	28.4181			13.2868
	13.3076	39.7196			13.3013	37.0869			13.3484	28.6994			13.3711	40.4145			11.4173	29.2455			13.3638	28.8933			13.3629	40.7423			10.7771	28.278			13.3527	28.9952			13.3484	38.9389			13.3389	36.516			13.3462	28.4283			13.3368
	13.3576	39.7161			13.3513	37.1253			13.3984	28.7141			13.4211	40.4127			11.4673	29.2046			13.4138	28.9101			13.4129	40.7412			10.8271	28.24			13.4027	29.0121			13.3984	38.9331			13.3889	36.5533			13.3962	28.4387			13.3868
	13.4076	39.7127			13.4013	37.1633			13.4484	28.729			13.4711	40.4109			11.5173	29.1637			13.4638	28.9271			13.4629	40.7402			10.8771	28.2021			13.4527	29.0291			13.4484	38.9273			13.4389	36.5903			13.4462	28.4493			13.4368
	13.4576	39.7093			13.4513	37.201			13.4984	28.744			13.5211	40.4092			11.5673	29.1229			13.5138	28.9442			13.5129	40.7392			10.9271	28.1643			13.5027	29.0463			13.4984	38.9215			13.4889	36.627			13.4962	28.46			13.4868
	13.5076	39.706			13.5013	37.2384			13.5484	28.7592			13.5711	40.4075			11.6173	29.0821			13.5638	28.9615			13.5629	40.7382			10.9771	28.1265			13.5527	29.0636			13.5484	38.9159			13.5389	36.6634			13.5462	28.4709			13.5368
	13.5576	39.7028			13.5513	37.2755			13.5984	28.7745			13.6211	40.4059			11.6673	29.0413			13.6138	28.9789			13.6129	40.7373			11.0271	28.0887			13.6027	29.081			13.5984	38.9103			13.5889	36.6995			13.5962	28.4819			13.5868
	13.6076	39.6996			13.6013	37.3123			13.6484	28.79			13.6711	40.4043			11.7173	29.0006			13.6638	28.9965			13.6629	40.7365			11.0771	28.0509			13.6527	29.0986			13.6484	38.9047			13.6389	36.7352			13.6462	28.4931			13.6368
	13.6576	39.6965			13.6513	37.3488			13.6984	28.8056			13.7211	40.4028			11.7673	28.9599			13.7138	29.0141			13.7129	40.7357			11.1271	28.0132			13.7027	29.1163			13.6984	38.8992			13.6889	36.7707			13.6962	28.5044			13.6868
	13.7076	39.6934			13.7013	37.3851			13.7484	28.8213			13.7711	40.4013			11.8173	28.9193			13.7638	29.0319			13.7629	40.7349			11.1771	27.9756			13.7527	29.1342			13.7484	38.8938			13.7389	36.8059			13.7462	28.5159			13.7368
	13.7576	39.6905			13.7513	37.421			13.7984	28.8371			13.8211	40.3999			11.8673	28.8787			13.8138	29.0499			13.8129	40.7341			11.2271	27.9379			13.8027	29.1522			13.7984	38.8884			13.7889	36.8408			13.7962	28.5275			13.7868
	13.8076	39.6875			13.8013	37.4567			13.8484	28.8531			13.8711	40.3985			11.9173	28.8382			13.8638	29.0679			13.8629	40.7334			11.2771	27.9003			13.8527	29.1702			13.8484	38.8831			13.8389	36.8755			13.8462	28.5392			13.8368
	13.8576	39.6847			13.8513	37.492			13.8984	28.8692			13.9211	40.3972			11.9673	28.7977			13.9138	29.086			13.9129	40.7328			11.3271	27.8628			13.9027	29.1884			13.8984	38.8778			13.8889	36.9098			13.8962	28.5511			13.8868
	13.9076	39.6819			13.9013	37.5271			13.9484	28.8853			13.9711	40.3959			12.0173	28.7572			13.9638	29.1043			13.9629	40.7322			11.3771	27.8252			13.9527	29.2068			13.9484	38.8726			13.9389	36.9439			13.9462	28.563			13.9368
	13.9576	39.6791			13.9513	37.562			13.9984	28.9017			14.0211	40.3947			12.0673	28.7168			14.0138	29.1227			14.0129	40.7316			11.4271	27.7877			14.0027	29.2252			13.9984	38.8675			13.9889	36.9776			13.9962	28.5752			13.9868
	14.0076	39.6765			14.0013	37.5965			14.0484	28.9181			14.0711	40.3935			12.1173	28.6765			14.0638	29.1411			14.0629	40.731			11.4771	27.7503			14.0527	29.2437			14.0484	38.8624			14.0389	37.0111			14.0462	28.5874			14.0368
	14.0576	39.6738			14.0513	37.6308			14.0984	28.9346			14.1211	40.3924			12.1673	28.6361			14.1138	29.1597			14.1129	40.7305			11.5271	27.7129			14.1027	29.2623			14.0984	38.8573			14.0889	37.0444			14.0962	28.5997			14.0868
	14.1076	39.6713			14.1013	37.6649			14.1484	28.9512			14.1711	40.3913			12.2173	28.5959			14.1638	29.1783			14.1629	40.7301			11.5771	27.6755			14.1527	29.281			14.1484	38.8523			14.1389	37.0774			14.1462	28.6122			14.1368
	14.1576	39.6688			14.1513	37.6986			14.1984	28.9679			14.2211	40.3903			12.2673	28.5556			14.2138	29.1971			14.2129	40.7296			11.6271	27.6381			14.2027	29.2999			14.1984	38.8474			14.1889	37.1101			14.1962	28.6247			14.1868
	14.2076	39.6663			14.2013	37.7321			14.2484	28.9847			14.2711	40.3893			12.3173	28.5154			14.2638	29.2159			14.2629	40.7292			11.6771	27.6008			14.2527	29.3188			14.2484	38.8425			14.2389	37.1425			14.2462	28.6374			14.2368
	14.2576	39.6639			14.2513	37.7654			14.2984	29.0016			14.3211	40.3884			12.3673	28.4753			14.3138	29.2348			14.3129	40.7289			11.7271	27.5636			14.3027	29.3378			14.2984	38.8377			14.2889	37.1747			14.2962	28.6502			14.2868
	14.3076	39.6616			14.3013	37.7984			14.3484	29.0186			14.3711	40.3875			12.4173	28.4352			14.3638	29.2538			14.3629	40.7285			11.7771	27.5263			14.3527	29.3568			14.3484	38.8329			14.3389	37.2066			14.3462	28.663			14.3368
	14.3576	39.6593			14.3513	37.8312			14.3984	29.0356			14.4211	40.3866			12.4673	28.3951			14.4138	29.2729			14.4129	40.7283			11.8271	27.4891			14.4027	29.376			14.3984	38.8282			14.3889	37.2383			14.3962	28.676			14.3868
	14.4076	39.6571			14.4013	37.8637			14.4484	29.0528			14.4711	40.3858			12.5173	28.3551			14.4638	29.2921			14.4629	40.728			11.8771	27.452			14.4527	29.3952			14.4484	38.8235			14.4389	37.2698			14.4462	28.689			14.4368
	14.4576	39.6549			14.4513	37.8959			14.4984	29.07			14.5211	40.3851			12.5673	28.3151			14.5138	29.3113			14.5129	40.7278			11.9271	27.4149			14.5027	29.4145			14.4984	38.8189			14.4889	37.301			14.4962	28.7022			14.4868
	14.5076	39.6528			14.5013	37.9279			14.5484	29.0873			14.5711	40.3843			12.6173	28.2751			14.5638	29.3306			14.5629	40.7276			11.9771	27.3778			14.5527	29.4339			14.5484	38.8143			14.5389	37.3319			14.5462	28.7154			14.5368
	14.5576	39.6507			14.5513	37.9597			14.5984	29.1047			14.6211	40.3837			12.6673	28.2352			14.6138	29.35			14.6129	40.7274			12.0271	27.3407			14.6027	29.4534			14.5984	38.8098			14.5889	37.3626			14.5962	28.7287			14.5868
	14.6076	39.6487			14.6013	37.9913			14.6484	29.1221			14.6711	40.383			12.7173	28.1954			14.6638	29.3694			14.6629	40.7273			12.0771	27.3037			14.6527	29.4729			14.6484	38.8053			14.6389	37.3931			14.6462	28.7421			14.6368
	14.6576	39.6467			14.6513	38.0226			14.6984	29.1396			14.7211	40.3824			12.7673	28.1556			14.7138	29.3889			14.7129	40.7272			12.1271	27.2667			14.7027	29.4925			14.6984	38.8008			14.6889	37.4233			14.6962	28.7556			14.6868
	14.7076	39.6448			14.7013	38.0537			14.7484	29.1572			14.7711	40.3819			12.8173	28.1158			14.7638	29.4085			14.7629	40.7272			12.1771	27.2298			14.7527	29.5121			14.7484	38.7965			14.7389	37.4533			14.7462	28.7691			14.7368
	14.7576	39.6429			14.7513	38.0845			14.7984	29.1749			14.8211	40.3813			12.8673	28.0761			14.8138	29.4281			14.8129	40.7272			12.2271	27.1929			14.8027	29.5318			14.7984	38.7921			14.7889	37.483			14.7962	28.7828			14.7868
	14.8076	39.6411			14.8013	38.1151			14.8484	29.1925			14.8711	40.3809			12.9173	28.0364			14.8638	29.4477			14.8629	40.7272			12.2771	27.156			14.8527	29.5516			14.8484	38.7878			14.8389	37.5126			14.8462	28.7964			14.8368
	14.8576	39.6393			14.8513	38.1455			14.8984	29.2103			14.9211	40.3804			12.9673	27.9967			14.9138	29.4675			14.9129	40.7272			12.3271	27.1191			14.9027	29.5714			14.8984	38.7836			14.8889	37.5419			14.8962	28.8102			14.8868
	14.9076	39.6375			14.9013	38.1757			14.9484	29.2281			14.9711	40.38			13.0173	27.9571			14.9638	29.4872			14.9629	40.7273			12.3771	27.0823			14.9527	29.5912			14.9484	38.7794			14.9389	37.571			14.9462	28.824			14.9368
	14.9576	39.6358			14.9513	38.2057			14.9984	29.246			15.0211	40.3797			13.0673	27.9176			15.0138	29.507			15.0129	40.7274			12.4271	27.0456			15.0027	29.6111			14.9984	38.7752			14.9889	37.5998			14.9962	28.8379			14.9868
	15.0076	39.6342			15.0013	38.2354			15.0484	29.2639			15.0711	40.3793			13.1173	27.878			15.0638	29.5269			15.0629	40.7275			12.4771	27.0088			15.0527	29.6311			15.0484	38.7711			15.0389	37.6285			15.0462	28.8519			15.0368
	15.0576	39.6326			15.0513	38.265			15.0984	29.2818			15.1211	40.379			13.1673	27.8386			15.1138	29.5468			15.1129	40.7276			12.5271	26.9721			15.1027	29.6511			15.0984	38.767			15.0889	37.6569			15.0962	28.8659			15.0868
	15.1076	39.6311			15.1013	38.2943			15.1484	29.2998			15.1711	40.3788			13.2173	27.7991			15.1638	29.5667			15.1629	40.7278			12.5771	26.9355			15.1527	29.6711			15.1484	38.7629			15.1389	37.6851			15.1462	28.8799			15.1368
	15.1576	39.6295			15.1513	38.3234			15.1984	29.3178			15.2211	40.3785			13.2673	27.7597			15.2138	29.5867			15.2129	40.728			12.6271	26.8988			15.2027	29.6912			15.1984	38.7589			15.1889	37.7131			15.1962	28.894			15.1868
	15.2076	39.6281			15.2013	38.3523			15.2484	29.3359			15.2711	40.3784			13.3173	27.7204			15.2638	29.6067			15.2629	40.7283			12.6771	26.8623			15.2527	29.7113			15.2484	38.755			15.2389	37.7408			15.2462	28.9082			15.2368
	15.2576	39.6267			15.2513	38.381			15.2984	29.354			15.3211	40.3782			13.3673	27.681			15.3138	29.6267			15.3129	40.7285			12.7271	26.8257			15.3027	29.7314			15.2984	38.7511			15.2889	37.7684			15.2962	28.9224			15.2868
	15.3076	39.6253			15.3013	38.4094			15.3484	29.3722			15.3711	40.3781			13.4173	27.6418			15.3638	29.6468			15.3629	40.7288			12.7771	26.7892			15.3527	29.7516			15.3484	38.7472			15.3389	37.7958			15.3462	28.9367			15.3368
	15.3576	39.6239			15.3513	38.4377			15.3984	29.3904			15.4211	40.378			13.4673	27.6025			15.4138	29.6669			15.4129	40.7292			12.8271	26.7527			15.4027	29.7718			15.3984	38.7433			15.3889	37.8229			15.3962	28.951			15.3868
	15.4076	39.6226			15.4013	38.4658			15.4484	29.4086			15.4711	40.3779			13.5173	27.5633			15.4638	29.687			15.4629	40.7295			12.8771	26.7162			15.4527	29.7921			15.4484	38.7395			15.4389	37.8499			15.4462	28.9653			15.4368
	15.4576	39.6214			15.4513	38.4937			15.4984	29.4268			15.5211	40.3779			13.5673	27.5242			15.5138	29.7072			15.5129	40.7299			12.9271	26.6798			15.5027	29.8123			15.4984	38.7358			15.4889	37.8767			15.4962	28.9797			15.4868
	15.5076	39.6201			15.5013	38.5214			15.5484	29.4451			15.5711	40.3779			13.6173	27.4851			15.5638	29.7274			15.5629	40.7303			12.9771	26.6434			15.5527	29.8326			15.5484	38.732			15.5389	37.9032			15.5462	28.9941			15.5368
	15.5576	39.619			15.5513	38.5489			15.5984	29.4634			15.6211	40.3779			13.6673	27.446			15.6138	29.7476			15.6129	40.7307			13.0271	26.6071			15.6027	29.8529			15.5984	38.7283			15.5889	37.9296			15.5962	29.0086			15.5868
	15.6076	39.6178			15.6013	38.5761			15.6484	29.4817			15.6711	40.378			13.7173	27.407			15.6638	29.7678			15.6629	40.7311			13.0771	26.5708			15.6527	29.8733			15.6484	38.7247			15.6389	37.9557			15.6462	29.0231			15.6368
	15.6576	39.6167			15.6513	38.6033			15.6984	29.5001			15.7211	40.3781			13.7673	27.368			15.7138	29.788			15.7129	40.7316			13.1271	26.5345			15.7027	29.8936			15.6984	38.7211			15.6889	37.9817			15.6962	29.0376			15.6868
	15.7076	39.6156			15.7013	38.6302			15.7484	29.5184			15.7711	40.3782			13.8173	27.329			15.7638	29.8083			15.7629	40.7321			13.1771	26.4983			15.7527	29.914			15.7484	38.7175			15.7389	38.0075			15.7462	29.0522			15.7368
	15.7576	39.6146			15.7513	38.6569			15.7984	29.5368			15.8211	40.3784			13.8673	27.2901			15.8138	29.8285			15.8129	40.7326			13.2271	26.4621			15.8027	29.9344			15.7984	38.7139			15.7889	38.0331			15.7962	29.0668			15.7868
	15.8076	39.6136			15.8013	38.6834			15.8484	29.5552			15.8711	40.3786			13.9173	27.2513			15.8638	29.8488			15.8629	40.7331			13.2771	26.4259			15.8527	29.9548			15.8484	38.7104			15.8389	38.0585			15.8462	29.0814			15.8368
	15.8576	39.6126			15.8513	38.7098			15.8984	29.5736			15.9211	40.3788			13.9673	27.2124			15.9138	29.8691			15.9129	40.7337			13.3271	26.3897			15.9027	29.9752			15.8984	38.7069			15.8889	38.0837			15.8962	29.096			15.8868
	15.9076	39.6117			15.9013	38.736			15.9484	29.5921			15.9711	40.379			14.0173	27.1737			15.9638	29.8894			15.9629	40.7342			13.3771	26.3536			15.9527	29.9956			15.9484	38.7035			15.9389	38.1087			15.9462	29.1107			15.9368
	15.9576	39.6108			15.9513	38.762			15.9984	29.6105			16.0211	40.3793			14.0673	27.1349			16.0138	29.9097			16.0129	40.7348			13.4271	26.3176			16.0027	30.016			15.9984	38.7			15.9889	38.1336			15.9962	29.1254			15.9868
	16.0076	39.6099			16.0013	38.7878			16.0484	29.629			16.0711	40.3796			14.1173	27.0962			16.0638	29.93			16.0629	40.7354			13.4771	26.2815			16.0527	30.0365			16.0484	38.6966			16.0389	38.1582			16.0462	29.1401			16.0368
	16.0576	39.609			16.0513	38.8134			16.0984	29.6474			16.1211	40.3799			14.1673	27.0575			16.1138	29.9503			16.1129	40.7361			13.5271	26.2455			16.1027	30.0569			16.0984	38.6933			16.0889	38.1827			16.0962	29.1548			16.0868
	16.1076	39.6082			16.1013	38.8389			16.1484	29.6659			16.1711	40.3802			14.2173	27.0189			16.1638	29.9706			16.1629	40.7367			13.5771	26.2096			16.1527	30.0774			16.1484	38.6899			16.1389	38.207			16.1462	29.1696			16.1368
	16.1576	39.6075			16.1513	38.8641			16.1984	29.6844			16.2211	40.3806			14.2673	26.9803			16.2138	29.9909			16.2129	40.7374			13.6271	26.1736			16.2027	30.0978			16.1984	38.6866			16.1889	38.2312			16.1962	29.1843			16.1868
	16.2076	39.6067			16.2013	38.8893			16.2484	29.7028			16.2711	40.3809			14.3173	26.9418			16.2638	30.0113			16.2629	40.7381			13.6771	26.1377			16.2527	30.1183			16.2484	38.6834			16.2389	38.2551			16.2462	29.1991			16.2368
	16.2576	39.606			16.2513	38.9142			16.2984	29.7213			16.3211	40.3814			14.3673	26.9033			16.3138	30.0316			16.3129	40.7388			13.7271	26.1019			16.3027	30.1387			16.2984	38.6801			16.2889	38.2789			16.2962	29.2139			16.2868
	16.3076	39.6053			16.3013	38.939			16.3484	29.7398			16.3711	40.3818			14.4173	26.8648			16.3638	30.0519			16.3629	40.7395			13.7771	26.066			16.3527	30.1591			16.3484	38.6769			16.3389	38.3025			16.3462	29.2287			16.3368
	16.3576	39.6046			16.3513	38.9636			16.3984	29.7583			16.4211	40.3822			14.4673	26.8264			16.4138	30.0722			16.4129	40.7402			13.8271	26.0302			16.4027	30.1796			16.3984	38.6737			16.3889	38.326			16.3962	29.2435			16.3868
	16.4076	39.604			16.4013	38.988			16.4484	29.7768			16.4711	40.3827			14.5173	26.788			16.4638	30.0925			16.4629	40.741			13.8771	25.9945			16.4527	30.2			16.4484	38.6705			16.4389	38.3492			16.4462	29.2584			16.4368
	16.4576	39.6034			16.4513	39.0123			16.4984	29.7952			16.5211	40.3832			14.5673	26.7496			16.5138	30.1128			16.5129	40.7418			13.9271	25.9587			16.5027	30.2205			16.4984	38.6674			16.4889	38.3723			16.4962	29.2732			16.4868
	16.5076	39.6028			16.5013	39.0364			16.5484	29.8137			16.5711	40.3837			14.6173	26.7113			16.5638	30.1331			16.5629	40.7426			13.9771	25.923			16.5527	30.2409			16.5484	38.6643			16.5389	38.3953			16.5462	29.288			16.5368
	16.5576	39.6023			16.5513	39.0603			16.5984	29.8322			16.6211	40.3843			14.6673	26.6731			16.6138	30.1534			16.6129	40.7434			14.0271	25.8874			16.6027	30.2613			16.5984	38.6612			16.5889	38.4181			16.5962	29.3029			16.5868
	16.6076	39.6017			16.6013	39.0841			16.6484	29.8506			16.6711	40.3848			14.7173	26.6348			16.6638	30.1736			16.6629	40.7442			14.0771	25.8518			16.6527	30.2817			16.6484	38.6581			16.6389	38.4407			16.6462	29.3177			16.6368
	16.6576	39.6012			16.6513	39.1077			16.6984	29.8691			16.7211	40.3854			14.7673	26.5967			16.7138	30.1939			16.7129	40.745			14.1271	25.8162			16.7027	30.3021			16.6984	38.6551			16.6889	38.4631			16.6962	29.3326			16.6868
	16.7076	39.6008			16.7013	39.1311			16.7484	29.8876			16.7711	40.386			14.8173	26.5585			16.7638	30.2141			16.7629	40.7459			14.1771	25.7806			16.7527	30.3225			16.7484	38.6521			16.7389	38.4854			16.7462	29.3474			16.7368
	16.7576	39.6003			16.7513	39.1544			16.7984	29.906			16.8211	40.3866			14.8673	26.5204			16.8138	30.2344			16.8129	40.7467			14.2271	25.7451			16.8027	30.3429			16.7984	38.6491			16.7889	38.5075			16.7962	29.3622			16.7868
	16.8076	39.5999			16.8013	39.1776			16.8484	29.9244			16.8711	40.3872			14.9173	26.4823			16.8638	30.2546			16.8629	40.7476			14.2771	25.7096			16.8527	30.3632			16.8484	38.6461			16.8389	38.5295			16.8462	29.3771			16.8368
	16.8576	39.5995			16.8513	39.2006			16.8984	29.9428			16.9211	40.3879			14.9673	26.4443			16.9138	30.2748			16.9129	40.7485			14.3271	25.6741			16.9027	30.3836			16.8984	38.6432			16.8889	38.5513			16.8962	29.3919			16.8868
	16.9076	39.5991			16.9013	39.2234			16.9484	29.9612			16.9711	40.3885			15.0173	26.4063			16.9638	30.2949			16.9629	40.7494			14.3771	25.6387			16.9527	30.4039			16.9484	38.6402			16.9389	38.573			16.9462	29.4068			16.9368
	16.9576	39.5987			16.9513	39.2461			16.9984	29.9796			17.0211	40.3892			15.0673	26.3683			17.0138	30.3151			17.0129	40.7503			14.4271	25.6033			17.0027	30.4242			16.9984	38.6373			16.9889	38.5945			16.9962	29.4216			16.9868
	17.0076	39.5984			17.0013	39.2686			17.0484	29.998			17.0711	40.3899			15.1173	26.3304			17.0638	30.3353			17.0629	40.7512			14.4771	25.5679			17.0527	30.4445			17.0484	38.6344			17.0389	38.6159			17.0462	29.4364			17.0368
	17.0576	39.598			17.0513	39.291			17.0984	30.0163			17.1211	40.3906			15.1673	26.2925			17.1138	30.3554			17.1129	40.7522			14.5271	25.5326			17.1027	30.4648			17.0984	38.6316			17.0889	38.6371			17.0962	29.4513			17.0868
	17.1076	39.5977			17.1013	39.3132			17.1484	30.0347			17.1711	40.3914			15.2173	26.2547			17.1638	30.3755			17.1629	40.7531			14.5771	25.4973			17.1527	30.4851			17.1484	38.6287			17.1389	38.6581			17.1462	29.4661			17.1368
	17.1576	39.5975			17.1513	39.3353			17.1984	30.053			17.2211	40.3921			15.2673	26.2169			17.2138	30.3956			17.2129	40.7541			14.6271	25.4621			17.2027	30.5053			17.1984	38.6259			17.1889	38.679			17.1962	29.4809			17.1868
	17.2076	39.5972			17.2013	39.3572			17.2484	30.0713			17.2711	40.3929			15.3173	26.1791			17.2638	30.4156			17.2629	40.755			14.6771	25.4268			17.2527	30.5255			17.2484	38.6231			17.2389	38.6998			17.2462	29.4957			17.2368
	17.2576	39.597			17.2513	39.379			17.2984	30.0896			17.3211	40.3936			15.3673	26.1414			17.3138	30.4357			17.3129	40.756			14.7271	25.3916			17.3027	30.5457			17.2984	38.6203			17.2889	38.7204			17.2962	29.5105			17.2868
	17.3076	39.5967			17.3013	39.4007			17.3484	30.1078			17.3711	40.3944			15.4173	26.1037			17.3638	30.4557			17.3629	40.757			14.7771	25.3565			17.3527	30.5659			17.3484	38.6175			17.3389	38.7409			17.3462	29.5253			17.3368
	17.3576	39.5965			17.3513	39.4222			17.3984	30.1261			17.4211	40.3952			15.4673	26.0661			17.4138	30.4756			17.4129	40.758			14.8271	25.3213			17.4027	30.586			17.3984	38.6148			17.3889	38.7612			17.3962	29.54			17.3868
	17.4076	39.5963			17.4013	39.4435			17.4484	30.1443			17.4711	40.396			15.5173	26.0285			17.4638	30.4956			17.4629	40.759			14.8771	25.2862			17.4527	30.6061			17.4484	38.612			17.4389	38.7814			17.4462	29.5548			17.4368
	17.4576	39.5961			17.4513	39.4647			17.4984	30.1625			17.5211	40.3968			15.5673	25.9909			17.5138	30.5155			17.5129	40.76			14.9271	25.2512			17.5027	30.6262			17.4984	38.6093			17.4889	38.8014			17.4962	29.5695			17.4868
	17.5076	39.596			17.5013	39.4858			17.5484	30.1807			17.5711	40.3977			15.6173	25.9534			17.5638	30.5354			17.5629	40.761			14.9771	25.2162			17.5527	30.6463			17.5484	38.6066			17.5389	38.8213			17.5462	29.5842			17.5368
	17.5576	39.5958			17.5513	39.5068			17.5984	30.1988			17.6211	40.3985			15.6673	25.9159			17.6138	30.5553			17.6129	40.762			15.0271	25.1812			17.6027	30.6663			17.5984	38.6039			17.5889	38.8411			17.5962	29.5989			17.5868
	17.6076	39.5957			17.6013	39.5275			17.6484	30.2169			17.6711	40.3994			15.7173	25.8784			17.6638	30.5751			17.6629	40.7631			15.0771	25.1462			17.6527	30.6863			17.6484	38.6013			17.6389	38.8607			17.6462	29.6136			17.6368
	17.6576	39.5956			17.6513	39.5482			17.6984	30.235			17.7211	40.4002			15.7673	25.841			17.7138	30.595			17.7129	40.7641			15.1271	25.1113			17.7027	30.7063			17.6984	38.5986			17.6889	38.8802			17.6962	29.6283			17.6868
	17.7076	39.5955			17.7013	39.5687			17.7484	30.2531			17.7711	40.4011			15.8173	25.8036			17.7638	30.6147			17.7629	40.7652			15.1771	25.0764			17.7527	30.7262			17.7484	38.596			17.7389	38.8995			17.7462	29.6429			17.7368
	17.7576	39.5954			17.7513	39.5891			17.7984	30.2711			17.8211	40.402			15.8673	25.7663			17.8138	30.6345			17.8129	40.7662			15.2271	25.0415			17.8027	30.7461			17.7984	38.5933			17.7889	38.9187			17.7962	29.6576			17.7868
	17.8076	39.5953			17.8013	39.6094			17.8484	30.2891			17.8711	40.4029			15.9173	25.729			17.8638	30.6542			17.8629	40.7673			15.2771	25.0067			17.8527	30.766			17.8484	38.5907			17.8389	38.9378			17.8462	29.6722			17.8368
	17.8576	39.5953			17.8513	39.6295			17.8984	30.3071			17.9211	40.4038			15.9673	25.6917			17.9138	30.6739			17.9129	40.7683			15.3271	24.9718			17.9027	30.7859			17.8984	38.5881			17.8889	38.9568			17.8962	29.6868			17.8868
	17.9076	39.5952			17.9013	39.6495			17.9484	30.325			17.9711	40.4047			16.0173	25.6545			17.9638	30.6935			17.9629	40.7694			15.3771	24.9371			17.9527	30.8057			17.9484	38.5855			17.9389	38.9756			17.9462	29.7013			17.9368
	17.9576	39.5952			17.9513	39.6694			17.9984	30.343			18.0211	40.4056			16.0673	25.6173			18.0138	30.7131			18.0129	40.7705			15.4271	24.9023			18.0027	30.8255			17.9984	38.5829			17.9889	38.9942			17.9962	29.7159			17.9868
	18.0076	39.5952			18.0013	39.6891			18.0484	30.3608			18.0711	40.4065			16.1173	25.5801			18.0638	30.7327			18.0629	40.7716			15.4771	24.8676			18.0527	30.8452			18.0484	38.5804			18.0389	39.0128			18.0462	29.7304			18.0368
	18.0576	39.5952			18.0513	39.7087			18.0984	30.3787			18.1211	40.4075			16.1673	25.543			18.1138	30.7523			18.1129	40.7726			15.5271	24.833			18.1027	30.8649			18.0984	38.5778			18.0889	39.0312			18.0962	29.7449			18.0868
	18.1076	39.5952			18.1013	39.7282			18.1484	30.3965			18.1711	40.4084			16.2173	25.5059			18.1638	30.7718			18.1629	40.7737			15.5771	24.7983			18.1527	30.8846			18.1484	38.5753			18.1389	39.0495			18.1462	29.7594			18.1368
	18.1576	39.5952			18.1513	39.7475			18.1984	30.4143			18.2211	40.4094			16.2673	25.4689			18.2138	30.7912			18.2129	40.7748			15.6271	24.7637			18.2027	30.9042			18.1984	38.5727			18.1889	39.0677			18.1962	29.7738			18.1868
	18.2076	39.5952			18.2013	39.7667			18.2484	30.4321			18.2711	40.4103			16.3173	25.4319			18.2638	30.8107			18.2629	40.7759			15.6771	24.7291			18.2527	30.9239			18.2484	38.5702			18.2389	39.0857			18.2462	29.7883			18.2368
	18.2576	39.5952			18.2513	39.7858			18.2984	30.4498			18.3211	40.4113			16.3673	25.3949			18.3138	30.8301			18.3129	40.777			15.7271	24.6946			18.3027	30.9434			18.2984	38.5677			18.2889	39.1036			18.2962	29.8027			18.2868
	18.3076	39.5953			18.3013	39.8048			18.3484	30.4675			18.3711	40.4122			16.4173	25.358			18.3638	30.8494			18.3629	40.7781			15.7771	24.6601			18.3527	30.963			18.3484	38.5652			18.3389	39.1214			18.3462	29.817			18.3368
	18.3576	39.5953			18.3513	39.8236			18.3984	30.4851			18.4211	40.4132			16.4673	25.3211			18.4138	30.8687			18.4129	40.7792			15.8271	24.6256			18.4027	30.9824			18.3984	38.5627			18.3889	39.1391			18.3962	29.8314			18.3868
	18.4076	39.5954			18.4013	39.8423			18.4484	30.5027			18.4711	40.4142			16.5173	25.2842			18.4638	30.888			18.4629	40.7803			15.8771	24.5911			18.4527	31.0019			18.4484	38.5602			18.4389	39.1566			18.4462	29.8457			18.4368
	18.4576	39.5954			18.4513	39.8609			18.4984	30.5203			18.5211	40.4151			16.5673	25.2474			18.5138	30.9073			18.5129	40.7814			15.9271	24.5567			18.5027	31.0213			18.4984	38.5577			18.4889	39.174			18.4962	29.86			18.4868
	18.5076	39.5955			18.5013	39.8794			18.5484	30.5378			18.5711	40.4161			16.6173	25.2106			18.5638	30.9264			18.5629	40.7825			15.9771	24.5223			18.5527	31.0407			18.5484	38.5553			18.5389	39.1913			18.5462	29.8742			18.5368
	18.5576	39.5956			18.5513	39.8978			18.5984	30.5553			18.6211	40.4171			16.6673	25.1739			18.6138	30.9456			18.6129	40.7836			16.0271	24.488			18.6027	31.06			18.5984	38.5528			18.5889	39.2085			18.5962	29.8885			18.5868
	18.6076	39.5957			18.6013	39.916			18.6484	30.5728			18.6711	40.4181			16.7173	25.1372			18.6638	30.9647			18.6629	40.7847			16.0771	24.4537			18.6527	31.0793			18.6484	38.5504			18.6389	39.2255			18.6462	29.9027			18.6368
	18.6576	39.5958			18.6513	39.9341			18.6984	30.5902			18.7211	40.4191			16.7673	25.1005			18.7138	30.9838			18.7129	40.7859			16.1271	24.4194			18.7027	31.0986			18.6984	38.5479			18.6889	39.2425			18.6962	29.9168			18.6868
	18.7076	39.5959			18.7013	39.9521			18.7484	30.6076			18.7711	40.4201			16.8173	25.0638			18.7638	31.0028			18.7629	40.787			16.1771	24.3851			18.7527	31.1178			18.7484	38.5455			18.7389	39.2593			18.7462	29.931			18.7368
	18.7576	39.596			18.7513	39.97			18.7984	30.6249			18.8211	40.4211			16.8673	25.0272			18.8138	31.0218			18.8129	40.7881			16.2271	24.3509			18.8027	31.1369			18.7984	38.543			18.7889	39.276			18.7962	29.9451			18.7868
	18.8076	39.5961			18.8013	39.9877			18.8484	30.6422			18.8711	40.4221			16.9173	24.9907			18.8638	31.0407			18.8629	40.7892			16.2771	24.3167			18.8527	31.1561			18.8484	38.5406			18.8389	39.2926			18.8462	29.9591			18.8368
	18.8576	39.5962			18.8513	40.0054			18.8984	30.6595			18.9211	40.4231			16.9673	24.9541			18.9138	31.0596			18.9129	40.7903			16.3271	24.2825			18.9027	31.1751			18.8984	38.5382			18.8889	39.309			18.8962	29.9732			18.8868
	18.9076	39.5963			18.9013	40.0229			18.9484	30.6767			18.9711	40.4241			17.0173	24.9177			18.9638	31.0785			18.9629	40.7914			16.3771	24.2484			18.9527	31.1942			18.9484	38.5358			18.9389	39.3254			18.9462	29.9872			18.9368
	18.9576	39.5964			18.9513	40.0403			18.9984	30.6939			19.0211	40.4251			17.0673	24.8812			19.0138	31.0973			19.0129	40.7925			16.4271	24.2143			19.0027	31.2132			18.9984	38.5334			18.9889	39.3416			18.9962	30.0012			18.9868
	19.0076	39.5965			19.0013	40.0576			19.0484	30.711			19.0711	40.4261			17.1173	24.8448			19.0638	31.1161			19.0629	40.7936			16.4771	24.1802			19.0527	31.2321			19.0484	38.531			19.0389	39.3577			19.0462	30.0151			19.0368
	19.0576	39.5967			19.0513	40.0748			19.0984	30.7281			19.1211	40.4271			17.1673	24.8084			19.1138	31.1348			19.1129	40.7947			16.5271	24.1462			19.1027	31.251			19.0984	38.5286			19.0889	39.3738			19.0962	30.029			19.0868
	19.1076	39.5968			19.1013	40.0919			19.1484	30.7452			19.1711	40.4281			17.2173	24.7721			19.1638	31.1535			19.1629	40.7958			16.5771	24.1122			19.1527	31.2699			19.1484	38.5262			19.1389	39.3897			19.1462	30.0429			19.1368
	19.1576	39.5969			19.1513	40.1089			19.1984	30.7622			19.2211	40.4291			17.2673	24.7357			19.2138	31.1721			19.2129	40.7969			16.6271	24.0782			19.2027	31.2887			19.1984	38.5238			19.1889	39.4054			19.1962	30.0567			19.1868
	19.2076	39.5971			19.2013	40.1257			19.2484	30.7791			19.2711	40.4301			17.3173	24.6995			19.2638	31.1907			19.2629	40.798			16.6771	24.0442			19.2527	31.3075			19.2484	38.5214			19.2389	39.4211			19.2462	30.0705			19.2368
	19.2576	39.5972			19.2513	40.1425			19.2984	30.7961			19.3211	40.4311			17.3673	24.6632			19.3138	31.2092			19.3129	40.7991			16.7271	24.0103			19.3027	31.3262			19.2984	38.519			19.2889	39.4367			19.2962	30.0843			19.2868
	19.3076	39.5974			19.3013	40.1591			19.3484	30.8129			19.3711	40.4321			17.4173	24.627			19.3638	31.2277			19.3629	40.8002			16.7771	23.9764			19.3527	31.3449			19.3484	38.5166			19.3389	39.4522			19.3462	30.098			19.3368
	19.3576	39.5975			19.3513	40.1756			19.3984	30.8298			19.4211	40.4331			17.4673	24.5909			19.4138	31.2461			19.4129	40.8013			16.8271	23.9426			19.4027	31.3635			19.3984	38.5142			19.3889	39.4675			19.3962	30.1117			19.3868
	19.4076	39.5977			19.4013	40.1921			19.4484	30.8466			19.4711	40.4341			17.5173	24.5547			19.4638	31.2645			19.4629	40.8023			16.8771	23.9087			19.4527	31.3821			19.4484	38.5119			19.4389	39.4828			19.4462	30.1253			19.4368
	19.4576	39.5978			19.4513	40.2084			19.4984	30.8633			19.5211	40.4351			17.5673	24.5186			19.5138	31.2829			19.5129	40.8034			16.9271	23.875			19.5027	31.4006			19.4984	38.5095			19.4889	39.4979			19.4962	30.1389			19.4868
	19.5076	39.598			19.5013	40.2246			19.5484	30.88			19.5711	40.4361			17.6173	24.4826			19.5638	31.3011			19.5629	40.8045			16.9771	23.8412			19.5527	31.4191			19.5484	38.5071			19.5389	39.5129			19.5462	30.1525			19.5368
	19.5576	39.5981			19.5513	40.2407			19.5984	30.8967			19.6211	40.4371			17.6673	24.4466			19.6138	31.3194			19.6129	40.8056			17.0271	23.8075			19.6027	31.4375			19.5984	38.5047			19.5889	39.5279			19.5962	30.166			19.5868
	19.6076	39.5983			19.6013	40.2567			19.6484	30.9133			19.6711	40.4381			17.7173	24.4106			19.6638	31.3376			19.6629	40.8066			17.0771	23.7738			19.6527	31.4559			19.6484	38.5024			19.6389	39.5427			19.6462	30.1795			19.6368
	19.6576	39.5984			19.6513	40.2726			19.6984	30.9299			19.7211	40.4391			17.7673	24.3746			19.7138	31.3557			19.7129	40.8077			17.1271	23.7401			19.7027	31.4743			19.6984	38.5			19.6889	39.5574			19.6962	30.193			19.6868
	19.7076	39.5986			19.7013	40.2883			19.7484	30.9464			19.7711	40.4401			17.8173	24.3387			19.7638	31.3738			19.7629	40.8087			17.1771	23.7064			19.7527	31.4926			19.7484	38.4976			19.7389	39.572			19.7462	30.2064			19.7368
	19.7576	39.5987			19.7513	40.304			19.7984	30.9628			19.8211	40.4411			17.8673	24.3028			19.8138	31.3919			19.8129	40.8098			17.2271	23.6728			19.8027	31.5108			19.7984	38.4953			19.7889	39.5865			19.7962	30.2198			19.7868
	19.8076	39.5988			19.8013	40.3196			19.8484	30.9793			19.8711	40.4421			17.9173	24.267			19.8638	31.4099			19.8629	40.8108			17.2771	23.6393			19.8527	31.529			19.8484	38.4929			19.8389	39.6009			19.8462	30.2331			19.8368
	19.8576	39.599			19.8513	40.3351			19.8984	30.9956			19.9211	40.4431			17.9673	24.2312			19.9138	31.4278			19.9129	40.8119			17.3271	23.6057			19.9027	31.5472			19.8984	38.4905			19.8889	39.6152			19.8962	30.2464			19.8868
	19.9076	39.5991			19.9013	40.3505			19.9484	31.012			19.9711	40.444			18.0173	24.1954			19.9638	31.4457			19.9629	40.8129			17.3771	23.5722			19.9527	31.5653			19.9484	38.4882			19.9389	39.6295			19.9462	30.2597			19.9368
	19.9576	39.5993			19.9513	40.3657			19.9984	31.0283			20.0211	40.445			18.0673	24.1596			20.0138	31.4636			20.0129	40.8139			17.4271	23.5387			20.0027	31.5833			19.9984	38.4858			19.9889	39.6436			19.9962	30.2729			19.9868
	20.0076	39.5994			20.0013	40.3809			20.0484	31.0445			20.0711	40.446			18.1173	24.1239			20.0638	31.4814			20.0629	40.815			17.4771	23.5053			20.0527	31.6013			20.0484	38.4834			20.0389	39.6576			20.0462	30.2861			20.0368
	20.0576	39.5996			20.0513	40.396			20.0984	31.0607			20.1211	40.4469			18.1673	24.0883			20.1138	31.4991			20.1129	40.816			17.5271	23.4718			20.1027	31.6193			20.0984	38.481			20.0889	39.6715			20.0962	30.2992			20.0868
	20.1076	39.5997			20.1013	40.411			20.1484	31.0768			20.1711	40.4479			18.2173	24.0526			20.1638	31.5168			20.1629	40.817			17.5771	23.4384			20.1527	31.6372			20.1484	38.4787			20.1389	39.6853			20.1462	30.3123			20.1368
	20.1576	39.5998			20.1513	40.4258			20.1984	31.0929			20.2211	40.4488			18.2673	24.017			20.2138	31.5345			20.2129	40.818			17.6271	23.4051			20.2027	31.655			20.1984	38.4763			20.1889	39.699			20.1962	30.3254			20.1868
	20.2076	39.5999			20.2013	40.4406			20.2484	31.109			20.2711	40.4498			18.3173	23.9815			20.2638	31.5521			20.2629	40.819			17.6771	23.3717			20.2527	31.6728			20.2484	38.4739			20.2389	39.7126			20.2462	30.3384			20.2368
	20.2576	39.6001			20.2513	40.4553			20.2984	31.125			20.3211	40.4507			18.3673	23.9459			20.3138	31.5696			20.3129	40.82			17.7271	23.3384			20.3027	31.6905			20.2984	38.4715			20.2889	39.7262			20.2962	30.3514			20.2868
	20.3076	39.6002			20.3013	40.4699			20.3484	31.1409			20.3711	40.4516			18.4173	23.9104			20.3638	31.5871			20.3629	40.8209			17.7771	23.3051			20.3527	31.7082			20.3484	38.4692			20.3389	39.7396			20.3462	30.3643			20.3368
	20.3576	39.6003			20.3513	40.4844			20.3984	31.1568			20.4211	40.4526			18.4673	23.875			20.4138	31.6046			20.4129	40.8219			17.8271	23.2719			20.4027	31.7259			20.3984	38.4668			20.3889	39.7529			20.3962	30.3772			20.3868
	20.4076	39.6004			20.4013	40.4988			20.4484	31.1726			20.4711	40.4535			18.5173	23.8395			20.4638	31.622			20.4629	40.8229			17.8771	23.2387			20.4527	31.7435			20.4484	38.4644			20.4389	39.7661			20.4462	30.39			20.4368
	20.4576	39.6005			20.4513	40.5131			20.4984	31.1884			20.5211	40.4544			18.5673	23.8041			20.5138	31.6393			20.5129	40.8238			17.9271	23.2055			20.5027	31.761			20.4984	38.462			20.4889	39.7793			20.4962	30.4028			20.4868
	20.5076	39.6006			20.5013	40.5273			20.5484	31.2042			20.5711	40.4553			18.6173	23.7688			20.5638	31.6566			20.5629	40.8248			17.9771	23.1723			20.5527	31.7785			20.5484	38.4596			20.5389	39.7923			20.5462	30.4156			20.5368
	20.5576	39.6007			20.5513	40.5414			20.5984	31.2199			20.6211	40.4562			18.6673	23.7335			20.6138	31.6738			20.6129	40.8257			18.0271	23.1392			20.6027	31.7959			20.5984	38.4572			20.5889	39.8053			20.5962	30.4283			20.5868
	20.6076	39.6008			20.6013	40.5554			20.6484	31.2355			20.6711	40.4571			18.7173	23.6982			20.6638	31.691			20.6629	40.8267			18.0771	23.1061			20.6527	31.8133			20.6484	38.4548			20.6389	39.8182			20.6462	30.4409			20.6368
	20.6576	39.6009			20.6513	40.5693			20.6984	31.2511			20.7211	40.458			18.7673	23.6629			20.7138	31.7081			20.7129	40.8276			18.1271	23.073			20.7027	31.8307			20.6984	38.4524			20.6889	39.8309			20.6962	30.4536			20.6868
	20.7076	39.601			20.7013	40.5831			20.7484	31.2667			20.7711	40.4588			18.8173	23.6277			20.7638	31.7252			20.7629	40.8285			18.1771	23.04			20.7527	31.8479			20.7484	38.45			20.7389	39.8436			20.7462	30.4662			20.7368
	20.7576	39.6011			20.7513	40.5969			20.7984	31.2822			20.8211	40.4597			18.8673	23.5925			20.8138	31.7422			20.8129	40.8294			18.2271	23.007			20.8027	31.8652			20.7984	38.4476			20.7889	39.8562			20.7962	30.4787			20.7868
	20.8076	39.6012			20.8013	40.6105			20.8484	31.2976			20.8711	40.4606			18.9173	23.5574			20.8638	31.7592			20.8629	40.8303			18.2771	22.974			20.8527	31.8824			20.8484	38.4452			20.8389	39.8687			20.8462	30.4912			20.8368
	20.8576	39.6012			20.8513	40.6241			20.8984	31.313			20.9211	40.4614			18.9673	23.5222			20.9138	31.7761			20.9129	40.8312			18.3271	22.9411			20.9027	31.8995			20.8984	38.4427			20.8889	39.8811			20.8962	30.5036			20.8868
	20.9076	39.6013			20.9013	40.6376			20.9484	31.3284			20.9711	40.4623			19.0173	23.4871			20.9638	31.793			20.9629	40.832			18.3771	22.9081			20.9527	31.9165			20.9484	38.4403			20.9389	39.8934			20.9462	30.516			20.9368
	20.9576	39.6013			20.9513	40.6509			20.9984	31.3437			21.0211	40.4631			19.0673	23.4521			21.0138	31.8098			21.0129	40.8329			18.4271	22.8753			21.0027	31.9336			20.9984	38.4379			20.9889	39.9057			20.9962	30.5284			20.9868
	21.0076	39.6014			21.0013	40.6642			21.0484	31.3589			21.0711	40.4639			19.1173	23.4171			21.0638	31.8265			21.0629	40.8338			18.4771	22.8424			21.0527	31.9505			21.0484	38.4355			21.0389	39.9178			21.0462	30.5407			21.0368
	21.0576	39.6014			21.0513	40.6774			21.0984	31.3741			21.1211	40.4647			19.1673	23.3821			21.1138	31.8432			21.1129	40.8346			18.5271	22.8096			21.1027	31.9674			21.0984	38.433			21.0889	39.9299			21.0962	30.553			21.0868
	21.1076	39.6014			21.1013	40.6905			21.1484	31.3893			21.1711	40.4656			19.2173	23.3471			21.1638	31.8599			21.1629	40.8354			18.5771	22.7768			21.1527	31.9843			21.1484	38.4306			21.1389	39.9418			21.1462	30.5652			21.1368
	21.1576	39.6015			21.1513	40.7035			21.1984	31.4044			21.2211	40.4664			19.2673	23.3122			21.2138	31.8765			21.2129	40.8363			18.6271	22.744			21.2027	32.0011			21.1984	38.4281			21.1889	39.9537			21.1962	30.5774			21.1868
	21.2076	39.6015			21.2013	40.7165			21.2484	31.4194			21.2711	40.4671			19.3173	23.2773			21.2638	31.893			21.2629	40.8371			18.6771	22.7112			21.2527	32.0179			21.2484	38.4256			21.2389	39.9655			21.2462	30.5895			21.2368
	21.2576	39.6015			21.2513	40.7293			21.2984	31.4344			21.3211	40.4679			19.3673	23.2425			21.3138	31.9095			21.3129	40.8379			18.7271	22.6785			21.3027	32.0346			21.2984	38.4232			21.2889	39.9772			21.2962	30.6016			21.2868
	21.3076	39.6015			21.3013	40.7421			21.3484	31.4494			21.3711	40.4687			19.4173	23.2077			21.3638	31.926			21.3629	40.8387			18.7771	22.6458			21.3527	32.0512			21.3484	38.4207			21.3389	39.9889			21.3462	30.6137			21.3368
	21.3576	39.6015			21.3513	40.7548			21.3984	31.4643			21.4211	40.4694			19.4673	23.1729			21.4138	31.9423			21.4129	40.8394			18.8271	22.6132			21.4027	32.0678			21.3984	38.4182			21.3889	40.0004			21.3962	30.6257			21.3868
	21.4076	39.6015			21.4013	40.7674			21.4484	31.4791			21.4711	40.4702			19.5173	23.1381			21.4638	31.9587			21.4629	40.8402			18.8771	22.5805			21.4527	32.0844			21.4484	38.4157			21.4389	40.0119			21.4462	30.6376			21.4368
	21.4576	39.6014			21.4513	40.7799			21.4984	31.4939			21.5211	40.4709			19.5673	23.1034			21.5138	31.9749			21.5129	40.841			18.9271	22.5479			21.5027	32.1009			21.4984	38.4133			21.4889	40.0233			21.4962	30.6495			21.4868
	21.5076	39.6014			21.5013	40.7923			21.5484	31.5086			21.5711	40.4717			19.6173	23.0687			21.5638	31.9912			21.5629	40.8417			18.9771	22.5154			21.5527	32.1173			21.5484	38.4108			21.5389	40.0345			21.5462	30.6614			21.5368
	21.5576	39.6014			21.5513	40.8046			21.5984	31.5233			21.6211	40.4724			19.6673	23.0341			21.6138	32.0073			21.6129	40.8424			19.0271	22.4828			21.6027	32.1337			21.5984	38.4082			21.5889	40.0458			21.5962	30.6732			21.5868
	21.6076	39.6013			21.6013	40.8169			21.6484	31.538			21.6711	40.4731			19.7173	22.9995			21.6638	32.0235			21.6629	40.8432			19.0771	22.4503			21.6527	32.15			21.6484	38.4057			21.6389	40.0569			21.6462	30.685			21.6368
	21.6576	39.6012			21.6513	40.8291			21.6984	31.5525			21.7211	40.4738			19.7673	22.9649			21.7138	32.0395			21.7129	40.8439			19.1271	22.4178			21.7027	32.1663			21.6984	38.4032			21.6889	40.0679			21.6962	30.6967			21.6868
	21.7076	39.6012			21.7013	40.8411			21.7484	31.5671			21.7711	40.4745			19.8173	22.9304			21.7638	32.0555			21.7629	40.8446			19.1771	22.3854			21.7527	32.1825			21.7484	38.4007			21.7389	40.0789			21.7462	30.7084			21.7368
	21.7576	39.6011			21.7513	40.8531			21.7984	31.5816			21.8211	40.4751			19.8673	22.8958			21.8138	32.0715			21.8129	40.8453			19.2271	22.353			21.8027	32.1987			21.7984	38.3981			21.7889	40.0898			21.7962	30.72			21.7868
	21.8076	39.601			21.8013	40.8651			21.8484	31.596			21.8711	40.4758			19.9173	22.8614			21.8638	32.0874			21.8629	40.8459			19.2771	22.3206			21.8527	32.2148			21.8484	38.3956			21.8389	40.1006			21.8462	30.7316			21.8368
	21.8576	39.6009			21.8513	40.8769			21.8984	31.6104			21.9211	40.4765			19.9673	22.8269			21.9138	32.1032			21.9129	40.8466			19.3271	22.2882			21.9027	32.2309			21.8984	38.393			21.8889	40.1113			21.8962	30.7432			21.8868
	21.9076	39.6008			21.9013	40.8887			21.9484	31.6247			21.9711	40.4771			20.0173	22.7925			21.9638	32.119			21.9629	40.8472			19.3771	22.2558			21.9527	32.2469			21.9484	38.3905			21.9389	40.122			21.9462	30.7547			21.9368
	21.9576	39.6007			21.9513	40.9004			21.9984	31.639			22.0211	40.4777			20.0673	22.7581			22.0138	32.1348			22.0129	40.8479			19.4271	22.2235			22.0027	32.2628			21.9984	38.3879			21.9889	40.1325			21.9962	30.7661			21.9868
	22.0076	39.6005			22.0013	40.912			22.0484	31.6532			22.0711	40.4783			20.1173	22.7237			22.0638	32.1504			22.0629	40.8485			19.4771	22.1913			22.0527	32.2787			22.0484	38.3853			22.0389	40.143			22.0462	30.7775			22.0368
	22.0576	39.6004			22.0513	40.9235			22.0984	31.6674			22.1211	40.4789			20.1673	22.6894			22.1138	32.1661			22.1129	40.8491			19.5271	22.159			22.1027	32.2946			22.0984	38.3827			22.0889	40.1534			22.0962	30.7889			22.0868
	22.1076	39.6002			22.1013	40.9349			22.1484	31.6815			22.1711	40.4795			20.2173	22.6551			22.1638	32.1816			22.1629	40.8497			19.5771	22.1268			22.1527	32.3104			22.1484	38.3801			22.1389	40.1638			22.1462	30.8002			22.1368
	22.1576	39.6001			22.1513	40.9463			22.1984	31.6956			22.2211	40.4801			20.2673	22.6209			22.2138	32.1972			22.2129	40.8503			19.6271	22.0946			22.2027	32.3261			22.1984	38.3775			22.1889	40.174			22.1962	30.8115			22.1868
	22.2076	39.5999			22.2013	40.9576			22.2484	31.7096			22.2711	40.4807			20.3173	22.5867			22.2638	32.2126			22.2629	40.8508			19.6771	22.0624			22.2527	32.3418			22.2484	38.3749			22.2389	40.1842			22.2462	30.8227			22.2368
	22.2576	39.5997			22.2513	40.9688			22.2984	31.7236			22.3211	40.4812			20.3673	22.5525			22.3138	32.2281			22.3129	40.8514			19.7271	22.0303			22.3027	32.3574			22.2984	38.3723			22.2889	40.1943			22.2962	30.8339			22.2868
	22.3076	39.5995			22.3013	40.9799			22.3484	31.7375			22.3711	40.4818			20.4173	22.5183			22.3638	32.2434			22.3629	40.8519			19.7771	21.9981			22.3527	32.373			22.3484	38.3697			22.3389	40.2043			22.3462	30.845			22.3368
	22.3576	39.5993			22.3513	40.991			22.3984	31.7513			22.4211	40.4823			20.4673	22.4842			22.4138	32.2587			22.4129	40.8525			19.8271	21.9661			22.4027	32.3885			22.3984	38.367			22.3889	40.2143			22.3962	30.8561			22.3868
	22.4076	39.5991			22.4013	41.002			22.4484	31.7652			22.4711	40.4828			20.5173	22.4501			22.4638	32.274			22.4629	40.853			19.8771	21.934			22.4527	32.404			22.4484	38.3644			22.4389	40.2242			22.4462	30.8671			22.4368
	22.4576	39.5989			22.4513	41.0129			22.4984	31.7789			22.5211	40.4833			20.5673	22.416			22.5138	32.2892			22.5129	40.8535			19.9271	21.902			22.5027	32.4194			22.4984	38.3617			22.4889	40.234			22.4962	30.8781			22.4868
	22.5076	39.5986			22.5013	41.0237			22.5484	31.7926			22.5711	40.4838			20.6173	22.382			22.5638	32.3043			22.5629	40.854			19.9771	21.87			22.5527	32.4348			22.5484	38.359			22.5389	40.2437			22.5462	30.889			22.5368
	22.5576	39.5984			22.5513	41.0344			22.5984	31.8063			22.6211	40.4843			20.6673	22.348			22.6138	32.3194			22.6129	40.8544			20.0271	21.838			22.6027	32.4501			22.5984	38.3564			22.5889	40.2534			22.5962	30.8999			22.5868
	22.6076	39.5981			22.6013	41.0451			22.6484	31.8199			22.6711	40.4847			20.7173	22.3141			22.6638	32.3345			22.6629	40.8549			20.0771	21.806			22.6527	32.4654			22.6484	38.3537			22.6389	40.2629			22.6462	30.9108			22.6368
	22.6576	39.5978			22.6513	41.0557			22.6984	31.8335			22.7211	40.4852			20.7673	22.2801			22.7138	32.3494			22.7129	40.8554			20.1271	21.7741			22.7027	32.4806			22.6984	38.351			22.6889	40.2725			22.6962	30.9216			22.6868
	22.7076	39.5975			22.7013	41.0662			22.7484	31.847			22.7711	40.4856			20.8173	22.2462			22.7638	32.3644			22.7629	40.8558			20.1771	21.7422			22.7527	32.4957			22.7484	38.3482			22.7389	40.2819			22.7462	30.9323			22.7368
	22.7576	39.5972			22.7513	41.0767			22.7984	31.8604			22.8211	40.486			20.8673	22.2124			22.8138	32.3792			22.8129	40.8562			20.2271	21.7104			22.8027	32.5108			22.7984	38.3455			22.7889	40.2913			22.7962	30.943			22.7868
	22.8076	39.5969			22.8013	41.0871			22.8484	31.8738			22.8711	40.4865			20.9173	22.1785			22.8638	32.3941			22.8629	40.8566			20.2771	21.6785			22.8527	32.5259			22.8484	38.3428			22.8389	40.3006			22.8462	30.9537			22.8368
	22.8576	39.5966			22.8513	41.0974			22.8984	31.8872			22.9211	40.4868			20.9673	22.1447			22.9138	32.4088			22.9129	40.857			20.3271	21.6467			22.9027	32.5409			22.8984	38.34			22.8889	40.3098			22.8962	30.9643			22.8868
	22.9076	39.5962			22.9013	41.1076			22.9484	31.9005			22.9711	40.4872			21.0173	22.1109			22.9638	32.4236			22.9629	40.8574			20.3771	21.6149			22.9527	32.5558			22.9484	38.3373			22.9389	40.3189			22.9462	30.9749			22.9368
	22.9576	39.5959			22.9513	41.1178			22.9984	31.9137			23.0211	40.4876			21.0673	22.0772			23.0138	32.4382			23.0129	40.8577			20.4271	21.5832			23.0027	32.5707			22.9984	38.3345			22.9889	40.328			22.9962	30.9854			22.9868
	23.0076	39.5955			23.0013	41.1279			23.0484	31.9269			23.0711	40.4879			21.1173	22.0435			23.0638	32.4528			23.0629	40.858			20.4771	21.5515			23.0527	32.5856			23.0484	38.3317			23.0389	40.337			23.0462	30.9958			23.0368
	23.0576	39.5951			23.0513	41.1379			23.0984	31.9401			23.1211	40.4883			21.1673	22.0098			23.1138	32.4674			23.1129	40.8584			20.5271	21.5198			23.1027	32.6003			23.0984	38.3289			23.0889	40.346			23.0962	31.0063			23.0868
	23.1076	39.5947			23.1013	41.1478			23.1484	31.9531			23.1711	40.4886			21.2173	21.9762			23.1638	32.4819			23.1629	40.8587			20.5771	21.4881			23.1527	32.6151			23.1484	38.3261			23.1389	40.3548			23.1462	31.0167			23.1368
	23.1576	39.5943			23.1513	41.1577			23.1984	31.9662			23.2211	40.4889			21.2673	21.9426			23.2138	32.4964			23.2129	40.859			20.6271	21.4565			23.2027	32.6298			23.1984	38.3233			23.1889	40.3636			23.1962	31.027			23.1868
	23.2076	39.5939			23.2013	41.1675			23.2484	31.9792			23.2711	40.4892			21.3173	21.909			23.2638	32.5108			23.2629	40.8593			20.6771	21.4248			23.2527	32.6444			23.2484	38.3205			23.2389	40.3724			23.2462	31.0373			23.2368
	23.2576	39.5935			23.2513	41.1772			23.2984	31.9921			23.3211	40.4895			21.3673	21.8754			23.3138	32.5251			23.3129	40.8595			20.7271	21.3933			23.3027	32.659			23.2984	38.3177			23.2889	40.381			23.2962	31.0475			23.2868
	23.3076	39.593			23.3013	41.1869			23.3484	32.005			23.3711	40.4897			21.4173	21.8419			23.3638	32.5394			23.3629	40.8598			20.7771	21.3617			23.3527	32.6735			23.3484	38.3148			23.3389	40.3896			23.3462	31.0577			23.3368
	23.3576	39.5925			23.3513	41.1965			23.3984	32.0179			23.4211	40.49			21.4673	21.8084			23.4138	32.5536			23.4129	40.86			20.8271	21.3302			23.4027	32.6879			23.3984	38.312			23.3889	40.3982			23.3962	31.0679			23.3868
	23.4076	39.5921			23.4013	41.206			23.4484	32.0307			23.4711	40.4902			21.5173	21.7749			23.4638	32.5678			23.4629	40.8602			20.8771	21.2987			23.4527	32.7024			23.4484	38.3091			23.4389	40.4066			23.4462	31.078			23.4368
	23.4576	39.5916			23.4513	41.2155			23.4984	32.0434			23.5211	40.4904			21.5673	21.7415			23.5138	32.582			23.5129	40.8604			20.9271	21.2672			23.5027	32.7167			23.4984	38.3062			23.4889	40.415			23.4962	31.088			23.4868
	23.5076	39.5911			23.5013	41.2249			23.5484	32.0561			23.5711	40.4906			21.6173	21.7081			23.5638	32.596			23.5629	40.8606			20.9771	21.2357			23.5527	32.731			23.5484	38.3033			23.5389	40.4233			23.5462	31.098			23.5368
	23.5576	39.5906			23.5513	41.2342			23.5984	32.0687			23.6211	40.4908			21.6673	21.6748			23.6138	32.6101			23.6129	40.8608			21.0271	21.2043			23.6027	32.7453			23.5984	38.3004			23.5889	40.4316			23.5962	31.108			23.5868
	23.6076	39.59			23.6013	41.2434			23.6484	32.0813			23.6711	40.491			21.7173	21.6414			23.6638	32.624			23.6629	40.8609			21.0771	21.1729			23.6527	32.7595			23.6484	38.2975			23.6389	40.4398			23.6462	31.1179			23.6368
	23.6576	39.5895			23.6513	41.2526			23.6984	32.0938			23.7211	40.4911			21.7673	21.6081			23.7138	32.638			23.7129	40.8611			21.1271	21.1415			23.7027	32.7736			23.6984	38.2945			23.6889	40.4479			23.6962	31.1278			23.6868
	23.7076	39.5889			23.7013	41.2617			23.7484	32.1063			23.7711	40.4913			21.8173	21.5749			23.7638	32.6518			23.7629	40.8612			21.1771	21.1102			23.7527	32.7877			23.7484	38.2916			23.7389	40.456			23.7462	31.1376			23.7368
	23.7576	39.5883			23.7513	41.2708			23.7984	32.1188			23.8211	40.4914			21.8673	21.5416			23.8138	32.6657			23.8129	40.8613			21.2271	21.0789			23.8027	32.8018			23.7984	38.2886			23.7889	40.464			23.7962	31.1474			23.7868
	23.8076	39.5877			23.8013	41.2798			23.8484	32.1312			23.8711	40.4915			21.9173	21.5084			23.8638	32.6794			23.8629	40.8614			21.2771	21.0476			23.8527	32.8158			23.8484	38.2857			23.8389	40.4719			23.8462	31.1571			23.8368
	23.8576	39.5871			23.8513	41.2887			23.8984	32.1435			23.9211	40.4916			21.9673	21.4752			23.9138	32.6931			23.9129	40.8615			21.3271	21.0163			23.9027	32.8297			23.8984	38.2827			23.8889	40.4798			23.8962	31.1668			23.8868
	23.9076	39.5865			23.9013	41.2976			23.9484	32.1558			23.9711	40.4917			22.0173	21.4421			23.9638	32.7068			23.9629	40.8615			21.3771	20.9851			23.9527	32.8436			23.9484	38.2797			23.9389	40.4876			23.9462	31.1764			23.9368
	23.9576	39.5859			23.9513	41.3063			23.9984	32.168			24.0211	40.4917			22.0673	21.409			24.0138	32.7204			24.0129	40.8616			21.4271	20.9539			24.0027	32.8575			23.9984	38.2767			23.9889	40.4954			23.9962	31.186			23.9868
	24.0076	39.5852			24.0013	41.3151			24.0484	32.1802			24.0711	40.4918			22.1173	21.3759			24.0638	32.734			24.0629	40.8616			21.4771	20.9227			24.0527	32.8713			24.0484	38.2737			24.0389	40.5031			24.0462	31.1956			24.0368
	24.0576	39.5846			24.0513	41.3237			24.0984	32.1923			24.1211	40.4918			22.1673	21.3428			24.1138	32.7475			24.1129	40.8616			21.5271	20.8915			24.1027	32.885			24.0984	38.2706			24.0889	40.5107			24.0962	31.2051			24.0868
	24.1076	39.5839			24.1013	41.3323			24.1484	32.2044			24.1711	40.4918			22.2173	21.3098			24.1638	32.7609			24.1629	40.8616			21.5771	20.8604			24.1527	32.8987			24.1484	38.2676			24.1389	40.5182			24.1462	31.2145			24.1368
	24.1576	39.5832			24.1513	41.3409			24.1984	32.2165			24.2211	40.4918			22.2673	21.2768			24.2138	32.7743			24.2129	40.8616			21.6271	20.8293			24.2027	32.9123			24.1984	38.2645			24.1889	40.5257			24.1962	31.2239			24.1868
	24.2076	39.5825			24.2013	41.3493			24.2484	32.2284			24.2711	40.4918			22.3173	21.2438			24.2638	32.7877			24.2629	40.8615			21.6771	20.7982			24.2527	32.9259			24.2484	38.2614			24.2389	40.5332			24.2462	31.2333			24.2368
	24.2576	39.5817			24.2513	41.3577			24.2984	32.2404			24.3211	40.4918			22.3673	21.2109			24.3138	32.801			24.3129	40.8615			21.7271	20.7672			24.3027	32.9395			24.2984	38.2583			24.2889	40.5405			24.2962	31.2426			24.2868
	24.3076	39.581			24.3013	41.3661			24.3484	32.2523			24.3711	40.4917			22.4173	21.178			24.3638	32.8143			24.3629	40.8614			21.7771	20.7362			24.3527	32.9529			24.3484	38.2552			24.3389	40.5478			24.3462	31.2519			24.3368
	24.3576	39.5802			24.3513	41.3743			24.3984	32.2641			24.4211	40.4916			22.4673	21.1451			24.4138	32.8275			24.4129	40.8613			21.8271	20.7052			24.4027	32.9664			24.3984	38.2521			24.3889	40.5551			24.3962	31.2611			24.3868
	24.4076	39.5795			24.4013	41.3826			24.4484	32.2759			24.4711	40.4916			22.5173	21.1123			24.4638	32.8406			24.4629	40.8612			21.8771	20.6742			24.4527	32.9798			24.4484	38.249			24.4389	40.5623			24.4462	31.2703			24.4368
	24.4576	39.5787			24.4513	41.3907			24.4984	32.2876			24.5211	40.4914			22.5673	21.0795			24.5138	32.8537			24.5129	40.8611			21.9271	20.6433			24.5027	32.9931			24.4984	38.2459			24.4889	40.5694			24.4962	31.2795			24.4868
	24.5076	39.5779			24.5013	41.3988			24.5484	32.2993			24.5711	40.4913			22.6173	21.0467			24.5638	32.8667			24.5629	40.8609			21.9771	20.6123			24.5527	33.0064			24.5484	38.2427			24.5389	40.5765			24.5462	31.2885			24.5368
	24.5576	39.577			24.5513	41.4068			24.5984	32.311			24.6211	40.4912			22.6673	21.0139			24.6138	32.8797			24.6129	40.8608			22.0271	20.5814			24.6027	33.0196			24.5984	38.2395			24.5889	40.5835			24.5962	31.2976			24.5868
	24.6076	39.5762			24.6013	41.4148			24.6484	32.3226			24.6711	40.491			22.7173	20.9812			24.6638	32.8927			24.6629	40.8606			22.0771	20.5506			24.6527	33.0328			24.6484	38.2363			24.6389	40.5904			24.6462	31.3066			24.6368
	24.6576	39.5754			24.6513	41.4227			24.6984	32.3341			24.7211	40.4909			22.7673	20.9485			24.7138	32.9056			24.7129	40.8604			22.1271	20.5197			24.7027	33.0459			24.6984	38.2332			24.6889	40.5973			24.6962	31.3156			24.6868
	24.7076	39.5745			24.7013	41.4306			24.7484	32.3456			24.7711	40.4907			22.8173	20.9158			24.7638	32.9184			24.7629	40.8602			22.1771	20.4889			24.7527	33.059			24.7484	38.2299			24.7389	40.6042			24.7462	31.3245			24.7368
	24.7576	39.5736			24.7513	41.4383			24.7984	32.3571			24.8211	40.4905			22.8673	20.8832			24.8138	32.9312			24.8129	40.8599			22.2271	20.4581			24.8027	33.072			24.7984	38.2267			24.7889	40.6109			24.7962	31.3333			24.7868
	24.8076	39.5727			24.8013	41.4461			24.8484	32.3685			24.8711	40.4903			22.9173	20.8506			24.8638	32.944			24.8629	40.8597			22.2771	20.4274			24.8527	33.085			24.8484	38.2235			24.8389	40.6177			24.8462	31.3422			24.8368
	24.8576	39.5718			24.8513	41.4537			24.8984	32.3798			24.9211	40.49			22.9673	20.818			24.9138	32.9567			24.9129	40.8594			22.3271	20.3967			24.9027	33.0979			24.8984	38.2202			24.8889	40.6243			24.8962	31.3509			24.8868
	24.9076	39.5709			24.9013	41.4613			24.9484	32.3911			24.9711	40.4898			23.0173	20.7855			24.9638	32.9693			24.9629	40.8591			22.3771	20.3659			24.9527	33.1108			24.9484	38.217			24.9389	40.6309			24.9462	31.3597			24.9368
	24.9576	39.5699			24.9513	41.4689			24.9984	32.4024			25.0211	40.4895			23.0673	20.753			25.0138	32.9819			25.0129	40.8588			22.4271	20.3353			25.0027	33.1236			24.9984	38.2137			24.9889	40.6375			24.9962	31.3684			24.9868
	25.0076	39.5689			25.0013	41.4764			25.0484	32.4136			25.0711	40.4892			23.1173	20.7205			25.0638	32.9944			25.0629	40.8585			22.4771	20.3046			25.0527	33.1364			25.0484	38.2104			25.0389	40.644			25.0462	31.377			25.0368
	25.0576	39.568			25.0513	41.4838			25.0984	32.4247			25.1211	40.4889			23.1673	20.688			25.1138	33.0069			25.1129	40.8582			22.5271	20.274			25.1027	33.1491			25.0984	38.2071			25.0889	40.6504			25.0962	31.3856			25.0868
	25.1076	39.567			25.1013	41.4912			25.1484	32.4358			25.1711	40.4886			23.2173	20.6556			25.1638	33.0194			25.1629	40.8578			22.5771	20.2434			25.1527	33.1618			25.1484	38.2038			25.1389	40.6568			25.1462	31.3942			25.1368
	25.1576	39.5659			25.1513	41.4985			25.1984	32.4469			25.2211	40.4882			23.2673	20.6232			25.2138	33.0318			25.2129	40.8575			22.6271	20.2128			25.2027	33.1745			25.1984	38.2004			25.1889	40.6631			25.1962	31.4027			25.1868
	25.2076	39.5649			25.2013	41.5057			25.2484	32.4579			25.2711	40.4879			23.3173	20.5908			25.2638	33.0441			25.2629	40.8571			22.6771	20.1822			25.2527	33.187			25.2484	38.1971			25.2389	40.6693			25.2462	31.4111			25.2368
	25.2576	39.5639			25.2513	41.5129			25.2984	32.4689			25.3211	40.4875			23.3673	20.5585			25.3138	33.0564			25.3129	40.8567			22.7271	20.1517			25.3027	33.1996			25.2984	38.1937			25.2889	40.6755			25.2962	31.4195			25.2868
	25.3076	39.5628			25.3013	41.5201			25.3484	32.4798			25.3711	40.4871			23.4173	20.5262			25.3638	33.0687			25.3629	40.8563			22.7771	20.1212			25.3527	33.2121			25.3484	38.1903			25.3389	40.6817			25.3462	31.4279			25.3368
	25.3576	39.5617			25.3513	41.5272			25.3984	32.4907			25.4211	40.4867			23.4673	20.4939			25.4138	33.0809			25.4129	40.8558			22.8271	20.0907			25.4027	33.2245			25.3984	38.1869			25.3889	40.6878			25.3962	31.4363			25.3868
	25.4076	39.5606			25.4013	41.5342			25.4484	32.5015			25.4711	40.4863			23.5173	20.4616			25.4638	33.093			25.4629	40.8554			22.8771	20.0603			25.4527	33.2369			25.4484	38.1835			25.4389	40.6938			25.4462	31.4445			25.4368
	25.4576	39.5595			25.4513	41.5411			25.4984	32.5123			29.5011	40.3705			23.5673	20.4294			27.5038	33.5702			27.5029	40.8101			22.9271	20.0299			25.5027	33.2492			25.4984	38.1801			25.4889	40.6998			25.4962	31.4528			25.4868
	26.5026	39.5253			25.5013	41.5481			34.5034	33.8283			39.5011	39.6167			23.6173	20.3972			37.5038	34.9141			37.5029	40.1751			22.9771	19.9995			35.5027	34.9485			34.5034	37.247			32.5039	41.0922			34.5012	32.3252			32.5018
	36.5026	38.8339			35.5013	42.0626			44.5034	34.1501			49.5011	38.3643			23.6673	20.3651			47.5038	35.2115			47.5029	39.0007			23.0271	19.9691			45.5027	35.454			44.5034	35.7258			42.5039	40.6819			44.5012	32.2187			42.5018
	46.5026	37.5948			45.5013	41.5336			54.5034	33.795			59.5011	36.8116			23.7173	20.3329			57.5038	34.9131			57.5029	37.497			23.0771	19.9387			55.5027	35.3001			54.5034	33.8553			52.5039	39.6943			54.5012	31.4532			52.5018
	56.5026	36.0072			55.5013	40.5045			64.5034	33.0009			69.5011	35.0986			23.7673	20.3008			67.5038	34.2134			67.5029	35.816			23.1271	19.9084			65.5027	34.7164			64.5034	31.7748			62.5039	38.3674			64.5012	30.2497			62.5018
	66.5026	34.219			65.5013	39.1769			74.5034	31.8814			79.5011	33.3248			23.8173	20.2687			77.5038	33.2119			77.5029	34.0668			23.1771	19.8781			75.5027	33.8164			74.5034	29.5864			72.5039	36.8034			74.5012	28.7135			72.5018
	76.5026	32.3344			75.5013	37.6442			84.5034	30.5045			89.5011	31.5606			23.8673	20.2367			87.5038	31.9727			87.5029	32.327			23.2271	19.8478			85.5027	32.6702			84.5034	27.3653			82.5039	35.0601			84.5012	26.9051			82.5018
	86.5026	30.4278			85.5013	35.9617			94.5034	28.9188			99.5011	29.8493			23.9173	20.2047			97.5038	30.545			97.5029	30.6456			23.2771	19.8176			95.5027	31.3301			94.5034	25.16			92.5039	33.178			94.5012	24.8645			92.5018
	96.5026	28.548			95.5013	34.1691			104.503	27.1637			109.501	28.2088			23.9673	20.1727			107.504	28.9696			107.503	29.0428			23.3271	19.7874			105.503	29.8395			104.503	22.9918			102.504	31.189			104.501	22.6192			102.502
	106.503	26.7196			105.501	32.2979			114.503	25.272			119.501	26.637			24.0173	20.1407			117.504	27.2821			117.503	27.5159			23.3771	19.7572			115.503	28.2357			114.503	20.8577			112.504	29.1187			114.501	20.1866			112.502
	116.503	24.9475			115.501	30.3744			124.503	23.2708			129.501	25.1192			24.0673	20.1088			127.504	25.5126			127.503	26.0467			23.4271	19.727			125.503	26.5509			124.503	18.738			122.504	26.9869			124.501	17.5746			122.502
	126.503	23.2227			125.501	28.4196			134.503	21.1821			139.501	23.6345			24.1173	20.0769			137.504	23.6867			137.503	24.6108			23.4771	19.6969			135.503	24.8125			134.503	16.6028			132.504	24.8079			134.501	14.7825			132.502
	136.503	21.528			135.501	26.4504			144.503	19.0236			149.501	22.161			24.1673	20.045			147.504	21.8258			147.503	23.1837			23.5271	19.6667			145.503	23.0436			144.503	14.4175			142.504	22.5905			144.501	11.8032			142.502
	146.503	19.8433			145.501	24.4793			154.503	16.8095			159.501	20.6789			24.2173	20.0132			157.504	19.9476			157.503	21.7442			23.5771	19.6366			155.503	21.2634			154.503	12.1453			152.504	20.3394			154.501	8.61585			152.502
	156.503	18.1477			155.501	22.5153			164.503	14.5509			169.501	19.1716			24.2673	19.9813			167.504	18.0666			167.503	20.2767			23.6271	19.6066			165.503	19.4874			164.503	9.74639			162.504	18.0558			164.501	5.16193			162.502
	166.503	16.4214			165.501	20.5648			174.503	12.258			179.501	17.6271			24.3173	19.9496			177.504	16.1948			177.503	18.771			23.6771	19.5765			175.503	17.7286			174.503	7.17233			172.504	15.739			174.501	1.30268			172.502
	176.503	14.6465			175.501	18.6328			184.503	9.93655			189.501	16.0371			24.3673	19.9178			187.504	14.3419			187.503	17.2222			23.7271	19.5465			185.503	15.997			184.503	4.35607			182.504	13.387			184.501	-3.28634			182.502
	186.503	12.8075			185.501	16.7229			194.503	7.58194			199.501	14.3974			24.4173	19.8861			197.504	12.516			197.503	15.6292			23.7771	19.5165			195.503	14.3003			194.503	1.18874			192.504	10.9974			194.501	-9.12347			192.502
	196.503	10.8905			195.501	14.8383			204.503	5.1767			209.501	12.7065			24.4673	19.8544			207.504	10.7216			207.503	13.9937			23.8271	19.4865			205.503	12.6445			204.503	-2.51445			202.504	8.56271			204.501	-16.2614			202.502
	206.503	8.88233			205.501	12.9816			214.503	2.67977			219.501	10.9652			24.5173	19.8227			217.504	8.9567			217.503	12.3196			23.8771	19.4566			215.503	11.0313			214.503	-6.99833			212.504	6.06697			214.501	-23.9588			212.502
	216.503	6.76878			215.501	11.1542			224.503	0.0111228			229.501	9.17463			24.5673	19.791			227.504	7.21413			227.503	10.611			23.9271	19.4267			225.503	9.45709			224.503	-12.3264			222.504	3.4768			224.501	-31.7947			222.502
	226.503	4.53116			225.501	9.35398			234.503	-2.9636			239.501	7.33561			24.6173	19.7594			237.504	5.47927			237.503	8.87146			23.9771	19.3968			235.503	7.91345			234.503	-18.146			232.504	0.727047			233.751	-39.1477			232.502
	236.503	2.14131			235.501	7.57487			244.503	-6.42061			249.501	5.44667			24.6673	19.7278			247.504	3.72781			247.503	7.10334			24.0271	19.3669			245.503	6.38633			244.503	-24.0486			242.504	-2.29403			236.249	-41.1589			242.502
	246.503	-0.443519			245.501	5.80458			254.503	-10.471			259.501	3.50262			24.7173	19.6962			257.504	1.92316			257.503	5.30639			24.0771	19.337			255.503	4.85471			254.503	-29.9517			252.504	-5.73443			238.747	-43.1861			252.502
	256.503	-3.27908			255.501	4.02235			264.503	-14.9963			269.501	1.49324			24.7673	19.6647			267.504	0.0141253			267.503	3.47713			24.1271	19.3072			265.503	3.28964			264.503	-35.9251			262.504	-9.68306			241.245	-45.2322			262.502
	266.503	-6.41064			265.501	2.1967			274.503	-19.696			279.501	-0.596838			24.8173	19.6332			277.504	-2.06578			277.503	1.60823			24.1771	19.2774			275.503	1.6536			274.503	-42.0378			272.504	-14.0171			243.743	-47.3002			272.502
	276.503	-9.82252			275.501	0.283618			284.503	-24.3754			289.501	-2.78532			24.8673	19.6017			287.504	-4.3919			287.503	-0.311247			24.2271	19.2476			285.503	-0.0993089			284.503	-48.4148			282.504	-18.4235			246.241	-49.394			282.502
	286.503	-13.4088			285.501	-1.77286			294.503	-29.1101			299.501	-5.08448			24.9173	19.5703			297.504	-7.02458			297.503	-2.29381			24.2771	19.2179			295.503	-2.02125			294.503	-55.2029			292.504	-22.6458			248.739	-51.5184			292.502
	296.503	-17.0119			295.501	-4.03382			304.503	-34.0023			309.501	-7.48912			24.9673	19.5388			307.504	-9.96412			307.503	-4.34886			24.3271	19.1882			305.503	-4.16378			303.508	-61.8994			302.504	-26.7603			251.238	-53.6801			302.502
	306.503	-20.4952			305.501	-6.54473			314.503	-39.085			319.501	-9.96705			25.0173	19.5074			317.504	-13.1171			317.503	-6.47553			24.3771	19.1585			315.503	-6.56098			303.558	-61.9391			312.504	-31.0279			253.736	-55.8885			312.502
	316.503	-23.8448			315.501	-9.29908			324.503	-44.4331			329.501	-12.4588			25.0673	19.4761			327.504	-16.3185			327.503	-8.65579			24.4271	19.1288			325.503	-9.20233			303.608	-61.979			322.504	-35.5623			256.234	-58.1554			322.502
	326.503	-27.1709			325.501	-12.2098			334.503	-50.1857			339.501	-14.884			25.1173	19.4447			337.504	-19.4059			337.503	-10.8515			24.4771	19.0991			335.503	-12.0136			303.658	-62.0188			332.504	-40.3887			258.732	-60.4952			332.502
	336.503	-30.5617			335.501	-15.118			344.503	-56.5909			349.501	-17.1579			25.1673	19.4134			347.504	-22.3334			347.503	-13.0056			24.5271	19.0695			345.503	-14.8678			303.708	-62.0587			342.504	-45.5781			260.006	-61.7219			342.502
	346.503	-34.0495			345.501	-17.8365			351.518	-61.7459			359.501	-19.2365			25.2173	19.3821			357.504	-25.1979			357.503	-15.0467			24.5771	19.0399			355.503	-17.6214			303.758	-62.0986			352.504	-51.2744			260.056	-61.7707			352.502
	356.503	-37.6607			355.501	-20.2438			351.568	-61.786			369.501	-21.1553			25.2673	19.3509			367.504	-28.0987			367.503	-16.9107			24.6271	19.0103			365.503	-20.1812			303.808	-62.1386			362.504	-57.767			260.106	-61.8195			362.502
	366.503	-41.4438			365.501	-22.3724			351.618	-61.826			379.501	-22.9868			25.3173	19.3196			377.504	-31.0811			377.503	-18.5812			24.6771	18.9808			375.503	-22.5715			303.858	-62.1786			367.529	-61.5137			260.156	-61.8684			372.502
	376.503	-45.4712			375.501	-24.3308			351.668	-61.8662			389.501	-24.7853			25.3673	19.2884			387.504	-34.1713			387.503	-20.0987			24.7271	18.9512			385.503	-24.8771			303.908	-62.2186			367.579	-61.5538			260.206	-61.9173			382.502
	386.503	-49.8348			385.501	-26.2064			351.718	-61.9064			399.501	-26.5878			25.4173	19.2572			397.504	-37.4005			397.503	-21.5146			24.7771	18.9217			395.503	-27.1588			303.958	-62.2587			367.629	-61.5939			260.256	-61.9662			383.547
	396.503	-54.67			395.501	-28.0758			351.768	-61.9466			409.501	-28.4254			25.4673	19.2261			407.504	-40.8165			407.503	-22.8609			24.8271	18.8922			405.503	-29.459			304.008	-62.2987			367.679	-61.634			260.306	-62.0151			383.597
	406.503	-60.2285			405.501	-30.0139			351.818	-61.9869			419.501	-30.3222			28.5023	17.3642			417.504	-44.4892			417.503	-24.1621			24.8771	18.8628			415.503	-31.8149			304.058	-62.3389			367.729	-61.6742			260.356	-62.0642			383.647
	409.538	-62.1219			415.501	-32.0837			351.868	-62.0272			429.501	-32.2959			38.5023	11.8398			427.504	-48.5197			427.503	-25.4436			24.9271	18.8333			425.503	-34.2592			304.108	-62.379			367.779	-61.7144			260.406	-62.1132			383.697
	409.588	-62.1545			425.501	-34.3322			351.918	-62.0676			439.501	-34.3603			48.5023	7.03231			437.504	-53.0708			437.503	-26.7318			24.9771	18.8039			435.503	-36.825			304.158	-62.4192			367.829	-61.7547			260.456	-62.1623			383.747
	409.638	-62.1871			435.501	-36.7954			351.968	-62.108			449.501	-36.5297			58.5023	2.71848			447.504	-58.4489			447.503	-28.0504			25.0271	18.7745			445.503	-39.5509			304.208	-62.4594			367.879	-61.795			260.506	-62.2114			383.797
	409.688	-62.2197			445.501	-39.5087			352.018	-62.1485			459.501	-38.8229			68.5023	-1.26497			452.529	-61.636			457.503	-29.4196			25.0771	18.7452			455.503	-42.4872			304.258	-62.4996			367.929	-61.8354			260.556	-62.2606			383.847
	409.738	-62.2524			455.501	-42.5197			352.068	-62.189			469.501	-41.2664			78.5023	-5.02357			452.579	-61.6704			467.503	-30.8547			25.1271	18.7158			465.503	-45.7015			304.308	-62.5399			367.979	-61.8759			260.606	-62.3098			383.897
	409.788	-62.2851			465.501	-45.8979			352.118	-62.2296			479.501	-43.8968			88.5023	-8.60119			452.629	-61.7048			477.503	-32.3676			25.1771	18.6865			475.503	-49.2922			304.358	-62.5802			368.029	-61.9164			260.656	-62.3591			383.947
	409.838	-62.3178			475.501	-49.7514			352.168	-62.2702			489.501	-46.7638			98.5023	-11.9921			452.679	-61.7392			487.503	-33.9674			25.2271	18.6572			485.503	-53.4205			304.408	-62.6206			368.079	-61.9569			260.706	-62.4084			383.997
	409.888	-62.3506			485.501	-54.2694			352.218	-62.3108			499.501	-49.939			108.502	-15.147			452.729	-61.7737			497.503	-35.6631			25.2771	18.628			495.503	-58.3839			304.458	-62.6609			368.129	-61.9975			260.756	-62.4577			384.047
	409.938	-62.3834			495.501	-59.8243			352.268	-62.3516			509.501	-53.5338			118.502	-17.952			452.779	-61.8083			507.503	-37.4655			25.3271	18.5987			501.523	-61.996			304.508	-62.7013			368.179	-62.0382			260.806	-62.5071			384.097
	409.988	-62.4163			498.536	-61.8142			352.318	-62.3923			519.501	-57.7374			128.502	-20.2392			452.829	-61.8429			517.503	-39.3894			25.3771	18.5695			501.573	-62.0291			304.558	-62.7418			368.229	-62.0789			260.856	-62.5565			384.147
	410.038	-62.4492			498.586	-61.8491			352.368	-62.4331			527.511	-61.7594			138.502	-21.8826			452.879	-61.8776			527.503	-41.4556			25.4271	18.5403			501.623	-62.0623			304.608	-62.7822			368.279	-62.1196			260.906	-62.606			384.197
	410.088	-62.4821			498.636	-61.8839			352.418	-62.474			527.561	-61.7873			148.502	-22.8823			452.929	-61.9123			537.503	-43.6927			25.4771	18.5111			501.673	-62.0955			304.658	-62.8227			368.329	-62.1604			260.956	-62.6555			384.247
	410.138	-62.5151			498.686	-61.9189			352.468	-62.5149			527.611	-61.8152			158.502	-23.3222			452.979	-61.947			547.503	-46.1406			30.5021	15.6649			501.723	-62.1288			304.708	-62.8633			368.379	-62.2013			261.006	-62.705			384.297
	410.188	-62.5481			498.736	-61.9539			352.518	-62.5559			527.661	-61.8431			168.502	-23.2665			453.029	-61.9818			557.503	-48.8561			40.5021	10.5911			501.773	-62.1621			304.758	-62.9038			368.429	-62.2422			261.056	-62.7546			384.347
	410.238	-62.5811			498.786	-61.9889			352.568	-62.5969			527.711	-61.871			178.502	-22.6971			453.079	-62.0167			567.503	-51.9257			50.5021	6.11824			501.823	-62.1954			304.808	-62.9444			368.479	-62.2832			261.106	-62.8042			384.397
	410.288	-62.6142			498.836	-62.024			352.618	-62.638			527.761	-61.899			188.502	-21.4709			453.129	-62.0516			577.503	-55.489			60.5021	2.07361			501.873	-62.2289			304.858	-62.9851			368.529	-62.3242			261.156	-62.8539			384.447
	410.338	-62.6473			498.886	-62.0592			352.668	-62.6791			527.811	-61.9271			198.502	-19.2184			453.179	-62.0866			587.503	-59.7835			70.5021	-1.67114			501.923	-62.2623			304.908	-63.0257			368.579	-62.3652			261.206	-62.9036			384.497
	410.388	-62.6804			498.936	-62.0944			352.718	-62.7202			527.861	-61.9551			208.502	-14.9505			453.229	-62.1216			591.533	-61.8052			70.5521	-1.68915			501.973	-62.2959			304.958	-63.0664			368.629	-62.4064			261.256	-62.9534			384.547
	410.438	-62.7136			498.986	-62.1297			352.768	-62.7614			527.911	-61.9832			213.914	-10.6482			453.279	-62.1566			591.583	-61.8319			70.6021	-1.70716			502.023	-62.3294			305.008	-63.1071			368.679	-62.4475			261.306	-63.0032			384.597
	410.488	-62.7468			499.036	-62.165			352.818	-62.8027			527.961	-62.0114			216.267	-7.60904			453.329	-62.1917			591.633	-61.8587			70.6521	-1.72517			502.073	-62.3631			305.058	-63.1479			368.729	-62.4888			261.356	-63.053			384.647
	410.538	-62.78			499.086	-62.2004			352.868	-62.844			528.011	-62.0395			218.619	-3.11585			453.379	-62.2269			591.683	-61.8855			70.7021	-1.74317			502.123	-62.3968			305.108	-63.1887			368.779	-62.53			261.406	-63.1029			384.697
	410.588	-62.8133			499.136	-62.2358			352.918	-62.8854			528.061	-62.0677			220.972	3.22624			453.429	-62.2621			591.733	-61.9123			70.7521	-1.76117			502.173	-62.4305			305.158	-63.2295			368.829	-62.5714			261.456	-63.1528			384.747
	410.638	-62.8467			499.186	-62.2713			352.968	-62.9268			528.111	-62.096			223.324	9.90448			453.479	-62.2974			591.783	-61.9392			70.8021	-1.77916			502.223	-62.4643			305.208	-63.2704			368.879	-62.6128			261.506	-63.2028			384.797
	410.688	-62.88			499.236	-62.3069			353.018	-62.9682			528.161	-62.1243			225.677	15.1935			453.529	-62.3327			591.833	-61.9661			70.8521	-1.79716			502.273	-62.4981			305.258	-63.3113			368.929	-62.6542			261.556	-63.2528			384.847
	410.738	-62.9134			499.286	-62.3425			353.068	-63.0098			528.211	-62.1526			228.03	19.0169			453.579	-62.368			591.883	-61.993			70.9021	-1.81514			502.323	-62.532			305.308	-63.3522			368.979	-62.6957			261.606	-63.3028			384.897
	410.788	-62.9468			499.336	-62.3781			353.118	-63.0513			528.261	-62.1809			230.382	21.7595			453.629	-62.4034			591.933	-62.02			70.9521	-1.83313			502.373	-62.5659			305.358	-63.3931			369.029	-62.7373			261.656	-63.3529			384.947
	410.838	-62.9803			499.386	-62.4139			353.168	-63.0929			528.311	-62.2093			236.268	25.7242			453.679	-62.4389			591.983	-62.047			71.0021	-1.8511			502.423	-62.5999			305.408	-63.4341			369.079	-62.7789			261.706	-63.4031			384.997
	410.888	-63.0138			499.436	-62.4496			353.218	-63.1346			528.361	-62.2378			245.978	27.6389			453.729	-62.4744			592.033	-62.0741			71.0521	-1.86908			502.473	-62.634			305.458	-63.4752			369.129	-62.8205			261.756	-63.4533			385.047
	410.938	-63.0474			499.486	-62.4855			353.268	-63.1763			528.411	-62.2662			255.978	27.1169			453.779	-62.51			592.083	-62.1011			71.1021	-1.88705			502.523	-62.668			305.508	-63.5162			369.179	-62.8622			261.806	-63.5035			385.097
	410.988	-63.0809			499.536	-62.5213			353.318	-63.2181			528.461	-62.2947			265.978	25.5833			453.829	-62.5456			592.133	-62.1283			71.1521	-1.90502			502.573	-62.7022			305.558	-63.5573			369.229	-62.904			261.856	-63.5538			385.147
	411.038	-63.1146			499.586	-62.5573			353.368	-63.2599			528.511	-62.3233			275.978	23.6176			453.879	-62.5813			592.183	-62.1554			71.2021	-1.92298			502.623	-62.7364			305.608	-63.5984			369.279	-62.9458			261.906	-63.6041			385.197
	411.088	-63.1482			499.636	-62.5933			353.418	-63.3018			528.561	-62.3518			285.978	21.461			453.929	-62.617			592.233	-62.1826			71.2521	-1.94094			502.673	-62.7706			305.658	-63.6396			369.329	-62.9877			261.956	-63.6544			385.247
	411.138	-63.1819			499.686	-62.6293			353.468	-63.3437			528.611	-62.3804			295.978	19.2155			453.979	-62.6527			592.283	-62.2099			71.3021	-1.95889			502.723	-62.8049			305.708	-63.6808			369.379	-63.0296			262.006	-63.7048			385.297
	411.188	-63.2156			499.736	-62.6654			353.518	-63.3857			528.661	-62.4091			305.978	16.9201			454.029	-62.6886			592.333	-62.2371			71.3521	-1.97684			502.773	-62.8393			305.758	-63.722			369.429	-63.0716			262.056	-63.7553			385.347
	411.238	-63.2494			499.786	-62.7016			353.568	-63.4277			528.711	-62.4377			315.978	14.5848			454.079	-62.7244			592.383	-62.2644			71.4021	-1.99479			502.823	-62.8737			305.808	-63.7632			369.479	-63.1136			262.106	-63.8058			385.397
	411.288	-63.2832			499.836	-62.7378			353.618	-63.4698			528.761	-62.4665			325.978	12.207			454.129	-62.7604			592.433	-62.2918			71.4521	-2.01273			502.873	-62.9082			305.858	-63.8045			369.529	-63.1557			262.156	-63.8563			385.447
	411.338	-63.3171			499.886	-62.7741			353.668	-63.5119			528.811	-62.4952			335.978	9.77781			454.179	-62.7963			592.483	-62.3191			71.5021	-2.03067			502.923	-62.9427			305.908	-63.8459			369.579	-63.1979			262.206	-63.9069			385.497
	411.388	-63.3509			499.936	-62.8104			353.718	-63.5541			528.861	-62.524			345.978	7.28537			454.229	-62.8324			592.533	-62.3465			71.5521	-2.0486			502.973	-62.9772			305.958	-63.8872			369.629	-63.2401			262.256	-63.9575			385.547
	411.438	-63.3849			499.986	-62.8468			353.768	-63.5964			528.911	-62.5528			355.978	4.71515			454.279	-62.8685			592.583	-62.374			71.6021	-2.06653			503.023	-63.0119			306.008	-63.9286			369.679	-63.2824			262.306	-64.0082			385.597
	411.488	-63.4188			500.036	-62.8833			353.818	-63.6386			528.961	-62.5817			365.978	2.04996			454.329	-62.9046			592.633	-62.4015			71.6521	-2.08445			503.073	-63.0465			306.058	-63.97			369.729	-63.3247			262.356	-64.0589			385.647
	411.538	-63.4528			500.086	-62.9198			353.868	-63.681			529.011	-62.6106			375.978	-0.72664			454.379	-62.9408			592.683	-62.429			71.7021	-2.10237			503.123	-63.0813			306.108	-64.0115			369.779	-63.3671			262.406	-64.1097			385.697
	411.588	-63.4868			500.136	-62.9564			353.918	-63.7234			529.061	-62.6395			385.978	-3.61811			454.429	-62.977			592.733	-62.4566			74.7371	-3.18642			503.173	-63.116			306.158	-64.053			369.829	-63.4095			262.456	-64.1605			385.747
	411.638	-63.5209			500.186	-62.993			353.968	-63.7658			529.111	-62.6685			395.978	-6.59552			454.479	-63.0133			592.783	-62.4841			84.7371	-6.63752			503.223	-63.1509			306.208	-64.0945			369.879	-63.452			262.506	-64.2113			385.797
	411.688	-63.555			500.236	-63.0297			354.018	-63.8083			529.161	-62.6975			405.978	-9.59152			454.529	-63.0497			592.833	-62.5118			94.7371	-9.91349			503.273	-63.1858			306.258	-64.1361			369.929	-63.4945			262.556	-64.2622			385.847
	411.738	-63.5892			500.286	-63.0664			354.068	-63.8509			529.211	-62.7266			415.978	-12.5188			454.579	-63.0861			592.883	-62.5394			104.737	-12.9963			503.323	-63.2207			306.308	-64.1777			369.979	-63.5371			262.606	-64.3132			385.897
	411.788	-63.6233			500.336	-63.1032			354.118	-63.8935			529.261	-62.7556			425.978	-15.2814			454.629	-63.1225			592.933	-62.5671			114.737	-15.8219			503.373	-63.2557			306.358	-64.2193			370.029	-63.5798			262.656	-64.3642			385.947
	411.838	-63.6576			500.386	-63.1401			354.168	-63.9362			529.311	-62.7848			435.978	-17.7619			454.679	-63.159			592.983	-62.5949			124.737	-18.2664			503.423	-63.2908			306.408	-64.261			370.079	-63.6225			262.706	-64.4152			385.997
	411.888	-63.6918			500.436	-63.177			354.218	-63.9789			529.361	-62.8139			445.978	-19.8251			454.729	-63.1956			593.033	-62.6227			134.737	-20.1827			503.473	-63.3259			306.458	-64.3027			370.129	-63.6653			262.756	-64.4663			386.047
	411.938	-63.7261			500.486	-63.214			354.268	-64.0216			529.411	-62.8431			455.978	-21.3634			454.779	-63.2322			593.083	-62.6505			144.737	-21.4804			503.523	-63.361			306.508	-64.3444			370.179	-63.7081			262.806	-64.5174			386.097
	411.988	-63.7605			500.536	-63.251			354.318	-64.0645			529.461	-62.8723			465.978	-22.3406			454.829	-63.2689			593.133	-62.6783			154.737	-22.1618			503.573	-63.3962			306.558	-64.3862			370.229	-63.751			262.856	-64.5686			386.147
	412.038	-63.7948			500.586	-63.2881			354.368	-64.1073			529.511	-62.9016			475.978	-22.7801			454.879	-63.3056			593.183	-62.7062			164.737	-22.2711			503.623	-63.4315			306.608	-64.428			370.279	-63.7939			262.906	-64.6198			386.197
	412.088	-63.8292			500.636	-63.3252			354.418	-64.1503			529.561	-62.9309			485.978	-22.7035			454.929	-63.3424			593.233	-62.7342			174.737	-21.8143			503.673	-63.4668			306.658	-64.4698			370.329	-63.8369			262.956	-64.671			386.247
	412.138	-63.8637			500.686	-63.3625			354.468	-64.1933			529.611	-62.9603			495.978	-22.0698			454.979	-63.3792			593.283	-62.7621			184.737	-20.6986			503.723	-63.5022			306.708	-64.5117			370.379	-63.88			263.006	-64.7223			386.297
	412.188	-63.8982			500.736	-63.3997			354.518	-64.2363			529.661	-62.9897			505.978	-20.7149			455.029	-63.4161			593.333	-62.7901			194.737	-18.6632			503.773	-63.5377			306.758	-64.5536			370.429	-63.9231			263.056	-64.7737			386.347
	412.238	-63.9327			500.786	-63.4371			354.568	-64.2794			529.711	-63.0191			515.979	-18.231			455.079	-63.453			593.383	-62.8182			204.737	-15.0881			503.823	-63.5732			306.808	-64.5955			370.479	-63.9663			263.106	-64.8251			386.397
	412.288	-63.9673			500.836	-63.4744			354.618	-64.3226			529.761	-63.0485			525.979	-13.4924			455.129	-63.49			593.433	-62.8462			213.197	-9.43571			503.873	-63.6087			306.858	-64.6375			370.529	-64.0095			263.156	-64.8765			386.447
	412.338	-64.0019			500.886	-63.5119			354.668	-64.3658			529.811	-63.078			530.577	-9.50304			455.179	-63.5271			593.483	-62.8743			215.496	-6.89448			503.923	-63.6443			306.908	-64.6795			370.579	-64.0528			263.206	-64.928			386.497
	412.388	-64.0366			500.936	-63.5494			354.718	-64.409			529.861	-63.1076			532.859	-6.40802			455.229	-63.5642			593.533	-62.9025			217.795	-3.47875			503.973	-63.68			306.958	-64.7215			370.629	-64.0961			263.256	-64.9795			386.547
	412.438	-64.0712			500.986	-63.587			354.768	-64.4523			529.911	-63.1372			535.142	-1.99062			455.279	-63.6014			593.583	-62.9307			220.094	0.935804			504.023	-63.7157			307.008	-64.7636			370.679	-64.1395			263.306	-65.0311			386.597
	412.488	-64.106			501.036	-63.6246			354.818	-64.4957			529.961	-63.1668			537.425	3.80746			455.329	-63.6386			593.633	-62.9589			222.393	5.82637			504.073	-63.7515			307.058	-64.8057			370.729	-64.183			263.356	-65.0827			386.647
	412.538	-64.1407			501.086	-63.6623			354.868	-64.5391			530.011	-63.1964			539.708	9.66167			455.379	-63.6759			593.683	-62.9872			224.693	10.2673			504.123	-63.7873			307.108	-64.8479			370.779	-64.2265			263.406	-65.1344			386.697
	412.588	-64.1755			501.136	-63.7001			354.918	-64.5826			530.061	-63.2261			541.991	14.391			455.429	-63.7132			593.733	-63.0155			226.992	13.8554			504.173	-63.8232			307.158	-64.8901			370.829	-64.2701			263.456	-65.1861			386.747
	412.638	-64.2104			501.186	-63.7379			354.968	-64.6261			530.111	-63.2558			544.274	17.9293			455.479	-63.7506			593.783	-63.0438			229.291	16.642			504.223	-63.8591			307.208	-64.9323			370.879	-64.3138			263.506	-65.2379			386.797
	412.688	-64.2453			501.236	-63.7758			355.018	-64.6697			530.161	-63.2856			546.557	20.5452			455.529	-63.788			593.833	-63.0722			232.971	19.8331			504.273	-63.8951			307.258	-64.9745			370.929	-64.3575			263.556	-65.2897			386.847
	412.738	-64.2802			501.286	-63.8137			355.068	-64.7134			530.211	-63.3154			552.367	24.536			455.579	-63.8255			593.883	-63.1006			242.177	23.6162			504.323	-63.9312			307.308	-65.0168			370.979	-64.4012			263.606	-65.3416			386.897
	412.788	-64.3152			501.336	-63.8517			355.118	-64.7571			530.261	-63.3453			561.969	26.6561			455.629	-63.8631			593.933	-63.1291			252.177	24.3427			504.373	-63.9673			307.358	-65.0592			371.029	-64.445			263.656	-65.3935			386.947
	412.838	-64.3502			501.386	-63.8897			355.168	-64.8009			530.311	-63.3751			571.969	26.3129			455.679	-63.9007			593.983	-63.1576			262.177	23.5364			504.423	-64.0035			307.408	-65.1015			371.079	-64.4889			263.706	-65.4454			386.997
	412.888	-64.3852			501.436	-63.9279			355.218	-64.8447			530.361	-63.4051			581.969	24.8956			455.729	-63.9384			594.033	-63.1861			272.177	22.0173			504.473	-64.0397			307.458	-65.1439			371.129	-64.5328			263.756	-65.4974			387.047
	412.938	-64.4203			501.486	-63.9661			355.268	-64.8885			530.411	-63.435			591.969	23.0054			455.779	-63.9761			594.083	-63.2147			282.177	20.1475			504.523	-64.076			307.508	-65.1863			371.179	-64.5768			263.806	-65.5495			387.097
	412.988	-64.4554			501.536	-64.0043			355.318	-64.9325			530.461	-63.465			601.969	20.8981			455.829	-64.0139			594.133	-63.2433			292.177	18.0955			504.573	-64.1123			307.558	-65.2288			371.229	-64.6209			263.856	-65.6016			387.147
	413.038	-64.4906			501.586	-64.0426			355.368	-64.9765			530.511	-63.4951			611.969	18.6843			455.879	-64.0517			594.183	-63.272			302.177	15.9391			504.623	-64.1487			307.608	-65.2713			371.279	-64.665			263.906	-65.6537			387.197
	413.088	-64.5258			501.636	-64.081			355.418	-65.0205			530.561	-63.5251			621.969	16.4089			455.929	-64.0896			594.233	-63.3007			312.177	13.7126			504.673	-64.1852			307.658	-65.3139			371.329	-64.7092			263.956	-65.7059			387.247
	413.138	-64.561			501.686	-64.1194			355.468	-65.0646			530.611	-63.5553			631.969	14.0859			455.979	-64.1275			594.283	-63.3294			322.177	11.4289			504.723	-64.2217			307.708	-65.3564			371.379	-64.7534			264.006	-65.7581			387.297
	413.188	-64.5963			501.736	-64.1579			355.518	-65.1087			530.661	-63.5854			641.969	11.715			456.029	-64.1656			594.333	-63.3581			332.177	9.09008			504.773	-64.2583			307.758	-65.399			371.429	-64.7977			264.056	-65.8104			387.347
	413.238	-64.6316			501.786	-64.1965			355.568	-65.153			530.711	-63.6156			651.969	9.28921			456.079	-64.2036			594.383	-63.387			342.177	6.69209			504.823	-64.2949			307.808	-65.4417			371.479	-64.8421			264.106	-65.8627			387.397
	413.288	-64.667			501.836	-64.2351			355.618	-65.1972			530.761	-63.6459			661.969	6.79763			456.129	-64.2418			594.433	-63.4158			352.177	4.22677			504.873	-64.3316			307.858	-65.4844			371.529	-64.8865			264.156	-65.9151			387.447
	413.338	-64.7024			501.886	-64.2738			355.668	-65.2416			530.811	-63.6761			671.969	4.22633			456.179	-64.2799			594.483	-63.4447			362.177	1.68316			504.923	-64.3683			307.908	-65.5271			371.579	-64.931			264.206	-65.9675			387.497
	413.388	-64.7379			501.936	-64.3125			355.718	-65.2859			530.861	-63.7065			681.969	1.55879			456.229	-64.3182			594.533	-63.4736			372.177	-0.948509			504.973	-64.4052			307.958	-65.5698			371.629	-64.9755			264.256	-66.02			387.547
	413.438	-64.7734			501.986	-64.3513			355.768	-65.3304			530.911	-63.7368			691.969	-1.21948			456.279	-64.3565			594.583	-63.5026			375.212	-1.76485			505.023	-64.442			308.008	-65.6126			371.679	-65.0201			264.306	-66.0725			387.597
	413.488	-64.8089			502.036	-64.3902			355.818	-65.3749			530.961	-63.7672			701.969	-4.1073			456.329	-64.3948			594.633	-63.5316			375.262	-1.77823			505.073	-64.479			308.058	-65.6554			371.729	-65.0648			264.356	-66.1251			387.647
	413.538	-64.8445			502.086	-64.4291			355.868	-65.4194			531.011	-63.7977			711.969	-7.06969			456.379	-64.4332			594.683	-63.5606			375.312	-1.79163			505.123	-64.5159			308.108	-65.6983			371.779	-65.1095			264.406	-66.1777			387.697
	413.588	-64.8801			502.136	-64.4681			355.918	-65.464			531.061	-63.8281			721.969	-10.0364			456.429	-64.4717			594.733	-63.5897			375.362	-1.80502			505.173	-64.553			308.158	-65.7412			371.829	-65.1543			264.456	-66.2303			387.747
	413.638	-64.9157			502.186	-64.5072			355.968	-65.5087			531.111	-63.8587			731.969	-12.9212			456.479	-64.5103			594.783	-63.6188			375.412	-1.81842			505.223	-64.5901			308.208	-65.7841			371.879	-65.1992			264.506	-66.283			387.797
	413.688	-64.9514			502.236	-64.5463			356.018	-65.5534			531.161	-63.8892			741.969	-15.627			456.529	-64.5488			594.833	-63.648			375.462	-1.83183			505.273	-64.6273			308.258	-65.8271			371.929	-65.2441			264.556	-66.3358			387.847
	413.738	-64.9871			502.286	-64.5855			356.068	-65.5982			531.211	-63.9198			751.969	-18.0329			456.579	-64.5875			594.883	-63.6772			375.512	-1.84524			505.323	-64.6645			308.308	-65.8701			371.979	-65.289			264.606	-66.3886			387.897
	413.788	-65.0229			502.336	-64.6248			356.118	-65.6431			531.261	-63.9505			761.969	-20.0035			456.629	-64.6262			594.933	-63.7065			375.562	-1.85866			505.373	-64.7018			308.358	-65.9132			372.029	-65.3341			264.656	-66.4414			387.947
	413.838	-65.0587			502.386	-64.6641			356.168	-65.688			531.311	-63.9811			771.969	-21.438			456.679	-64.665			594.983	-63.7357			375.612	-1.87208			505.423	-64.7391			308.408	-65.9562			372.079	-65.3791			264.706	-66.4943			387.997
	413.888	-65.0946			502.436	-64.7035			356.218	-65.7329			531.361	-64.0119			781.969	-22.3091			456.729	-64.7038			595.033	-63.7651			375.662	-1.88551			505.473	-64.7765			308.458	-65.9993			372.129	-65.4243			264.756	-66.5472			388.047
	413.938	-65.1305			502.486	-64.7429			356.268	-65.7779			531.411	-64.0426			791.969	-22.641			456.779	-64.7427			595.083	-63.7944			375.712	-1.89894			505.523	-64.814			308.508	-66.0425			372.179	-65.4695			264.806	-66.6002			388.097
	413.988	-65.1664			502.536	-64.7825			356.318	-65.823			531.461	-64.0734			801.969	-22.446			456.829	-64.7816			595.133	-63.8238			375.762	-1.91237			505.573	-64.8515			308.558	-66.0857			372.229	-65.5148			264.856	-66.6532			388.147
	414.038	-65.2024			502.586	-64.822			356.368	-65.8681			531.511	-64.1043			811.969	-21.663			456.879	-64.8206			595.183	-63.8533			375.812	-1.92581			505.623	-64.8891			308.608	-66.1289			372.279	-65.5601			264.906	-66.7063			388.197
	414.088	-65.2384			502.636	-64.8617			356.418	-65.9133			531.561	-64.1351			821.969	-20.092			456.929	-64.8597			595.233	-63.8828			375.862	-1.93925			505.673	-64.9267			308.658	-66.1722			372.329	-65.6055			264.956	-66.7594			388.247
	414.138	-65.2745			502.686	-64.9014			356.468	-65.9586			531.611	-64.1661			831.969	-17.2457			456.979	-64.8988			595.283	-63.9123			375.912	-1.9527			505.723	-64.9644			308.708	-66.2154			372.379	-65.651			265.006	-66.8126			388.297
	414.188	-65.3106			502.736	-64.9412			356.518	-66.0039			531.661	-64.197			841.969	-11.6637			457.029	-64.938			595.333	-63.9419			375.962	-1.96614			505.773	-65.0022			308.758	-66.2588			372.429	-65.6965			265.056	-66.8658			388.347
	414.238	-65.3468			502.786	-64.981			356.568	-66.0493			531.711	-64.2281			845.014	-8.64169			457.079	-64.9773			595.383	-63.9715			376.012	-1.9796			505.823	-65.04			308.808	-66.3021			372.479	-65.7421			265.106	-66.9191			388.397
	414.288	-65.3829			502.836	-65.0209			356.618	-66.0947			531.761	-64.2591			847.287	-5.36105			457.129	-65.0166			595.433	-64.0011			376.062	-1.99305			505.873	-65.0779			308.858	-66.3455			372.529	-65.7878			265.156	-66.9724			388.447
	414.338	-65.4192			502.886	-65.0609			356.668	-66.1402			531.811	-64.2902			849.56	-0.772222			457.179	-65.0559			595.483	-64.0308			376.112	-2.00652			505.923	-65.1159			308.908	-66.389			372.579	-65.8335			265.206	-67.0258			388.497
	414.388	-65.4555			502.936	-65.1009			356.718	-66.1857			531.861	-64.3213			851.833	4.90041			457.229	-65.0954			595.533	-64.0606			376.162	-2.01998			505.973	-65.1539			308.958	-66.4325			372.629	-65.8793			265.256	-67.0792			388.547
	414.438	-65.4918			502.986	-65.141			356.768	-66.2313			531.911	-64.3525			854.106	10.324			457.279	-65.1348			595.583	-64.0903			376.212	-2.03345			506.023	-65.192			309.008	-66.476			372.679	-65.9251			265.306	-67.1326			388.597
	414.488	-65.5281			503.036	-65.1812			356.818	-66.277			531.961	-64.3837			856.379	14.6533			457.329	-65.1744			595.633	-64.1202			376.262	-2.04692			506.073	-65.2301			309.058	-66.5195			372.729	-65.971			265.356	-67.1861			388.647
	414.538	-65.5645			503.086	-65.2214			356.868	-66.3227			532.011	-64.415			858.651	17.9166			457.379	-65.214			595.683	-64.15			376.312	-2.06039			506.123	-65.2683			309.108	-66.5631			372.779	-66.017			265.406	-67.2397			388.697
	414.588	-65.601			503.136	-65.2617			356.918	-66.3685			532.061	-64.4463			860.924	20.3531			457.429	-65.2537			595.733	-64.1799			376.362	-2.07387			506.173	-65.3066			309.158	-66.6067			372.829	-66.063			265.456	-67.2933			388.747
	414.638	-65.6375			503.186	-65.3021			356.968	-66.4143			532.111	-64.4776			868.137	24.6719			457.479	-65.2934			595.783	-64.2099			376.412	-2.08734			506.223	-65.3449			309.208	-66.6504			372.879	-66.1091			265.506	-67.3469			388.797
	414.688	-65.674			503.236	-65.3426			357.018	-66.4602			532.161	-64.509			877.869	26.2131			457.529	-65.3332			595.833	-64.2398			376.462	-2.10083			506.273	-65.3833			309.258	-66.6941			372.929	-66.1552			265.556	-67.4006			388.847
	414.738	-65.7106			503.286	-65.3831			357.068	-66.5062			532.211	-64.5404			887.869	25.6432			457.579	-65.373			595.883	-64.2699			376.512	-2.11431			506.323	-65.4217			309.308	-66.7378			372.979	-66.2014			265.606	-67.4543			388.897
	414.788	-65.7472			503.336	-65.4236			357.118	-66.5522			532.261	-64.5719			897.869	24.1451			457.629	-65.413			595.933	-64.2999			386.512	-4.86335			506.373	-65.4602			309.358	-66.7816			373.029	-66.2477			265.656	-67.5081			388.947
	414.838	-65.7838			503.386	-65.4643			357.168	-66.5982			532.311	-64.6034			907.869	22.2284			457.679	-65.4529			595.983	-64.33			396.512	-7.65112			506.423	-65.4988			309.408	-66.8254			373.079	-66.2941			265.706	-67.5619			388.997
	414.888	-65.8205			503.436	-65.505			357.218	-66.6444			532.361	-64.635			917.869	20.1141			457.729	-65.493			596.033	-64.3602			406.512	-10.4146			506.473	-65.5374			309.458	-66.8692			373.129	-66.3405			265.756	-67.6158			389.047
	414.938	-65.8573			503.486	-65.5457			357.268	-66.6906			532.411	-64.6665			927.869	17.8987			457.779	-65.5331			596.083	-64.3904			416.512	-13.0794			506.523	-65.5761			309.508	-66.9131			373.179	-66.3869			265.806	-67.6697			389.097
	414.988	-65.894			503.536	-65.5866			357.318	-66.7368			532.461	-64.6982			937.869	15.6211			457.829	-65.5732			596.133	-64.4206			426.512	-15.5591			506.573	-65.6149			309.558	-66.957			373.229	-66.4335			265.856	-67.7236			389.147
	415.038	-65.9309			503.586	-65.6275			357.368	-66.7831			532.511	-64.7299			947.869	13.2931			457.879	-65.6135			596.183	-64.4509			436.512	-17.7466			506.623	-65.6537			309.608	-67.0009			373.279	-66.4801			265.906	-67.7776			389.197
	415.088	-65.9677			503.636	-65.6685			357.418	-66.8295			532.561	-64.7616			957.869	10.9136			457.929	-65.6537			596.233	-64.4812			446.512	-19.5281			506.673	-65.6926			309.658	-67.0449			373.329	-66.5267			265.956	-67.8317			389.247
	415.138	-66.0046			503.686	-65.7095			357.468	-66.8759			532.611	-64.7934			967.869	8.47553			457.979	-65.6941			596.283	-64.5116			456.512	-20.8152			506.723	-65.7315			309.708	-67.0889			373.379	-66.5735			266.006	-67.8858			389.297
	415.188	-66.0416			503.736	-65.7506			357.518	-66.9224			532.661	-64.8252			977.869	5.96765			458.029	-65.7345			596.333	-64.542			466.512	-21.566			506.773	-65.7705			309.758	-67.133			373.429	-66.6202			266.056	-67.9399			389.347
	415.238	-66.0786			503.786	-65.7918			357.568	-66.969			532.711	-64.857			987.869	3.37564			458.079	-65.775			596.383	-64.5724			476.512	-21.7713			506.823	-65.8096			309.808	-67.1771			373.479	-66.6671			266.106	-67.9941			389.397
	415.288	-66.1156			503.836	-65.833			357.618	-67.0156			532.761	-64.8889			997.869	0.683244			458.129	-65.8155			596.433	-64.6029			486.512	-21.4096			506.873	-65.8488			309.858	-67.2212			373.529	-66.714			266.156	-68.0484			389.447
	415.338	-66.1527			503.886	-65.8744			357.668	-67.0622			532.811	-64.9208			998.914	0.395668			458.179	-65.8561			596.483	-64.6335			496.512	-20.3903			506.923	-65.888			309.908	-67.2654			373.579	-66.761			266.206	-68.1026			389.497
	415.388	-66.1898			503.936	-65.9157			357.718	-67.109			532.861	-64.9528			998.964	0.382025			458.229	-65.8968			596.533	-64.664			506.512	-18.4854			506.973	-65.9272			309.958	-67.3096			373.629	-66.808			266.256	-68.157			389.547
	415.438	-66.227			503.986	-65.9572			357.768	-67.1558			532.911	-64.9848			999.014	0.368376			458.279	-65.9375			596.583	-64.6946			516.512	-15.1788			507.023	-65.9666			310.008	-67.3538			373.679	-66.8551			266.306	-68.2113			389.597
	415.488	-66.2642			504.036	-65.9987			357.818	-67.2026			532.961	-65.0169			999.064	0.354721			458.329	-65.9783			596.633	-64.7253			525.758	-9.54661			507.073	-66.0059			310.058	-67.3981			373.729	-66.9023			266.356	-68.2657			389.647
	415.538	-66.3015			504.086	-66.0403			357.868	-67.2495			533.011	-65.049			999.114	0.341059			458.379	-66.0191			596.683	-64.756			528.218	-7.09453			507.123	-66.0454			310.108	-67.4424			373.779	-66.9495			266.406	-68.3202			389.697
	415.588	-66.3388			504.136	-66.082			357.918	-67.2965			533.061	-65.0812			999.164	0.327392			458.429	-66.06			596.733	-64.7868			530.678	-3.82001			507.173	-66.0849			310.158	-67.4867			373.829	-66.9968			266.456	-68.3747			389.747
	415.638	-66.3761			504.186	-66.1237			357.968	-67.3435			533.111	-65.1134			999.214	0.313719			458.479	-66.101			596.783	-64.8175			533.138	0.408706			507.223	-66.1245			310.208	-67.5311			373.879	-67.0442			266.506	-68.4292			389.797
	415.688	-66.4135			504.236	-66.1655			358.018	-67.3906			533.161	-65.1456			999.264	0.300041			458.529	-66.142			596.833	-64.8484			535.598	5.15813			507.273	-66.1642			310.258	-67.5755			373.929	-67.0916			266.556	-68.4838			389.847
	415.738	-66.4509			504.286	-66.2073			358.068	-67.4377			533.211	-65.1779			999.314	0.286357			458.579	-66.1831			596.883	-64.8793			538.058	9.54761			507.323	-66.2039			310.308	-67.62			373.979	-67.1391			266.606	-68.5385			389.897
	415.788	-66.4884			504.336	-66.2493			358.118	-67.4849			533.261	-65.2102			999.364	0.272668			458.629	-66.2243			596.933	-64.9102			540.518	13.131			507.373	-66.2437			310.358	-67.6644			374.029	-67.1867			266.656	-68.5931			389.947
	415.838	-66.5259			504.386	-66.2913			358.168	-67.5322			533.311	-65.2426			999.414	0.258974			458.679	-66.2655			596.983	-64.9411			542.978	15.9236			507.423	-66.2835			310.408	-67.709			374.079	-67.2343			266.706	-68.6478			389.997
	415.888	-66.5635			504.436	-66.3333			358.218	-67.5795			533.361	-65.275			999.464	0.245275			458.729	-66.3068			597.033	-64.9721			546.915	19.1138			507.473	-66.3234			310.458	-67.7535			374.129	-67.282			266.756	-68.7026			390.047
	415.938	-66.6011			504.486	-66.3755			358.268	-67.6269			533.411	-65.3075			999.514	0.231571			458.779	-66.3482			597.083	-65.0032			556.758	22.8242			507.523	-66.3634			310.508	-67.7981			374.179	-67.3297			266.806	-68.7574			390.097
	415.988	-66.6387			504.536	-66.4177			358.318	-67.6744			533.461	-65.34							458.829	-66.3896			597.133	-65.0343			566.758	23.4385			507.573	-66.4034			310.558	-67.8427			374.229	-67.3775			266.856	-68.8123			390.147
	416.038	-66.6764			504.586	-66.46			358.368	-67.7219			533.511	-65.3725							458.879	-66.4311			597.183	-65.0654			576.758	22.6366			507.623	-66.4435			310.608	-67.8874			374.279	-67.4254			266.906	-68.8672			390.197
	416.088	-66.7141			504.636	-66.5023			358.418	-67.7694			533.561	-65.4051							458.929	-66.4726			597.233	-65.0966			586.758	21.152			507.673	-66.4837			310.658	-67.9321			374.329	-67.4733			266.956	-68.9221			390.247
	416.138	-66.7519			504.686	-66.5447			358.468	-67.8171			533.611	-65.4377							458.979	-66.5143			597.283	-65.1278			596.758	19.32			507.723	-66.5239			310.708	-67.9768			374.379	-67.5213			267.006	-68.9771			390.297
	416.188	-66.7897			504.736	-66.5872			358.518	-67.8647			533.661	-65.4704							459.029	-66.5559			597.333	-65.1591			606.758	17.3			507.773	-66.5642			310.758	-68.0216			374.429	-67.5694			267.056	-69.0321			390.347
	416.238	-66.8276			504.786	-66.6298			358.568	-67.9125			533.711	-65.5031							459.079	-66.5977			597.383	-65.1904			616.758	15.1683			507.823	-66.6046			310.808	-68.0664			374.479	-67.6175			267.106	-69.0871			390.397
	416.288	-66.8655			504.836	-66.6724			358.618	-67.9603			533.761	-65.5359							459.129	-66.6395			597.433	-65.2218			626.758	12.9596			507.873	-66.645			310.858	-68.1113			374.529	-67.6657			267.156	-69.1422			390.447
	416.338	-66.9035			504.886	-66.7151			358.668	-68.0082			533.811	-65.5687							459.179	-66.6814			597.483	-65.2532			636.758	10.688			507.923	-66.6855			310.908	-68.1561			374.579	-67.714			267.206	-69.1974			390.497
	416.388	-66.9415			504.936	-66.7579			358.718	-68.0561			533.861	-65.6016							459.229	-66.7233			597.533	-65.2846			646.758	8.35663			507.973	-66.7261			310.958	-68.2011			374.629	-67.7623			267.256	-69.2526			390.547
	416.438	-66.9795			504.986	-66.8007			358.768	-68.1041			533.911	-65.6345							459.279	-66.7653			597.583	-65.3161			656.758	5.9624			508.023	-66.7667			311.008	-68.246			374.679	-67.8107			267.306	-69.3078			390.597
	416.488	-67.0176			505.036	-66.8436			358.818	-68.1521			533.961	-65.6674							459.329	-66.8074			597.633	-65.3477			666.758	3.49771			508.073	-66.8074			311.058	-68.291			374.729	-67.8591			267.356	-69.3631			390.647
	416.538	-67.0557			505.086	-66.8866			358.868	-68.2002			534.011	-65.7004							459.379	-66.8495			597.683	-65.3793			676.758	0.952582			508.123	-66.8482			311.108	-68.336			374.779	-67.9076			267.406	-69.4184			390.697
	416.588	-67.0939			505.136	-66.9297			358.918	-68.2484			534.061	-65.7334							459.429	-66.8917			597.733	-65.4109			686.758	-1.6799			508.173	-66.889			311.158	-68.3811			374.829	-67.9562			267.456	-69.4737			390.747
	416.638	-67.1321			505.186	-66.9728			358.968	-68.2966			534.111	-65.7665							459.479	-66.9339			597.783	-65.4426			686.808	-1.69314			508.223	-66.9299			311.208	-68.4262			374.879	-68.0048			267.506	-69.5291			390.797
	416.688	-67.1704			505.236	-67.016			359.018	-68.3449			534.161	-65.7997							459.529	-66.9763			597.833	-65.4743			686.857	-1.70639			508.273	-66.9708			311.258	-68.4713			374.929	-68.0535			267.556	-69.5845			390.847
	416.738	-67.2087			505.286	-67.0593			359.068	-68.3932			534.211	-65.8328							459.579	-67.0186			597.883	-65.506			686.908	-1.71965			508.323	-67.0118			311.308	-68.5164			374.979	-68.1023			267.606	-69.64			390.897
	416.788	-67.247			505.336	-67.1026			359.118	-68.4416			534.261	-65.866							459.629	-67.0611			597.933	-65.5378			686.957	-1.73292			508.373	-67.0529			311.358	-68.5616			375.029	-68.1511			267.656	-69.6955			390.947
	416.838	-67.2854			505.386	-67.146			359.168	-68.49			534.311	-65.8993							459.679	-67.1036			597.983	-65.5697			687.008	-1.74618			508.423	-67.0941			311.408	-68.6069			375.079	-68.2			267.706	-69.751			390.997
	416.888	-67.3238			505.436	-67.1895			359.218	-68.5386			534.361	-65.9326							459.729	-67.1462			598.033	-65.6016			687.058	-1.75946			508.473	-67.1353			311.458	-68.6521			375.129	-68.249			267.756	-69.8066			391.047
	416.938	-67.3623			505.486	-67.233			359.268	-68.5871			534.411	-65.966							459.779	-67.1889			598.083	-65.6335			687.107	-1.77274			508.523	-67.1766			311.508	-68.6974			375.179	-68.298			267.806	-69.8622			391.097
	416.988	-67.4008			505.536	-67.2766			359.318	-68.6358			534.461	-65.9994							459.829	-67.2316			598.133	-65.6655			687.158	-1.78602			508.573	-67.218			311.558	-68.7427			375.229	-68.3471			267.856	-69.9179			391.147
	417.038	-67.4394			505.586	-67.3203			359.368	-68.6845			534.511	-66.0328							459.879	-67.2743			598.183	-65.6976			687.207	-1.79931			508.623	-67.2594			311.608	-68.7881			375.279	-68.3962			267.906	-69.9736			391.197
	417.088	-67.478			505.636	-67.3641			359.418	-68.7332			534.561	-66.0663							459.929	-67.3172			598.233	-65.7296			687.258	-1.8126			508.673	-67.3009			311.658	-68.8335			375.329	-68.4454			267.956	-70.0293			391.247
	417.138	-67.5167			505.686	-67.4079			359.468	-68.782			534.611	-66.0998							459.979	-67.3601			598.283	-65.7618			687.308	-1.82589			508.723	-67.3424			311.708	-68.8789			375.379	-68.4947			268.006	-70.0851			391.297
	417.188	-67.5554			505.736	-67.4518			359.518	-68.8309			534.661	-66.1334							460.029	-67.4031			598.333	-65.7939			687.357	-1.83919			508.773	-67.3841			311.758	-68.9244			375.429	-68.544			268.056	-70.1409			391.347
	417.238	-67.5941			505.786	-67.4958			359.568	-68.8798			534.711	-66.167							460.079	-67.4461			598.383	-65.8261			687.408	-1.85249			508.823	-67.4257			311.808	-68.9699			375.479	-68.5934			268.106	-70.1967			391.397
	417.288	-67.6329			505.836	-67.5398			359.618	-68.9288			534.761	-66.2007							460.129	-67.4892			598.433	-65.8584			687.457	-1.8658			508.873	-67.4675			311.858	-69.0154			375.529	-68.6429			268.156	-70.2526			391.447
	417.338	-67.6717			505.886	-67.5839			359.668	-68.9778			534.811	-66.2344							460.179	-67.5324			598.483	-65.8907			687.508	-1.87911			508.923	-67.5093			311.908	-69.061			375.579	-68.6924			268.206	-70.3085			391.497
	417.388	-67.7106			505.936	-67.6281			359.718	-69.0269			534.861	-66.2682							460.229	-67.5756			598.533	-65.9231			687.558	-1.89243			508.973	-67.5512			311.958	-69.1066			375.629	-68.742			268.256	-70.3645			391.547
	417.438	-67.7495			505.986	-67.6724			359.768	-69.0761			534.911	-66.302							460.279	-67.619			598.583	-65.9555			687.607	-1.90575			509.023	-67.5932			312.008	-69.1522			375.679	-68.7916			268.306	-70.4205			391.597
	417.488	-67.7885			506.036	-67.7167			359.818	-69.1253			534.961	-66.3358							460.329	-67.6623			598.633	-65.9879			687.658	-1.91907			509.073	-67.6352			312.058	-69.1979			375.729	-68.8413			268.356	-70.4765			391.647
	417.538	-67.8275			506.086	-67.7611			359.868	-69.1746			535.011	-66.3697							460.379	-67.7058			598.683	-66.0204			687.707	-1.93239			509.123	-67.6773			312.108	-69.2436			375.779	-68.8911			268.406	-70.5325			391.697
	417.588	-67.8665			506.136	-67.8056			359.918	-69.2239			535.061	-66.4037							460.429	-67.7493			598.733	-66.0529			687.758	-1.94572			509.173	-67.7195			312.158	-69.2893			375.829	-68.9409			268.456	-70.5886			391.747
	417.638	-67.9056			506.186	-67.8501			359.968	-69.2733			535.111	-66.4377							460.479	-67.7928			598.783	-66.0855			687.808	-1.95905			509.223	-67.7617			312.208	-69.3351			375.879	-68.9908			268.506	-70.6447			391.797
	417.688	-67.9448			506.236	-67.8947			360.018	-69.3227			535.161	-66.4717							460.529	-67.8365			598.833	-66.1181			687.857	-1.97239			509.273	-67.804			312.258	-69.3809			375.929	-69.0408			268.556	-70.7009			391.847
	417.738	-67.984			506.286	-67.9394			360.068	-69.3722			535.211	-66.5058							460.579	-67.8802			598.883	-66.1508			687.908	-1.98572			509.323	-67.8463			312.308	-69.4267			375.979	-69.0908			268.606	-70.757			391.897
	417.788	-68.0232			506.336	-67.9842			360.118	-69.4218			535.261	-66.5399							460.629	-67.9239			598.933	-66.1835			687.957	-1.99906			509.373	-67.8888			312.358	-69.4726			376.029	-69.1409			268.656	-70.8133			391.947
	417.838	-68.0625			506.386	-68.029			360.168	-69.4714			535.311	-66.5741							460.679	-67.9678			598.983	-66.2163			688.008	-2.01241			509.423	-67.9313			312.408	-69.5185			376.079	-69.191			268.706	-70.8695			391.997
	417.888	-68.1018			506.436	-68.0739			360.218	-69.5211			535.361	-66.6083							460.729	-68.0117			599.033	-66.2491			688.058	-2.02575			509.473	-67.9738			312.458	-69.5644			376.129	-69.2412			268.756	-70.9258			392.047
	417.938	-68.1411			506.486	-68.1189			360.268	-69.5708			535.411	-66.6426							460.779	-68.0556			599.083	-66.282			688.107	-2.0391			509.523	-68.0165			312.508	-69.6104			376.179	-69.2915			268.806	-70.9821			392.097
	417.988	-68.1806			506.536	-68.1639			360.318	-69.6206			535.461	-66.6769							460.829	-68.0997			599.133	-66.3149			688.158	-2.05246			509.573	-68.0592			312.558	-69.6564			376.229	-69.3418			268.856	-71.0384			392.147
	418.038	-68.22			506.586	-68.209			360.368	-69.6704			535.511	-66.7113							460.879	-68.1438			599.183	-66.3479			688.207	-2.06581			509.623	-68.1019			312.608	-69.7024			376.279	-69.3922			268.906	-71.0948			392.197
	418.088	-68.2595			506.636	-68.2542			360.418	-69.7203			535.561	-66.7457							460.929	-68.1879			599.233	-66.3809			688.258	-2.07917			509.673	-68.1448			312.658	-69.7485			376.329	-69.4426			268.956	-71.1512			392.247
	418.138	-68.299			506.686	-68.2995			360.468	-69.7703			535.611	-66.7802							460.979	-68.2321			599.283	-66.4139			688.308	-2.09253			509.723	-68.1877			312.708	-69.7946			376.379	-69.4931			269.006	-71.2076			392.297
	418.188	-68.3386			506.736	-68.3448			360.518	-69.8203			535.661	-66.8147							461.029	-68.2764			599.333	-66.447			688.357	-2.10589			509.773	-68.2306			312.758	-69.8407			376.429	-69.5437			269.056	-71.264			392.347
	418.238	-68.3782			506.786	-68.3902			360.568	-69.8704			535.711	-66.8492							461.079	-68.3208			599.383	-66.4801			692.388	-3.19565			509.823	-68.2737			312.808	-69.8868			376.479	-69.5943			269.106	-71.3205			392.397
	418.288	-68.4179			506.836	-68.4357			360.618	-69.9205			535.761	-66.8838							461.129	-68.3652			599.433	-66.5133			702.388	-5.93928			509.873	-68.3168			312.858	-69.933			376.529	-69.645			269.156	-71.377			392.447
	418.338	-68.4576			506.886	-68.4812			360.668	-69.9707			535.811	-66.9185							461.179	-68.4097			599.483	-66.5466			712.388	-8.69849			509.923	-68.36			312.908	-69.9792			376.579	-69.6957			269.206	-71.4335			392.497
	418.388	-68.4974			506.936	-68.5268			360.718	-70.0209			535.861	-66.9532							461.229	-68.4543			599.533	-66.5799			722.388	-11.4064			509.973	-68.4032			312.958	-70.0255			376.629	-69.7465			269.256	-71.4901			392.547
	418.438	-68.5372			506.986	-68.5725			360.768	-70.0712			535.911	-66.9879							461.279	-68.4989			599.583	-66.6132			732.388	-13.9868			510.023	-68.4465			313.008	-70.0717			376.679	-69.7974			269.306	-71.5467			392.597
	418.488	-68.577			507.036	-68.6183			360.818	-70.1215			535.961	-67.0227							461.329	-68.5436			599.633	-66.6466			742.388	-16.3468			510.073	-68.4899			313.058	-70.118			376.729	-69.8483			269.356	-71.6033			392.647
	418.538	-68.6169			507.086	-68.6641			360.868	-70.1719			536.011	-67.0575							461.379	-68.5884			599.683	-66.68			752.388	-18.3736			510.123	-68.5333			313.108	-70.1644			376.779	-69.8992			269.406	-71.6599			392.697
	418.588	-68.6569			507.136	-68.71			360.918	-70.2223			536.061	-67.0924							461.429	-68.6332			599.733	-66.7135			762.388	-19.9582			510.173	-68.5768			313.158	-70.2107			376.829	-69.9503			269.456	-71.7165			392.747
	418.638	-68.6968			507.186	-68.756			360.968	-70.2728			536.111	-67.1273							461.479	-68.6781			599.783	-66.747			772.388	-21.0266			510.223	-68.6204			313.208	-70.2571			376.879	-70.0014			269.506	-71.7732			392.797
	418.688	-68.7369			507.236	-68.802			361.018	-70.3234			536.161	-67.1623							461.529	-68.723			599.833	-66.7806			782.388	-21.5503			510.273	-68.6641			313.258	-70.3035			376.929	-70.0525			269.556	-71.8299			392.847
	418.738	-68.7769			507.286	-68.8481			361.068	-70.374			536.211	-67.1973							461.579	-68.768			599.883	-66.8142			792.388	-21.5195			510.323	-68.7078			313.308	-70.35			376.979	-70.1037			269.606	-71.8866			392.897
	418.788	-68.817			507.336	-68.8943			361.118	-70.4247			536.261	-67.2324							461.629	-68.8131			599.933	-66.8478			802.388	-20.8911			510.373	-68.7516			313.358	-70.3965			377.029	-70.155			269.656	-71.9434			392.947
	418.838	-68.8572			507.386	-68.9405			361.168	-70.4754			536.311	-67.2675							461.679	-68.8583			599.983	-66.8816			812.388	-19.5314			510.423	-68.7954			313.408	-70.443			377.079	-70.2063			269.706	-72.0001			392.997
	418.888	-68.8974			507.436	-68.9869			361.218	-70.5261			536.361	-67.3027							461.729	-68.9035			600.033	-66.9153			822.388	-17.1351			510.473	-68.8393			313.458	-70.4895			377.129	-70.2577			269.756	-72.0569			393.047
	418.938	-68.9376			507.486	-69.0333			361.268	-70.5769			536.411	-67.3379							461.779	-68.9488			600.083	-66.9491			832.388	-12.9781			510.523	-68.8833			313.508	-70.5361			377.179	-70.3091			269.806	-72.1137			393.097
	418.988	-68.9779			507.536	-69.0797			361.318	-70.6278			536.461	-67.3732							461.829	-68.9941			600.133	-66.983			839.305	-7.85916			510.573	-68.9274			313.558	-70.5827			377.229	-70.3606			269.856	-72.1705			393.147
	419.038	-69.0182			507.586	-69.1263			361.368	-70.6787			536.511	-67.4085							461.879	-69.0395			600.183	-67.0169			841.6	-5.22687			510.623	-68.9715			313.608	-70.6293			377.279	-70.4121			269.906	-72.2274			393.197
	419.088	-69.0586			507.636	-69.1729			361.418	-70.7297			536.561	-67.4438							461.929	-69.085			600.233	-67.0508			843.895	-1.85035			510.673	-69.0157			313.658	-70.6759			377.329	-70.4637			269.956	-72.2842			393.247
	419.138	-69.099			507.686	-69.2195			361.468	-70.7807			536.611	-67.4792							461.979	-69.1306			600.283	-67.0848			846.19	2.18393			510.723	-69.0599			313.708	-70.7226			377.379	-70.5153			270.006	-72.3411			393.297
	419.188	-69.1395			507.736	-69.2663			361.518	-70.8318			536.661	-67.5147							462.029	-69.1762			600.333	-67.1189			848.484	6.34577			510.773	-69.1043			313.758	-70.7693			377.429	-70.567			270.056	-72.398			393.347
	419.238	-69.18			507.786	-69.3131			361.568	-70.8829			536.711	-67.5502							462.079	-69.2218			600.383	-67.153			850.779	10.0601			510.823	-69.1486			313.808	-70.8161			377.479	-70.6188			270.106	-72.4549			393.397
	419.288	-69.2205			507.836	-69.36			361.618	-70.9341			536.761	-67.5857							462.129	-69.2676			600.433	-67.1871			853.074	13.1186			510.873	-69.1931			313.858	-70.8628			377.529	-70.6706			270.156	-72.5118			393.447
	419.338	-69.2611			507.886	-69.4069			361.668	-70.9853			536.811	-67.6213							462.179	-69.3134			600.483	-67.2213			855.369	15.5584			510.923	-69.2376			313.908	-70.9096			377.579	-70.7225			270.206	-72.5687			393.497
	419.388	-69.3017			507.936	-69.454			361.718	-71.0366			536.861	-67.657							462.229	-69.3593			600.533	-67.2556			861.823	19.9746			510.973	-69.2822			313.958	-70.9564			377.629	-70.7744			270.256	-72.6256			393.547
	419.438	-69.3424			507.986	-69.501			361.768	-71.0879			536.911	-67.6926							462.279	-69.4052			600.583	-67.2898			871.283	22.5231			511.023	-69.3269			314.008	-71.0032			377.679	-70.8264			270.306	-72.6826			393.597
	419.488	-69.3831			508.036	-69.5482			361.818	-71.1392			536.961	-67.7284							462.329	-69.4512			600.633	-67.3242			881.283	22.7572			511.073	-69.3716			314.058	-71.0501			377.729	-70.8784			270.356	-72.7395			393.647
	419.538	-69.4239			508.086	-69.5954			361.868	-71.1906			537.011	-67.7642							462.379	-69.4973			600.683	-67.3586			891.283	21.8018			511.123	-69.4164			314.108	-71.097			377.779	-70.9305			270.406	-72.7965			393.697
	419.588	-69.4647			508.136	-69.6427			361.918	-71.2421			537.061	-67.8							462.429	-69.5434			600.733	-67.393			901.283	20.2557			511.173	-69.4613			314.158	-71.1439			377.829	-70.9826			270.456	-72.8535			393.747
	419.638	-69.5055			508.186	-69.6901			361.968	-71.2936			537.111	-67.8359							462.479	-69.5896			600.783	-67.4275			911.283	18.4002			511.223	-69.5062			314.208	-71.1908			377.879	-71.0348			270.506	-72.9105			393.797
	419.688	-69.5464			508.236	-69.7375			362.018	-71.3452			537.161	-67.8718							462.529	-69.6358			600.833	-67.462			921.283	16.3716			511.273	-69.5512			314.258	-71.2378			377.929	-71.087			270.556	-72.9675			393.847
	419.738	-69.5873			508.286	-69.7851			362.068	-71.3968			537.211	-67.9078							462.579	-69.6822			600.883	-67.4966			931.283	14.2356			511.323	-69.5962			314.308	-71.2848			377.979	-71.1393			270.606	-73.0245			393.897
	419.788	-69.6283			508.336	-69.8326			362.118	-71.4484			537.261	-67.9438							462.629	-69.7285			600.933	-67.5312			941.283	12.0226			511.373	-69.6414			314.358	-71.3318			378.029	-71.1916			270.656	-73.0815			393.947
	419.838	-69.6693			508.386	-69.8803			362.168	-71.5001			537.311	-67.9799							462.679	-69.775			600.983	-67.5659			951.283	9.7448			511.423	-69.6865			314.408	-71.3788			378.079	-71.244			270.706	-73.1385			393.997
	419.888	-69.7103			508.436	-69.928			362.218	-71.5518			537.361	-68.016							462.729	-69.8215			601.033	-67.6006			961.283	7.40448			511.473	-69.7318			314.458	-71.4259			378.129	-71.2964			270.756	-73.1955			394.047
	419.938	-69.7514			508.486	-69.9758			362.268	-71.6036			537.411	-68.0522							462.779	-69.8681			601.083	-67.6354			971.283	4.9979			511.523	-69.7771			314.508	-71.473			378.179	-71.3488			270.806	-73.2526			394.097
	419.988	-69.7926			508.536	-70.0236			362.318	-71.6554			537.461	-68.0884							462.829	-69.9147			601.133	-67.6702			981.283	2.51716			511.573	-69.8225			314.558	-71.5201			378.229	-71.4014			270.856	-73.3096			394.147
	420.038	-69.8338			508.586	-70.0715			362.368	-71.7073			537.511	-68.1247							462.879	-69.9614			601.183	-67.7051			991.283	-0.0467902			511.623	-69.868			314.608	-71.5672			378.279	-71.4539			270.906	-73.3666			394.197
	420.088	-69.875			508.636	-70.1195			362.418	-71.7592			537.561	-68.161							462.929	-70.0082			601.233	-67.74			998.298	-1.897			511.673	-69.9135			314.658	-71.6143			378.329	-71.5065			270.956	-73.4237			394.247
	420.138	-69.9162			508.686	-70.1676			362.468	-71.8112			537.611	-68.1973							462.979	-70.055			601.283	-67.775			998.348	-1.91021			511.723	-69.9591			314.708	-71.6615			378.379	-71.5592			271.006	-73.4807			394.297
	420.188	-69.9576			508.736	-70.2157			362.518	-71.8632			537.661	-68.2337							463.029	-70.1019			601.333	-67.81			998.398	-1.92342			511.773	-70.0047			314.758	-71.7087			378.429	-71.6119			271.056	-73.5377			394.347
	420.238	-69.9989			508.786	-70.2639			362.568	-71.9152			537.711	-68.2702							463.079	-70.1489			601.383	-67.8451			998.448	-1.93664			511.823	-70.0505			314.808	-71.7559			378.479	-71.6647			271.106	-73.5948			394.397
	420.288	-70.0403			508.836	-70.3121			362.618	-71.9673			537.761	-68.3067							463.129	-70.1959			601.433	-67.8802			998.498	-1.94986			511.873	-70.0962			314.858	-71.8032			378.529	-71.7175			271.156	-73.6518			394.447
	420.338	-70.0817			508.886	-70.3604			362.668	-72.0194			537.811	-68.3432							463.179	-70.243			601.483	-67.9154			998.548	-1.96309			511.923	-70.1421			314.908	-71.8504			378.579	-71.7703			271.206	-73.7088			394.497
	420.388	-70.1232			508.936	-70.4088			362.718	-72.0716			537.861	-68.3799							463.229	-70.2901			601.533	-67.9506			998.598	-1.97632			511.973	-70.188			314.958	-71.8977			378.629	-71.8232			271.256	-73.7658			394.547
	420.438	-70.1647			508.986	-70.4573			362.768	-72.1238			537.911	-68.4165							463.279	-70.3373			601.583	-67.9858			998.648	-1.98956			512.023	-70.234			315.008	-71.945			378.679	-71.8761			271.306	-73.8229			394.597
	420.488	-70.2063			509.036	-70.5058			362.818	-72.176			537.961	-68.4532							463.329	-70.3846			601.633	-68.0212			998.698	-2.0028			512.073	-70.28			315.058	-71.9923			378.729	-71.9291			271.356	-73.8799			394.647
	420.538	-70.2478			509.086	-70.5544			362.868	-72.2283			538.011	-68.4899							463.379	-70.4319			601.683	-68.0565			998.748	-2.01604			512.123	-70.3261			315.108	-72.0396			378.779	-71.9821			271.406	-73.9369			394.697
	420.588	-70.2895			509.136	-70.603			362.918	-72.2806			538.061	-68.5267							463.429	-70.4793			601.733	-68.0919			998.798	-2.02929			512.173	-70.3723			315.158	-72.087			378.829	-72.0351			271.456	-73.9939			394.747
	420.638	-70.3312			509.186	-70.6517			362.968	-72.333			538.111	-68.5636							463.479	-70.5268			601.783	-68.1274			998.848	-2.04254			512.223	-70.4185			315.208	-72.1343			378.879	-72.0882			271.506	-74.0509			394.797
	420.688	-70.3729			509.236	-70.7005			363.018	-72.3854			538.161	-68.6005							463.529	-70.5743			601.833	-68.1629			998.898	-2.0558			512.273	-70.4648			315.258	-72.1817			378.929	-72.1414			271.556	-74.1078			394.847
	420.738	-70.4146			509.286	-70.7493			363.068	-72.4378			538.211	-68.6374							463.579	-70.6219			601.883	-68.1985			998.948	-2.06906			512.323	-70.5112			315.308	-72.2291			378.979	-72.1946			271.606	-74.1648			394.897
	420.788	-70.4564			509.336	-70.7982			363.118	-72.4903			538.261	-68.6744							463.629	-70.6695			601.933	-68.2341			998.998	-2.08233			512.373	-70.5576			315.358	-72.2766			379.029	-72.2478			271.656	-74.2218			394.947
	420.838	-70.4983			509.386	-70.8472			363.168	-72.5428			538.311	-68.7114							463.679	-70.7172			601.983	-68.2697			999.048	-2.09559			512.423	-70.6041			315.408	-72.324			379.079	-72.301			271.706	-74.2787			394.997
	420.888	-70.5401			509.436	-70.8962			363.218	-72.5953			538.361	-68.7485							463.729	-70.765			602.033	-68.3054			999.098	-2.10887			512.473	-70.6507			315.458	-72.3715			379.129	-72.3543			271.756	-74.3356			395.047
	420.938	-70.582			509.486	-70.9453			363.268	-72.6479			538.411	-68.7856							463.779	-70.8128			602.083	-68.3412			999.148	-2.12214			512.523	-70.6973			315.508	-72.4189			379.179	-72.4076			271.806	-74.3925			395.097
	420.988	-70.624			509.536	-70.9945			363.318	-72.7005			538.461	-68.8228							463.829	-70.8607			602.133	-68.377			999.198	-2.13542			512.573	-70.744			315.558	-72.4664			379.229	-72.461			271.856	-74.4494			395.147
	421.038	-70.666			509.586	-71.0437			363.368	-72.7532			538.511	-68.86							463.879	-70.9086			602.183	-68.4129			999.248	-2.1487			512.623	-70.7907			315.608	-72.5139			379.279	-72.5144			271.906	-74.5063			395.197
	421.088	-70.708			509.636	-71.093			363.418	-72.8058			538.561	-68.8973							463.929	-70.9566			602.233	-68.4488			999.298	-2.16199			512.673	-70.8375			315.658	-72.5614			379.329	-72.5678			271.956	-74.5632			395.247
	421.138	-70.7501			509.686	-71.1423			363.468	-72.8585			538.611	-68.9346							463.979	-71.0047			602.283	-68.4847			999.348	-2.17527			512.723	-70.8844			315.708	-72.609			379.379	-72.6213			272.006	-74.62			395.297
	421.188	-70.7922			509.736	-71.1917			363.518	-72.9113			538.661	-68.972							464.029	-71.0528			602.333	-68.5207			999.398	-2.18856			512.773	-70.9313			315.758	-72.6565			379.429	-72.6748			272.056	-74.6768			395.347
	421.238	-70.8344			509.786	-71.2412			363.568	-72.964			538.711	-69.0094							464.079	-71.1009			602.383	-68.5568			999.448	-2.20186			512.823	-70.9783			315.808	-72.7041			379.479	-72.7283			272.106	-74.7336			395.397
	421.288	-70.8766			509.836	-71.2907			363.618	-73.0168			538.761	-69.0469							464.129	-71.1492			602.433	-68.5929			999.498	-2.21516			512.873	-71.0254			315.858	-72.7517			379.529	-72.7819			272.156	-74.7904			395.447
	421.338	-70.9188			509.886	-71.3403			363.668	-73.0697			538.811	-69.0844							464.179	-71.1975			602.483	-68.629			999.548	-2.22845			512.923	-71.0725			315.908	-72.7993			379.579	-72.8355			272.206	-74.8472			395.497
	421.388	-70.961			509.936	-71.3899			363.718	-73.1225			538.861	-69.122							464.229	-71.2458			602.533	-68.6652							512.973	-71.1196			315.958	-72.8469			379.629	-72.8891			272.256	-74.9039			395.547
	421.438	-71.0033			509.986	-71.4396			363.768	-73.1754			538.911	-69.1596							464.279	-71.2942			602.583	-68.7015							513.023	-71.1669			316.008	-72.8945			379.679	-72.9428			272.306	-74.9606			395.597
	421.488	-71.0457			510.036	-71.4894			363.818	-73.2283			538.961	-69.1973							464.329	-71.3427			602.633	-68.7378							513.073	-71.2142			316.058	-72.9421			379.729	-72.9965			272.356	-75.0173			395.647
	421.538	-71.0881			510.086	-71.5392			363.868	-73.2812			539.011	-69.235							464.379	-71.3912			602.683	-68.7741							513.123	-71.2615			316.108	-72.9897			379.779	-73.0502			272.406	-75.0739			395.697
	421.588	-71.1305			510.136	-71.5891			363.918	-73.3342			539.061	-69.2727							464.429	-71.4398			602.733	-68.8105							513.173	-71.309			316.158	-73.0374			379.829	-73.104			272.456	-75.1305			395.747
	421.638	-71.1729			510.186	-71.639			363.968	-73.3872			539.111	-69.3105							464.479	-71.4884			602.783	-68.847							513.223	-71.3564			316.208	-73.085			379.879	-73.1577			272.506	-75.1871			395.797
	421.688	-71.2154			510.236	-71.689			364.018	-73.4402			539.161	-69.3484							464.529	-71.5371			602.833	-68.8835							513.273	-71.404			316.258	-73.1327			379.929	-73.2115			272.556	-75.2437			395.847
	421.738	-71.2579			510.286	-71.7391			364.068	-73.4932			539.211	-69.3863							464.579	-71.5858			602.883	-68.92							513.323	-71.4516			316.308	-73.1804			379.979	-73.2654			272.606	-75.3002			395.897
	421.788	-71.3005			510.336	-71.7892			364.118	-73.5463			539.261	-69.4242							464.629	-71.6346			602.933	-68.9566							513.373	-71.4992			316.358	-73.228			380.029	-73.3192			272.656	-75.3567			395.947
	421.838	-71.3431			510.386	-71.8393			364.168	-73.5994			539.311	-69.4622							464.679	-71.6835			602.983	-68.9932							513.423	-71.5469			316.408	-73.2757			380.079	-73.3731			272.706	-75.4131			395.997
	421.888	-71.3857			510.436	-71.8896			364.218	-73.6525			539.361	-69.5002							464.729	-71.7324			603.033	-69.0299							513.473	-71.5947			316.458	-73.3234			380.129	-73.427			272.756	-75.4695			396.047
	421.938	-71.4284			510.486	-71.9398			364.268	-73.7056			539.411	-69.5383							464.779	-71.7813			603.083	-69.0667							513.523	-71.6425			316.508	-73.3711			380.179	-73.4809			272.806	-75.5259			396.097
	421.988	-71.4711			510.536	-71.9902			364.318	-73.7587			539.461	-69.5765							464.829	-71.8303			603.133	-69.1035							513.573	-71.6904			316.558	-73.4189			380.229	-73.5348			272.856	-75.5822			396.147
	422.038	-71.5139			510.586	-72.0405			364.368	-73.8119			539.511	-69.6147							464.879	-71.8794			603.183	-69.1403							513.623	-71.7383			316.608	-73.4666			380.279	-73.5888			272.906	-75.6385			396.197
	422.088	-71.5567			510.636	-72.091			364.418	-73.8651			539.561	-69.6529							464.929	-71.9285			603.233	-69.1772							513.673	-71.7863			316.658	-73.5143			380.329	-73.6428			272.956	-75.6948			396.247
	422.138	-71.5995			510.686	-72.1415			364.468	-73.9183			539.611	-69.6912							464.979	-71.9777			603.283	-69.2141							513.723	-71.8344			316.708	-73.562			380.379	-73.6968			273.006	-75.751			396.297
	422.188	-71.6423			510.736	-72.192			364.518	-73.9715			539.661	-69.7295							465.029	-72.0269			603.333	-69.2511							513.773	-71.8825			316.758	-73.6098			380.429	-73.7508			273.056	-75.8072			396.347
	422.238	-71.6852			510.786	-72.2426			364.568	-74.0247			539.711	-69.7679							465.079	-72.0762			603.383	-69.2882							513.823	-71.9307			316.808	-73.6575			380.479	-73.8048			273.106	-75.8633			396.397
	422.288	-71.7281			510.836	-72.2932			364.618	-74.0779			539.761	-69.8063							465.129	-72.1255			603.433	-69.3252							513.873	-71.9789			316.858	-73.7052			380.529	-73.8589			273.156	-75.9193			396.447
	422.338	-71.7711			510.886	-72.3439			364.668	-74.1312			539.811	-69.8447							465.179	-72.1749			603.483	-69.3624							513.923	-72.0272			316.908	-73.753			380.579	-73.9129			273.206	-75.9754			396.497
	422.388	-71.8141			510.936	-72.3947			364.718	-74.1845			539.861	-69.8833							465.229	-72.2243			603.533	-69.3996							513.973	-72.0755			316.958	-73.8007			380.629	-73.967			273.256	-76.0313			396.547
	422.438	-71.8571			510.986	-72.4455			364.768	-74.2378			539.911	-69.9218							465.279	-72.2737			603.583	-69.4368							514.023	-72.1239			317.008	-73.8485			380.679	-74.0211			273.306	-76.0873			396.597
	422.488	-71.9001			511.036	-72.4963			364.818	-74.291			539.961	-69.9604							465.329	-72.3233			603.633	-69.4741							514.073	-72.1723			317.058	-73.8962			380.729	-74.0752			273.356	-76.1431			396.647
	422.538	-71.9432			511.086	-72.5472			364.868	-74.3443			540.011	-69.9991							465.379	-72.3728			603.683	-69.5114							514.123	-72.2208			317.108	-73.944			380.779	-74.1293			273.406	-76.1989			396.697
	422.588	-71.9863			511.136	-72.5982			364.918	-74.3977			540.061	-70.0378							465.429	-72.4225			603.733	-69.5488							514.173	-72.2693			317.158	-73.9917			380.829	-74.1834			273.456	-76.2547			396.747
	422.638	-72.0295			511.186	-72.6492			364.968	-74.451			540.111	-70.0765							465.479	-72.4721			603.783	-69.5862							514.223	-72.3179			317.208	-74.0395			380.879	-74.2375			273.506	-76.3104			396.797
	422.688	-72.0727			511.236	-72.7002			365.018	-74.5043			540.161	-70.1153							465.529	-72.5218			603.833	-69.6237							514.273	-72.3666			317.258	-74.0873			380.929	-74.2917			273.556	-76.366			396.847
	422.738	-72.1159			511.286	-72.7513			365.068	-74.5576			540.211	-70.1542							465.579	-72.5716			603.883	-69.6612							514.323	-72.4153			317.308	-74.135			380.979	-74.3458			273.606	-76.4216			396.897
	422.788	-72.1591			511.336	-72.8024			365.118	-74.611			540.261	-70.193							465.629	-72.6214			603.933	-69.6988							514.373	-72.464			317.358	-74.1828			381.029	-74.4			273.656	-76.4772			396.947
	422.838	-72.2024			511.386	-72.8536			365.168	-74.6643			540.311	-70.232							465.679	-72.6713			603.983	-69.7364							514.423	-72.5128			317.408	-74.2305			381.079	-74.4541			273.706	-76.5326			396.997
	422.888	-72.2457			511.436	-72.9048			365.218	-74.7177			540.361	-70.271							465.729	-72.7212			604.033	-69.7741							514.473	-72.5617			317.458	-74.2782			381.129	-74.5083			273.756	-76.588			397.047
	422.938	-72.2891			511.486	-72.9561			365.268	-74.771			540.411	-70.31							465.779	-72.7711			604.083	-69.8118							514.523	-72.6106			317.508	-74.326			381.179	-74.5624			273.806	-76.6434			397.097
	422.988	-72.3324			511.536	-73.0074			365.318	-74.8244			540.461	-70.3491							465.829	-72.8211			604.133	-69.8496							514.573	-72.6595			317.558	-74.3737			381.229	-74.6166			273.856	-76.6986			397.147
	423.038	-72.3758			511.586	-73.0587			365.368	-74.8777			540.511	-70.3882							465.879	-72.8711			604.183	-69.8874							514.623	-72.7085			317.608	-74.4214			381.279	-74.6708			273.906	-76.7538			397.197
	423.088	-72.4193			511.636	-73.1101			365.418	-74.9311			540.561	-70.4273							465.929	-72.9212			604.233	-69.9253							514.673	-72.7576			317.658	-74.4692			381.329	-74.7249			273.956	-76.809			397.247
	423.138	-72.4627			511.686	-73.1615			365.468	-74.9844			540.611	-70.4665							465.979	-72.9713			604.283	-69.9632							514.723	-72.8067			317.708	-74.5169			381.379	-74.7791			274.006	-76.864			397.297
	423.188	-72.5062			511.736	-73.213			365.518	-75.0378			540.661	-70.5058							466.029	-73.0215			604.333	-70.0012							514.773	-72.8558			317.758	-74.5646			381.429	-74.8332			274.056	-76.919			397.347
	423.238	-72.5497			511.786	-73.2645			365.568	-75.0911			540.711	-70.5451							466.079	-73.0717			604.383	-70.0392							514.823	-72.905			317.808	-74.6123			381.479	-74.8874			274.106	-76.9739			397.397
	423.288	-72.5933			511.836	-73.3161			365.618	-75.1444			540.761	-70.5844							466.129	-73.1219			604.433	-70.0772							514.873	-72.9542			317.858	-74.66			381.529	-74.9415			274.156	-77.0288			397.447
	423.338	-72.6369			511.886	-73.3677			365.668	-75.1978			540.811	-70.6238							466.179	-73.1722			604.483	-70.1153							514.923	-73.0035			317.908	-74.7077			381.579	-74.9957			274.206	-77.0835			397.497
	423.388	-72.6805			511.936	-73.4193			365.718	-75.2511			540.861	-70.6633							466.229	-73.2225			604.533	-70.1535							514.973	-73.0528			317.958	-74.7554			381.629	-75.0498			274.256	-77.1382			397.547
	423.438	-72.7241			511.986	-73.4709			365.768	-75.3044			540.911	-70.7027							466.279	-73.2729			604.583	-70.1917							515.023	-73.1022			318.008	-74.803			381.679	-75.1039			274.306	-77.1928			397.597
	423.488	-72.7678			512.036	-73.5226			365.818	-75.3577			540.961	-70.7423							466.329	-73.3233			604.633	-70.2299							515.073	-73.1516			318.058	-74.8507			381.729	-75.158			274.356	-77.2474			397.647
	423.538	-72.8114			512.086	-73.5744			365.868	-75.411			541.011	-70.7818							466.379	-73.3737			604.683	-70.2682							515.123	-73.2011			318.108	-74.8983			381.779	-75.2121			274.406	-77.3018			397.697
	423.588	-72.8552			512.136	-73.6261			365.918	-75.4643			541.061	-70.8215							466.429	-73.4242			604.733	-70.3066							515.173	-73.2506			318.158	-74.946			381.829	-75.2662			274.456	-77.3562			397.747
	423.638	-72.8989			512.186	-73.6779			365.968	-75.5176			541.111	-70.8611							466.479	-73.4747			604.783	-70.345							515.223	-73.3001			318.208	-74.9936			381.879	-75.3203			274.506	-77.4104			397.797
	423.688	-72.9427			512.236	-73.7298			366.018	-75.5709			541.161	-70.9008							466.529	-73.5252			604.833	-70.3834							515.273	-73.3497			318.258	-75.0412			381.929	-75.3744			274.556	-77.4646			397.847
	423.738	-72.9864			512.286	-73.7816			366.068	-75.6241			541.211	-70.9406							466.579	-73.5758			604.883	-70.4219							515.323	-73.3993			318.308	-75.0888			381.979	-75.4284			274.606	-77.5187			397.897
	423.788	-73.0303			512.336	-73.8335			366.118	-75.6773			541.261	-70.9804							466.629	-73.6264			604.933	-70.4605							515.373	-73.449			318.358	-75.1364			382.029	-75.4824			274.656	-77.5728			397.947
	423.838	-73.0741			512.386	-73.8854			366.168	-75.7306			541.311	-71.0202							466.679	-73.677			604.983	-70.499							515.423	-73.4987			318.408	-75.1839			382.079	-75.5364			274.706	-77.6267			397.997
	423.888	-73.118			512.436	-73.9374			366.218	-75.7838			541.361	-71.0601							466.729	-73.7277			605.033	-70.5377							515.473	-73.5484			318.458	-75.2315			382.129	-75.5904			274.756	-77.6805			398.047
	423.938	-73.1619			512.486	-73.9894			366.268	-75.8369			541.411	-71.1							466.779	-73.7784			605.083	-70.5764							515.523	-73.5982			318.508	-75.279			382.179	-75.6444			274.806	-77.7343			398.097
	423.988	-73.2058			512.536	-74.0414			366.318	-75.8901			541.461	-71.14							466.829	-73.8292			605.133	-70.6151							515.573	-73.648			318.558	-75.3265			382.229	-75.6983			274.856	-77.7879			398.147
	424.038	-73.2497			512.586	-74.0934			366.368	-75.9432			541.511	-71.18							466.879	-73.88			605.183	-70.6538							515.623	-73.6978			318.608	-75.374			382.279	-75.7523			274.906	-77.8414			398.197
	424.088	-73.2937			512.636	-74.1455			366.418	-75.9964			541.561	-71.22							466.929	-73.9308			605.233	-70.6927							515.673	-73.7477			318.658	-75.4215			382.329	-75.8062			274.956	-77.8949			398.247
	424.138	-73.3376			512.686	-74.1976			366.468	-76.0494			541.611	-71.2601							466.979	-73.9816			605.283	-70.7315							515.723	-73.7977			318.708	-75.4689			382.379	-75.86			275.006	-77.9482			398.297
	424.188	-73.3817			512.736	-74.2497			366.518	-76.1025			541.661	-71.3003							467.029	-74.0325			605.333	-70.7704							515.773	-73.8476			318.758	-75.5164			382.429	-75.9139			275.056	-78.0015			398.347
	424.238	-73.4257			512.786	-74.3018			366.568	-76.1555			541.711	-71.3405							467.079	-74.0833			605.383	-70.8094							515.823	-73.8976			318.808	-75.5638			382.479	-75.9677			275.106	-78.0546			398.397
	424.288	-73.4697			512.836	-74.3539			366.618	-76.2086			541.761	-71.3807							467.129	-74.1343			605.433	-70.8484							515.873	-73.9476			318.858	-75.6112			382.529	-76.0214			275.156	-78.1077			398.447
	424.338	-73.5138			512.886	-74.4061			366.668	-76.2615			541.811	-71.421							467.179	-74.1852			605.483	-70.8875							515.923	-73.9977			318.908	-75.6585			382.579	-76.0752			275.206	-78.1606			398.497
	424.388	-73.5579			512.936	-74.4583			366.718	-76.3145			541.861	-71.4613							467.229	-74.2362			605.533	-70.9266							515.973	-74.0478			318.958	-75.7059			382.629	-76.1289			275.256	-78.2135			398.547
	424.438	-73.602			512.986	-74.5105			366.768	-76.3674			541.911	-71.5016							467.279	-74.2872			605.583	-70.9657							516.023	-74.0979			319.008	-75.7532			382.679	-76.1826			275.306	-78.2662			398.597
	424.488	-73.6461			513.036	-74.5628			366.818	-76.4203			541.961	-71.542							467.329	-74.3382			605.633	-71.0049							516.073	-74.1481			319.058	-75.8005			382.729	-76.2362			275.356	-78.3188			398.647
	424.538	-73.6903			513.086	-74.615			366.868	-76.4732			542.011	-71.5824							467.379	-74.3892			605.683	-71.0441							516.123	-74.1982			319.108	-75.8478			382.779	-76.2898			275.406	-78.3713			398.697
	424.588	-73.7344			513.136	-74.6673			366.918	-76.526			542.061	-71.6229							467.429	-74.4403			605.733	-71.0834							516.173	-74.2485			319.158	-75.895			382.829	-76.3434			275.456	-78.4237			398.747
	424.638	-73.7786			513.186	-74.7195			366.968	-76.5788			542.111	-71.6634							467.479	-74.4914			605.783	-71.1227							516.223	-74.2987			319.208	-75.9422			382.879	-76.3969			275.506	-78.476			398.797
	424.688	-73.8228			513.236	-74.7718			367.018	-76.6315			542.161	-71.704							467.529	-74.5425			605.833	-71.1621							516.273	-74.349			319.258	-75.9894			382.929	-76.4504			275.556	-78.5281			398.847
	424.738	-73.867			513.286	-74.8241			367.068	-76.6842			542.211	-71.7446							467.579	-74.5936			605.883	-71.2015							516.323	-74.3993			319.308	-76.0366			382.979	-76.5038			275.606	-78.5802			398.897
	424.788	-73.9113			513.336	-74.8765			367.118	-76.7369			542.261	-71.7852							467.629	-74.6447			605.933	-71.241							516.373	-74.4496			319.358	-76.0837			383.029	-76.5572			275.656	-78.6321			398.947
	424.838	-73.9555			513.386	-74.9288			367.168	-76.7895			542.311	-71.8259							467.679	-74.6959			605.983	-71.2805							516.423	-74.4999			319.408	-76.1308			383.079	-76.6106			275.706	-78.6839			398.997
	424.888	-73.9998			513.436	-74.9811			367.218	-76.8421			542.361	-71.8666							467.729	-74.747			606.033	-71.32							516.473	-74.5503			319.458	-76.1779			383.129	-76.6639			275.756	-78.7356			399.047
	424.938	-74.0441			513.486	-75.0335			367.268	-76.8946			542.411	-71.9074							467.779	-74.7982			606.083	-71.3596							516.523	-74.6007			319.508	-76.2249			383.179	-76.7171			275.806	-78.7871			399.097
	424.988	-74.0884			513.536	-75.0858			367.318	-76.9471			542.461	-71.9482							467.829	-74.8494			606.133	-71.3993							516.573	-74.6511			319.558	-76.2719			383.229	-76.7703			275.856	-78.8386			399.147
	425.038	-74.1327			513.586	-75.1382			367.368	-76.9995			542.511	-71.9891							467.879	-74.9007			606.183	-71.4389							516.623	-74.7015			319.608	-76.3189			383.279	-76.8235			275.906	-78.8899			399.197
	425.088	-74.177			513.636	-75.1905			367.418	-77.0519			542.561	-72.0299							467.929	-74.9519			606.233	-71.4787							516.673	-74.752			319.658	-76.3658			383.329	-76.8766			275.956	-78.9411			399.247
	425.138	-74.2213			513.686	-75.2429			367.468	-77.1043			542.611	-72.0709							467.979	-75.0031			606.283	-71.5184							516.723	-74.8025			319.708	-76.4127			383.379	-76.9296			276.006	-78.9921			399.297
	425.188	-74.2657			513.736	-75.2953			367.518	-77.1566			542.661	-72.1118							468.029	-75.0544			606.333	-71.5583							516.773	-74.853			319.758	-76.4596			383.429	-76.9826			276.056	-79.0431			399.347
	425.238	-74.31			513.786	-75.3476			367.568	-77.2088			542.711	-72.1528							468.079	-75.1057			606.383	-71.5981							516.823	-74.9035			319.808	-76.5064			383.479	-77.0355			283.919	-84.9898			399.397
	425.288	-74.3544			513.836	-75.4			367.618	-77.261			542.761	-72.1939							468.129	-75.1569			606.433	-71.638							516.873	-74.954			319.858	-76.5532			383.529	-77.0884			292.851	-86.9119			399.447
	425.338	-74.3988			513.886	-75.4524			367.668	-77.3131			542.811	-72.2349							468.179	-75.2082			606.483	-71.678							516.923	-75.0046			319.908	-76.5999			383.579	-77.1412			302.851	-87.2245			399.497
	425.388	-74.4432			513.936	-75.5047			367.718	-77.3652			542.861	-72.276							468.229	-75.2595			606.533	-71.7179							516.973	-75.0551			319.958	-76.6466			383.629	-77.1939			312.851	-87.2875			399.547
	425.438	-74.4876			513.986	-75.5571			367.768	-77.4172			542.911	-72.3172							468.279	-75.3108			606.583	-71.758							517.023	-75.1057			320.008	-76.6933			383.679	-77.2466			322.851	-87.325			399.597
	425.488	-74.532			514.036	-75.6095			367.818	-77.4692			542.961	-72.3584							468.329	-75.3621			606.633	-71.7981							517.073	-75.1563			320.058	-76.7399			383.729	-77.2992			332.851	-87.358			399.647
	425.538	-74.5765			514.086	-75.6618			367.868	-77.5211			543.011	-72.3996							468.379	-75.4134			606.683	-71.8382							517.123	-75.2069			320.108	-76.7865			383.779	-77.3518			342.851	-87.3885			399.697
	425.588	-74.6209			514.136	-75.7142			367.918	-77.5729			543.061	-72.4409							468.429	-75.4647			606.733	-71.8783							517.173	-75.2575			320.158	-76.8331			383.829	-77.4042			352.851	-87.4168			399.747
	425.638	-74.6653			514.186	-75.7665			367.968	-77.6247			543.111	-72.4822							468.479	-75.5161			606.783	-71.9185							517.223	-75.3081			320.208	-76.8796			383.879	-77.4567			362.851	-87.4433			399.797
	425.688	-74.7098			514.236	-75.8188			368.018	-77.6764			543.161	-72.5235							468.529	-75.5674			606.833	-71.9588							517.273	-75.3588			320.258	-76.926			383.929	-77.509			372.851	-87.4679			399.847
	425.738	-74.7542			514.286	-75.8711			368.068	-77.728			543.211	-72.5649							468.579	-75.6187			606.883	-71.999							517.323	-75.4094			320.308	-76.9724			383.979	-77.5612			382.851	-87.4909			399.897
	425.788	-74.7987			514.336	-75.9234			368.118	-77.7796			543.261	-72.6063							468.629	-75.67			606.933	-72.0394							517.373	-75.46			320.358	-77.0188			384.029	-77.6134			392.851	-87.5123			399.947
	425.838	-74.8432			514.386	-75.9757			368.168	-77.8311			543.311	-72.6477							468.679	-75.7213			606.983	-72.0797							517.423	-75.5107			320.408	-77.0651			384.079	-77.6655			402.851	-87.5322			399.997
	425.888	-74.8876			514.436	-76.028			368.218	-77.8826			543.361	-72.6892							468.729	-75.7726			607.033	-72.1201							517.473	-75.5614			320.458	-77.1114			384.129	-77.7176			412.851	-87.5509			400.047
	425.938	-74.9321			514.486	-76.0803			368.268	-77.9339			543.411	-72.7307							468.779	-75.8239			607.083	-72.1606							517.523	-75.612			320.508	-77.1576			384.179	-77.7695			422.851	-87.5682			400.097
	425.988	-74.9766			514.536	-76.1325			368.318	-77.9852			543.461	-72.7723							468.829	-75.8752			607.133	-72.2011							517.573	-75.6627			320.558	-77.2038			384.229	-77.8214			432.851	-87.5844			400.147
	426.038	-75.0211			514.586	-76.1848			368.368	-78.0364			543.511	-72.8138							468.879	-75.9265			607.183	-72.2416							517.623	-75.7134			320.608	-77.2499			384.279	-77.8732			442.851	-87.5996			400.197
	426.088	-75.0656			514.636	-76.237			368.418	-78.0875			543.561	-72.8555							468.929	-75.9778			607.233	-72.2822							517.673	-75.764			320.658	-77.296			384.329	-77.9249			452.851	-87.6137			400.247
	426.138	-75.1101			514.686	-76.2892			368.468	-78.1386			543.611	-72.8971							468.979	-76.0291			607.283	-72.3228							517.723	-75.8147			320.708	-77.342			384.379	-77.9765			462.851	-87.6269			400.297
	426.188	-75.1546			514.736	-76.3413			368.518	-78.1896			543.661	-72.9388							469.029	-76.0803			607.333	-72.3634							517.773	-75.8654			320.758	-77.388			384.429	-78.0281			472.851	-87.6393			400.347
	426.238	-75.1991			514.786	-76.3935			368.568	-78.2405			543.711	-72.9805							469.079	-76.1316			607.383	-72.4041							517.823	-75.9161			320.808	-77.4339			384.479	-78.0795			482.851	-87.6508			400.397
	426.288	-75.2436			514.836	-76.4456			368.618	-78.2913			543.761	-73.0223							469.129	-76.1828			607.433	-72.4448							517.873	-75.9667			320.858	-77.4797			384.529	-78.1309			492.851	-87.6616			400.447
	426.338	-75.2881			514.886	-76.4977			368.668	-78.342			543.811	-73.064							469.179	-76.2341			607.483	-72.4856							517.923	-76.0174			320.908	-77.5255			384.579	-78.1821			502.851	-87.6716			400.497
	426.388	-75.3326			514.936	-76.5497			368.718	-78.3927			543.861	-73.1059							469.229	-76.2853			607.533	-72.5264							517.973	-76.068			320.958	-77.5713			384.629	-78.2333			512.851	-87.6811			400.547
	426.438	-75.3771			514.986	-76.6018			368.768	-78.4432			543.911	-73.1477							469.279	-76.3365			607.583	-72.5672							518.023	-76.1187			321.008	-77.617			384.679	-78.2844			522.851	-87.6899			400.597
	426.488	-75.4215			515.036	-76.6538			368.818	-78.4937			543.961	-73.1896							469.329	-76.3877			607.633	-72.6081							518.073	-76.1693			321.058	-77.6626			384.729	-78.3353			532.851	-87.6982			400.647
	426.538	-75.466			515.086	-76.7057			368.868	-78.5441			544.011	-73.2315							469.379	-76.4388			607.683	-72.649							518.123	-76.22			321.108	-77.7082			384.779	-78.3862			542.851	-87.706			400.697
	426.588	-75.5105			515.136	-76.7577			368.918	-78.5944			544.061	-73.2734							469.429	-76.49			607.733	-72.69							518.173	-76.2706			321.158	-77.7537			384.829	-78.437			552.851	-87.7133			400.747
	426.638	-75.555			515.186	-76.8096			368.968	-78.6446			544.111	-73.3154							469.479	-76.5411			607.783	-72.731							518.223	-76.3212			321.208	-77.7991			384.879	-78.4877			562.851	-87.7201			400.797
	426.688	-75.5995			515.236	-76.8614			369.018	-78.6947			544.161	-73.3574							469.529	-76.5922			607.833	-72.772							518.273	-76.3718			321.258	-77.8445			384.929	-78.5382			572.851	-87.7265			400.847
	426.738	-75.6439			515.286	-76.9132			369.068	-78.7447			544.211	-73.3994							469.579	-76.6433			607.883	-72.813							518.323	-76.4224			321.308	-77.8899			384.979	-78.5887			582.851	-87.7325			400.897
	426.788	-75.6884			515.336	-76.965			369.118	-78.7946			544.261	-73.4415							469.629	-76.6943			607.933	-72.8541							518.373	-76.473			321.358	-77.9351			385.029	-78.6391			592.851	-87.7382			400.947
	426.838	-75.7329			515.386	-77.0168			369.168	-78.8444			544.311	-73.4836							469.679	-76.7454			607.983	-72.8953							518.423	-76.5235			321.408	-77.9803			385.079	-78.6893			602.851	-87.7435			400.997
	426.888	-75.7773			515.436	-77.0685			369.218	-78.8942			544.361	-73.5257							469.729	-76.7964			608.033	-72.9364							518.473	-76.5741			321.458	-78.0254			385.129	-78.7395			612.851	-87.7485			401.047
	426.938	-75.8218			515.486	-77.1201			369.268	-78.9438			544.411	-73.5678							469.779	-76.8473			608.083	-72.9777							518.523	-76.6246			321.508	-78.0705			385.179	-78.7895			622.851	-87.7532			401.097
	426.988	-75.8662			515.536	-77.1717			369.318	-78.9933			544.461	-73.61							469.829	-76.8983			608.133	-73.0189							518.573	-76.6751			321.558	-78.1155			392.387	-84.4214			632.851	-87.7576			401.147
	427.038	-75.9106			515.586	-77.2233			373.391	-82.6491			544.511	-73.6522							469.879	-76.9492			608.183	-73.0602							518.623	-76.7256			321.608	-78.1604			401.19	-86.5913			642.851	-87.7618			401.197
	427.088	-75.955			515.636	-77.2748			381.485	-86.4023			544.561	-73.6944							469.929	-77.0001			608.233	-73.1015							518.673	-76.7761			321.658	-78.2053			411.19	-86.9427			652.851	-87.7657			401.247
	427.138	-75.9994			515.686	-77.3263			391.485	-87.3212			544.611	-73.7367							469.979	-77.0509			608.283	-73.1428							518.723	-76.8265			321.708	-78.2501			421.19	-87.0049			662.851	-87.7695			401.297
	427.188	-76.0438			515.736	-77.3777			401.485	-87.4373			544.661	-73.779							470.029	-77.1018			608.333	-73.1842							518.773	-76.8769			321.758	-78.2948			431.19	-87.04			672.851	-87.773			401.347
	427.238	-76.0882			515.786	-77.4291			411.485	-87.4702			544.711	-73.8213							470.079	-77.1525			608.383	-73.2256							518.823	-76.9273			321.808	-78.3395			441.19	-87.0707			682.851	-87.7762			401.397
	427.288	-76.1326			515.836	-77.4804			421.485	-87.4933			544.761	-73.8636							470.129	-77.2033			608.433	-73.2671							518.873	-76.9777			321.858	-78.384			451.19	-87.0993			692.851	-87.7794			401.447
	427.338	-76.1769			515.886	-77.5317			431.485	-87.5138			544.811	-73.906							470.179	-77.254			608.483	-73.3085							518.923	-77.028			321.908	-78.4286			461.19	-87.1261			702.851	-87.7823			401.497
	427.388	-76.2213			515.936	-77.5829			441.485	-87.5325			544.861	-73.9483							470.229	-77.3047			608.533	-73.35							518.973	-77.0783			321.958	-78.473			471.19	-87.1511			712.851	-87.7851			401.547
	427.438	-76.2656			515.986	-77.634			451.485	-87.5498			544.911	-73.9907							470.279	-77.3553			608.583	-73.3916							519.023	-77.1286			322.008	-78.5173			481.19	-87.1747			722.851	-87.7877			401.597
	427.488	-76.3099			516.036	-77.6851			461.485	-87.5658			544.961	-74.0332							470.329	-77.4059			608.633	-73.4332							519.073	-77.1788			322.058	-78.5616			491.19	-87.1968			732.851	-87.7902			401.647
	427.538	-76.3542			516.086	-77.7361			471.485	-87.5806			545.011	-74.0756							470.379	-77.4564			608.683	-73.4748							519.123	-77.229			322.108	-78.6058			501.19	-87.2176			742.851	-87.7925			401.697
	427.588	-76.3985			516.136	-77.787			481.485	-87.5944			545.061	-74.1181							470.429	-77.5069			608.733	-73.5164							519.173	-77.2792			322.158	-78.6499			511.19	-87.2371			752.851	-87.7947			401.747
	427.638	-76.4427			516.186	-77.8379			491.485	-87.6073			545.111	-74.1606							470.479	-77.5574			608.783	-73.5581							519.223	-77.3294			322.208	-78.694			521.189	-87.2555			762.851	-87.7968			401.797
	427.688	-76.487			516.236	-77.8888			501.485	-87.6193			545.161	-74.2031							470.529	-77.6078			608.833	-73.5998							519.273	-77.3795			322.258	-78.738			531.189	-87.2728			772.851	-87.7988			401.847
	427.738	-76.5312			516.286	-77.9395			511.485	-87.6304			545.211	-74.2457							470.579	-77.6581			608.883	-73.6415							519.323	-77.4295			322.308	-78.7818			541.189	-87.289			782.851	-87.8007			401.897
	427.788	-76.5754			516.336	-77.9902			521.485	-87.6409			545.261	-74.2882							470.629	-77.7084			608.933	-73.6832							519.373	-77.4796			322.358	-78.8256			551.189	-87.3044			792.851	-87.8025			401.947
	427.838	-76.6196			516.386	-78.0408			531.485	-87.6506			545.311	-74.3308							470.679	-77.7587			608.983	-73.725							519.423	-77.5295			322.408	-78.8694			561.189	-87.3188			802.851	-87.8042			401.997
	427.888	-76.6637			516.436	-78.0914			541.485	-87.6597			545.361	-74.3734							470.729	-77.8089			609.033	-73.7668							519.473	-77.5795			322.458	-78.913			571.189	-87.3324			812.851	-87.8058			402.047
	427.938	-76.7079			516.486	-78.1418			551.485	-87.6683			545.411	-74.416							470.779	-77.859			609.083	-73.8087							519.523	-77.6294			322.508	-78.9566			581.189	-87.3453			822.851	-87.8073			402.097
	427.988	-76.752			516.536	-78.1922			561.485	-87.6763			545.461	-74.4587							470.829	-77.9091			609.133	-73.8505							519.573	-77.6792			322.558	-79			591.189	-87.3574			832.851	-87.8087			402.147
	428.038	-76.7961			516.586	-78.2425			571.485	-87.6838			545.511	-74.5013							470.879	-77.9591			609.183	-73.8924							519.623	-77.729			322.608	-79.0434			601.189	-87.3688			842.851	-87.81			402.197
	428.088	-76.8401			516.636	-78.2928			581.485	-87.6908			545.561	-74.544							470.929	-78.0091			609.233	-73.9344							519.673	-77.7788			322.658	-79.0867			611.189	-87.3795			852.851	-87.8113			402.247
	428.138	-76.8842			516.686	-78.3429			591.485	-87.6974			545.611	-74.5867							470.979	-78.059			609.283	-73.9763							519.723	-77.8285			322.708	-79.1299			621.189	-87.3897			862.851	-87.8125			402.297
	428.188	-76.9282			516.736	-78.393			601.485	-87.7035			545.661	-74.6294							471.029	-78.1088			609.333	-74.0183							519.773	-77.8782			327.371	-82.7562			631.189	-87.3993			872.851	-87.8137			402.347
	428.238	-76.9722			516.786	-78.443			611.485	-87.7093			545.711	-74.6722							471.079	-78.1586			609.383	-74.0603							519.823	-77.9278			336.646	-86.4504			641.189	-87.4084			882.851	-87.8148			402.397
	428.288	-77.0161			516.836	-78.4929			621.485	-87.7148			545.761	-74.7149							471.129	-78.2084			609.433	-74.1023							519.873	-77.9773			346.646	-87.3358			651.189	-87.4169			892.851	-87.8158			402.447
	428.338	-77.06			516.886	-78.5427			631.485	-87.7199			545.811	-74.7577							471.179	-78.258			609.483	-74.1444							519.923	-78.0268			356.646	-87.4875			661.189	-87.425			902.851	-87.8168			402.497
	428.388	-77.1039			516.936	-78.5925			641.485	-87.7247			545.861	-74.8004							471.229	-78.3076			609.533	-74.1865							519.973	-78.0763			366.646	-87.5291			671.189	-87.4327			912.851	-87.8177			402.547
	428.438	-77.1478			516.986	-78.6421			651.485	-87.7292			545.911	-74.8432							471.279	-78.3571			609.583	-74.2286							520.023	-78.1257			376.646	-87.5541			681.189	-87.4399			922.851	-87.8186			402.597
	428.488	-77.1916			517.036	-78.6916			661.485	-87.7335			545.961	-74.886							471.329	-78.4066			609.633	-74.2707							520.073	-78.175			386.646	-87.5756			691.189	-87.4467			932.851	-87.8195			402.647
	428.538	-77.2354			517.086	-78.7411			671.485	-87.7375			546.011	-74.9289							471.379	-78.456			609.683	-74.3128							520.123	-78.2243			396.646	-87.5956			701.189	-87.4532			942.851	-87.8203			402.697
	428.588	-77.2792			517.136	-78.7905			681.485	-87.7412			546.061	-74.9717							471.429	-78.5053			609.733	-74.355							520.173	-78.2735			406.646	-87.6144			711.189	-87.4593			952.851	-87.821			402.747
	428.638	-77.323			525.246	-84.8839			691.485	-87.7448			546.111	-75.0145							471.479	-78.5545			609.783	-74.3972							520.223	-78.3226			416.646	-87.6321			721.189	-87.4652			962.851	-87.8217			402.797
	428.688	-77.3667			534.302	-86.8126			701.485	-87.7481			546.161	-75.0574							471.529	-78.6037			609.833	-74.4394							520.273	-78.3717			426.646	-87.6489			731.189	-87.4706			972.851	-87.8224			402.847
	428.738	-77.4103			544.302	-87.101			711.485	-87.7513			546.211	-75.1003							471.579	-78.6527			609.883	-74.4816							520.323	-78.4207			436.646	-87.6647			741.189	-87.4759			982.851	-87.823			402.897
	428.788	-77.454			554.302	-87.1535			721.485	-87.7542			546.261	-75.1431							471.629	-78.7017			609.933	-74.5239							520.373	-78.4697			446.646	-87.6797			751.189	-87.4808			992.851	-87.8236			402.947
	428.838	-77.4976			564.302	-87.1829			731.485	-87.757			546.311	-75.186							471.679	-78.7507			609.983	-74.5662							520.423	-78.5186			456.646	-87.6939			761.189	-87.4855			998.871	-87.824			402.997
	428.888	-77.5411			574.302	-87.2081			741.485	-87.7597			546.361	-75.2289							471.729	-78.7995			610.033	-74.6085							520.473	-78.5674			466.646	-87.7073			771.189	-87.4899			998.921	-87.824			403.047
	428.938	-77.5846			584.302	-87.2309			751.485	-87.7622			546.411	-75.2718							471.779	-78.8483			610.083	-74.6508							520.523	-78.6161			476.646	-87.72			781.189	-87.4941			998.971	-87.824			403.097
	428.988	-77.6281			594.302	-87.2519			761.485	-87.7645			546.461	-75.3148							471.829	-78.8969			610.133	-74.6931							520.573	-78.6648			486.646	-87.7321			791.189	-87.4981			999.021	-87.824			403.147
	429.038	-77.6716			604.302	-87.2713			771.485	-87.7668			546.511	-75.3577							471.879	-78.9455			610.183	-74.7355							520.623	-78.7134			496.646	-87.7434			801.189	-87.5019			999.071	-87.824			403.197
	429.088	-77.715			614.302	-87.2894			781.485	-87.7689			546.561	-75.4006							471.929	-78.994			610.233	-74.7779							520.673	-78.7619			506.646	-87.7542			811.189	-87.5054			999.121	-87.824			403.247
	429.138	-77.7583			624.302	-87.3061			791.485	-87.7708			546.611	-75.4435							477.724	-83.8226			610.283	-74.8202							520.723	-78.8103			516.646	-87.7644			821.189	-87.5088			999.171	-87.824			403.297
	429.188	-77.8016			634.302	-87.3218			801.485	-87.7727			546.661	-75.4865							486.331	-86.8687			610.333	-74.8627							520.773	-78.8587			526.646	-87.7741			831.189	-87.5121			999.221	-87.824			403.347
	429.238	-77.8449			644.302	-87.3364			811.485	-87.7745			546.711	-75.5294							496.331	-87.4719			610.383	-74.9051							520.823	-78.907			536.646	-87.7832			841.189	-87.5151			999.271	-87.824			403.397
	429.288	-77.8881			654.302	-87.3501			821.485	-87.7762			546.761	-75.5724							506.331	-87.55			610.433	-74.9475							520.873	-78.9552			546.646	-87.7919			851.189	-87.518			999.321	-87.824			403.447
	429.338	-77.9313			664.302	-87.3629			831.485	-87.7777			546.811	-75.6154							516.331	-87.5734			610.483	-74.99							520.923	-79.0033			556.646	-87.8001			861.189	-87.5208			999.371	-87.824			403.497
	429.388	-77.9744			674.302	-87.3749			841.485	-87.7792			546.861	-75.6583							526.331	-87.5897			610.533	-75.0324							527.59	-84.3423			566.646	-87.8079			871.189	-87.5234			999.421	-87.824			403.547
	429.438	-78.0175			684.302	-87.3861			851.485	-87.7807			546.911	-75.7013							536.331	-87.6039			610.583	-75.0749							536.416	-87.03			576.646	-87.8153			881.189	-87.5259			999.471	-87.824			403.597
	429.488	-78.0606			694.302	-87.3967			861.485	-87.782			546.961	-75.7443							546.331	-87.6167			610.633	-75.1174							546.416	-87.5156			586.646	-87.8224			891.189	-87.5283			999.521	-87.824			403.647
	429.538	-78.1036			704.302	-87.4067			871.485	-87.7833			547.011	-75.7872							556.331	-87.6284			610.683	-75.1599							556.416	-87.5806			596.646	-87.829			901.189	-87.5305							403.697
	429.588	-78.1465			714.302	-87.416			881.485	-87.7844			547.061	-75.8302							566.331	-87.6391			610.733	-75.2025							566.416	-87.6016			606.646	-87.8354			911.189	-87.5327							403.747
	429.638	-78.1894			724.302	-87.4248			891.485	-87.7856			547.111	-75.8732							576.331	-87.6489			610.783	-75.245							576.416	-87.6166			616.646	-87.8414			921.189	-87.5347							403.797
	429.688	-78.2322			734.302	-87.4331			901.485	-87.7866			547.161	-75.9162							586.331	-87.6581			610.833	-75.2875							586.416	-87.6296			626.646	-87.8471			931.189	-87.5366							403.847
	429.738	-78.275			744.302	-87.4408			911.485	-87.7876			547.211	-75.9591							596.331	-87.6665			610.883	-75.3301							596.416	-87.6413			636.646	-87.8525			941.189	-87.5384							403.897
	429.788	-78.3178			754.302	-87.4482			921.485	-87.7886			547.261	-76.0021							606.331	-87.6744			610.933	-75.3727							606.416	-87.652			646.646	-87.8577			951.189	-87.5402							403.947
	429.838	-78.3605			764.302	-87.4551			931.485	-87.7895			547.311	-76.0451							616.331	-87.6818			610.983	-75.4152							616.416	-87.6617			656.646	-87.8626			961.189	-87.5418							403.997
	429.888	-78.4031			774.302	-87.4616			941.485	-87.7904			547.361	-76.088							626.331	-87.6887			611.033	-75.4578							626.416	-87.6706			666.646	-87.8673			971.189	-87.5434							404.047
	429.938	-78.4457			784.302	-87.4677			951.485	-87.7912			547.411	-76.131							636.331	-87.6951			611.083	-75.5004							636.416	-87.6789			676.646	-87.8717			981.189	-87.5448							404.097
	429.988	-78.4882			794.302	-87.4735			961.485	-87.7919			547.461	-76.174							646.331	-87.7011			611.133	-75.543							646.416	-87.6865			686.646	-87.876			991.189	-87.5462							404.147
	430.038	-78.5306			804.302	-87.4789			971.485	-87.7926			547.511	-76.2169							656.331	-87.7067			611.183	-75.5856							656.416	-87.6936			696.646	-87.88			998.205	-87.5472							404.197
	430.088	-78.573			814.302	-87.4841			981.485	-87.7933			547.561	-76.2599							666.331	-87.7119			611.233	-75.6283							666.416	-87.7003			706.646	-87.8839			998.255	-87.5472							404.247
	430.138	-78.6154			824.302	-87.4889			991.485	-87.7939			547.611	-76.3028							676.331	-87.7169			611.283	-75.6709							676.416	-87.7064			716.646	-87.8875			998.304	-87.5472							404.297
	430.188	-78.6577			834.302	-87.4935			998.5	-87.7944			547.661	-76.3457							686.331	-87.7215			611.333	-75.7135							686.416	-87.7122			726.646	-87.891			998.355	-87.5472							404.347
	430.238	-78.6999			844.302	-87.4978			998.55	-87.7944			547.711	-76.3887							696.331	-87.7259			611.383	-75.7561							696.416	-87.7176			736.646	-87.8943			998.404	-87.5472							404.397
	430.288	-78.7421			854.302	-87.5019			998.6	-87.7944			547.761	-76.4316							706.331	-87.7299			611.433	-75.7988							706.416	-87.7226			746.646	-87.8975			998.455	-87.5472							404.447
	430.338	-78.7842			864.302	-87.5058			998.65	-87.7944			547.811	-76.4745							716.331	-87.7338			611.483	-75.8414							716.416	-87.7273			756.646	-87.9005			998.505	-87.5472							404.497
	430.388	-78.8262			874.302	-87.5094			998.7	-87.7944			547.861	-76.5174							726.331	-87.7374			611.533	-75.8841							726.416	-87.7317			766.646	-87.9034			998.554	-87.5472							404.547
	430.438	-78.8682			884.302	-87.5129			998.75	-87.7944			547.911	-76.5603							736.331	-87.7408			611.583	-75.9267							736.416	-87.7359			776.646	-87.9062			998.605	-87.5472							404.597
	430.488	-78.9101			894.302	-87.5161			998.8	-87.7944			547.961	-76.6032							746.331	-87.7439			611.633	-75.9694							746.416	-87.7397			786.646	-87.9088			998.654	-87.5472							404.647
	430.538	-78.9519			904.302	-87.5192			998.85	-87.7944			548.011	-76.6461							756.331	-87.7469			611.683	-76.012							756.416	-87.7434			796.646	-87.9113			998.705	-87.5473							404.697
	430.588	-78.9937			914.302	-87.5221			998.9	-87.7944			548.061	-76.6889							766.331	-87.7498			611.733	-76.0547							766.416	-87.7468			806.646	-87.9137			998.755	-87.5473							404.747
	430.638	-79.0354			924.302	-87.5249			998.95	-87.7944			548.111	-76.7318							776.331	-87.7524			611.783	-76.0973							776.416	-87.75			816.646	-87.916			998.804	-87.5473							404.797
	430.688	-79.0771			934.302	-87.5275			999	-87.7944			548.161	-76.7746							786.331	-87.7549			611.833	-76.14							786.416	-87.753			826.646	-87.9182			998.855	-87.5473							410.616
	430.738	-79.1186			944.302	-87.5299			999.05	-87.7944			548.211	-76.8174							796.331	-87.7573			611.883	-76.1826							796.416	-87.7558			836.646	-87.9203			998.904	-87.5473							420.315
	434.623	-82.1385			954.302	-87.5322			999.1	-87.7944			548.261	-76.8602							806.331	-87.7595			611.933	-76.2253							806.416	-87.7585			846.646	-87.9223			998.955	-87.5473							430.315
	444.262	-86.3906			964.302	-87.5344			999.15	-87.7944			548.311	-76.903							816.331	-87.7616			611.983	-76.2679							816.416	-87.761			856.646	-87.9242			999.005	-87.5473							440.315
	454.226	-87.4272			974.302	-87.5365			999.2	-87.7944			548.361	-76.9458							826.331	-87.7635			612.033	-76.3106							826.416	-87.7633			866.646	-87.926			999.054	-87.5473							450.315
	464.226	-87.6054			984.302	-87.5385			999.25	-87.7944			548.411	-76.9885							836.331	-87.7654			612.083	-76.3532							836.416	-87.7656			876.646	-87.9278			999.105	-87.5473							460.315
	474.226	-87.6461			994.302	-87.5403			999.3	-87.7944			548.461	-77.0312							846.331	-87.7671			612.133	-76.3958							846.416	-87.7676			886.646	-87.9294			999.154	-87.5473							470.315
	484.226	-87.6659			998.332	-87.541			999.35	-87.7944			548.511	-77.0739							856.331	-87.7688			612.183	-76.4385							856.416	-87.7696			896.646	-87.931			999.205	-87.5473							480.315
	494.226	-87.6817			998.381	-87.541			999.4	-87.7944			548.561	-77.1166							866.331	-87.7704			612.233	-76.4811							866.416	-87.7714			906.646	-87.9325			999.255	-87.5473							490.315
	504.226	-87.696			998.432	-87.5411			999.45	-87.7944			548.611	-77.1593							876.331	-87.7718			612.283	-76.5237							876.416	-87.7732			916.646	-87.934			999.304	-87.5473							500.315
	514.226	-87.7094			998.481	-87.5411			999.5	-87.7944			548.661	-77.202							886.331	-87.7732			612.333	-76.5663							886.416	-87.7748			926.646	-87.9354			999.355	-87.5473							510.315
	524.226	-87.722			998.532	-87.5411							548.711	-77.2446							896.331	-87.7745			612.383	-76.6089							896.416	-87.7763			936.646	-87.9367			999.404	-87.5473							520.315
	534.226	-87.7338			998.582	-87.5411							548.761	-77.2872							906.331	-87.7757			612.433	-76.6515							906.416	-87.7778			946.646	-87.938			999.455	-87.5474							530.315
	544.226	-87.745			998.631	-87.5411							548.811	-77.3298							916.331	-87.7769			612.483	-76.6941							916.416	-87.7791			956.646	-87.9392			999.505	-87.5474							540.315
	554.226	-87.7555			998.682	-87.5411							548.861	-77.3723							926.331	-87.778			612.533	-76.7366							926.416	-87.7804			966.646	-87.9404											550.315
	564.226	-87.7655			998.731	-87.5411							548.911	-77.4149							936.331	-87.779			612.583	-76.7792							936.416	-87.7816			976.646	-87.9415											560.315
	574.226	-87.7749			998.782	-87.5411							548.961	-77.4574							946.331	-87.78			612.633	-76.8217							946.416	-87.7828			986.646	-87.9426											570.315
	584.226	-87.7838			998.832	-87.5411							549.011	-77.4999							956.331	-87.7809			612.683	-76.8643							956.416	-87.7838			996.646	-87.9436											580.315
	594.226	-87.7923			998.881	-87.5411							549.061	-77.5423							966.331	-87.7818			612.733	-76.9068							966.416	-87.7848			998.686	-87.9438											590.315
	604.226	-87.8003			998.932	-87.5411							549.111	-77.5847							976.331	-87.7826			612.783	-76.9493							976.416	-87.7858			998.736	-87.9438											600.315
	614.226	-87.8078			998.981	-87.5411							549.161	-77.6271							986.331	-87.7833			612.833	-76.9918							986.416	-87.7867			998.786	-87.9438											610.315
	624.226	-87.815			999.032	-87.5412							549.211	-77.6695							996.331	-87.784			612.883	-77.0342							996.416	-87.7875			998.836	-87.9438											620.315
	634.226	-87.8218			999.082	-87.5412							549.261	-77.7118							998.371	-87.7842			612.933	-77.0767							998.456	-87.7877			998.886	-87.9438											630.315
	644.226	-87.8283			999.131	-87.5412							549.311	-77.7541							998.421	-87.7842			612.983	-77.1191							998.506	-87.7877			998.936	-87.9438											640.315
	654.226	-87.8344			999.182	-87.5412							549.361	-77.7964							998.471	-87.7842			613.033	-77.1616							998.556	-87.7877			998.986	-87.9438											650.315
	664.226	-87.8402			999.231	-87.5412							549.411	-77.8386							998.521	-87.7842			613.083	-77.204							998.606	-87.7877			999.036	-87.9438											660.315
	674.226	-87.8457			999.282	-87.5412							549.461	-77.8808							998.571	-87.7842			613.133	-77.2464							998.656	-87.7877			999.086	-87.9438											670.315
	684.226	-87.851			999.332	-87.5412							549.511	-77.923							998.621	-87.7842			613.183	-77.2887							998.706	-87.7877			999.136	-87.9438											680.315
	694.226	-87.856			999.381	-87.5412							549.561	-77.9651							998.671	-87.7842			613.233	-77.3311							998.756	-87.7877			999.186	-87.9438											690.315
	704.226	-87.8607			999.432	-87.5412							549.611	-78.0072							998.721	-87.7842			613.283	-77.3734							998.806	-87.7877			999.236	-87.9439											700.315
	714.226	-87.8652			999.481	-87.5412							549.661	-78.0493							998.771	-87.7842			613.333	-77.4157							998.856	-87.7877			999.286	-87.9439											710.315
	724.226	-87.8695			999.532	-87.5412							549.711	-78.0913							998.821	-87.7842			613.383	-77.458							998.906	-87.7877			999.336	-87.9439											720.315
	734.226	-87.8735											549.761	-78.1333							998.871	-87.7842			613.433	-77.5002							998.956	-87.7877			999.386	-87.9439											730.315
	744.226	-87.8774											549.811	-78.1752							998.921	-87.7842			613.483	-77.5424							999.006	-87.7877			999.436	-87.9439											740.315
	754.226	-87.8811											549.861	-78.2171							998.971	-87.7842			613.533	-77.5846							999.056	-87.7877			999.486	-87.9439											750.315
	764.226	-87.8846											549.911	-78.259							999.021	-87.7842			613.583	-77.6268							999.106	-87.7877			999.536	-87.9439											760.315
	774.226	-87.8879											549.961	-78.3008							999.071	-87.7842			613.633	-77.669							999.156	-87.7877															770.315
	784.226	-87.8911											550.011	-78.3425							999.121	-87.7842			613.683	-77.7111							999.206	-87.7877															780.315
	794.226	-87.8942											550.061	-78.3843							999.171	-87.7842			613.733	-77.7532							999.256	-87.7877															790.315
	804.226	-87.897											550.111	-78.426							999.221	-87.7842			613.783	-77.7952							999.306	-87.7877															800.315
	814.226	-87.8998											550.161	-78.4676							999.271	-87.7842			613.833	-77.8373							999.356	-87.7877															810.315
	824.226	-87.9024											550.211	-78.5092							999.321	-87.7842			613.883	-77.8793							999.406	-87.7877															820.315
	834.226	-87.9049											550.261	-78.5507							999.371	-87.7843			613.933	-77.9212							999.456	-87.7877															830.315
	844.226	-87.9073											550.311	-78.5922							999.421	-87.7843			613.983	-77.9632							999.506	-87.7878															840.315
	854.226	-87.9096											550.361	-78.6337							999.471	-87.7843			614.033	-78.0051																							850.315
	864.226	-87.9118											550.411	-78.6751							999.521	-87.7843			614.083	-78.0469																							860.315
	874.226	-87.9138											550.461	-78.7164											614.133	-78.0888																							870.315
	884.226	-87.9158											550.511	-78.7577											614.183	-78.1306																							880.315
	894.226	-87.9177											550.561	-78.7989											614.233	-78.1723																							890.315
	904.226	-87.9195											550.611	-78.8401											614.283	-78.214																							900.315
	914.226	-87.9212											550.661	-78.8813											614.333	-78.2557																							910.315
	924.226	-87.9228											550.711	-78.9223											614.383	-78.2973																							920.315
	934.226	-87.9244											550.761	-78.9634											614.433	-78.3389																							930.315
	944.226	-87.9259											550.811	-79.0043											614.483	-78.3805																							940.315
	954.226	-87.9273											550.861	-79.0452											614.533	-78.422																							950.315
	964.226	-87.9287											550.911	-79.0861											614.583	-78.4635																							960.315
	974.226	-87.93											550.961	-79.1269											614.633	-78.5049																							970.315
	984.226	-87.9312											556.872	-83.4162											614.683	-78.5463																							980.315
	994.226	-87.9324											566.709	-86.852											614.733	-78.5877																							990.315
	998.255	-87.9329											576.709	-87.5897											614.783	-78.629																							998.325
	998.306	-87.9329											586.709	-87.7143											614.833	-78.6702																							998.375
	998.356	-87.9329											596.709	-87.7432											614.883	-78.7114																							998.425
	998.405	-87.9329											606.709	-87.7574											614.933	-78.7525																							998.475
	998.456	-87.9329											616.709	-87.7687											614.983	-78.7936																							998.525
	998.505	-87.9329											626.709	-87.779											615.033	-78.8347																							998.575
	998.556	-87.9329											636.709	-87.7886											615.083	-78.8757																							998.625
	998.606	-87.9329											646.709	-87.7976											615.133	-78.9166																							998.675
	998.655	-87.9329											656.709	-87.8061											615.183	-78.9575																							998.725
	998.706	-87.933											666.709	-87.8141											615.233	-78.9984																							998.775
	998.755	-87.933											676.709	-87.8217											615.283	-79.0392																							998.825
	998.806	-87.933											686.709	-87.8289											615.333	-79.0799																							998.875
	998.856	-87.933											696.709	-87.8356											615.383	-79.1206																							998.925
	998.905	-87.933											706.709	-87.842											618.373	-81.4627																							998.975
	998.956	-87.933											716.709	-87.8481											628.223	-86.2906																							999.025
	999.005	-87.933											726.709	-87.8539											638.194	-87.5252																							999.075
	999.056	-87.933											736.709	-87.8593											648.194	-87.7352																							999.125
	999.106	-87.933											746.709	-87.8645											658.194	-87.7754																							999.175
	999.155	-87.933											756.709	-87.8694											668.194	-87.7901																							999.225
	999.206	-87.933											766.709	-87.874											678.194	-87.8005																							999.275
	999.255	-87.933											776.709	-87.8785											688.194	-87.8097																							999.325
	999.306	-87.933											786.709	-87.8827											698.194	-87.8183																							999.375
	999.356	-87.933											796.709	-87.8867											708.194	-87.8263																							999.425
	999.405	-87.933											806.709	-87.8904											718.194	-87.8339																							999.475
	999.456	-87.933											816.709	-87.894											728.194	-87.841																							999.525
	999.505	-87.933											826.709	-87.8975											738.194	-87.8478
													836.709	-87.9007											748.194	-87.8542
													846.709	-87.9038											758.194	-87.8602
													856.709	-87.9068											768.194	-87.8659
													866.709	-87.9096											778.194	-87.8714
													876.709	-87.9122											788.194	-87.8765
													886.709	-87.9148											798.194	-87.8814
													896.709	-87.9172											808.194	-87.886
													906.709	-87.9195											818.194	-87.8903
													916.709	-87.9217											828.194	-87.8945
													926.709	-87.9238											838.194	-87.8984
													936.709	-87.9258											848.194	-87.9022
													946.709	-87.9277											858.194	-87.9057
													956.709	-87.9295											868.194	-87.9091
													966.709	-87.9312											878.194	-87.9123
													976.709	-87.9329											888.194	-87.9154
													986.709	-87.9344											898.194	-87.9183
													996.709	-87.9359											908.194	-87.921
													998.749	-87.9362											918.194	-87.9237
													998.799	-87.9362											928.194	-87.9261
													998.849	-87.9362											938.194	-87.9285
													998.899	-87.9362											948.194	-87.9308
													998.949	-87.9363											958.194	-87.9329
													998.999	-87.9363											968.194	-87.935
													999.049	-87.9363											978.194	-87.9369
													999.099	-87.9363											988.194	-87.9388
													999.149	-87.9363											998.194	-87.9406
													999.199	-87.9363											998.244	-87.9406
													999.249	-87.9363											998.294	-87.9406
													999.299	-87.9363											998.344	-87.9406
													999.349	-87.9363											998.394	-87.9406
													999.399	-87.9363											998.444	-87.9406
													999.449	-87.9363											998.494	-87.9406
													999.499	-87.9363											998.544	-87.9406
													999.549	-87.9363											998.594	-87.9406
																									998.644	-87.9406
																									998.694	-87.9406
																									998.744	-87.9406
																									998.794	-87.9407
																									998.844	-87.9407
																									998.894	-87.9407
																									998.944	-87.9407
																									998.994	-87.9407
																									999.044	-87.9407
																									999.094	-87.9407
																									999.144	-87.9407
																									999.194	-87.9407
																									999.244	-87.9407
																									999.294	-87.9407
																									999.344	-87.9408
																									999.394	-87.9408
																									999.444	-87.9408
																									999.494	-87.9408
																									999.544	-87.9408
[truncated: 43 more columns]

## Sheet: 3D Model
No Drug			1xCmax												5xCmax												10xCmax
Time (ms)	Amplitude			Time (ms)	Amplitude			Time (ms)	Amplitude			Time (ms)	Amplitude			Time (ms)	Amplitude			Time (ms)	Amplitude			Time (ms)	Amplitude			Time (ms)	Amplitude			Time (ms)	Amplitude			Time (ms)	Amplitude
0.95	5.9e-06		Dofetilide	0.95	5.9e-06		Ranolazine	0.95	5.9e-06		Verapamil	0.95	5.9e-06		Dofetilide	0.95	5.9e-06		Ranolazine	0.95	5.9e-06		Verapamil	0.95	5.9e-06		Dofetilide	0.95	5.9e-06		Ranolazine	0.95	5.9e-06		Verapamil	0.95	5.9e-06
1.95	5.9e-06			1.95	5.9e-06			1.95	5.9e-06			1.95	5.9e-06			1.95	5.9e-06			1.95	5.9e-06			1.95	5.9e-06			1.95	5.9e-06			1.95	5.8e-06			1.95	5.9e-06
2.95	5.8e-06			2.95	5.8e-06			2.95	5.8e-06			2.95	5.8e-06			2.95	5.8e-06			2.95	5.8e-06			2.95	5.8e-06			2.95	5.8e-06			2.95	5.8e-06			2.95	5.8e-06
3.95	-5.4e-06			3.95	-5.4e-06			3.95	-5.4e-06			3.95	-5.4e-06			3.95	-5.4e-06			3.95	-5.4e-06			3.95	-5.4e-06			3.95	-5.4e-06			3.95	-5.3e-06			3.95	-5.4e-06
4.95	-2.17e-05			4.95	-2.17e-05			4.95	-2.17e-05			4.95	-2.16e-05			4.95	-2.17e-05			4.95	-2.15e-05			4.95	-2.15e-05			4.95	-2.16e-05			4.95	-2.1e-05			4.95	-2.15e-05
5.95	-4.43e-05			5.95	-4.43e-05			5.95	-4.43e-05			5.95	-4.41e-05			5.95	-4.43e-05			5.95	-4.37e-05			5.95	-4.37e-05			5.95	-4.42e-05			5.95	-4.2e-05			5.95	-4.36e-05
6.95	-7.88e-05			6.95	-7.88e-05			6.95	-7.87e-05			6.95	-7.82e-05			6.95	-7.87e-05			6.95	-7.76e-05			6.95	-7.73e-05			6.95	-7.85e-05			6.95	-7.49e-05			6.95	-7.69e-05
7.95	-9.56e-05			7.95	-9.56e-05			7.95	-9.54e-05			7.95	-9.42e-05			7.95	-9.54e-05			7.95	-9.33e-05			7.95	-9.19e-05			7.95	-9.51e-05			7.95	-8.9e-05			7.95	-9.11e-05
8.95	-0.0001168			8.95	-0.0001168			8.95	-0.0001165			8.95	-0.0001147			8.95	-0.0001165			8.95	-0.0001138			8.95	-0.0001113			8.95	-0.0001161			8.95	-0.0001073			8.95	-0.0001102
9.95	-0.0001444			9.95	-0.0001444			9.95	-0.000144			9.95	-0.0001413			9.95	-0.000144			9.95	-0.0001404			9.95	-0.0001363			9.95	-0.0001436			9.95	-0.0001314			9.95	-0.0001345
10.95	-0.0002212			10.95	-0.0002211			10.95	-0.0002206			10.95	-0.0002165			10.95	-0.0002205			10.95	-0.000214			10.95	-0.0002088			10.95	-0.0002196			10.95	-0.0002004			10.95	-0.0002062
11.95	-0.0002928			11.95	-0.0002927			11.95	-0.0002918			11.95	-0.0002861			11.95	-0.0002917			11.95	-0.0002821			11.95	-0.0002755			11.95	-0.0002904			11.95	-0.0002624			11.95	-0.0002716
12.95	-0.0003225			12.95	-0.0003224			12.95	-0.0003214			12.95	-0.0003136			12.95	-0.0003213			12.95	-0.0003091			12.95	-0.0002993			12.95	-0.0003198			12.95	-0.000285			12.95	-0.0002944
13.95	-0.0003357			13.95	-0.0003355			13.95	-0.0003342			13.95	-0.0003246			13.95	-0.0003342			13.95	-0.0003198			13.95	-0.000306			13.95	-0.0003324			13.95	-0.0002917			13.95	-0.0002994
14.95	-0.0003792			14.95	-0.000379			14.95	-0.0003774			14.95	-0.0003654			14.95	-0.0003774			14.95	-0.0003606			14.95	-0.0003427			14.95	-0.0003752			14.95	-0.0003296			14.95	-0.0003343
15.95	-0.0004103			15.95	-0.0004101			15.95	-0.000408			15.95	-0.0003935			15.95	-0.0004081			15.95	-0.0003891			15.95	-0.0003664			15.95	-0.0004055			15.95	-0.0003538			15.95	-0.0003565
16.95	-0.0003337			16.95	-0.0003336			16.95	-0.0003316			16.95	-0.000316			16.95	-0.0003319			16.95	-0.0003145			16.95	-0.0002868			16.95	-0.0003297			16.95	-0.0002788			16.95	-0.0002758
17.95	-0.0001236			17.95	-0.0001236			17.95	-0.0001216			17.95	-0.0001054			17.95	-0.0001221			17.95	-0.0001064			17.95	-7.46e-05			17.95	-0.0001203			17.95	-7.66e-05			17.95	-6.25e-05
18.95	0.00024			18.95	0.00024			18.95	0.0002419			18.95	0.0002576			18.95	0.0002411			18.95	0.0002535			18.95	0.0002882			18.95	0.0002425			18.95	0.0002683			18.95	0.0003006
19.95	0.000744			19.95	0.0007438			19.95	0.0007453			19.95	0.0007583			19.95	0.0007441			19.95	0.0007458			19.95	0.0007825			19.95	0.0007443			19.95	0.0007506			19.95	0.0007927
20.95	0.0015345			20.95	0.0015341			20.95	0.0015347			20.95	0.0015426			20.95	0.0015333			20.95	0.0015281			20.95	0.0015582			20.95	0.001532			20.95	0.00151			20.95	0.0015665
21.95	0.0024183			21.95	0.0024178			21.95	0.0024175			21.95	0.0024176			21.95	0.0024161			21.95	0.0024052			21.95	0.0024196			21.95	0.0024138			21.95	0.0023702			21.95	0.0024239
22.95	0.003139			22.95	0.0031383			22.95	0.0031363			22.95	0.0031225			22.95	0.0031348			22.95	0.0030976			22.95	0.0030921			22.95	0.0031295			22.95	0.0030387			22.95	0.0030847
23.95	0.0038238			23.95	0.0038235			23.95	0.0038201			23.95	0.0037917			23.95	0.0038191			23.95	0.0037702			23.95	0.0037349			23.95	0.0038123			23.95	0.0036749			23.95	0.0037173
24.95	0.0045936			24.95	0.0045939			24.95	0.0045894			24.95	0.0045453			24.95	0.0045896			24.95	0.0045334			24.95	0.0044667			24.95	0.0045813			24.95	0.0043957			24.95	0.0044377
25.95	0.0053076			25.95	0.0053085			25.95	0.0053019			25.95	0.0052483			25.95	0.0053032			25.95	0.005235			25.95	0.0051327			25.95	0.0052953			25.95	0.0050864			25.95	0.005093
26.95	0.0061289			26.95	0.0061307			26.95	0.0061219			26.95	0.0060499			26.95	0.0061245			26.95	0.0060445			26.95	0.0059008			26.95	0.0061137			26.95	0.005856			26.95	0.0058407
27.95	0.0069337			27.95	0.006936			27.95	0.0069237			27.95	0.0068331			27.95	0.0069279			27.95	0.0068431			27.95	0.0066564			27.95	0.0069161			27.95	0.0066135			27.95	0.0065843
28.95	0.0080061			28.95	0.0080087			28.95	0.0079903			28.95	0.0078715			28.95	0.0079955			28.95	0.0078671			28.95	0.0076331			28.95	0.0079773			28.95	0.0076561			28.95	0.0075475
29.95	0.0088702			29.95	0.008875			29.95	0.0088545			29.95	0.0086986			29.95	0.0088641			29.95	0.0087204			29.95	0.0084101			29.95	0.0088447			29.95	0.0085312			29.95	0.0083042
30.95	0.0095044			30.95	0.0095077			30.95	0.0094739			30.95	0.0092748			30.95	0.0094828			30.95	0.0093054			30.95	0.0089241			30.95	0.0094524			30.95	0.0091339			30.95	0.0087896
31.95	0.0096548			31.95	0.0096603			31.95	0.009618			31.95	0.0093726			31.95	0.0096304			31.95	0.009436			31.95	0.0089902			31.95	0.0095951			31.95	0.0092281			31.95	0.0088228
32.95	0.0098791			32.95	0.0098887			32.95	0.009843			32.95	0.0095558			32.95	0.0098596			32.95	0.0095975			32.95	0.0090764			32.95	0.009817			32.95	0.0093652			32.95	0.0089046
33.95	0.010065			33.95	0.0100795			33.95	0.0100372			33.95	0.0097274			33.95	0.010059			33.95	0.0097742			33.95	0.0091787			33.95	0.0100136			33.95	0.0094781			33.95	0.008969
34.95	0.0101922			34.95	0.0102094			34.95	0.0101638			34.95	0.0098385			34.95	0.0101912			34.95	0.009872			34.95	0.0092435			34.95	0.0101539			34.95	0.0095569			34.95	0.009009
35.95	0.010224			35.95	0.0102472			35.95	0.010209			35.95	0.0098772			35.95	0.0102421			35.95	0.0099166			35.95	0.0092159			35.95	0.0102194			35.95	0.0095993			35.95	0.0089604
36.95	0.0101533			36.95	0.0101834			36.95	0.0101508			36.95	0.0098654			36.95	0.0101936			36.95	0.0098814			36.95	0.0091121			36.95	0.0101969			36.95	0.0095191			36.95	0.0088367
37.95	0.0100749			37.95	0.0101092			37.95	0.0100746			37.95	0.0098602			37.95	0.0101201			37.95	0.0098559			37.95	0.0090343			37.95	0.0101235			37.95	0.0094176			37.95	0.0087211
38.95	0.0100086			38.95	0.010046			38.95	0.0100087			38.95	0.0098191			38.95	0.0100586			38.95	0.0098818			38.95	0.0089731			38.95	0.0100616			38.95	0.0093134			38.95	0.0086358
39.95	0.0098556			39.95	0.0098999			39.95	0.0098665			39.95	0.009706			39.95	0.0099259			39.95	0.0098231			39.95	0.0088753			39.95	0.0099359			39.95	0.0091982			39.95	0.0085289
40.95	0.0096038			40.95	0.009653			40.95	0.0096159			40.95	0.0094737			40.95	0.0096798			40.95	0.0096323			40.95	0.0086865			40.95	0.0096948			40.95	0.0090318			40.95	0.0083287
41.95	0.009267			41.95	0.0093244			41.95	0.0092951			41.95	0.0092262			41.95	0.0093669			41.95	0.0094049			41.95	0.0084803			41.95	0.0093964			41.95	0.0088229			41.95	0.0081129
42.95	0.0089113			42.95	0.0089718			42.95	0.0089372			42.95	0.0089476			42.95	0.0090187			42.95	0.0091778			42.95	0.0083816			42.95	0.0090666			42.95	0.0086866			42.95	0.0080167
43.95	0.0086172			43.95	0.0086813			43.95	0.008638			43.95	0.0086516			43.95	0.0087176			43.95	0.0088306			43.95	0.0082422			43.95	0.0087447			43.95	0.0085732			43.95	0.0079088
44.95	0.0083549			44.95	0.0084229			44.95	0.0083739			44.95	0.0083886			44.95	0.0084604			44.95	0.0085463			44.95	0.0080332			44.95	0.0084909			44.95	0.0085354			44.95	0.0078256
45.95	0.0079386			45.95	0.0080116			45.95	0.0079608			45.95	0.0080405			45.95	0.0080524			45.95	0.0081907			45.95	0.0077401			45.95	0.0080974			45.95	0.0084192			45.95	0.0075699
46.95	0.0075286			46.95	0.007605			46.95	0.0075441			46.95	0.007615			46.95	0.0076392			46.95	0.0078021			46.95	0.007536			46.95	0.0076678			46.95	0.0082882			46.95	0.0073412
47.95	0.0070356			47.95	0.0071193			47.95	0.007067			47.95	0.0071153			47.95	0.0071696			47.95	0.007306			47.95	0.0072993			47.95	0.0072134			47.95	0.0081063			47.95	0.0071883
48.95	0.0063511			48.95	0.0064442			48.95	0.006403			48.95	0.0065948			48.95	0.0065188			48.95	0.0067778			48.95	0.0069377			48.95	0.0065796			48.95	0.0078493			48.95	0.0070165
49.95	0.0053569			49.95	0.0054593			49.95	0.005439			49.95	0.0058556			49.95	0.0055781			49.95	0.0061155			49.95	0.0064721			49.95	0.0057095			49.95	0.0076221			49.95	0.0067047
50.95	0.0040346			50.95	0.0041443			50.95	0.0041268			50.95	0.0048061			50.95	0.0042725			50.95	0.0052198			50.95	0.0059372			50.95	0.0044377			50.95	0.0073999			50.95	0.0062929
51.95	0.0029802			51.95	0.0030889			51.95	0.0030573			51.95	0.0034958			51.95	0.0031946			51.95	0.0039092			51.95	0.0051861			51.95	0.0033133			51.95	0.0071276			51.95	0.0058073
52.95	0.0022364			52.95	0.002342			52.95	0.0022924			52.95	0.0026368			52.95	0.00242			52.95	0.0028627			52.95	0.0040484			52.95	0.002499			52.95	0.0067754			52.95	0.005061
53.95	0.0017969			53.95	0.0018988			53.95	0.0018312			53.95	0.0019847			53.95	0.0019515			53.95	0.0021164			53.95	0.0029667			53.95	0.0019963			53.95	0.0063704			53.95	0.0040576
54.95	0.0014688			54.95	0.001572			54.95	0.0015018			54.95	0.0015984			54.95	0.0016189			54.95	0.0015767			54.95	0.0021895			54.95	0.0016431			54.95	0.0057318			54.95	0.0031262
55.95	0.0011523			55.95	0.0012586			55.95	0.0011942			55.95	0.0012537			55.95	0.0013133			55.95	0.0012138			55.95	0.0016187			55.95	0.0013412			55.95	0.0047123			55.95	0.0023885
56.95	0.0007765			56.95	0.0008845			56.95	0.0008091			56.95	0.0009713			56.95	0.0009293			56.95	0.000901			56.95	0.0011692			56.95	0.0009745			56.95	0.0035531			56.95	0.0018425
57.95	0.0004267			57.95	0.0005316			57.95	0.0004634			57.95	0.0006164			57.95	0.0005808			57.95	0.0006069			57.95	0.0007329			57.95	0.0005883			57.95	0.0024097			57.95	0.0014705
58.95	0.0001459			58.95	0.0002472			58.95	0.0001596			58.95	0.0002576			58.95	0.0002724			58.95	0.0002701			58.95	0.0003237			58.95	0.0002784			58.95	0.0015185			58.95	0.0010958
59.95	-3.43e-05			59.95	6.31e-05			59.95	-4.02e-05			59.95	-2.28e-05			59.95	6.2e-05			59.95	-0.0001082			59.95	-2.93e-05			59.95	5.58e-05			59.95	0.0007882			59.95	0.0007187
60.95	-0.0001398			60.95	-4.63e-05			60.95	-0.0001382			60.95	-0.0002162			60.95	-3.76e-05			60.95	-0.0003747			60.95	-0.0002392			60.95	-8.32e-05			60.95	7.78e-05			60.95	0.0002608
61.95	-0.0001306			61.95	-4.19e-05			61.95	-0.0001581			61.95	-0.0003445			61.95	-6.69e-05			61.95	-0.0005601			61.95	-0.0003924			61.95	-0.0001113			61.95	-0.000621			61.95	-0.0001814
62.95	-6.04e-05			62.95	2.31e-05			62.95	-9.81e-05			62.95	-0.0003457			62.95	-1.28e-05			62.95	-0.0006359			62.95	-0.0005299			62.95	-9.83e-05			62.95	-0.001291			62.95	-0.0005331
63.95	-4.9e-06			63.95	7.81e-05			63.95	-3.68e-05			63.95	-0.0003399			63.95	4.84e-05			63.95	-0.0006484			63.95	-0.0006833			63.95	-2.3e-05			63.95	0.0007765			63.95	-0.0007393
64.95	6.52e-05			64.95	0.0001443			64.95	1.62e-05			64.95	-0.0003398			64.95	9.43e-05			64.95	-0.0006315			64.95	-0.0008233			64.95	2.37e-05			64.95	0.001301			64.95	-0.0008962
65.95	0.0001818			65.95	0.0002535			65.95	0.0001259			65.95	-0.0002964			65.95	0.0002035			65.95	-0.0005904			65.95	-0.0008177			65.95	9.95e-05			65.95	0.0013186			65.95	-0.0010403
66.95	0.0002986			66.95	0.0003735			66.95	0.0002548			66.95	-0.0002314			66.95	0.0003265			66.95	-0.0005486			66.95	-0.0008306			66.95	0.0002126			66.95	0.0012703			66.95	0.0007384
67.95	0.0003146			67.95	0.0003912			67.95	0.0003005			67.95	-0.000168			67.95	0.0003843			67.95	-0.0004869			67.95	-0.0008133			67.95	0.0003286			67.95	0.0011929			67.95	0.0010447
68.95	0.0002818			68.95	0.0003561			68.95	0.0002744			68.95	-6.93e-05			68.95	0.0003595			68.95	-0.0004086			68.95	-0.0008042			68.95	0.0003305			68.95	0.0011056			68.95	0.0010687
69.95	0.000298			69.95	0.0003672			69.95	0.0002847			69.95	-8.03e-05			69.95	0.0003613			69.95	-0.0003506			69.95	-0.0007949			69.95	0.0003178			69.95	0.0010213			69.95	0.0010438
70.95	0.0003877			70.95	0.000453			70.95	0.0003696			70.95	-5.81e-05			70.95	0.0004412			70.95	-0.0002742			70.95	-0.0007593			70.95	0.0003997			70.95	0.0009461			70.95	0.0010051
71.95	0.0005065			71.95	0.0005677			71.95	0.0004899			71.95	6.33e-05			71.95	0.0005571			71.95	-0.0001743			71.95	-0.0007497			71.95	0.0005165			71.95	0.0008818			71.95	0.000965
72.95	0.0006135			72.95	0.0006737			72.95	0.0006073			72.95	0.0002336			72.95	0.0006722			72.95	-3.22e-05			72.95	-0.0007489			72.95	0.0006399			72.95	0.0008277			72.95	0.0009276
73.95	0.0006707			73.95	0.0007287			73.95	0.0006722			73.95	0.0004144			73.95	0.0007383			73.95	0.0001439			73.95	-0.0006953			73.95	0.0007312			73.95	0.000782			73.95	0.0008937
74.95	0.0006707			74.95	0.000725			74.95	0.0006728			74.95	0.000599			74.95	0.0007355			74.95	0.0003358			74.95	-0.0005372			74.95	0.0007362			74.95	0.0007428			74.95	0.0008631
75.95	0.0006522			75.95	0.0007014			75.95	0.0006536			75.95	0.0006716			75.95	0.0007149			75.95	0.0005266			75.95	-0.000357			75.95	0.0007239			75.95	0.0007085			75.95	0.0008351
76.95	0.0006322			76.95	0.0006776			76.95	0.0006334			76.95	0.0006612			76.95	0.0006906			76.95	0.0006078			76.95	-0.0001833			76.95	0.0006955			76.95	0.0006778			76.95	0.0008094
77.95	0.0006187			77.95	0.0006592			77.95	0.0006157			77.95	0.0006472			77.95	0.0006677			77.95	0.0006051			77.95	-3.07e-05			77.95	0.0006723			77.95	0.0006501			77.95	0.0007853
78.95	0.0006048			78.95	0.0006405			78.95	0.0006009			78.95	0.0006214			78.95	0.0006484			78.95	0.0005894			78.95	0.0001185			78.95	0.0006509			78.95	0.0006247			78.95	0.0007626
79.95	0.000589			79.95	0.0006196			79.95	0.0005828			79.95	0.0006048			79.95	0.0006269			79.95	0.0005652			79.95	0.0002375			79.95	0.0006284			79.95	0.000601			79.95	0.0007412
80.95	0.000577			80.95	0.0006033			80.95	0.0005695			80.95	0.0005854			80.95	0.0006092			80.95	0.0005447			80.95	0.0003333			80.95	0.0006085			80.95	0.0005789			80.95	0.000721
81.95	0.0005585			81.95	0.0005807			81.95	0.0005517			81.95	0.000567			81.95	0.0005867			81.95	0.0005299			81.95	0.0004117			81.95	0.0005892			81.95	0.0005579			81.95	0.000702
82.95	0.0005408			82.95	0.000557			82.95	0.000529			82.95	0.0005562			82.95	0.00056			82.95	0.0005067			82.95	0.000448			82.95	0.0005651			82.95	0.000538			82.95	0.0006842
83.95	0.0005179			83.95	0.0005304			83.95	0.000509			83.95	0.0005391			83.95	0.0005362			83.95	0.0004895			83.95	0.0004657			83.95	0.0005397			83.95	0.000519			83.95	0.0006676
84.95	0.0005059			84.95	0.0005116			84.95	0.0004884			84.95	0.0005217			84.95	0.0005097			84.95	0.0004787			84.95	0.0004644			84.95	0.0005106			84.95	0.0005008			84.95	0.0006519
85.95	0.0004973			85.95	0.0004979			85.95	0.0004769			85.95	0.0005013			85.95	0.0004935			85.95	0.0004614			85.95	0.0004595			85.95	0.0004917			85.95	0.0004833			85.95	0.0006371
86.95	0.0004901			86.95	0.0004855			86.95	0.0004671			86.95	0.0004784			86.95	0.0004791			86.95	0.0004433			86.95	0.0004487			86.95	0.0004763			86.95	0.0004665			86.95	0.0006231
87.95	0.0004835			87.95	0.0004738			87.95	0.0004582			87.95	0.0004669			87.95	0.0004657			87.95	0.0004205			87.95	0.0004326			87.95	0.0004622			87.95	0.0004502			87.95	0.0006097
88.95	0.0004774			88.95	0.0004625			88.95	0.0004497			88.95	0.0004581			88.95	0.0004527			88.95	0.0003969			88.95	0.0004155			88.95	0.0004487			88.95	0.0004345			88.95	0.0005968
89.95	0.0004714			89.95	0.0004515			89.95	0.0004415			89.95	0.0004506			89.95	0.00044			89.95	0.0003841			89.95	0.0004039			89.95	0.0004357			89.95	0.0004193			89.95	0.0005844
90.95	0.0004657			90.95	0.0004406			90.95	0.0004335			90.95	0.0004438			90.95	0.0004276			90.95	0.0003735			90.95	0.000386			90.95	0.0004228			90.95	0.0004046			90.95	0.0005723
91.95	0.0004602			91.95	0.00043			91.95	0.0004257			91.95	0.0004374			91.95	0.0004153			91.95	0.0003638			91.95	0.0003785			91.95	0.0004102			91.95	0.0003903			91.95	0.0005605
92.95	0.0004548			92.95	0.0004195			92.95	0.000418			92.95	0.0004314			92.95	0.0004033			92.95	0.0003547			92.95	0.0003702			92.95	0.0003978			92.95	0.0003765			92.95	0.0005488
93.95	0.0004497			93.95	0.0004093			93.95	0.0004106			93.95	0.0004257			93.95	0.0003915			93.95	0.0003458			93.95	0.0003601			93.95	0.0003856			93.95	0.0003631			93.95	0.0005372
94.95	0.0004448			94.95	0.0003993			94.95	0.0004033			94.95	0.0004203			94.95	0.0003799			94.95	0.0003371			94.95	0.0003566			94.95	0.0003736			94.95	0.00035			94.95	0.0005258
95.95	0.00044			95.95	0.0003895			95.95	0.0003963			95.95	0.0004152			95.95	0.0003685			95.95	0.0003285			95.95	0.0003559			95.95	0.0003618			95.95	0.0003374			95.95	0.0005145
96.95	0.0004355			96.95	0.0003799			96.95	0.0003895			96.95	0.0004103			96.95	0.0003573			96.95	0.00032			96.95	0.0003515			96.95	0.0003503			96.95	0.0003252			96.95	0.0005034
97.95	0.0004312			97.95	0.0003705			97.95	0.0003828			97.95	0.0004056			97.95	0.0003464			97.95	0.0003117			97.95	0.0003464			97.95	0.0003389			97.95	0.0003132			97.95	0.0004924
98.95	0.000427			98.95	0.0003613			98.95	0.0003764			98.95	0.0004012			98.95	0.0003357			98.95	0.0003036			98.95	0.0003449			98.95	0.0003279			98.95	0.0003017			98.95	0.0004816
99.95	0.0004231			99.95	0.0003524			99.95	0.0003701			99.95	0.000397			99.95	0.0003253			99.95	0.0002956			99.95	0.0003406			99.95	0.000317			99.95	0.0002905			99.95	0.000471
100.95	0.0004193			100.95	0.0003436			100.95	0.0003641			100.95	0.0003931			100.95	0.000315			100.95	0.0002878			100.95	0.0003396			100.95	0.0003064			100.95	0.0002796			100.95	0.0004606
101.95	0.0004158			101.95	0.0003351			101.95	0.0003583			101.95	0.0003894			101.95	0.000305			101.95	0.0002801			101.95	0.000337			101.95	0.000296			101.95	0.000269			101.95	0.0004504
102.95	0.0004124			102.95	0.0003268			102.95	0.0003526			102.95	0.0003859			102.95	0.0002952			102.95	0.0002726			102.95	0.0003345			102.95	0.0002858			102.95	0.0002587			102.95	0.0004404
103.95	0.0004092			103.95	0.0003187			103.95	0.0003471			103.95	0.0003827			103.95	0.0002857			103.95	0.0002653			103.95	0.0003317			103.95	0.0002758			103.95	0.0002487			103.95	0.0004306
104.95	0.0004062			104.95	0.0003108			104.95	0.0003419			104.95	0.0003796			104.95	0.0002763			104.95	0.0002581			104.95	0.0003284			104.95	0.0002661			104.95	0.000239			104.95	0.0004211
105.95	0.0004034			105.95	0.000303			105.95	0.0003368			105.95	0.0003767			105.95	0.0002672			105.95	0.0002511			105.95	0.0003248			105.95	0.0002566			105.95	0.0002296			105.95	0.0004117
106.95	0.0004007			106.95	0.0002955			106.95	0.0003318			106.95	0.0003741			106.95	0.0002582			106.95	0.0002443			106.95	0.0003211			106.95	0.0002473			106.95	0.0002204			106.95	0.0004026
107.95	0.0003982			107.95	0.0002882			107.95	0.000327			107.95	0.0003716			107.95	0.0002495			107.95	0.0002376			107.95	0.0003173			107.95	0.0002382			107.95	0.0002115			107.95	0.0003937
108.95	0.0003958			108.95	0.000281			108.95	0.0003224			108.95	0.0003693			108.95	0.0002409			108.95	0.0002311			108.95	0.0003135			108.95	0.0002293			108.95	0.0002028			108.95	0.0003851
109.95	0.0003936			109.95	0.000274			109.95	0.000318			109.95	0.0003671			109.95	0.0002326			109.95	0.0002248			109.95	0.0003097			109.95	0.0002205			109.95	0.0001944			109.95	0.0003766
110.95	0.0003915			110.95	0.0002671			110.95	0.0003137			110.95	0.0003651			110.95	0.0002244			110.95	0.0002186			110.95	0.000306			110.95	0.000212			110.95	0.0001863			110.95	0.0003684
111.95	0.0003895			111.95	0.0002605			111.95	0.0003095			111.95	0.0003633			111.95	0.0002164			111.95	0.0002125			111.95	0.0003023			111.95	0.0002036			111.95	0.0001783			111.95	0.0003604
112.95	0.0003877			112.95	0.0002539			112.95	0.0003054			112.95	0.0003616			112.95	0.0002085			112.95	0.0002066			112.95	0.0002988			112.95	0.0001955			112.95	0.0001706			112.95	0.0003527
113.95	0.0003859			113.95	0.0002475			113.95	0.0003015			113.95	0.00036			113.95	0.0002009			113.95	0.0002009			113.95	0.0002954			113.95	0.0001874			113.95	0.0001631			113.95	0.0003451
114.95	0.0003843			114.95	0.0002413			114.95	0.0002977			114.95	0.0003585			114.95	0.0001933			114.95	0.0001952			114.95	0.000292			114.95	0.0001796			114.95	0.0001558			114.95	0.0003377
115.95	0.0003828			115.95	0.0002351			115.95	0.000294			115.95	0.0003572			115.95	0.0001859			115.95	0.0001897			115.95	0.0002888			115.95	0.0001719			115.95	0.0001486			115.95	0.0003305
116.95	0.0003813			116.95	0.0002291			116.95	0.0002904			116.95	0.0003559			116.95	0.0001787			116.95	0.0001843			116.95	0.0002858			116.95	0.0001643			116.95	0.0001417			116.95	0.0003236
117.95	0.00038			117.95	0.0002232			117.95	0.0002869			117.95	0.0003547			117.95	0.0001716			117.95	0.0001789			117.95	0.0002828			117.95	0.0001568			117.95	0.000135			117.95	0.0003168
118.95	0.0003787			118.95	0.0002174			118.95	0.0002834			118.95	0.0003537			118.95	0.0001646			118.95	0.0001737			118.95	0.0002799			118.95	0.0001495			118.95	0.0001284			118.95	0.0003102
119.95	0.0003774			119.95	0.0002117			119.95	0.0002801			119.95	0.0003526			119.95	0.0001577			119.95	0.0001686			119.95	0.0002772			119.95	0.0001423			119.95	0.0001219			119.95	0.0003038
120.95	0.0003763			120.95	0.0002061			120.95	0.0002768			120.95	0.0003517			120.95	0.0001509			120.95	0.0001636			120.95	0.0002745			120.95	0.0001352			120.95	0.0001157			120.95	0.0002976
121.95	0.0003751			121.95	0.0002006			121.95	0.0002736			121.95	0.0003508			121.95	0.0001442			121.95	0.0001586			121.95	0.0002719			121.95	0.0001283			121.95	0.0001095			121.95	0.0002915
122.95	0.0003741			122.95	0.0001951			122.95	0.0002704			122.95	0.0003499			122.95	0.0001376			122.95	0.0001537			122.95	0.0002695			122.95	0.0001214			122.95	0.0001035			122.95	0.0002857
123.95	0.000373			123.95	0.0001898			123.95	0.0002672			123.95	0.0003491			123.95	0.0001311			123.95	0.0001488			123.95	0.0002671			123.95	0.0001146			123.95	9.76e-05			123.95	0.0002799
124.95	0.000372			124.95	0.0001844			124.95	0.0002641			124.95	0.0003483			124.95	0.0001247			124.95	0.000144			124.95	0.0002648			124.95	0.0001079			124.95	9.19e-05			124.95	0.0002744
125.95	0.0003709			125.95	0.0001791			125.95	0.0002611			125.95	0.0003475			125.95	0.0001183			125.95	0.0001393			125.95	0.0002626			125.95	0.0001012			125.95	8.62e-05			125.95	0.000269
126.95	0.0003699			126.95	0.0001739			126.95	0.000258			126.95	0.0003467			126.95	0.000112			126.95	0.0001346			126.95	0.0002605			126.95	9.47e-05			126.95	8.07e-05			126.95	0.0002637
127.95	0.0003689			127.95	0.0001687			127.95	0.000255			127.95	0.000346			127.95	0.0001058			127.95	0.0001299			127.95	0.0002585			127.95	8.81e-05			127.95	7.52e-05			127.95	0.0002586
128.95	0.0003679			128.95	0.0001636			128.95	0.0002519			128.95	0.0003452			128.95	9.96e-05			128.95	0.0001252			128.95	0.0002565			128.95	8.17e-05			128.95	6.98e-05			128.95	0.0002536
129.95	0.0003669			129.95	0.0001584			129.95	0.0002489			129.95	0.0003444			129.95	9.34e-05			129.95	0.0001206			129.95	0.0002546			129.95	7.53e-05			129.95	6.45e-05			129.95	0.0002487
130.95	0.0003658			130.95	0.0001533			130.95	0.0002459			130.95	0.0003436			130.95	8.73e-05			130.95	0.000116			130.95	0.0002527			130.95	6.89e-05			130.95	5.93e-05			130.95	0.000244
131.95	0.0003647			131.95	0.0001482			131.95	0.0002428			131.95	0.0003428			131.95	8.13e-05			131.95	0.0001113			131.95	0.0002509			131.95	6.26e-05			131.95	5.41e-05			131.95	0.0002394
132.95	0.0003636			132.95	0.0001431			132.95	0.0002398			132.95	0.000342			132.95	7.52e-05			132.95	0.0001067			132.95	0.0002492			132.95	5.63e-05			132.95	4.9e-05			132.95	0.0002349
133.95	0.0003625			133.95	0.000138			133.95	0.0002367			133.95	0.0003411			133.95	6.92e-05			133.95	0.0001021			133.95	0.0002475			133.95	5e-05			133.95	4.39e-05			133.95	0.0002306
134.95	0.0003613			134.95	0.000133			134.95	0.0002336			134.95	0.0003402			134.95	6.32e-05			134.95	9.74e-05			134.95	0.0002458			134.95	4.38e-05			134.95	3.88e-05			134.95	0.0002263
135.95	0.0003601			135.95	0.0001279			135.95	0.0002304			135.95	0.0003392			135.95	5.72e-05			135.95	9.28e-05			135.95	0.0002442			135.95	3.75e-05			135.95	3.38e-05			135.95	0.0002221
136.95	0.0003588			136.95	0.0001228			136.95	0.0002273			136.95	0.0003383			136.95	5.12e-05			136.95	8.81e-05			136.95	0.0002427			136.95	3.13e-05			136.95	2.89e-05			136.95	0.0002181
137.95	0.0003575			137.95	0.0001177			137.95	0.0002241			137.95	0.0003372			137.95	4.52e-05			137.95	8.34e-05			137.95	0.0002411			137.95	2.51e-05			137.95	2.39e-05			137.95	0.0002141
138.95	0.0003562			138.95	0.0001126			138.95	0.0002208			138.95	0.0003362			138.95	3.92e-05			138.95	7.86e-05			138.95	0.0002396			138.95	1.9e-05			138.95	1.9e-05			138.95	0.0002103
139.95	0.0003548			139.95	0.0001074			139.95	0.0002175			139.95	0.000335			139.95	3.33e-05			139.95	7.39e-05			139.95	0.0002382			139.95	1.28e-05			139.95	1.41e-05			139.95	0.0002065
140.95	0.0003533			140.95	0.0001023			140.95	0.0002142			140.95	0.0003339			140.95	2.73e-05			140.95	6.91e-05			140.95	0.0002367			140.95	6.6e-06			140.95	9.1e-06			140.95	0.0002029
141.95	0.0003518			141.95	9.72e-05			141.95	0.0002108			141.95	0.0003327			141.95	2.13e-05			141.95	6.43e-05			141.95	0.0002354			141.95	4e-07			141.95	4.2e-06			141.95	0.0001993
142.95	0.0003502			142.95	9.2e-05			142.95	0.0002074			142.95	0.0003314			142.95	1.54e-05			142.95	5.94e-05			142.95	0.000234			142.95	-5.7e-06			142.95	-7e-07			142.95	0.0001958
143.95	0.0003486			143.95	8.68e-05			143.95	0.000204			143.95	0.0003301			143.95	9.4e-06			143.95	5.45e-05			143.95	0.0002326			143.95	-1.19e-05			143.95	-5.6e-06			143.95	0.0001924
144.95	0.0003469			144.95	8.16e-05			144.95	0.0002005			144.95	0.0003288			144.95	3.4e-06			144.95	4.96e-05			144.95	0.0002313			144.95	-1.81e-05			144.95	-1.05e-05			144.95	0.000189
145.95	0.0003452			145.95	7.64e-05			145.95	0.000197			145.95	0.0003274			145.95	-2.6e-06			145.95	4.47e-05			145.95	0.0002301			145.95	-2.42e-05			145.95	-1.54e-05			145.95	0.0001858
146.95	0.0003434			146.95	7.11e-05			146.95	0.0001934			146.95	0.000326			146.95	-8.5e-06			146.95	3.97e-05			146.95	0.0002288			146.95	-3.04e-05			146.95	-2.03e-05			146.95	0.0001826
147.95	0.0003416			147.95	6.59e-05			147.95	0.0001898			147.95	0.0003245			147.95	-1.45e-05			147.95	3.47e-05			147.95	0.0002276			147.95	-3.65e-05			147.95	-2.53e-05			147.95	0.0001795
148.95	0.0003398			148.95	6.06e-05			148.95	0.0001861			148.95	0.000323			148.95	-2.05e-05			148.95	2.96e-05			148.95	0.0002264			148.95	-4.27e-05			148.95	-3.02e-05			148.95	0.0001764
149.95	0.0003379			149.95	5.53e-05			149.95	0.0001824			149.95	0.0003215			149.95	-2.65e-05			149.95	2.45e-05			149.95	0.0002253			149.95	-4.88e-05			149.95	-3.52e-05			149.95	0.0001735
150.95	0.0003359			150.95	5e-05			150.95	0.0001787			150.95	0.00032			150.95	-3.24e-05			150.95	1.94e-05			150.95	0.0002242			150.95	-5.5e-05			150.95	-4.01e-05			150.95	0.0001706
151.95	0.0003339			151.95	4.47e-05			151.95	0.000175			151.95	0.0003184			151.95	-3.84e-05			151.95	1.43e-05			151.95	0.0002231			151.95	-6.11e-05			151.95	-4.51e-05			151.95	0.0001677
152.95	0.0003319			152.95	3.94e-05			152.95	0.0001712			152.95	0.0003168			152.95	-4.44e-05			152.95	9.1e-06			152.95	0.000222			152.95	-6.72e-05			152.95	-5.01e-05			152.95	0.000165
153.95	0.0003299			153.95	3.41e-05			153.95	0.0001674			153.95	0.0003152			153.95	-5.03e-05			153.95	3.9e-06			153.95	0.000221			153.95	-7.33e-05			153.95	-5.51e-05			153.95	0.0001623
154.95	0.0003278			154.95	2.88e-05			154.95	0.0001636			154.95	0.0003136			154.95	-5.63e-05			154.95	-1.2e-06			154.95	0.0002201			154.95	-7.94e-05			154.95	-6.01e-05			154.95	0.0001597
155.95	0.0003258			155.95	2.35e-05			155.95	0.0001598			155.95	0.000312			155.95	-6.22e-05			155.95	-6.4e-06			155.95	0.0002192			155.95	-8.55e-05			155.95	-6.52e-05			155.95	0.0001571
156.95	0.0003237			156.95	1.82e-05			156.95	0.000156			156.95	0.0003104			156.95	-6.81e-05			156.95	-1.17e-05			156.95	0.0002183			156.95	-9.15e-05			156.95	-7.02e-05			156.95	0.0001546
157.95	0.0003216			157.95	1.29e-05			157.95	0.0001522			157.95	0.0003088			157.95	-7.4e-05			157.95	-1.69e-05			157.95	0.0002175			157.95	-9.76e-05			157.95	-7.52e-05			157.95	0.0001522
158.95	0.0003195			158.95	7.7e-06			158.95	0.0001483			158.95	0.0003073			158.95	-7.98e-05			158.95	-2.21e-05			158.95	0.0002167			158.95	-0.0001036			158.95	-8.03e-05			158.95	0.0001498
159.95	0.0003174			159.95	2.4e-06			159.95	0.0001445			159.95	0.0003057			159.95	-8.57e-05			159.95	-2.73e-05			159.95	0.0002159			159.95	-0.0001096			159.95	-8.53e-05			159.95	0.0001475
160.95	0.0003153			160.95	-2.8e-06			160.95	0.0001407			160.95	0.0003042			160.95	-9.15e-05			160.95	-3.25e-05			160.95	0.0002153			160.95	-0.0001155			160.95	-9.04e-05			160.95	0.0001452
161.95	0.0003133			161.95	-8e-06			161.95	0.0001369			161.95	0.0003027			161.95	-9.73e-05			161.95	-3.77e-05			161.95	0.0002147			161.95	-0.0001215			161.95	-9.54e-05			161.95	0.0001431
162.95	0.0003112			162.95	-1.32e-05			162.95	0.0001331			162.95	0.0003012			162.95	-0.000103			162.95	-4.29e-05			162.95	0.0002141			162.95	-0.0001273			162.95	-0.0001004			162.95	0.0001409
163.95	0.0003092			163.95	-1.84e-05			163.95	0.0001293			163.95	0.0002998			163.95	-0.0001087			163.95	-4.81e-05			163.95	0.0002136			163.95	-0.0001332			163.95	-0.0001054			163.95	0.0001389
164.95	0.0003072			164.95	-2.35e-05			164.95	0.0001256			164.95	0.0002984			164.95	-0.0001144			164.95	-5.33e-05			164.95	0.0002131			164.95	-0.000139			164.95	-0.0001104			164.95	0.0001369
165.95	0.0003053			165.95	-2.86e-05			165.95	0.0001219			165.95	0.000297			165.95	-0.00012			165.95	-5.84e-05			165.95	0.0002128			165.95	-0.0001447			165.95	-0.0001154			165.95	0.0001349
166.95	0.0003034			166.95	-3.36e-05			166.95	0.0001182			166.95	0.0002958			166.95	-0.0001256			166.95	-6.35e-05			166.95	0.0002125			166.95	-0.0001504			166.95	-0.0001204			166.95	0.000133
167.95	0.0003015			167.95	-3.86e-05			167.95	0.0001146			167.95	0.0002946			167.95	-0.0001311			167.95	-6.85e-05			167.95	0.0002122			167.95	-0.0001561			167.95	-0.0001254			167.95	0.0001312
168.95	0.0002997			168.95	-4.35e-05			168.95	0.000111			168.95	0.0002934			168.95	-0.0001365			168.95	-7.35e-05			168.95	0.000212			168.95	-0.0001617			168.95	-0.0001303			168.95	0.0001295
169.95	0.000298			169.95	-4.84e-05			169.95	0.0001075			169.95	0.0002924			169.95	-0.0001419			169.95	-7.85e-05			169.95	0.0002119			169.95	-0.0001672			169.95	-0.0001352			169.95	0.0001278
170.95	0.0002963			170.95	-5.32e-05			170.95	0.000104			170.95	0.0002914			170.95	-0.0001473			170.95	-8.34e-05			170.95	0.0002119			170.95	-0.0001727			170.95	-0.00014			170.95	0.0001261
171.95	0.0002947			171.95	-5.8e-05			171.95	0.0001006			171.95	0.0002905			171.95	-0.0001526			171.95	-8.83e-05			171.95	0.0002119			171.95	-0.0001781			171.95	-0.0001449			171.95	0.0001245
172.95	0.0002931			172.95	-6.26e-05			172.95	9.72e-05			172.95	0.0002896			172.95	-0.0001578			172.95	-9.31e-05			172.95	0.000212			172.95	-0.0001834			172.95	-0.0001496			172.95	0.000123
173.95	0.0002917			173.95	-6.73e-05			173.95	9.4e-05			173.95	0.0002889			173.95	-0.0001629			173.95	-9.79e-05			173.95	0.0002122			173.95	-0.0001887			173.95	-0.0001544			173.95	0.0001215
174.95	0.0002903			174.95	-7.18e-05			174.95	9.08e-05			174.95	0.0002883			174.95	-0.000168			174.95	-0.0001026			174.95	0.0002125			174.95	-0.0001939			174.95	-0.0001591			174.95	0.0001201
175.95	0.000289			175.95	-7.63e-05			175.95	8.76e-05			175.95	0.0002878			175.95	-0.000173			175.95	-0.0001072			175.95	0.0002128			175.95	-0.000199			175.95	-0.0001638			175.95	0.0001188
176.95	0.0002878			176.95	-8.07e-05			176.95	8.46e-05			176.95	0.0002873			176.95	-0.0001779			176.95	-0.0001118			176.95	0.0002132			176.95	-0.0002041			176.95	-0.0001684			176.95	0.0001175
177.95	0.0002867			177.95	-8.5e-05			177.95	8.16e-05			177.95	0.000287			177.95	-0.0001828			177.95	-0.0001163			177.95	0.0002137			177.95	-0.0002091			177.95	-0.0001729			177.95	0.0001163
178.95	0.0002857			178.95	-8.93e-05			178.95	7.88e-05			178.95	0.0002868			178.95	-0.0001875			178.95	-0.0001207			178.95	0.0002143			178.95	-0.0002139			178.95	-0.0001774			178.95	0.0001151
179.95	0.0002849			179.95	-9.34e-05			179.95	7.6e-05			179.95	0.0002867			179.95	-0.0001922			179.95	-0.000125			179.95	0.000215			179.95	-0.0002188			179.95	-0.0001818			179.95	0.000114
180.95	0.0002841			180.95	-9.75e-05			180.95	7.33e-05			180.95	0.0002868			180.95	-0.0001968			180.95	-0.0001292			180.95	0.0002157			180.95	-0.0002235			180.95	-0.0001862			180.95	0.0001129
181.95	0.0002834			181.95	-0.0001015			181.95	7.07e-05			181.95	0.0002869			181.95	-0.0002013			181.95	-0.0001334			181.95	0.0002166			181.95	-0.0002281			181.95	-0.0001905			181.95	0.0001119
182.95	0.0002829			182.95	-0.0001054			182.95	6.82e-05			182.95	0.0002872			182.95	-0.0002057			182.95	-0.0001375			182.95	0.0002175			182.95	-0.0002327			182.95	-0.0001948			182.95	0.0001109
183.95	0.0002825			183.95	-0.0001092			183.95	6.58e-05			183.95	0.0002876			183.95	-0.00021			183.95	-0.0001415			183.95	0.0002185			183.95	-0.0002371			183.95	-0.0001989			183.95	0.0001101
184.95	0.0002822			184.95	-0.0001129			184.95	6.35e-05			184.95	0.0002882			184.95	-0.0002143			184.95	-0.0001453			184.95	0.0002195			184.95	-0.0002415			184.95	-0.000203			184.95	0.0001092
185.95	0.000282			185.95	-0.0001165			185.95	6.13e-05			185.95	0.0002889			185.95	-0.0002184			185.95	-0.0001491			185.95	0.0002207			185.95	-0.0002458			185.95	-0.0002071			185.95	0.0001084
186.95	0.000282			186.95	-0.00012			186.95	5.93e-05			186.95	0.0002897			186.95	-0.0002225			186.95	-0.0001528			186.95	0.0002219			186.95	-0.00025			186.95	-0.000211			186.95	0.0001077
187.95	0.0002821			187.95	-0.0001234			187.95	5.73e-05			187.95	0.0002906			187.95	-0.0002264			187.95	-0.0001564			187.95	0.0002232			187.95	-0.0002541			187.95	-0.0002149			187.95	0.000107
188.95	0.0002823			188.95	-0.0001267			188.95	5.55e-05			188.95	0.0002917			188.95	-0.0002303			188.95	-0.0001599			188.95	0.0002246			188.95	-0.000258			188.95	-0.0002187			188.95	0.0001064
189.95	0.0002827			189.95	-0.0001299			189.95	5.38e-05			189.95	0.0002929			189.95	-0.000234			189.95	-0.0001633			189.95	0.0002261			189.95	-0.0002619			189.95	-0.0002224			189.95	0.0001058
190.95	0.0002833			190.95	-0.000133			190.95	5.22e-05			190.95	0.0002943			190.95	-0.0002377			190.95	-0.0001666			190.95	0.0002277			190.95	-0.0002658			190.95	-0.0002261			190.95	0.0001053
191.95	0.0002839			191.95	-0.000136			191.95	5.07e-05			191.95	0.0002958			191.95	-0.0002412			191.95	-0.0001698			191.95	0.0002293			191.95	-0.0002695			191.95	-0.0002296			191.95	0.0001049
192.95	0.0002847			192.95	-0.0001389			192.95	4.93e-05			192.95	0.0002975			192.95	-0.0002447			192.95	-0.0001729			192.95	0.000231			192.95	-0.0002731			192.95	-0.0002331			192.95	0.0001044
193.95	0.0002857			193.95	-0.0001416			193.95	4.81e-05			193.95	0.0002993			193.95	-0.000248			193.95	-0.0001759			193.95	0.0002328			193.95	-0.0002766			193.95	-0.0002365			193.95	0.0001041
194.95	0.0002868			194.95	-0.0001443			194.95	4.7e-05			194.95	0.0003013			194.95	-0.0002513			194.95	-0.0001787			194.95	0.0002347			194.95	-0.00028			194.95	-0.0002398			194.95	0.0001038
195.95	0.0002881			195.95	-0.0001469			195.95	4.6e-05			195.95	0.0003034			195.95	-0.0002545			195.95	-0.0001815			195.95	0.0002366			195.95	-0.0002833			195.95	-0.000243			195.95	0.0001035
196.95	0.0002895			196.95	-0.0001493			196.95	4.51e-05			196.95	0.0003057			196.95	-0.0002575			196.95	-0.0001841			196.95	0.0002387			196.95	-0.0002865			196.95	-0.0002461			196.95	0.0001033
197.95	0.0002911			197.95	-0.0001517			197.95	4.44e-05			197.95	0.0003081			197.95	-0.0002605			197.95	-0.0001867			197.95	0.0002408			197.95	-0.0002896			197.95	-0.0002491			197.95	0.0001031
198.95	0.0002928			198.95	-0.0001539			198.95	4.38e-05			198.95	0.0003106			198.95	-0.0002633			198.95	-0.0001891			198.95	0.0002429			198.95	-0.0002926			198.95	-0.0002521			198.95	0.000103
199.95	0.0002947			199.95	-0.0001561			199.95	4.33e-05			199.95	0.0003134			199.95	-0.0002661			199.95	-0.0001914			199.95	0.0002452			199.95	-0.0002955			199.95	-0.0002549			199.95	0.0001029
200.95	0.0002968			200.95	-0.0001581			200.95	4.3e-05			200.95	0.0003162			200.95	-0.0002687			200.95	-0.0001936			200.95	0.0002475			200.95	-0.0002983			200.95	-0.0002577			200.95	0.0001029
201.95	0.000299			201.95	-0.00016			201.95	4.27e-05			201.95	0.0003193			201.95	-0.0002712			201.95	-0.0001957			201.95	0.0002499			201.95	-0.000301			201.95	-0.0002603			201.95	0.000103
202.95	0.0003014			202.95	-0.0001618			202.95	4.27e-05			202.95	0.0003225			202.95	-0.0002737			202.95	-0.0001977			202.95	0.0002524			202.95	-0.0003037			202.95	-0.0002629			202.95	0.000103
203.95	0.000304			203.95	-0.0001635			203.95	4.27e-05			203.95	0.0003258			203.95	-0.000276			203.95	-0.0001996			203.95	0.0002549			203.95	-0.0003062			203.95	-0.0002654			203.95	0.0001032
204.95	0.0003067			204.95	-0.0001651			204.95	4.29e-05			204.95	0.0003293			204.95	-0.0002783			204.95	-0.0002013			204.95	0.0002575			204.95	-0.0003086			204.95	-0.0002678			204.95	0.0001033
205.95	0.0003096			205.95	-0.0001665			205.95	4.32e-05			205.95	0.000333			205.95	-0.0002804			205.95	-0.0002029			205.95	0.0002602			205.95	-0.0003109			205.95	-0.0002701			205.95	0.0001035
206.95	0.0003126			206.95	-0.0001679			206.95	4.36e-05			206.95	0.0003368			206.95	-0.0002825			206.95	-0.0002045			206.95	0.0002629			206.95	-0.0003131			206.95	-0.0002723			206.95	0.0001038
207.95	0.0003158			207.95	-0.0001692			207.95	4.42e-05			207.95	0.0003407			207.95	-0.0002844			207.95	-0.0002059			207.95	0.0002657			207.95	-0.0003152			207.95	-0.0002744			207.95	0.0001041
208.95	0.0003192			208.95	-0.0001703			208.95	4.49e-05			208.95	0.0003448			208.95	-0.0002862			208.95	-0.0002072			208.95	0.0002686			208.95	-0.0003173			208.95	-0.0002764			208.95	0.0001044
209.95	0.0003228			209.95	-0.0001714			209.95	4.57e-05			209.95	0.0003491			209.95	-0.000288			209.95	-0.0002084			209.95	0.0002715			209.95	-0.0003192			209.95	-0.0002784			209.95	0.0001048
210.95	0.0003265			210.95	-0.0001723			210.95	4.67e-05			210.95	0.0003536			210.95	-0.0002896			210.95	-0.0002095			210.95	0.0002745			210.95	-0.000321			210.95	-0.0002802			210.95	0.0001052
211.95	0.0003304			211.95	-0.0001731			211.95	4.78e-05			211.95	0.0003581			211.95	-0.0002912			211.95	-0.0002104			211.95	0.0002775			211.95	-0.0003227			211.95	-0.0002819			211.95	0.0001057
212.95	0.0003345			212.95	-0.0001738			212.95	4.9e-05			212.95	0.0003629			212.95	-0.0002926			212.95	-0.0002113			212.95	0.0002807			212.95	-0.0003244			212.95	-0.0002836			212.95	0.0001062
213.95	0.0003387			213.95	-0.0001745			213.95	5.03e-05			213.95	0.0003678			213.95	-0.000294			213.95	-0.000212			213.95	0.0002838			213.95	-0.0003259			213.95	-0.0002852			213.95	0.0001068
214.95	0.0003431			214.95	-0.000175			214.95	5.18e-05			214.95	0.0003728			214.95	-0.0002953			214.95	-0.0002127			214.95	0.0002871			214.95	-0.0003274			214.95	-0.0002866			214.95	0.0001073
215.95	0.0003477			215.95	-0.0001754			215.95	5.34e-05			215.95	0.000378			215.95	-0.0002964			215.95	-0.0002132			215.95	0.0002903			215.95	-0.0003287			215.95	-0.000288			215.95	0.000108
216.95	0.0003525			216.95	-0.0001757			216.95	5.52e-05			216.95	0.0003834			216.95	-0.0002975			216.95	-0.0002136			216.95	0.0002937			216.95	-0.00033			216.95	-0.0002893			216.95	0.0001086
217.95	0.0003574			217.95	-0.0001759			217.95	5.71e-05			217.95	0.0003889			217.95	-0.0002985			217.95	-0.0002139			217.95	0.0002971			217.95	-0.0003312			217.95	-0.0002905			217.95	0.0001093
218.95	0.0003625			218.95	-0.000176			218.95	5.91e-05			218.95	0.0003946			218.95	-0.0002994			218.95	-0.0002141			218.95	0.0003005			218.95	-0.0003323			218.95	-0.0002916			218.95	0.0001101
219.95	0.0003678			219.95	-0.000176			219.95	6.12e-05			219.95	0.0004004			219.95	-0.0003002			219.95	-0.0002142			219.95	0.000304			219.95	-0.0003333			219.95	-0.0002927			219.95	0.0001109
220.95	0.0003733			220.95	-0.0001759			220.95	6.35e-05			220.95	0.0004064			220.95	-0.0003009			220.95	-0.0002142			220.95	0.0003076			220.95	-0.0003342			220.95	-0.0002936			220.95	0.0001117
221.95	0.000379			221.95	-0.0001757			221.95	6.58e-05			221.95	0.0004126			221.95	-0.0003015			221.95	-0.0002141			221.95	0.0003112			221.95	-0.000335			221.95	-0.0002945			221.95	0.0001126
222.95	0.0003848			222.95	-0.0001754			222.95	6.84e-05			222.95	0.0004189			222.95	-0.000302			222.95	-0.0002139			222.95	0.0003149			222.95	-0.0003358			222.95	-0.0002953			222.95	0.0001134
223.95	0.0003908			223.95	-0.000175			223.95	7.1e-05			223.95	0.0004253			223.95	-0.0003024			223.95	-0.0002136			223.95	0.0003186			223.95	-0.0003364			223.95	-0.0002959			223.95	0.0001144
224.95	0.000397			224.95	-0.0001745			224.95	7.38e-05			224.95	0.0004319			224.95	-0.0003028			224.95	-0.0002132			224.95	0.0003223			224.95	-0.000337			224.95	-0.0002965			224.95	0.0001153
225.95	0.0004034			225.95	-0.0001739			225.95	7.66e-05			225.95	0.0004387			225.95	-0.0003031			225.95	-0.0002126			225.95	0.0003261			225.95	-0.0003375			225.95	-0.0002971			225.95	0.0001163
226.95	0.00041			226.95	-0.0001732			226.95	7.97e-05			226.95	0.0004456			226.95	-0.0003032			226.95	-0.000212			226.95	0.00033			226.95	-0.0003379			226.95	-0.0002975			226.95	0.0001174
227.95	0.0004167			227.95	-0.0001725			227.95	8.28e-05			227.95	0.0004527			227.95	-0.0003033			227.95	-0.0002113			227.95	0.0003339			227.95	-0.0003382			227.95	-0.0002979			227.95	0.0001184
228.95	0.0004236			228.95	-0.0001716			228.95	8.61e-05			228.95	0.00046			228.95	-0.0003033			228.95	-0.0002105			228.95	0.0003378			228.95	-0.0003384			228.95	-0.0002981			228.95	0.0001195
229.95	0.0004308			229.95	-0.0001706			229.95	8.94e-05			229.95	0.0004674			229.95	-0.0003033			229.95	-0.0002096			229.95	0.0003418			229.95	-0.0003386			229.95	-0.0002983			229.95	0.0001207
230.95	0.0004381			230.95	-0.0001696			230.95	9.29e-05			230.95	0.0004749			230.95	-0.0003031			230.95	-0.0002085			230.95	0.0003458			230.95	-0.0003387			230.95	-0.0002984			230.95	0.0001219
231.95	0.0004456			231.95	-0.0001684			231.95	9.66e-05			231.95	0.0004826			231.95	-0.0003029			231.95	-0.0002074			231.95	0.0003499			231.95	-0.0003387			231.95	-0.0002985			231.95	0.0001231
232.95	0.0004533			232.95	-0.0001672			232.95	0.0001003			232.95	0.0004905			232.95	-0.0003026			232.95	-0.0002062			232.95	0.000354			232.95	-0.0003386			232.95	-0.0002984			232.95	0.0001243
233.95	0.0004612			233.95	-0.0001659			233.95	0.0001042			233.95	0.0004985			233.95	-0.0003022			233.95	-0.0002049			233.95	0.0003582			233.95	-0.0003385			233.95	-0.0002983			233.95	0.0001256
234.95	0.0004692			234.95	-0.0001645			234.95	0.0001081			234.95	0.0005068			234.95	-0.0003017			234.95	-0.0002035			234.95	0.0003624			234.95	-0.0003382			234.95	-0.0002981			234.95	0.0001269
235.95	0.0004775			235.95	-0.000163			235.95	0.0001122			235.95	0.0005151			235.95	-0.0003012			235.95	-0.000202			235.95	0.0003666			235.95	-0.0003379			235.95	-0.0002979			235.95	0.0001282
236.95	0.000486			236.95	-0.0001614			236.95	0.0001165			236.95	0.0005237			236.95	-0.0003006			236.95	-0.0002004			236.95	0.0003709			236.95	-0.0003376			236.95	-0.0002975			236.95	0.0001296
237.95	0.0004948			237.95	-0.0001598			237.95	0.0001208			237.95	0.0005324			237.95	-0.0002999			237.95	-0.0001988			237.95	0.0003752			237.95	-0.0003371			237.95	-0.0002971			237.95	0.0001309
238.95	0.0005037			238.95	-0.000158			238.95	0.0001252			238.95	0.0005412			238.95	-0.0002991			238.95	-0.000197			238.95	0.0003796			238.95	-0.0003366			238.95	-0.0002966			238.95	0.0001324
239.95	0.0005128			239.95	-0.0001562			239.95	0.0001298			239.95	0.0005503			239.95	-0.0002983			239.95	-0.0001952			239.95	0.000384			239.95	-0.000336			239.95	-0.000296			239.95	0.0001338
240.95	0.0005222			240.95	-0.0001543			240.95	0.0001345			240.95	0.0005595			240.95	-0.0002974			240.95	-0.0001932			240.95	0.0003884			240.95	-0.0003354			240.95	-0.0002954			240.95	0.0001353
241.95	0.0005318			241.95	-0.0001523			241.95	0.0001393			241.95	0.0005689			241.95	-0.0002964			241.95	-0.0001912			241.95	0.0003929			241.95	-0.0003347			241.95	-0.0002947			241.95	0.0001368
242.95	0.0005416			242.95	-0.0001502			242.95	0.0001442			242.95	0.0005785			242.95	-0.0002954			242.95	-0.0001891			242.95	0.0003974			242.95	-0.0003339			242.95	-0.0002939			242.95	0.0001384
243.95	0.0005516			243.95	-0.0001481			243.95	0.0001492			243.95	0.0005883			243.95	-0.0002943			243.95	-0.0001869			243.95	0.000402			243.95	-0.000333			243.95	-0.0002931			243.95	0.0001399
244.95	0.0005619			244.95	-0.0001458			244.95	0.0001543			244.95	0.0005983			244.95	-0.0002931			244.95	-0.0001846			244.95	0.0004066			244.95	-0.0003321			244.95	-0.0002922			244.95	0.0001415
245.95	0.0005725			245.95	-0.0001435			245.95	0.0001596			245.95	0.0006085			245.95	-0.0002918			245.95	-0.0001823			245.95	0.0004112			245.95	-0.0003311			245.95	-0.0002912			245.95	0.0001432
246.95	0.0005833			246.95	-0.0001411			246.95	0.0001649			246.95	0.0006188			246.95	-0.0002905			246.95	-0.0001798			246.95	0.0004159			246.95	-0.0003301			246.95	-0.0002902			246.95	0.0001448
247.95	0.0005944			247.95	-0.0001387			247.95	0.0001704			247.95	0.0006294			247.95	-0.0002891			247.95	-0.0001773			247.95	0.0004206			247.95	-0.000329			247.95	-0.000289			247.95	0.0001465
248.95	0.0006057			248.95	-0.0001362			248.95	0.000176			248.95	0.0006402			248.95	-0.0002877			248.95	-0.0001747			248.95	0.0004253			248.95	-0.0003278			248.95	-0.0002879			248.95	0.0001482
249.95	0.0006174			249.95	-0.0001336			249.95	0.0001816			249.95	0.0006512			249.95	-0.0002862			249.95	-0.000172			249.95	0.0004301			249.95	-0.0003266			249.95	-0.0002866			249.95	0.00015
250.95	0.0006293			250.95	-0.0001309			250.95	0.0001874			250.95	0.0006624			250.95	-0.0002846			250.95	-0.0001692			250.95	0.000435			250.95	-0.0003253			250.95	-0.0002853			250.95	0.0001517
251.95	0.0006415			251.95	-0.0001281			251.95	0.0001933			251.95	0.0006738			251.95	-0.000283			251.95	-0.0001664			251.95	0.0004398			251.95	-0.0003239			251.95	-0.000284			251.95	0.0001535
252.95	0.0006541			252.95	-0.0001253			252.95	0.0001993			252.95	0.0006855			252.95	-0.0002813			252.95	-0.0001635			252.95	0.0004447			252.95	-0.0003225			252.95	-0.0002826			252.95	0.0001553
253.95	0.000667			253.95	-0.0001224			253.95	0.0002054			253.95	0.0006974			253.95	-0.0002796			253.95	-0.0001605			253.95	0.0004497			253.95	-0.000321			253.95	-0.0002811			253.95	0.0001572
254.95	0.0006802			254.95	-0.0001195			254.95	0.0002117			254.95	0.0007095			254.95	-0.0002777			254.95	-0.0001574			254.95	0.0004547			254.95	-0.0003195			254.95	-0.0002795			254.95	0.0001591
255.95	0.0006937			255.95	-0.0001165			255.95	0.000218			255.95	0.0007219			255.95	-0.0002759			255.95	-0.0001543			255.95	0.0004597			255.95	-0.0003179			255.95	-0.0002779			255.95	0.000161
256.95	0.0007076			256.95	-0.0001134			256.95	0.0002244			256.95	0.0007346			256.95	-0.000274			256.95	-0.0001511			256.95	0.0004648			256.95	-0.0003163			256.95	-0.0002763			256.95	0.0001629
257.95	0.0007218			257.95	-0.0001102			257.95	0.000231			257.95	0.0007475			257.95	-0.000272			257.95	-0.0001478			257.95	0.0004699			257.95	-0.0003146			257.95	-0.0002746			257.95	0.0001649
258.95	0.0007365			258.95	-0.000107			258.95	0.0002376			258.95	0.0007607			258.95	-0.00027			258.95	-0.0001444			258.95	0.0004751			258.95	-0.0003129			258.95	-0.0002728			258.95	0.0001669
259.95	0.0007515			259.95	-0.0001037			259.95	0.0002444			259.95	0.0007741			259.95	-0.0002679			259.95	-0.000141			259.95	0.0004803			259.95	-0.0003111			259.95	-0.000271			259.95	0.0001689
260.95	0.0007669			260.95	-0.0001004			260.95	0.0002512			260.95	0.0007879			260.95	-0.0002657			260.95	-0.0001375			260.95	0.0004855			260.95	-0.0003093			260.95	-0.0002691			260.95	0.000171
261.95	0.0007827			261.95	-9.7e-05			261.95	0.0002582			261.95	0.0008019			261.95	-0.0002636			261.95	-0.000134			261.95	0.0004908			261.95	-0.0003074			261.95	-0.0002672			261.95	0.000173
262.95	0.0007989			262.95	-9.35e-05			262.95	0.0002652			262.95	0.0008162			262.95	-0.0002613			262.95	-0.0001303			262.95	0.0004962			262.95	-0.0003054			262.95	-0.0002652			262.95	0.0001752
263.95	0.0008156			263.95	-9e-05			263.95	0.0002724			263.95	0.0008308			263.95	-0.000259			263.95	-0.0001266			263.95	0.0005016			263.95	-0.0003034			263.95	-0.0002631			263.95	0.0001773
264.95	0.0008327			264.95	-8.64e-05			264.95	0.0002797			264.95	0.0008457			264.95	-0.0002567			264.95	-0.0001229			264.95	0.000507			264.95	-0.0003014			264.95	-0.0002611			264.95	0.0001795
265.95	0.0008502			265.95	-8.28e-05			265.95	0.0002871			265.95	0.000861			265.95	-0.0002543			265.95	-0.0001191			265.95	0.0005125			265.95	-0.0002993			265.95	-0.0002589			265.95	0.0001817
266.95	0.0008682			266.95	-7.91e-05			266.95	0.0002946			266.95	0.0008765			266.95	-0.0002519			266.95	-0.0001152			266.95	0.000518			266.95	-0.0002972			266.95	-0.0002567			266.95	0.0001839
267.95	0.0008867			267.95	-7.53e-05			267.95	0.0003022			267.95	0.0008924			267.95	-0.0002494			267.95	-0.0001112			267.95	0.0005236			267.95	-0.000295			267.95	-0.0002545			267.95	0.0001861
268.95	0.0009057			268.95	-7.15e-05			268.95	0.0003099			268.95	0.0009086			268.95	-0.0002469			268.95	-0.0001072			268.95	0.0005293			268.95	-0.0002928			268.95	-0.0002522			268.95	0.0001884
269.95	0.0009251			269.95	-6.77e-05			269.95	0.0003177			269.95	0.0009252			269.95	-0.0002443			269.95	-0.0001031			269.95	0.000535			269.95	-0.0002906			269.95	-0.0002499			269.95	0.0001907
270.95	0.0009451			270.95	-6.37e-05			270.95	0.0003256			270.95	0.0009421			270.95	-0.0002417			270.95	-9.9e-05			270.95	0.0005407			270.95	-0.0002883			270.95	-0.0002475			270.95	0.0001931
271.95	0.0009657			271.95	-5.98e-05			271.95	0.0003337			271.95	0.0009594			271.95	-0.000239			271.95	-9.48e-05			271.95	0.0005466			271.95	-0.0002859			271.95	-0.0002451			271.95	0.0001954
272.95	0.0009868			272.95	-5.57e-05			272.95	0.0003418			272.95	0.000977			272.95	-0.0002363			272.95	-9.06e-05			272.95	0.0005524			272.95	-0.0002835			272.95	-0.0002426			272.95	0.0001978
273.95	0.0010085			273.95	-5.17e-05			273.95	0.0003501			273.95	0.0009951			273.95	-0.0002336			273.95	-8.63e-05			273.95	0.0005584			273.95	-0.0002811			273.95	-0.0002401			273.95	0.0002003
274.95	0.0010307			274.95	-4.75e-05			274.95	0.0003585			274.95	0.0010135			274.95	-0.0002308			274.95	-8.19e-05			274.95	0.0005644			274.95	-0.0002786			274.95	-0.0002375			274.95	0.0002027
275.95	0.0010536			275.95	-4.34e-05			275.95	0.000367			275.95	0.0010324			275.95	-0.0002279			275.95	-7.75e-05			275.95	0.0005704			275.95	-0.0002761			275.95	-0.0002349			275.95	0.0002052
276.95	0.0010771			276.95	-3.91e-05			276.95	0.0003756			276.95	0.0010516			276.95	-0.0002251			276.95	-7.3e-05			276.95	0.0005765			276.95	-0.0002736			276.95	-0.0002323			276.95	0.0002077
277.95	0.0011013			277.95	-3.49e-05			277.95	0.0003843			277.95	0.0010713			277.95	-0.0002222			277.95	-6.85e-05			277.95	0.0005827			277.95	-0.000271			277.95	-0.0002296			277.95	0.0002103
278.95	0.0011262			278.95	-3.06e-05			278.95	0.0003932			278.95	0.0010915			278.95	-0.0002192			278.95	-6.39e-05			278.95	0.000589			278.95	-0.0002684			278.95	-0.0002269			278.95	0.0002129
279.95	0.0011518			279.95	-2.62e-05			279.95	0.0004022			279.95	0.0011121			279.95	-0.0002162			279.95	-5.93e-05			279.95	0.0005953			279.95	-0.0002658			279.95	-0.0002241			279.95	0.0002155
280.95	0.001178			280.95	-2.18e-05			280.95	0.0004113			280.95	0.0011331			280.95	-0.0002132			280.95	-5.46e-05			280.95	0.0006017			280.95	-0.0002631			280.95	-0.0002213			280.95	0.0002181
281.95	0.0012051			281.95	-1.73e-05			281.95	0.0004206			281.95	0.0011547			281.95	-0.0002102			281.95	-4.99e-05			281.95	0.0006082			281.95	-0.0002604			281.95	-0.0002184			281.95	0.0002208
282.95	0.0012329			282.95	-1.28e-05			282.95	0.0004299			282.95	0.0011768			282.95	-0.0002071			282.95	-4.51e-05			282.95	0.0006147			282.95	-0.0002576			282.95	-0.0002156			282.95	0.0002235
283.95	0.0012615			283.95	-8.3e-06			283.95	0.0004395			283.95	0.0011993			283.95	-0.000204			283.95	-4.03e-05			283.95	0.0006214			283.95	-0.0002548			283.95	-0.0002126			283.95	0.0002263
284.95	0.0012908			284.95	-3.7e-06			284.95	0.0004491			284.95	0.0012224			284.95	-0.0002008			284.95	-3.54e-05			284.95	0.0006281			284.95	-0.000252			284.95	-0.0002097			284.95	0.000229
285.95	0.001321			285.95	9e-07			285.95	0.0004589			285.95	0.001246			285.95	-0.0001976			285.95	-3.05e-05			285.95	0.0006349			285.95	-0.0002492			285.95	-0.0002067			285.95	0.0002318
286.95	0.001352			286.95	5.6e-06			286.95	0.0004689			286.95	0.0012702			286.95	-0.0001944			286.95	-2.55e-05			286.95	0.0006418			286.95	-0.0002463			286.95	-0.0002037			286.95	0.0002347
287.95	0.0013839			287.95	1.03e-05			287.95	0.000479			287.95	0.0012949			287.95	-0.0001911			287.95	-2.05e-05			287.95	0.0006487			287.95	-0.0002434			287.95	-0.0002006			287.95	0.0002376
288.95	0.0014166			288.95	1.51e-05			288.95	0.0004892			288.95	0.0013201			288.95	-0.0001879			288.95	-1.54e-05			288.95	0.0006558			288.95	-0.0002404			288.95	-0.0001975			288.95	0.0002405
289.95	0.0014502			289.95	1.98e-05			289.95	0.0004997			289.95	0.001346			289.95	-0.0001845			289.95	-1.03e-05			289.95	0.000663			289.95	-0.0002375			289.95	-0.0001944			289.95	0.0002434
290.95	0.0014846			290.95	2.47e-05			290.95	0.0005103			290.95	0.0013724			290.95	-0.0001812			290.95	-5.2e-06			290.95	0.0006702			290.95	-0.0002345			290.95	-0.0001912			290.95	0.0002464
291.95	0.0015198			291.95	2.95e-05			291.95	0.000521			291.95	0.0013994			291.95	-0.0001778			291.95	0			291.95	0.0006776			291.95	-0.0002314			291.95	-0.000188			291.95	0.0002494
292.95	0.0015559			292.95	3.44e-05			292.95	0.000532			292.95	0.0014269			292.95	-0.0001744			292.95	5.3e-06			292.95	0.000685			292.95	-0.0002284			292.95	-0.0001848			292.95	0.0002525
293.95	0.0015928			293.95	3.94e-05			293.95	0.0005431			293.95	0.0014551			293.95	-0.000171			293.95	1.05e-05			293.95	0.0006925			293.95	-0.0002253			293.95	-0.0001815			293.95	0.0002556
294.95	0.0016305			294.95	4.43e-05			294.95	0.0005544			294.95	0.0014838			294.95	-0.0001676			294.95	1.59e-05			294.95	0.0007002			294.95	-0.0002222			294.95	-0.0001782			294.95	0.0002587
295.95	0.001669			295.95	4.93e-05			295.95	0.0005659			295.95	0.0015131			295.95	-0.0001641			295.95	2.12e-05			295.95	0.0007079			295.95	-0.0002191			295.95	-0.0001749			295.95	0.0002619
296.95	0.0017082			296.95	5.44e-05			296.95	0.0005776			296.95	0.0015429			296.95	-0.0001606			296.95	2.66e-05			296.95	0.0007158			296.95	-0.000216			296.95	-0.0001715			296.95	0.0002651
297.95	0.0017481			297.95	5.94e-05			297.95	0.0005895			297.95	0.0015733			297.95	-0.0001571			297.95	3.2e-05			297.95	0.0007238			297.95	-0.0002128			297.95	-0.0001682			297.95	0.0002684
298.95	0.0017887			298.95	6.45e-05			298.95	0.0006016			298.95	0.0016042			298.95	-0.0001535			298.95	3.75e-05			298.95	0.0007319			298.95	-0.0002096			298.95	-0.0001648			298.95	0.0002717
299.95	0.0018299			299.95	6.97e-05			299.95	0.000614			299.95	0.0016357			299.95	-0.0001499			299.95	4.3e-05			299.95	0.0007401			299.95	-0.0002064			299.95	-0.0001613			299.95	0.000275
300.95	0.0018716			300.95	7.48e-05			300.95	0.0006265			300.95	0.0016677			300.95	-0.0001463			300.95	4.86e-05			300.95	0.0007484			300.95	-0.0002031			300.95	-0.0001579			300.95	0.0002784
301.95	0.0019139			301.95	8e-05			301.95	0.0006393			301.95	0.0017001			301.95	-0.0001427			301.95	5.42e-05			301.95	0.0007569			301.95	-0.0001999			301.95	-0.0001544			301.95	0.0002818
302.95	0.0019566			302.95	8.53e-05			302.95	0.0006523			302.95	0.001733			302.95	-0.0001391			302.95	5.98e-05			302.95	0.0007655			302.95	-0.0001966			302.95	-0.0001509			302.95	0.0002852
303.95	0.0019998			303.95	9.05e-05			303.95	0.0006656			303.95	0.0017663			303.95	-0.0001354			303.95	6.54e-05			303.95	0.0007742			303.95	-0.0001933			303.95	-0.0001473			303.95	0.0002888
304.95	0.0020432			304.95	9.58e-05			304.95	0.0006791			304.95	0.0018			304.95	-0.0001317			304.95	7.11e-05			304.95	0.000783			304.95	-0.00019			304.95	-0.0001438			304.95	0.0002923
305.95	0.0020869			305.95	0.0001011			305.95	0.0006929			305.95	0.0018341			305.95	-0.000128			305.95	7.69e-05			305.95	0.000792			305.95	-0.0001867			305.95	-0.0001402			305.95	0.0002959
306.95	0.0021309			306.95	0.0001065			306.95	0.0007069			306.95	0.0018685			306.95	-0.0001243			306.95	8.26e-05			306.95	0.0008011			306.95	-0.0001833			306.95	-0.0001366			306.95	0.0002996
307.95	0.0021749			307.95	0.0001118			307.95	0.0007212			307.95	0.0019032			307.95	-0.0001206			307.95	8.84e-05			307.95	0.0008104			307.95	-0.0001799			307.95	-0.000133			307.95	0.0003032
308.95	0.0022191			308.95	0.0001172			308.95	0.0007357			308.95	0.0019382			308.95	-0.0001168			308.95	9.42e-05			308.95	0.0008198			308.95	-0.0001765			308.95	-0.0001293			308.95	0.000307
309.95	0.0022633			309.95	0.0001226			309.95	0.0007506			309.95	0.0019734			309.95	-0.0001131			309.95	0.0001001			309.95	0.0008294			309.95	-0.0001731			309.95	-0.0001256			309.95	0.0003108
310.95	0.0023074			310.95	0.0001281			310.95	0.0007657			310.95	0.0020088			310.95	-0.0001093			310.95	0.000106			310.95	0.0008391			310.95	-0.0001697			310.95	-0.000122			310.95	0.0003146
311.95	0.0023515			311.95	0.0001336			311.95	0.0007811			311.95	0.0020443			311.95	-0.0001055			311.95	0.0001119			311.95	0.0008489			311.95	-0.0001663			311.95	-0.0001182			311.95	0.0003185
312.95	0.0023954			312.95	0.000139			312.95	0.0007969			312.95	0.0020799			312.95	-0.0001016			312.95	0.0001178			312.95	0.000859			312.95	-0.0001629			312.95	-0.0001145			312.95	0.0003225
313.95	0.0024392			313.95	0.0001446			313.95	0.0008129			313.95	0.0021156			313.95	-9.78e-05			313.95	0.0001238			313.95	0.0008691			313.95	-0.0001594			313.95	-0.0001108			313.95	0.0003265
314.95	0.0024827			314.95	0.0001501			314.95	0.0008293			314.95	0.0021513			314.95	-9.4e-05			314.95	0.0001298			314.95	0.0008795			314.95	-0.0001559			314.95	-0.000107			314.95	0.0003305
315.95	0.002526			315.95	0.0001557			315.95	0.000846			315.95	0.002187			315.95	-9.01e-05			315.95	0.0001359			315.95	0.00089			315.95	-0.0001524			315.95	-0.0001032			315.95	0.0003347
316.95	0.0025691			316.95	0.0001613			316.95	0.000863			316.95	0.0022227			316.95	-8.62e-05			316.95	0.000142			316.95	0.0009007			316.95	-0.0001489			316.95	-9.94e-05			316.95	0.0003388
317.95	0.0026118			317.95	0.0001669			317.95	0.0008804			317.95	0.0022583			317.95	-8.23e-05			317.95	0.0001481			317.95	0.0009115			317.95	-0.0001454			317.95	-9.56e-05			317.95	0.0003431
318.95	0.0026542			318.95	0.0001725			318.95	0.0008981			318.95	0.0022938			318.95	-7.84e-05			318.95	0.0001542			318.95	0.0009225			318.95	-0.0001419			318.95	-9.17e-05			318.95	0.0003473
319.95	0.0026962			319.95	0.0001782			319.95	0.0009162			319.95	0.0023291			319.95	-7.45e-05			319.95	0.0001604			319.95	0.0009337			319.95	-0.0001384			319.95	-8.79e-05			319.95	0.0003517
320.95	0.0027379			320.95	0.0001838			320.95	0.0009347			320.95	0.0023643			320.95	-7.06e-05			320.95	0.0001666			320.95	0.0009451			320.95	-0.0001349			320.95	-8.4e-05			320.95	0.0003561
321.95	0.0027793			321.95	0.0001895			321.95	0.0009535			321.95	0.0023994			321.95	-6.67e-05			321.95	0.0001728			321.95	0.0009566			321.95	-0.0001313			321.95	-8.01e-05			321.95	0.0003606
322.95	0.0028203			322.95	0.0001952			322.95	0.0009728			322.95	0.0024342			322.95	-6.27e-05			322.95	0.0001791			322.95	0.0009683			322.95	-0.0001278			322.95	-7.62e-05			322.95	0.0003651
323.95	0.0028608			323.95	0.000201			323.95	0.0009924			323.95	0.0024688			323.95	-5.88e-05			323.95	0.0001853			323.95	0.0009802			323.95	-0.0001242			323.95	-7.23e-05			323.95	0.0003697
324.95	0.002901			324.95	0.0002067			324.95	0.0010125			324.95	0.0025031			324.95	-5.48e-05			324.95	0.0001917			324.95	0.0009923			324.95	-0.0001206			324.95	-6.84e-05			324.95	0.0003744
325.95	0.0029408			325.95	0.0002125			325.95	0.0010329			325.95	0.0025373			325.95	-5.09e-05			325.95	0.000198			325.95	0.0010045			325.95	-0.000117			325.95	-6.44e-05			325.95	0.0003791
326.95	0.0029802			326.95	0.0002183			326.95	0.0010538			326.95	0.0025711			326.95	-4.69e-05			326.95	0.0002044			326.95	0.001017			326.95	-0.0001134			326.95	-6.05e-05			326.95	0.0003839
327.95	0.0030191			327.95	0.0002241			327.95	0.0010752			327.95	0.0026047			327.95	-4.29e-05			327.95	0.0002108			327.95	0.0010296			327.95	-0.0001099			327.95	-5.65e-05			327.95	0.0003888
328.95	0.0030575			328.95	0.00023			328.95	0.0010969			328.95	0.0026381			328.95	-3.89e-05			328.95	0.0002172			328.95	0.0010423			328.95	-0.0001063			328.95	-5.25e-05			328.95	0.0003938
329.95	0.0030955			329.95	0.0002358			329.95	0.0011192			329.95	0.0026712			329.95	-3.49e-05			329.95	0.0002237			329.95	0.0010553			329.95	-0.0001027			329.95	-4.85e-05			329.95	0.0003988
330.95	0.003133			330.95	0.0002417			330.95	0.0011418			330.95	0.002704			330.95	-3.09e-05			330.95	0.0002302			330.95	0.0010684			330.95	-9.9e-05			330.95	-4.45e-05			330.95	0.0004039
331.95	0.00317			331.95	0.0002476			331.95	0.0011649			331.95	0.0027365			331.95	-2.69e-05			331.95	0.0002368			331.95	0.0010817			331.95	-9.54e-05			331.95	-4.05e-05			331.95	0.000409
332.95	0.0032063			332.95	0.0002535			332.95	0.0011885			332.95	0.0027688			332.95	-2.29e-05			332.95	0.0002433			332.95	0.0010951			332.95	-9.18e-05			332.95	-3.65e-05			332.95	0.0004143
333.95	0.0032421			333.95	0.0002594			333.95	0.0012125			333.95	0.0028007			333.95	-1.89e-05			333.95	0.0002499			333.95	0.0011087			333.95	-8.82e-05			333.95	-3.25e-05			333.95	0.0004196
334.95	0.0032773			334.95	0.0002654			334.95	0.0012369			334.95	0.0028324			334.95	-1.49e-05			334.95	0.0002566			334.95	0.0011225			334.95	-8.46e-05			334.95	-2.84e-05			334.95	0.000425
335.95	0.0033118			335.95	0.0002713			335.95	0.0012618			335.95	0.0028638			335.95	-1.09e-05			335.95	0.0002633			335.95	0.0011364			335.95	-8.09e-05			335.95	-2.44e-05			335.95	0.0004304
336.95	0.0033457			336.95	0.0002773			336.95	0.0012871			336.95	0.0028949			336.95	-6.8e-06			336.95	0.00027			336.95	0.0011505			336.95	-7.73e-05			336.95	-2.03e-05			336.95	0.000436
337.95	0.0033788			337.95	0.0002833			337.95	0.0013128			337.95	0.0029257			337.95	-2.8e-06			337.95	0.0002767			337.95	0.0011646			337.95	-7.37e-05			337.95	-1.62e-05			337.95	0.0004416
338.95	0.0034112			338.95	0.0002894			338.95	0.001339			338.95	0.0029561			338.95	1.2e-06			338.95	0.0002835			338.95	0.001179			338.95	-7e-05			338.95	-1.21e-05			338.95	0.0004473
339.95	0.0034428			339.95	0.0002954			339.95	0.0013655			339.95	0.0029862			339.95	5.3e-06			339.95	0.0002903			339.95	0.0011934			339.95	-6.64e-05			339.95	-8e-06			339.95	0.0004531
340.95	0.0034737			340.95	0.0003015			340.95	0.0013924			340.95	0.0030159			340.95	9.3e-06			340.95	0.0002972			340.95	0.0012079			340.95	-6.28e-05			340.95	-3.9e-06			340.95	0.000459
341.95	0.0035038			341.95	0.0003076			341.95	0.0014197			341.95	0.0030453			341.95	1.33e-05			341.95	0.0003041			341.95	0.0012226			341.95	-5.91e-05			341.95	2e-07			341.95	0.0004649
342.95	0.0035331			342.95	0.0003137			342.95	0.0014473			342.95	0.0030742			342.95	1.74e-05			342.95	0.000311			342.95	0.0012373			342.95	-5.55e-05			342.95	4.3e-06			342.95	0.0004709
343.95	0.0035616			343.95	0.0003198			343.95	0.0014753			343.95	0.0031026			343.95	2.14e-05			343.95	0.000318			343.95	0.0012522			343.95	-5.19e-05			343.95	8.4e-06			343.95	0.0004771
344.95	0.0035893			344.95	0.000326			344.95	0.0015035			344.95	0.0031306			344.95	2.54e-05			344.95	0.0003251			344.95	0.0012671			344.95	-4.82e-05			344.95	1.25e-05			344.95	0.0004833
345.95	0.0036162			345.95	0.0003322			345.95	0.001532			345.95	0.0031582			345.95	2.95e-05			345.95	0.0003322			345.95	0.0012821			345.95	-4.46e-05			345.95	1.67e-05			345.95	0.0004895
346.95	0.0036423			346.95	0.0003384			346.95	0.0015608			346.95	0.0031852			346.95	3.35e-05			346.95	0.0003393			346.95	0.0012971			346.95	-4.1e-05			346.95	2.08e-05			346.95	0.0004959
347.95	0.0036677			347.95	0.0003446			347.95	0.0015898			347.95	0.0032116			347.95	3.75e-05			347.95	0.0003465			347.95	0.0013122			347.95	-3.73e-05			347.95	2.5e-05			347.95	0.0005024
348.95	0.0036923			348.95	0.0003509			348.95	0.001619			348.95	0.0032376			348.95	4.16e-05			348.95	0.0003537			348.95	0.0013274			348.95	-3.37e-05			348.95	2.91e-05			348.95	0.0005089
349.95	0.0037161			349.95	0.0003571			349.95	0.0016483			349.95	0.0032629			349.95	4.56e-05			349.95	0.000361			349.95	0.0013425			349.95	-3.01e-05			349.95	3.33e-05			349.95	0.0005155
350.95	0.0037392			350.95	0.0003634			350.95	0.0016778			350.95	0.0032877			350.95	4.96e-05			350.95	0.0003683			350.95	0.0013577			350.95	-2.64e-05			350.95	3.75e-05			350.95	0.0005222
351.95	0.0037616			351.95	0.0003698			351.95	0.0017073			351.95	0.0033119			351.95	5.37e-05			351.95	0.0003757			351.95	0.0013729			351.95	-2.28e-05			351.95	4.16e-05			351.95	0.000529
352.95	0.0037834			352.95	0.0003761			352.95	0.001737			352.95	0.0033356			352.95	5.77e-05			352.95	0.0003832			352.95	0.0013881			352.95	-1.92e-05			352.95	4.58e-05			352.95	0.0005359
353.95	0.0038044			353.95	0.0003825			353.95	0.0017666			353.95	0.0033586			353.95	6.17e-05			353.95	0.0003907			353.95	0.0014033			353.95	-1.56e-05			353.95	5e-05			353.95	0.0005428
354.95	0.0038248			354.95	0.0003889			354.95	0.0017963			354.95	0.0033811			354.95	6.57e-05			354.95	0.0003983			354.95	0.0014184			354.95	-1.2e-05			354.95	5.42e-05			354.95	0.0005499
355.95	0.0038445			355.95	0.0003954			355.95	0.0018259			355.95	0.0034029			355.95	6.97e-05			355.95	0.0004059			355.95	0.0014335			355.95	-8.4e-06			355.95	5.84e-05			355.95	0.000557
356.95	0.0038637			356.95	0.0004019			356.95	0.0018555			356.95	0.0034243			356.95	7.37e-05			356.95	0.0004137			356.95	0.0014486			356.95	-4.8e-06			356.95	6.26e-05			356.95	0.0005642
357.95	0.0038822			357.95	0.0004084			357.95	0.001885			357.95	0.003445			357.95	7.77e-05			357.95	0.0004214			357.95	0.0014636			357.95	-1.2e-06			357.95	6.69e-05			357.95	0.0005714
358.95	0.0039002			358.95	0.0004149			358.95	0.0019144			358.95	0.0034653			358.95	8.18e-05			358.95	0.0004293			358.95	0.0014785			358.95	2.4e-06			358.95	7.11e-05			358.95	0.0005788
359.95	0.0039176			359.95	0.0004215			359.95	0.0019436			359.95	0.003485			359.95	8.57e-05			359.95	0.0004372			359.95	0.0014933			359.95	6e-06			359.95	7.53e-05			359.95	0.0005862
360.95	0.0039346			360.95	0.0004281			360.95	0.0019727			360.95	0.0035042			360.95	8.97e-05			360.95	0.0004452			360.95	0.0015081			360.95	9.6e-06			360.95	7.96e-05			360.95	0.0005937
361.95	0.003951			361.95	0.0004348			361.95	0.0020015			361.95	0.0035229			361.95	9.37e-05			361.95	0.0004533			361.95	0.0015227			361.95	1.31e-05			361.95	8.38e-05			361.95	0.0006013
362.95	0.0039669			362.95	0.0004415			362.95	0.0020302			362.95	0.0035412			362.95	9.77e-05			362.95	0.0004615			362.95	0.0015373			362.95	1.67e-05			362.95	8.81e-05			362.95	0.0006089
363.95	0.0039824			363.95	0.0004482			363.95	0.0020586			363.95	0.003559			363.95	0.0001017			363.95	0.0004697			363.95	0.0015517			363.95	2.03e-05			363.95	9.24e-05			363.95	0.0006166
364.95	0.0039975			364.95	0.000455			364.95	0.0020868			364.95	0.0035764			364.95	0.0001057			364.95	0.0004781			364.95	0.001566			364.95	2.38e-05			364.95	9.66e-05			364.95	0.0006243
365.95	0.0040122			365.95	0.0004618			365.95	0.0021147			365.95	0.0035934			365.95	0.0001096			365.95	0.0004865			365.95	0.0015802			365.95	2.74e-05			365.95	0.0001009			365.95	0.0006322
366.95	0.0040264			366.95	0.0004687			366.95	0.0021423			366.95	0.00361			366.95	0.0001136			366.95	0.000495			366.95	0.0015942			366.95	3.09e-05			366.95	0.0001052			366.95	0.00064
367.95	0.0040403			367.95	0.0004756			367.95	0.0021696			367.95	0.0036262			367.95	0.0001175			367.95	0.0005036			367.95	0.0016081			367.95	3.44e-05			367.95	0.0001095			367.95	0.0006479
368.95	0.0040539			368.95	0.0004826			368.95	0.0021967			368.95	0.0036421			368.95	0.0001215			368.95	0.0005123			368.95	0.0016219			368.95	3.79e-05			368.95	0.0001138			368.95	0.0006559
369.95	0.004067			369.95	0.0004896			369.95	0.0022235			369.95	0.0036577			369.95	0.0001254			369.95	0.0005211			369.95	0.0016355			369.95	4.15e-05			369.95	0.0001181			369.95	0.0006639
370.95	0.0040799			370.95	0.0004967			370.95	0.00225			370.95	0.003673			370.95	0.0001294			370.95	0.00053			370.95	0.001649			370.95	4.5e-05			370.95	0.0001225			370.95	0.000672
371.95	0.0040924			371.95	0.0005038			371.95	0.0022762			371.95	0.003688			371.95	0.0001333			371.95	0.000539			371.95	0.0016623			371.95	4.85e-05			371.95	0.0001268			371.95	0.0006801
372.95	0.0041046			372.95	0.000511			372.95	0.0023022			372.95	0.0037027			372.95	0.0001372			372.95	0.0005481			372.95	0.0016755			372.95	5.2e-05			372.95	0.0001312			372.95	0.0006882
373.95	0.0041165			373.95	0.0005182			373.95	0.0023279			373.95	0.0037172			373.95	0.0001412			373.95	0.0005573			373.95	0.0016886			373.95	5.54e-05			373.95	0.0001355			373.95	0.0006964
374.95	0.0041281			374.95	0.0005255			374.95	0.0023533			374.95	0.0037314			374.95	0.0001451			374.95	0.0005666			374.95	0.0017015			374.95	5.89e-05			374.95	0.0001399			374.95	0.0007046
375.95	0.0041395			375.95	0.0005329			375.95	0.0023785			375.95	0.0037455			375.95	0.000149			375.95	0.0005761			375.95	0.0017142			375.95	6.24e-05			375.95	0.0001443			375.95	0.0007128
376.95	0.0041506			376.95	0.0005403			376.95	0.0024035			376.95	0.0037593			376.95	0.0001529			376.95	0.0005856			376.95	0.0017268			376.95	6.58e-05			376.95	0.0001487			376.95	0.000721
377.95	0.0041615			377.95	0.0005478			377.95	0.0024282			377.95	0.0037729			377.95	0.0001568			377.95	0.0005953			377.95	0.0017393			377.95	6.93e-05			377.95	0.0001531			377.95	0.0007292
378.95	0.0041723			378.95	0.0005554			378.95	0.0024528			378.95	0.0037864			378.95	0.0001606			378.95	0.0006051			378.95	0.0017517			378.95	7.27e-05			378.95	0.0001576			378.95	0.0007374
379.95	0.004183			379.95	0.000563			379.95	0.0024771			379.95	0.0037997			379.95	0.0001645			379.95	0.000615			379.95	0.001764			379.95	7.61e-05			379.95	0.000162			379.95	0.0007456
380.95	0.0041936			380.95	0.0005707			380.95	0.0025012			380.95	0.0038128			380.95	0.0001684			380.95	0.000625			380.95	0.0017761			380.95	7.96e-05			380.95	0.0001665			380.95	0.0007538
381.95	0.0042041			381.95	0.0005785			381.95	0.0025252			381.95	0.0038258			381.95	0.0001723			381.95	0.0006352			381.95	0.0017881			381.95	8.3e-05			381.95	0.000171			381.95	0.000762
382.95	0.0042147			382.95	0.0005864			382.95	0.0025489			382.95	0.0038386			382.95	0.0001761			382.95	0.0006455			382.95	0.0018001			382.95	8.64e-05			382.95	0.0001755			382.95	0.0007702
383.95	0.0042254			383.95	0.0005943			383.95	0.0025724			383.95	0.0038512			383.95	0.00018			383.95	0.0006559			383.95	0.0018119			383.95	8.98e-05			383.95	0.00018			383.95	0.0007784
384.95	0.0042361			384.95	0.0006023			384.95	0.0025958			384.95	0.0038638			384.95	0.0001838			384.95	0.0006664			384.95	0.0018236			384.95	9.31e-05			384.95	0.0001846			384.95	0.0007865
385.95	0.0042468			385.95	0.0006105			385.95	0.0026189			385.95	0.0038762			385.95	0.0001876			385.95	0.0006771			385.95	0.0018352			385.95	9.65e-05			385.95	0.0001892			385.95	0.0007946
386.95	0.0042576			386.95	0.0006186			386.95	0.0026418			386.95	0.0038884			386.95	0.0001915			386.95	0.0006879			386.95	0.0018468			386.95	9.99e-05			386.95	0.0001937			386.95	0.0008027
387.95	0.0042683			387.95	0.0006269			387.95	0.0026645			387.95	0.0039006			387.95	0.0001953			387.95	0.0006989			387.95	0.0018583			387.95	0.0001032			387.95	0.0001984			387.95	0.0008107
388.95	0.0042788			388.95	0.0006353			388.95	0.0026869			388.95	0.0039127			388.95	0.0001991			388.95	0.00071			388.95	0.0018697			388.95	0.0001065			388.95	0.000203			388.95	0.0008186
389.95	0.0042889			389.95	0.0006438			389.95	0.0027091			389.95	0.0039247			389.95	0.0002029			389.95	0.0007213			389.95	0.001881			389.95	0.0001099			389.95	0.0002077			389.95	0.0008265
390.95	0.0042983			390.95	0.0006523			390.95	0.002731			390.95	0.0039367			390.95	0.0002067			390.95	0.0007327			390.95	0.0018923			390.95	0.0001132			390.95	0.0002124			390.95	0.0008344
391.95	0.0043066			391.95	0.000661			391.95	0.0027526			391.95	0.0039488			391.95	0.0002105			391.95	0.0007442			391.95	0.0019035			391.95	0.0001165			391.95	0.0002171			391.95	0.0008422
392.95	0.0043135			392.95	0.0006697			392.95	0.0027739			392.95	0.0039609			392.95	0.0002143			392.95	0.0007559			392.95	0.0019146			392.95	0.0001198			392.95	0.0002219			392.95	0.0008499
393.95	0.0043184			393.95	0.0006786			393.95	0.0027949			393.95	0.0039732			393.95	0.0002181			393.95	0.0007678			393.95	0.0019258			393.95	0.0001231			393.95	0.0002266			393.95	0.0008576
394.95	0.0043209			394.95	0.0006875			394.95	0.0028156			394.95	0.0039858			394.95	0.0002219			394.95	0.0007798			394.95	0.0019369			394.95	0.0001264			394.95	0.0002315			394.95	0.0008652
395.95	0.0043204			395.95	0.0006966			395.95	0.0028359			395.95	0.0039987			395.95	0.0002256			395.95	0.000792			395.95	0.0019479			395.95	0.0001296			395.95	0.0002363			395.95	0.0008727
396.95	0.0043163			396.95	0.0007057			396.95	0.0028558			396.95	0.0040119			396.95	0.0002294			396.95	0.0008043			396.95	0.001959			396.95	0.0001329			396.95	0.0002412			396.95	0.0008801
397.95	0.004308			397.95	0.000715			397.95	0.0028753			397.95	0.0040257			397.95	0.0002332			397.95	0.0008168			397.95	0.0019701			397.95	0.0001361			397.95	0.0002461			397.95	0.0008875
398.95	0.0042949			398.95	0.0007244			398.95	0.0028945			398.95	0.0040401			398.95	0.0002369			398.95	0.0008295			398.95	0.0019811			398.95	0.0001394			398.95	0.0002511			398.95	0.0008948
399.95	0.0042766			399.95	0.0007339			399.95	0.0029133			399.95	0.0040551			399.95	0.0002407			399.95	0.0008423			399.95	0.0019922			399.95	0.0001426			399.95	0.0002561			399.95	0.000902
400.95	0.0042527			400.95	0.0007435			400.95	0.0029317			400.95	0.0040708			400.95	0.0002444			400.95	0.0008553			400.95	0.0020033			400.95	0.0001458			400.95	0.0002611			400.95	0.0009091
401.95	0.0042226			401.95	0.0007532			401.95	0.0029497			401.95	0.0040872			401.95	0.0002482			401.95	0.0008685			401.95	0.0020144			401.95	0.000149			401.95	0.0002662			401.95	0.0009161
402.95	0.0041861			402.95	0.000763			402.95	0.0029674			402.95	0.0041042			402.95	0.0002519			402.95	0.0008818			402.95	0.0020255			402.95	0.0001522			402.95	0.0002713			402.95	0.0009231
403.95	0.0041431			403.95	0.000773			403.95	0.0029847			403.95	0.0041217			403.95	0.0002557			403.95	0.0008953			403.95	0.0020367			403.95	0.0001554			403.95	0.0002765			403.95	0.00093
404.95	0.0040933			404.95	0.000783			404.95	0.0030017			404.95	0.0041396			404.95	0.0002594			404.95	0.0009089			404.95	0.0020479			404.95	0.0001586			404.95	0.0002817			404.95	0.0009368
405.95	0.0040368			405.95	0.0007932			405.95	0.0030183			405.95	0.0041575			405.95	0.0002631			405.95	0.0009227			405.95	0.0020591			405.95	0.0001617			405.95	0.0002869			405.95	0.0009436
406.95	0.0039736			406.95	0.0008035			406.95	0.0030346			406.95	0.0041751			406.95	0.0002669			406.95	0.0009367			406.95	0.0020704			406.95	0.0001649			406.95	0.0002922			406.95	0.0009503
407.95	0.0039039			407.95	0.000814			407.95	0.0030506			407.95	0.0041919			407.95	0.0002706			407.95	0.0009508			407.95	0.0020818			407.95	0.000168			407.95	0.0002976			407.95	0.0009569
408.95	0.003828			408.95	0.0008245			408.95	0.0030663			408.95	0.0042076			408.95	0.0002743			408.95	0.000965			408.95	0.0020931			408.95	0.0001712			408.95	0.000303			408.95	0.0009634
409.95	0.0037461			409.95	0.0008352			409.95	0.0030817			409.95	0.0042213			409.95	0.0002781			409.95	0.0009794			409.95	0.0021046			409.95	0.0001743			409.95	0.0003084			409.95	0.00097
410.95	0.0036587			410.95	0.000846			410.95	0.003097			410.95	0.0042326			410.95	0.0002818			410.95	0.000994			410.95	0.002116			410.95	0.0001774			410.95	0.0003139			410.95	0.0009764
411.95	0.0035661			411.95	0.000857			411.95	0.003112			411.95	0.0042407			411.95	0.0002855			411.95	0.0010087			411.95	0.0021275			411.95	0.0001805			411.95	0.0003195			411.95	0.0009828
412.95	0.0034688			412.95	0.000868			412.95	0.0031268			412.95	0.0042451			412.95	0.0002892			412.95	0.0010235			412.95	0.0021391			412.95	0.0001836			412.95	0.0003251			412.95	0.0009892
413.95	0.0033674			413.95	0.0008792			413.95	0.0031415			413.95	0.0042449			413.95	0.0002929			413.95	0.0010384			413.95	0.0021507			413.95	0.0001867			413.95	0.0003308			413.95	0.0009956
414.95	0.0032624			414.95	0.0008906			414.95	0.0031559			414.95	0.0042396			414.95	0.0002967			414.95	0.0010534			414.95	0.0021623			414.95	0.0001898			414.95	0.0003365			414.95	0.0010019
415.95	0.0031544			415.95	0.0009021			415.95	0.0031703			415.95	0.0042287			415.95	0.0003004			415.95	0.0010685			415.95	0.002174			415.95	0.0001929			415.95	0.0003423			415.95	0.0010083
416.95	0.0030439			416.95	0.0009137			416.95	0.0031846			416.95	0.0042116			416.95	0.0003041			416.95	0.0010838			416.95	0.0021857			416.95	0.0001959			416.95	0.0003482			416.95	0.0010146
417.95	0.0029317			417.95	0.0009254			417.95	0.0031987			417.95	0.0041879			417.95	0.0003079			417.95	0.0010991			417.95	0.0021975			417.95	0.000199			417.95	0.0003541			417.95	0.0010209
418.95	0.0028182			418.95	0.0009373			418.95	0.0032128			418.95	0.0041574			418.95	0.0003116			418.95	0.0011145			418.95	0.0022094			418.95	0.000202			418.95	0.00036			418.95	0.0010272
419.95	0.002704			419.95	0.0009493			419.95	0.0032268			419.95	0.0041198			419.95	0.0003153			419.95	0.0011299			419.95	0.0022213			419.95	0.0002051			419.95	0.0003661			419.95	0.0010336
420.95	0.0025896			420.95	0.0009614			420.95	0.0032408			420.95	0.0040751			420.95	0.0003191			420.95	0.0011454			420.95	0.0022333			420.95	0.0002081			420.95	0.0003722			420.95	0.00104
421.95	0.0024756			421.95	0.0009737			421.95	0.0032547			421.95	0.0040232			421.95	0.0003228			421.95	0.001161			421.95	0.0022454			421.95	0.0002111			421.95	0.0003784			421.95	0.0010463
422.95	0.0023625			422.95	0.0009861			422.95	0.0032687			422.95	0.0039642			422.95	0.0003266			422.95	0.0011765			422.95	0.0022576			422.95	0.0002142			422.95	0.0003846			422.95	0.0010528
423.95	0.0022506			423.95	0.0009986			423.95	0.0032826			423.95	0.0038984			423.95	0.0003303			423.95	0.0011921			423.95	0.0022699			423.95	0.0002172			423.95	0.0003909			423.95	0.0010592
424.95	0.0021404			424.95	0.0010112			424.95	0.0032965			424.95	0.003826			424.95	0.0003341			424.95	0.0012077			424.95	0.0022823			424.95	0.0002202			424.95	0.0003973			424.95	0.0010658
425.95	0.0020321			425.95	0.001024			425.95	0.0033105			425.95	0.0037473			425.95	0.0003378			425.95	0.0012233			425.95	0.0022949			425.95	0.0002232			425.95	0.0004037			425.95	0.0010723
426.95	0.0019263			426.95	0.0010368			426.95	0.0033245			426.95	0.0036627			426.95	0.0003416			426.95	0.0012389			426.95	0.0023076			426.95	0.0002262			426.95	0.0004102			426.95	0.001079
427.95	0.001823			427.95	0.0010498			427.95	0.0033385			427.95	0.0035727			427.95	0.0003454			427.95	0.0012544			427.95	0.0023204			427.95	0.0002292			427.95	0.0004168			427.95	0.0010856
428.95	0.0017227			428.95	0.0010629			428.95	0.0033526			428.95	0.0034777			428.95	0.0003492			428.95	0.0012699			428.95	0.0023335			428.95	0.0002321			428.95	0.0004235			428.95	0.0010924
429.95	0.0016255			429.95	0.0010761			429.95	0.0033668			429.95	0.0033784			429.95	0.000353			429.95	0.0012853			429.95	0.0023466			429.95	0.0002351			429.95	0.0004302			429.95	0.0010992
430.95	0.0015315			430.95	0.0010893			430.95	0.003381			430.95	0.0032752			430.95	0.0003568			430.95	0.0013006			430.95	0.00236			430.95	0.0002381			430.95	0.0004371			430.95	0.0011061
431.95	0.0014411			431.95	0.0011027			431.95	0.0033953			431.95	0.0031687			431.95	0.0003607			431.95	0.0013158			431.95	0.0023735			431.95	0.0002411			431.95	0.000444			431.95	0.0011131
432.95	0.0013542			432.95	0.0011161			432.95	0.0034097			432.95	0.0030596			432.95	0.0003645			432.95	0.0013309			432.95	0.0023872			432.95	0.000244			432.95	0.0004509			432.95	0.0011202
433.95	0.001271			433.95	0.0011297			433.95	0.0034241			433.95	0.0029484			433.95	0.0003684			433.95	0.0013459			433.95	0.0024012			433.95	0.000247			433.95	0.000458			433.95	0.0011274
434.95	0.0011916			434.95	0.0011432			434.95	0.0034387			434.95	0.0028358			434.95	0.0003722			434.95	0.0013607			434.95	0.0024153			434.95	0.0002499			434.95	0.0004651			434.95	0.0011346
435.95	0.0011159			435.95	0.0011569			435.95	0.0034533			435.95	0.0027222			435.95	0.0003761			435.95	0.0013754			435.95	0.0024297			435.95	0.0002529			435.95	0.0004723			435.95	0.001142
436.95	0.0010439			436.95	0.0011705			436.95	0.003468			436.95	0.0026083			436.95	0.00038			436.95	0.0013899			436.95	0.0024442			436.95	0.0002559			436.95	0.0004796			436.95	0.0011494
437.95	0.0009757			437.95	0.0011842			437.95	0.0034828			437.95	0.0024945			437.95	0.0003839			437.95	0.0014042			437.95	0.002459			437.95	0.0002588			437.95	0.000487			437.95	0.001157
438.95	0.000911			438.95	0.001198			438.95	0.0034977			438.95	0.0023813			438.95	0.0003879			438.95	0.0014183			438.95	0.002474			438.95	0.0002618			438.95	0.0004944			438.95	0.0011646
439.95	0.0008499			439.95	0.0012117			439.95	0.0035128			439.95	0.0022693			439.95	0.0003918			439.95	0.0014322			439.95	0.0024892			439.95	0.0002647			439.95	0.000502			439.95	0.0011724
440.95	0.0007921			440.95	0.0012255			440.95	0.0035279			440.95	0.0021588			440.95	0.0003958			440.95	0.0014458			440.95	0.0025047			440.95	0.0002676			440.95	0.0005096			440.95	0.0011802
441.95	0.0007376			441.95	0.0012392			441.95	0.0035432			441.95	0.0020502			441.95	0.0003998			441.95	0.0014592			441.95	0.0025203			441.95	0.0002706			441.95	0.0005173			441.95	0.0011882
442.95	0.0006862			442.95	0.0012529			442.95	0.0035587			442.95	0.0019438			442.95	0.0004038			442.95	0.0014724			442.95	0.0025362			442.95	0.0002735			442.95	0.0005251			442.95	0.0011963
443.95	0.0006377			443.95	0.0012666			443.95	0.0035745			443.95	0.00184			443.95	0.0004078			443.95	0.0014852			443.95	0.0025523			443.95	0.0002765			443.95	0.000533			443.95	0.0012044
444.95	0.000592			444.95	0.0012803			444.95	0.0035905			444.95	0.0017389			444.95	0.0004119			444.95	0.0014978			444.95	0.0025686			444.95	0.0002794			444.95	0.0005409			444.95	0.0012127
445.95	0.0005488			445.95	0.0012938			445.95	0.0036069			445.95	0.0016408			445.95	0.000416			445.95	0.0015102			445.95	0.0025852			445.95	0.0002824			445.95	0.000549			445.95	0.0012211
446.95	0.0005082			446.95	0.0013073			446.95	0.0036237			446.95	0.0015459			446.95	0.0004201			446.95	0.0015222			446.95	0.0026019			446.95	0.0002853			446.95	0.0005571			446.95	0.0012297
447.95	0.0004699			447.95	0.0013208			447.95	0.003641			447.95	0.0014544			447.95	0.0004242			447.95	0.0015339			447.95	0.0026188			447.95	0.0002883			447.95	0.0005653			447.95	0.0012383
448.95	0.0004338			448.95	0.0013341			448.95	0.0036589			448.95	0.0013663			448.95	0.0004284			448.95	0.0015454			448.95	0.0026359			448.95	0.0002912			448.95	0.0005736			448.95	0.001247
449.95	0.0003998			449.95	0.0013473			449.95	0.0036776			449.95	0.0012817			449.95	0.0004325			449.95	0.0015566			449.95	0.0026532			449.95	0.0002942			449.95	0.000582			449.95	0.0012558
450.95	0.0003678			450.95	0.0013603			450.95	0.0036972			450.95	0.0012009			450.95	0.0004368			450.95	0.0015674			450.95	0.0026706			450.95	0.0002972			450.95	0.0005905			450.95	0.0012648
451.95	0.0003377			451.95	0.0013733			451.95	0.0037177			451.95	0.0011237			451.95	0.000441			451.95	0.001578			451.95	0.0026882			451.95	0.0003001			451.95	0.000599			451.95	0.0012739
452.95	0.0003095			452.95	0.001386			452.95	0.0037393			452.95	0.0010502			452.95	0.0004453			452.95	0.0015883			452.95	0.0027059			452.95	0.0003031			452.95	0.0006076			452.95	0.001283
453.95	0.0002829			453.95	0.0013986			453.95	0.003762			453.95	0.0009805			453.95	0.0004496			453.95	0.0015984			453.95	0.0027238			453.95	0.0003061			453.95	0.0006163			453.95	0.0012923
454.95	0.000258			454.95	0.001411			454.95	0.0037859			454.95	0.0009144			454.95	0.0004539			454.95	0.0016082			454.95	0.0027418			454.95	0.0003091			454.95	0.0006251			454.95	0.0013016
455.95	0.0002347			455.95	0.0014232			455.95	0.003811			455.95	0.000852			455.95	0.0004583			455.95	0.0016177			455.95	0.00276			455.95	0.000312			455.95	0.0006339			455.95	0.0013111
456.95	0.0002129			456.95	0.0014352			456.95	0.0038371			456.95	0.0007931			456.95	0.0004627			456.95	0.001627			456.95	0.0027783			456.95	0.000315			456.95	0.0006428			456.95	0.0013207
457.95	0.0001925			457.95	0.001447			457.95	0.0038642			457.95	0.0007375			457.95	0.0004671			457.95	0.0016361			457.95	0.0027968			457.95	0.000318			457.95	0.0006518			457.95	0.0013303
458.95	0.0001735			458.95	0.0014585			458.95	0.0038919			458.95	0.0006853			458.95	0.0004716			458.95	0.001645			458.95	0.0028155			458.95	0.0003211			458.95	0.0006608			458.95	0.0013401
459.95	0.0001558			459.95	0.0014697			459.95	0.0039199			459.95	0.0006361			459.95	0.0004761			459.95	0.0016537			459.95	0.0028344			459.95	0.0003241			459.95	0.0006699			459.95	0.0013499
460.95	0.0001396			460.95	0.0014807			460.95	0.0039479			460.95	0.0005899			460.95	0.0004807			460.95	0.0016622			460.95	0.0028537			460.95	0.0003271			460.95	0.000679			460.95	0.0013599
461.95	0.0001246			461.95	0.0014915			461.95	0.0039752			461.95	0.0005465			461.95	0.0004853			461.95	0.0016705			461.95	0.0028733			461.95	0.0003301			461.95	0.0006882			461.95	0.0013699
462.95	0.000111			462.95	0.0015019			462.95	0.0040014			462.95	0.0005057			462.95	0.0004899			462.95	0.0016788			462.95	0.0028934			462.95	0.0003332			462.95	0.0006974			462.95	0.00138
463.95	9.87e-05			463.95	0.0015121			463.95	0.0040258			463.95	0.0004674			463.95	0.0004946			463.95	0.0016868			463.95	0.0029141			463.95	0.0003363			463.95	0.0007066			463.95	0.0013902
464.95	8.78e-05			464.95	0.0015219			464.95	0.0040476			464.95	0.0004314			464.95	0.0004993			464.95	0.0016948			464.95	0.0029355			464.95	0.0003393			464.95	0.0007159			464.95	0.0014005
465.95	7.82e-05			465.95	0.0015315			465.95	0.0040661			465.95	0.0003977			465.95	0.000504			465.95	0.0017027			465.95	0.0029578			465.95	0.0003424			465.95	0.0007252			465.95	0.0014109
466.95	6.98e-05			466.95	0.0015408			466.95	0.0040807			466.95	0.000366			466.95	0.0005088			466.95	0.0017105			466.95	0.002981			466.95	0.0003455			466.95	0.0007345			466.95	0.0014214
467.95	6.27e-05			467.95	0.0015497			467.95	0.0040906			467.95	0.0003363			467.95	0.0005137			467.95	0.0017183			467.95	0.0030054			467.95	0.0003486			467.95	0.0007438			467.95	0.001432
468.95	5.67e-05			468.95	0.0015584			468.95	0.0040951			468.95	0.0003085			468.95	0.0005186			468.95	0.001726			468.95	0.003031			468.95	0.0003518			468.95	0.0007531			468.95	0.0014426
469.95	5.17e-05			469.95	0.0015667			469.95	0.0040937			469.95	0.0002824			469.95	0.0005235			469.95	0.0017336			469.95	0.0030581			469.95	0.0003549			469.95	0.0007624			469.95	0.0014534
470.95	4.76e-05			470.95	0.0015748			470.95	0.0040858			470.95	0.000258			470.95	0.0005285			470.95	0.0017413			470.95	0.0030866			470.95	0.0003581			470.95	0.0007717			470.95	0.0014643
471.95	4.44e-05			471.95	0.0015826			471.95	0.0040711			471.95	0.0002352			471.95	0.0005335			471.95	0.0017489			471.95	0.0031167			471.95	0.0003613			471.95	0.000781			471.95	0.0014752
472.95	4.17e-05			472.95	0.00159			472.95	0.0040492			472.95	0.0002138			472.95	0.0005386			472.95	0.0017565			472.95	0.0031484			472.95	0.0003645			472.95	0.0007902			472.95	0.0014863
473.95	3.97e-05			473.95	0.0015973			473.95	0.00402			473.95	0.0001939			473.95	0.0005437			473.95	0.0017642			473.95	0.0031815			473.95	0.0003677			473.95	0.0007994			473.95	0.0014975
474.95	3.81e-05			474.95	0.0016042			474.95	0.0039832			474.95	0.0001754			474.95	0.0005488			474.95	0.0017719			474.95	0.0032158			474.95	0.0003709			474.95	0.0008085			474.95	0.0015088
475.95	3.69e-05			475.95	0.0016109			475.95	0.0039389			475.95	0.0001581			475.95	0.000554			475.95	0.0017796			475.95	0.0032511			475.95	0.0003742			475.95	0.0008176			475.95	0.0015202
476.95	3.6e-05			476.95	0.0016173			476.95	0.0038873			476.95	0.000142			476.95	0.0005593			476.95	0.0017874			476.95	0.0032869			476.95	0.0003774			476.95	0.0008266			476.95	0.0015318
477.95	3.53e-05			477.95	0.0016236			477.95	0.0038284			477.95	0.0001272			477.95	0.0005646			477.95	0.0017952			477.95	0.0033227			477.95	0.0003807			477.95	0.0008355			477.95	0.0015435
478.95	3.48e-05			478.95	0.0016296			478.95	0.0037625			478.95	0.0001136			478.95	0.0005699			478.95	0.0018031			478.95	0.0033579			478.95	0.0003841			478.95	0.0008443			478.95	0.0015553
479.95	3.45e-05			479.95	0.0016354			479.95	0.00369			479.95	0.0001012			479.95	0.0005754			479.95	0.001811			479.95	0.0033916			479.95	0.0003874			479.95	0.000853			479.95	0.0015672
480.95	3.43e-05			480.95	0.001641			480.95	0.0036112			480.95	9e-05			480.95	0.0005808			480.95	0.0018191			480.95	0.0034232			480.95	0.0003908			480.95	0.0008616			480.95	0.0015792
481.95	3.41e-05			481.95	0.0016465			481.95	0.0035267			481.95	7.99e-05			481.95	0.0005863			481.95	0.0018273			481.95	0.0034517			481.95	0.0003941			481.95	0.0008701			481.95	0.0015914
482.95	3.4e-05			482.95	0.0016518			482.95	0.0034368			482.95	7.11e-05			482.95	0.0005919			482.95	0.0018356			482.95	0.0034763			482.95	0.0003976			482.95	0.0008784			482.95	0.0016037
483.95	3.39e-05			483.95	0.001657			483.95	0.0033422			483.95	6.34e-05			483.95	0.0005975			483.95	0.001844			483.95	0.0034961			483.95	0.000401			483.95	0.0008866			483.95	0.0016162
484.95	3.39e-05			484.95	0.0016621			484.95	0.0032435			484.95	5.67e-05			484.95	0.0006031			484.95	0.0018525			484.95	0.0035103			484.95	0.0004045			484.95	0.0008946			484.95	0.0016287
485.95	3.39e-05			485.95	0.001667			485.95	0.0031411			485.95	5.11e-05			485.95	0.0006088			485.95	0.0018612			485.95	0.0035183			485.95	0.0004079			485.95	0.0009024			485.95	0.0016413
486.95	3.38e-05			486.95	0.0016719			486.95	0.0030358			486.95	4.65e-05			486.95	0.0006146			486.95	0.0018701			486.95	0.0035194			486.95	0.0004115			486.95	0.0009101			486.95	0.0016541
487.95	3.38e-05			487.95	0.0016767			487.95	0.0029282			487.95	4.26e-05			487.95	0.0006204			487.95	0.0018791			487.95	0.0035132			487.95	0.000415			487.95	0.0009175			487.95	0.0016669
488.95	3.38e-05			488.95	0.0016815			488.95	0.0028188			488.95	3.96e-05			488.95	0.0006263			488.95	0.0018883			488.95	0.0034992			488.95	0.0004186			488.95	0.0009248			488.95	0.0016799
489.95	3.37e-05			489.95	0.0016862			489.95	0.0027083			489.95	3.71e-05			489.95	0.0006322			489.95	0.0018978			489.95	0.0034774			489.95	0.0004222			489.95	0.0009318			489.95	0.0016929
490.95	3.36e-05			490.95	0.0016909			490.95	0.0025971			490.95	3.52e-05			490.95	0.0006381			490.95	0.0019074			490.95	0.0034475			490.95	0.0004258			490.95	0.0009386			490.95	0.001706
491.95	3.36e-05			491.95	0.0016955			491.95	0.0024859			491.95	3.37e-05			491.95	0.0006441			491.95	0.0019172			491.95	0.0034096			491.95	0.0004295			491.95	0.0009452			491.95	0.0017192
492.95	3.35e-05			492.95	0.0017002			492.95	0.0023751			492.95	3.25e-05			492.95	0.0006502			492.95	0.0019272			492.95	0.0033638			492.95	0.0004332			492.95	0.0009515			492.95	0.0017326
493.95	3.34e-05			493.95	0.0017049			493.95	0.0022652			493.95	3.17e-05			493.95	0.0006563			493.95	0.0019374			493.95	0.0033105			493.95	0.0004369			493.95	0.0009576			493.95	0.001746
494.95	3.33e-05			494.95	0.0017095			494.95	0.0021565			494.95	3.11e-05			494.95	0.0006625			494.95	0.0019479			494.95	0.0032498			494.95	0.0004407			494.95	0.0009634			494.95	0.0017595
495.95	3.32e-05			495.95	0.0017143			495.95	0.0020495			495.95	3.06e-05			495.95	0.0006687			495.95	0.0019585			495.95	0.0031822			495.95	0.0004444			495.95	0.0009689			495.95	0.0017731
496.95	3.31e-05			496.95	0.001719			496.95	0.0019443			496.95	3.03e-05			496.95	0.000675			496.95	0.0019694			496.95	0.0031081			496.95	0.0004483			496.95	0.0009741			496.95	0.0017869
497.95	3.3e-05			497.95	0.0017238			497.95	0.0018414			497.95	3.01e-05			497.95	0.0006813			497.95	0.0019805			497.95	0.0030281			497.95	0.0004521			497.95	0.0009791			497.95	0.0018008
498.95	3.29e-05			498.95	0.0017287			498.95	0.001741			498.95	3e-05			498.95	0.0006876			498.95	0.0019919			498.95	0.0029428			498.95	0.000456			498.95	0.0009838			498.95	0.0018149
499.95	3.29e-05			499.95	0.0017336			499.95	0.0016432			499.95	3e-05			499.95	0.000694			499.95	0.0020035			499.95	0.0028526			499.95	0.0004599			499.95	0.0009882			499.95	0.0018291
500.95	3.28e-05			500.95	0.0017386			500.95	0.0015482			500.95	2.99e-05			500.95	0.0007005			500.95	0.0020153			500.95	0.0027584			500.95	0.0004639			500.95	0.0009923			500.95	0.0018435
501.95	3.28e-05			501.95	0.0017437			501.95	0.0014562			501.95	3e-05			501.95	0.000707			501.95	0.0020273			501.95	0.0026606			501.95	0.0004679			501.95	0.0009962			501.95	0.0018582
502.95	3.28e-05			502.95	0.0017489			502.95	0.0013675			502.95	3e-05			502.95	0.0007135			502.95	0.0020395			502.95	0.00256			502.95	0.0004719			502.95	0.0009997			502.95	0.001873
503.95	3.28e-05			503.95	0.0017543			503.95	0.001282			503.95	3e-05			503.95	0.0007201			503.95	0.002052			503.95	0.0024572			503.95	0.000476			503.95	0.001003			503.95	0.0018881
504.95	3.28e-05			504.95	0.0017597			504.95	0.0011999			504.95	3e-05			504.95	0.0007268			504.95	0.0020647			504.95	0.0023528			504.95	0.0004801			504.95	0.001006			504.95	0.0019034
505.95	3.28e-05			505.95	0.0017653			505.95	0.0011213			505.95	3e-05			505.95	0.0007334			505.95	0.0020776			505.95	0.0022473			505.95	0.0004842			505.95	0.0010088			505.95	0.0019189
506.95	3.28e-05			506.95	0.0017711			506.95	0.0010464			506.95	3e-05			506.95	0.0007401			506.95	0.0020908			506.95	0.0021414			506.95	0.0004884			506.95	0.0010113			506.95	0.0019348
507.95	3.28e-05			507.95	0.001777			507.95	0.000975			507.95	3e-05			507.95	0.0007469			507.95	0.0021041			507.95	0.0020356			507.95	0.0004926			507.95	0.0010136			507.95	0.0019509
508.95	3.28e-05			508.95	0.0017831			508.95	0.0009074			508.95	2.99e-05			508.95	0.0007537			508.95	0.0021177			508.95	0.0019304			508.95	0.0004969			508.95	0.0010156			508.95	0.0019673
509.95	3.28e-05			509.95	0.0017894			509.95	0.0008434			509.95	2.99e-05			509.95	0.0007605			509.95	0.0021315			509.95	0.0018262			509.95	0.0005012			509.95	0.0010175			509.95	0.0019841
510.95	3.27e-05			510.95	0.0017959			510.95	0.000783			510.95	2.98e-05			510.95	0.0007673			510.95	0.0021456			510.95	0.0017234			510.95	0.0005055			510.95	0.0010191			510.95	0.0020012
511.95	3.27e-05			511.95	0.0018026			511.95	0.0007263			511.95	2.97e-05			511.95	0.0007742			511.95	0.0021598			511.95	0.0016225			511.95	0.0005099			511.95	0.0010206			511.95	0.0020186
512.95	3.26e-05			512.95	0.0018096			512.95	0.000673			512.95	2.96e-05			512.95	0.0007811			512.95	0.0021743			512.95	0.0015239			512.95	0.0005143			512.95	0.0010219			512.95	0.0020363
513.95	3.26e-05			513.95	0.0018168			513.95	0.000623			513.95	2.95e-05			513.95	0.000788			513.95	0.002189			513.95	0.0014279			513.95	0.0005187			513.95	0.0010231			513.95	0.0020544
514.95	3.25e-05			514.95	0.0018243			514.95	0.0005763			514.95	2.94e-05			514.95	0.0007949			514.95	0.002204			514.95	0.0013348			514.95	0.0005232			514.95	0.0010241			514.95	0.0020729
515.95	3.24e-05			515.95	0.001832			515.95	0.0005326			515.95	2.93e-05			515.95	0.0008018			515.95	0.0022191			515.95	0.0012449			515.95	0.0005277			515.95	0.001025			515.95	0.0020917
516.95	3.23e-05			516.95	0.0018401			516.95	0.0004918			516.95	2.92e-05			516.95	0.0008088			516.95	0.0022345			516.95	0.0011584			516.95	0.0005323			516.95	0.0010259			516.95	0.0021109
517.95	3.22e-05			517.95	0.0018484			517.95	0.0004537			517.95	2.92e-05			517.95	0.0008157			517.95	0.0022501			517.95	0.0010756			517.95	0.0005369			517.95	0.0010267			517.95	0.0021305
518.95	3.22e-05			518.95	0.001857			518.95	0.0004181			518.95	2.91e-05			518.95	0.0008227			518.95	0.002266			518.95	0.0009966			518.95	0.0005415			518.95	0.0010274			518.95	0.0021504
519.95	3.21e-05			519.95	0.0018659			519.95	0.0003849			519.95	2.9e-05			519.95	0.0008296			519.95	0.002282			519.95	0.0009216			519.95	0.0005462			519.95	0.0010281			519.95	0.0021706
520.95	3.2e-05			520.95	0.0018752			520.95	0.0003538			520.95	2.9e-05			520.95	0.0008366			520.95	0.0022983			520.95	0.0008506			520.95	0.0005509			520.95	0.0010289			520.95	0.0021912
521.95	3.18e-05			521.95	0.0018847			521.95	0.0003248			521.95	2.9e-05			521.95	0.0008435			521.95	0.0023148			521.95	0.0007836			521.95	0.0005556			521.95	0.0010296			521.95	0.0022122
522.95	3.17e-05			522.95	0.0018946			522.95	0.0002978			522.95	2.9e-05			522.95	0.0008504			522.95	0.0023316			522.95	0.0007207			522.95	0.0005604			522.95	0.0010303			522.95	0.0022335
523.95	3.16e-05			523.95	0.0019048			523.95	0.0002725			523.95	2.9e-05			523.95	0.0008573			523.95	0.0023485			523.95	0.0006617			523.95	0.0005652			523.95	0.0010311			523.95	0.0022552
524.95	3.15e-05			524.95	0.0019153			524.95	0.0002489			524.95	2.9e-05			524.95	0.0008641			524.95	0.0023656			524.95	0.0006066			524.95	0.00057			524.95	0.0010319			524.95	0.0022773
525.95	3.14e-05			525.95	0.0019262			525.95	0.000227			525.95	2.9e-05			525.95	0.0008709			525.95	0.002383			525.95	0.0005552			525.95	0.0005749			525.95	0.0010328			525.95	0.0022997
526.95	3.13e-05			526.95	0.0019373			526.95	0.0002065			526.95	2.9e-05			526.95	0.0008777			526.95	0.0024005			526.95	0.0005074			526.95	0.0005798			526.95	0.0010338			526.95	0.0023226
527.95	3.12e-05			527.95	0.0019488			527.95	0.0001874			527.95	2.9e-05			527.95	0.0008844			527.95	0.0024182			527.95	0.000463			527.95	0.0005848			527.95	0.001035			527.95	0.0023459
528.95	3.11e-05			528.95	0.0019607			528.95	0.0001697			528.95	2.89e-05			528.95	0.0008911			528.95	0.0024362			528.95	0.0004219			528.95	0.0005898			528.95	0.0010362			528.95	0.0023696
529.95	3.1e-05			529.95	0.0019728			529.95	0.0001532			529.95	2.89e-05			529.95	0.0008977			529.95	0.0024543			529.95	0.0003838			529.95	0.0005948			529.95	0.0010376			529.95	0.0023939
530.95	3.09e-05			530.95	0.0019853			530.95	0.0001379			530.95	2.89e-05			530.95	0.0009042			530.95	0.0024725			530.95	0.0003486			530.95	0.0005999			530.95	0.0010391			530.95	0.0024188
531.95	3.08e-05			531.95	0.0019981			531.95	0.0001237			531.95	2.88e-05			531.95	0.0009107			531.95	0.002491			531.95	0.0003161			531.95	0.000605			531.95	0.0010408			531.95	0.0024444
532.95	3.07e-05			532.95	0.0020112			532.95	0.0001107			532.95	2.88e-05			532.95	0.000917			532.95	0.0025096			532.95	0.0002862			532.95	0.0006101			532.95	0.0010426			532.95	0.0024708
533.95	3.05e-05			533.95	0.0020247			533.95	9.88e-05			533.95	2.87e-05			533.95	0.0009233			533.95	0.0025283			533.95	0.0002587			533.95	0.0006153			533.95	0.0010447			533.95	0.002498
534.95	3.04e-05			534.95	0.0020384			534.95	8.8e-05			534.95	2.86e-05			534.95	0.0009295			534.95	0.0025472			534.95	0.0002334			534.95	0.0006205			534.95	0.0010469			534.95	0.0025261
535.95	3.03e-05			535.95	0.0020525			535.95	7.82e-05			535.95	2.86e-05			535.95	0.0009355			535.95	0.0025663			535.95	0.0002101			535.95	0.0006257			535.95	0.0010494			535.95	0.0025554
536.95	3.02e-05			536.95	0.0020669			536.95	6.96e-05			536.95	2.85e-05			536.95	0.0009415			536.95	0.0025854			536.95	0.0001888			536.95	0.0006309			536.95	0.0010521			536.95	0.0025858
537.95	3.01e-05			537.95	0.0020816			537.95	6.2e-05			537.95	2.84e-05			537.95	0.0009473			537.95	0.0026047			537.95	0.0001693			537.95	0.0006362			537.95	0.001055			537.95	0.0026175
538.95	3e-05			538.95	0.0020966			538.95	5.54e-05			538.95	2.83e-05			538.95	0.000953			538.95	0.0026241			538.95	0.0001513			538.95	0.0006415			538.95	0.0010582			538.95	0.0026505
539.95	2.99e-05			539.95	0.0021119			539.95	4.98e-05			539.95	2.82e-05			539.95	0.0009585			539.95	0.0026436			539.95	0.0001349			539.95	0.0006468			539.95	0.0010617			539.95	0.0026848
540.95	2.98e-05			540.95	0.0021276			540.95	4.51e-05			540.95	2.81e-05			540.95	0.0009639			540.95	0.0026631			540.95	0.00012			540.95	0.0006521			540.95	0.0010655			540.95	0.0027205
541.95	2.97e-05			541.95	0.0021435			541.95	4.12e-05			541.95	2.8e-05			541.95	0.0009692			541.95	0.0026827			541.95	0.0001064			541.95	0.0006575			541.95	0.0010695			541.95	0.0027574
542.95	2.96e-05			542.95	0.0021598			542.95	3.8e-05			542.95	2.79e-05			542.95	0.0009742			542.95	0.0027024			542.95	9.4e-05			542.95	0.0006629			542.95	0.0010739			542.95	0.0027953
543.95	2.95e-05			543.95	0.0021764			543.95	3.54e-05			543.95	2.79e-05			543.95	0.0009791			543.95	0.0027222			543.95	8.3e-05			543.95	0.0006683			543.95	0.0010786			543.95	0.0028341
544.95	2.94e-05			544.95	0.0021932			544.95	3.34e-05			544.95	2.78e-05			544.95	0.0009838			544.95	0.0027419			544.95	7.3e-05			544.95	0.0006737			544.95	0.0010836			544.95	0.0028733
545.95	2.93e-05			545.95	0.0022104			545.95	3.18e-05			545.95	2.77e-05			545.95	0.0009883			545.95	0.0027617			545.95	6.43e-05			545.95	0.0006791			545.95	0.0010889			545.95	0.0029125
546.95	2.92e-05			546.95	0.0022278			546.95	3.06e-05			546.95	2.76e-05			546.95	0.0009926			546.95	0.0027814			546.95	5.66e-05			546.95	0.0006846			546.95	0.0010947			546.95	0.002951
547.95	2.91e-05			547.95	0.0022456			547.95	2.96e-05			547.95	2.75e-05			547.95	0.0009967			547.95	0.0028011			547.95	5e-05			547.95	0.00069			547.95	0.0011007			547.95	0.0029884
548.95	2.9e-05			548.95	0.0022636			548.95	2.9e-05			548.95	2.74e-05			548.95	0.0010006			548.95	0.0028208			548.95	4.43e-05			548.95	0.0006955			548.95	0.0011072			548.95	0.0030237
549.95	2.89e-05			549.95	0.0022819			549.95	2.85e-05			549.95	2.73e-05			549.95	0.0010042			549.95	0.0028405			549.95	3.95e-05			549.95	0.0007009			549.95	0.001114			549.95	0.0030563
550.95	2.88e-05			550.95	0.0023004			550.95	2.81e-05			550.95	2.72e-05			550.95	0.0010077			550.95	0.00286			550.95	3.56e-05			550.95	0.0007064			550.95	0.0011212			550.95	0.0030852
551.95	2.87e-05			551.95	0.0023192			551.95	2.79e-05			551.95	2.71e-05			551.95	0.0010108			551.95	0.0028794			551.95	3.24e-05			551.95	0.0007118			551.95	0.0011288			551.95	0.0031096
552.95	2.86e-05			552.95	0.0023383			552.95	2.78e-05			552.95	2.7e-05			552.95	0.0010138			552.95	0.0028988			552.95	2.98e-05			552.95	0.0007173			552.95	0.0011368			552.95	0.0031288
553.95	2.85e-05			553.95	0.0023576			553.95	2.78e-05			553.95	2.69e-05			553.95	0.0010165			553.95	0.002918			553.95	2.77e-05			553.95	0.0007227			553.95	0.0011452			553.95	0.0031419
554.95	2.84e-05			554.95	0.0023772			554.95	2.77e-05			554.95	2.68e-05			554.95	0.0010189			554.95	0.002937			554.95	2.61e-05			554.95	0.0007281			554.95	0.001154			554.95	0.0031482
555.95	2.83e-05			555.95	0.002397			555.95	2.78e-05			555.95	2.67e-05			555.95	0.0010211			555.95	0.0029559			555.95	2.49e-05			555.95	0.0007335			555.95	0.0011633			555.95	0.0031472
556.95	2.82e-05			556.95	0.002417			556.95	2.78e-05			556.95	2.67e-05			556.95	0.001023			556.95	0.0029746			556.95	2.39e-05			556.95	0.0007389			556.95	0.0011729			556.95	0.0031383
557.95	2.81e-05			557.95	0.0024372			557.95	2.79e-05			557.95	2.66e-05			557.95	0.0010246			557.95	0.0029932			557.95	2.33e-05			557.95	0.0007442			557.95	0.001183			557.95	0.0031211
558.95	2.8e-05			558.95	0.0024576			558.95	2.79e-05			558.95	2.65e-05			558.95	0.001026			558.95	0.0030115			558.95	2.28e-05			558.95	0.0007496			558.95	0.0011934			558.95	0.0030955
559.95	2.79e-05			559.95	0.0024782			559.95	2.8e-05			559.95	2.64e-05			559.95	0.0010271			559.95	0.0030297			559.95	2.25e-05			559.95	0.0007548			559.95	0.0012043			559.95	0.0030613
560.95	2.78e-05			560.95	0.002499			560.95	2.81e-05			560.95	2.63e-05			560.95	0.0010279			560.95	0.0030477			560.95	2.22e-05			560.95	0.0007601			560.95	0.0012156			560.95	0.0030183
561.95	2.77e-05			561.95	0.00252			561.95	2.81e-05			561.95	2.62e-05			561.95	0.0010285			561.95	0.0030656			561.95	2.21e-05			561.95	0.0007653			561.95	0.0012274			561.95	0.0029668
562.95	2.76e-05			562.95	0.0025411			562.95	2.81e-05			562.95	2.61e-05			562.95	0.0010288			562.95	0.0030834			562.95	2.21e-05			562.95	0.0007704			562.95	0.0012395			562.95	0.002907
563.95	2.75e-05			563.95	0.0025623			563.95	2.81e-05			563.95	2.6e-05			563.95	0.0010288			563.95	0.0031012			563.95	2.21e-05			563.95	0.0007755			563.95	0.001252			563.95	0.0028392
564.95	2.74e-05			564.95	0.0025837			564.95	2.81e-05			564.95	2.59e-05			564.95	0.0010286			564.95	0.003119			564.95	2.22e-05			564.95	0.0007805			564.95	0.0012649			564.95	0.002764
565.95	2.73e-05			565.95	0.0026053			565.95	2.81e-05			565.95	2.59e-05			565.95	0.0010281			565.95	0.0031369			565.95	2.22e-05			565.95	0.0007855			565.95	0.0012782			565.95	0.0026819
566.95	2.72e-05			566.95	0.0026269			566.95	2.8e-05			566.95	2.58e-05			566.95	0.0010273			566.95	0.003155			566.95	2.23e-05			566.95	0.0007904			566.95	0.0012918			566.95	0.0025936
567.95	2.71e-05			567.95	0.0026486			567.95	2.8e-05			567.95	2.57e-05			567.95	0.0010263			567.95	0.0031735			567.95	2.24e-05			567.95	0.0007952			567.95	0.0013059			567.95	0.0024998
568.95	2.71e-05			568.95	0.0026704			568.95	2.79e-05			568.95	2.56e-05			568.95	0.001025			568.95	0.0031925			568.95	2.26e-05			568.95	0.0007999			568.95	0.0013202			568.95	0.0024015
569.95	2.7e-05			569.95	0.0026923			569.95	2.78e-05			569.95	2.55e-05			569.95	0.0010235			569.95	0.0032121			569.95	2.27e-05			569.95	0.0008045			569.95	0.0013349			569.95	0.0022994
570.95	2.69e-05			570.95	0.0027143			570.95	2.77e-05			570.95	2.54e-05			570.95	0.0010218			570.95	0.0032327			570.95	2.28e-05			570.95	0.0008091			570.95	0.00135			570.95	0.0021944
571.95	2.68e-05			571.95	0.0027363			571.95	2.76e-05			571.95	2.53e-05			571.95	0.0010198			571.95	0.0032543			571.95	2.28e-05			571.95	0.0008135			571.95	0.0013653			571.95	0.0020873
572.95	2.67e-05			572.95	0.0027584			572.95	2.75e-05			572.95	2.53e-05			572.95	0.0010176			572.95	0.0032772			572.95	2.29e-05			572.95	0.0008178			572.95	0.001381			572.95	0.0019788
573.95	2.66e-05			573.95	0.0027805			573.95	2.74e-05			573.95	2.52e-05			573.95	0.0010152			573.95	0.0033016			573.95	2.3e-05			573.95	0.000822			573.95	0.0013969			573.95	0.0018697
574.95	2.65e-05			574.95	0.0028026			574.95	2.74e-05			574.95	2.51e-05			574.95	0.0010126			574.95	0.0033277			574.95	2.3e-05			574.95	0.0008261			574.95	0.001413			574.95	0.0017605
575.95	2.64e-05			575.95	0.0028247			575.95	2.73e-05			575.95	2.5e-05			575.95	0.0010098			575.95	0.0033558			575.95	2.31e-05			575.95	0.0008301			575.95	0.0014295			575.95	0.0016519
576.95	2.63e-05			576.95	0.0028468			576.95	2.72e-05			576.95	2.49e-05			576.95	0.0010068			576.95	0.0033859			576.95	2.31e-05			576.95	0.0008339			576.95	0.0014462			576.95	0.0015444
577.95	2.62e-05			577.95	0.0028688			577.95	2.72e-05			577.95	2.48e-05			577.95	0.0010036			577.95	0.0034183			577.95	2.31e-05			577.95	0.0008376			577.95	0.0014631			577.95	0.0014385
578.95	2.61e-05			578.95	0.0028909			578.95	2.71e-05			578.95	2.48e-05			578.95	0.0010002			578.95	0.003453			578.95	2.31e-05			578.95	0.0008411			578.95	0.0014802			578.95	0.0013346
579.95	2.61e-05			579.95	0.0029128			579.95	2.71e-05			579.95	2.47e-05			579.95	0.0009967			579.95	0.0034902			579.95	2.3e-05			579.95	0.0008445			579.95	0.0014975			579.95	0.0012333
580.95	2.6e-05			580.95	0.0029347			580.95	2.71e-05			580.95	2.46e-05			580.95	0.0009931			580.95	0.0035298			580.95	2.3e-05			580.95	0.0008477			580.95	0.001515			580.95	0.0011348
581.95	2.59e-05			581.95	0.0029565			581.95	2.71e-05			581.95	2.45e-05			581.95	0.0009893			581.95	0.0035719			581.95	2.29e-05			581.95	0.0008507			581.95	0.0015327			581.95	0.0010396
582.95	2.58e-05			582.95	0.0029781			582.95	2.71e-05			582.95	2.44e-05			582.95	0.0009853			582.95	0.0036164			582.95	2.28e-05			582.95	0.0008536			582.95	0.0015506			582.95	0.0009481
583.95	2.57e-05			583.95	0.0029997			583.95	2.71e-05			583.95	2.44e-05			583.95	0.0009813			583.95	0.0036631			583.95	2.28e-05			583.95	0.0008563			583.95	0.0015686			583.95	0.0008607
584.95	2.56e-05			584.95	0.0030211			584.95	2.71e-05			584.95	2.43e-05			584.95	0.0009771			584.95	0.0037119			584.95	2.27e-05			584.95	0.0008588			584.95	0.0015868			584.95	0.0007777
585.95	2.55e-05			585.95	0.0030423			585.95	2.71e-05			585.95	2.42e-05			585.95	0.0009729			585.95	0.0037625			585.95	2.25e-05			585.95	0.0008611			585.95	0.0016051			585.95	0.0006993
586.95	2.54e-05			586.95	0.0030633			586.95	2.71e-05			586.95	2.41e-05			586.95	0.0009685			586.95	0.0038146			586.95	2.24e-05			586.95	0.0008632			586.95	0.0016236			586.95	0.0006259
587.95	2.54e-05			587.95	0.0030842			587.95	2.71e-05			587.95	2.4e-05			587.95	0.000964			587.95	0.0038678			587.95	2.23e-05			587.95	0.0008651			587.95	0.0016422			587.95	0.0005577
588.95	2.53e-05			588.95	0.0031048			588.95	2.7e-05			588.95	2.4e-05			588.95	0.0009595			588.95	0.0039217			588.95	2.22e-05			588.95	0.0008668			588.95	0.001661			588.95	0.0004947
589.95	2.52e-05			589.95	0.0031252			589.95	2.7e-05			589.95	2.39e-05			589.95	0.0009549			589.95	0.0039758			589.95	2.2e-05			589.95	0.0008683			589.95	0.0016798			589.95	0.000437
590.95	2.51e-05			590.95	0.0031454			590.95	2.7e-05			590.95	2.38e-05			590.95	0.0009503			590.95	0.0040295			590.95	2.19e-05			590.95	0.0008695			590.95	0.0016988			590.95	0.0003844
591.95	2.5e-05			591.95	0.0031653			591.95	2.69e-05			591.95	2.37e-05			591.95	0.0009455			591.95	0.0040822			591.95	2.17e-05			591.95	0.0008706			591.95	0.001718			591.95	0.0003369
592.95	2.49e-05			592.95	0.003185			592.95	2.68e-05			592.95	2.36e-05			592.95	0.0009408			592.95	0.0041333			592.95	2.16e-05			592.95	0.0008714			592.95	0.0017372			592.95	0.0002942
593.95	2.48e-05			593.95	0.0032045			593.95	2.68e-05			593.95	2.36e-05			593.95	0.000936			593.95	0.0041822			593.95	2.15e-05			593.95	0.000872			593.95	0.0017566			593.95	0.0002561
594.95	2.48e-05			594.95	0.0032237			594.95	2.67e-05			594.95	2.35e-05			594.95	0.0009312			594.95	0.0042282			594.95	2.14e-05			594.95	0.0008724			594.95	0.0017761			594.95	0.0002222
595.95	2.47e-05			595.95	0.0032429			595.95	2.66e-05			595.95	2.34e-05			595.95	0.0009263			595.95	0.0042706			595.95	2.13e-05			595.95	0.0008725			595.95	0.0017957			595.95	0.0001923
596.95	2.46e-05			596.95	0.0032619			596.95	2.65e-05			596.95	2.33e-05			596.95	0.0009214			596.95	0.0043088			596.95	2.12e-05			596.95	0.0008724			596.95	0.0018154			596.95	0.0001659
597.95	2.45e-05			597.95	0.0032809			597.95	2.65e-05			597.95	2.33e-05			597.95	0.0009166			597.95	0.0043423			597.95	2.11e-05			597.95	0.0008721			597.95	0.0018352			597.95	0.0001427
598.95	2.44e-05			598.95	0.0032999			598.95	2.64e-05			598.95	2.32e-05			598.95	0.0009117			598.95	0.0043704			598.95	2.1e-05			598.95	0.0008715			598.95	0.0018552			598.95	0.0001225
599.95	2.44e-05			599.95	0.003319			599.95	2.63e-05			599.95	2.31e-05			599.95	0.0009068			599.95	0.0043928			599.95	2.09e-05			599.95	0.0008707			599.95	0.0018752			599.95	0.000105
600.95	2.43e-05			600.95	0.0033385			600.95	2.62e-05			600.95	2.3e-05			600.95	0.000902			600.95	0.0044089			600.95	2.08e-05			600.95	0.0008697			600.95	0.0018954			600.95	8.98e-05
601.95	2.42e-05			601.95	0.0033584			601.95	2.61e-05			601.95	2.3e-05			601.95	0.0008971			601.95	0.0044185			601.95	2.07e-05			601.95	0.0008684			601.95	0.0019157			601.95	7.68e-05
602.95	2.41e-05			602.95	0.0033788			602.95	2.6e-05			602.95	2.29e-05			602.95	0.0008923			602.95	0.0044213			602.95	2.06e-05			602.95	0.0008669			602.95	0.0019361			602.95	6.57e-05
603.95	2.4e-05			603.95	0.0034			603.95	2.59e-05			603.95	2.28e-05			603.95	0.0008876			603.95	0.0044172			603.95	2.06e-05			603.95	0.0008652			603.95	0.0019566			603.95	5.63e-05
604.95	2.4e-05			604.95	0.0034222			604.95	2.59e-05			604.95	2.27e-05			604.95	0.0008829			604.95	0.0044059			604.95	2.05e-05			604.95	0.0008633			604.95	0.0019773			604.95	4.84e-05
605.95	2.39e-05			605.95	0.0034456			605.95	2.58e-05			605.95	2.27e-05			605.95	0.0008782			605.95	0.0043875			605.95	2.04e-05			605.95	0.0008611			605.95	0.001998			605.95	4.19e-05
606.95	2.38e-05			606.95	0.0034703			606.95	2.57e-05			606.95	2.26e-05			606.95	0.0008736			606.95	0.004362			606.95	2.04e-05			606.95	0.0008588			606.95	0.0020189			606.95	3.65e-05
607.95	2.37e-05			607.95	0.0034967			607.95	2.56e-05			607.95	2.25e-05			607.95	0.0008691			607.95	0.0043295			607.95	2.03e-05			607.95	0.0008562			607.95	0.0020399			607.95	3.21e-05
608.95	2.36e-05			608.95	0.0035248			608.95	2.55e-05			608.95	2.25e-05			608.95	0.0008646			608.95	0.0042902			608.95	2.02e-05			608.95	0.0008534			608.95	0.002061			608.95	2.86e-05
609.95	2.36e-05			609.95	0.0035548			609.95	2.54e-05			609.95	2.24e-05			609.95	0.0008602			609.95	0.0042441			609.95	2.02e-05			609.95	0.0008504			609.95	0.0020823			609.95	2.59e-05
610.95	2.35e-05			610.95	0.0035869			610.95	2.54e-05			610.95	2.23e-05			610.95	0.0008559			610.95	0.0041915			610.95	2.01e-05			610.95	0.0008472			610.95	0.0021036			610.95	2.37e-05
611.95	2.34e-05			611.95	0.0036213			611.95	2.53e-05			611.95	2.22e-05			611.95	0.0008518			611.95	0.0041327			611.95	2e-05			611.95	0.0008439			611.95	0.0021251			611.95	2.21e-05
612.95	2.33e-05			612.95	0.003658			612.95	2.52e-05			612.95	2.22e-05			612.95	0.0008477			612.95	0.004068			612.95	2e-05			612.95	0.0008403			612.95	0.0021467			612.95	2.08e-05
613.95	2.33e-05			613.95	0.0036971			613.95	2.51e-05			613.95	2.21e-05			613.95	0.0008437			613.95	0.0039977			613.95	1.99e-05			613.95	0.0008366			613.95	0.0021684			613.95	1.99e-05
614.95	2.32e-05			614.95	0.0037386			614.95	2.5e-05			614.95	2.2e-05			614.95	0.0008398			614.95	0.0039221			614.95	1.99e-05			614.95	0.0008327			614.95	0.0021903			614.95	1.93e-05
615.95	2.31e-05			615.95	0.0037826			615.95	2.49e-05			615.95	2.2e-05			615.95	0.0008361			615.95	0.0038417			615.95	1.98e-05			615.95	0.0008286			615.95	0.0022122			615.95	1.88e-05
616.95	2.3e-05			616.95	0.003829			616.95	2.49e-05			616.95	2.19e-05			616.95	0.0008325			616.95	0.0037567			616.95	1.97e-05			616.95	0.0008244			616.95	0.0022343			616.95	1.85e-05
617.95	2.29e-05			617.95	0.0038777			617.95	2.48e-05			617.95	2.18e-05			617.95	0.0008291			617.95	0.0036677			617.95	1.97e-05			617.95	0.0008201			617.95	0.0022565			617.95	1.83e-05
618.95	2.29e-05			618.95	0.0039286			618.95	2.47e-05			618.95	2.18e-05			618.95	0.0008258			618.95	0.0035751			618.95	1.96e-05			618.95	0.0008156			618.95	0.0022789			618.95	1.82e-05
619.95	2.28e-05			619.95	0.0039816			619.95	2.46e-05			619.95	2.17e-05			619.95	0.0008226			619.95	0.0034793			619.95	1.96e-05			619.95	0.000811			619.95	0.0023013			619.95	1.81e-05
620.95	2.27e-05			620.95	0.0040364			620.95	2.45e-05			620.95	2.16e-05			620.95	0.0008196			620.95	0.0033809			620.95	1.95e-05			620.95	0.0008062			620.95	0.0023239			620.95	1.8e-05
621.95	2.27e-05			621.95	0.0040928			621.95	2.44e-05			621.95	2.15e-05			621.95	0.0008168			621.95	0.0032803			621.95	1.95e-05			621.95	0.0008013			621.95	0.0023466			621.95	1.8e-05
622.95	2.26e-05			622.95	0.0041506			622.95	2.44e-05			622.95	2.15e-05			622.95	0.0008141			622.95	0.0031779			622.95	1.94e-05			622.95	0.0007964			622.95	0.0023694			622.95	1.8e-05
623.95	2.25e-05			623.95	0.0042093			623.95	2.43e-05			623.95	2.14e-05			623.95	0.0008116			623.95	0.0030742			623.95	1.93e-05			623.95	0.0007913			623.95	0.0023923			623.95	1.8e-05
624.95	2.24e-05			624.95	0.0042687			624.95	2.42e-05			624.95	2.13e-05			624.95	0.0008093			624.95	0.0029697			624.95	1.93e-05			624.95	0.0007861			624.95	0.0024154			624.95	1.81e-05
625.95	2.24e-05			625.95	0.0043282			625.95	2.41e-05			625.95	2.13e-05			625.95	0.0008071			625.95	0.0028647			625.95	1.92e-05			625.95	0.0007809			625.95	0.0024385			625.95	1.81e-05
626.95	2.23e-05			626.95	0.0043875			626.95	2.4e-05			626.95	2.12e-05			626.95	0.0008052			626.95	0.0027597			626.95	1.92e-05			626.95	0.0007755			626.95	0.0024618			626.95	1.81e-05
627.95	2.22e-05			627.95	0.004446			627.95	2.4e-05			627.95	2.11e-05			627.95	0.0008034			627.95	0.0026548			627.95	1.91e-05			627.95	0.0007701			627.95	0.0024852			627.95	1.8e-05
628.95	2.21e-05			628.95	0.0045033			628.95	2.39e-05			628.95	2.11e-05			628.95	0.0008018			628.95	0.0025505			628.95	1.91e-05			628.95	0.0007647			628.95	0.0025086			628.95	1.8e-05
629.95	2.21e-05			629.95	0.0045586			629.95	2.38e-05			629.95	2.1e-05			629.95	0.0008004			629.95	0.002447			629.95	1.9e-05			629.95	0.0007591			629.95	0.0025322			629.95	1.8e-05
630.95	2.2e-05			630.95	0.0046115			630.95	2.37e-05			630.95	2.09e-05			630.95	0.0007992			630.95	0.0023445			630.95	1.9e-05			630.95	0.0007535			630.95	0.0025558			630.95	1.8e-05
631.95	2.19e-05			631.95	0.0046613			631.95	2.37e-05			631.95	2.09e-05			631.95	0.0007982			631.95	0.0022433			631.95	1.89e-05			631.95	0.0007479			631.95	0.0025795			631.95	1.8e-05
632.95	2.19e-05			632.95	0.0047075			632.95	2.36e-05			632.95	2.08e-05			632.95	0.0007973			632.95	0.0021435			632.95	1.88e-05			632.95	0.0007422			632.95	0.0026033			632.95	1.79e-05
633.95	2.18e-05			633.95	0.0047496			633.95	2.35e-05			633.95	2.08e-05			633.95	0.0007967			633.95	0.0020453			633.95	1.88e-05			633.95	0.0007365			633.95	0.0026272			633.95	1.79e-05
634.95	2.17e-05			634.95	0.004787			634.95	2.34e-05			634.95	2.07e-05			634.95	0.0007962			634.95	0.0019489			634.95	1.87e-05			634.95	0.0007308			634.95	0.0026511			634.95	1.79e-05
635.95	2.17e-05			635.95	0.0048193			635.95	2.33e-05			635.95	2.06e-05			635.95	0.000796			635.95	0.0018543			635.95	1.87e-05			635.95	0.000725			635.95	0.0026751			635.95	1.78e-05
636.95	2.16e-05			636.95	0.0048461			636.95	2.33e-05			636.95	2.06e-05			636.95	0.0007959			636.95	0.0017617			636.95	1.86e-05			636.95	0.0007192			636.95	0.0026991			636.95	1.78e-05
637.95	2.15e-05			637.95	0.004867			637.95	2.32e-05			637.95	2.05e-05			637.95	0.000796			637.95	0.0016712			637.95	1.86e-05			637.95	0.0007134			637.95	0.0027232			637.95	1.77e-05
638.95	2.15e-05			638.95	0.0048818			638.95	2.31e-05			638.95	2.04e-05			638.95	0.0007963			638.95	0.0015829			638.95	1.85e-05			638.95	0.0007076			638.95	0.0027472			638.95	1.77e-05
639.95	2.14e-05			639.95	0.0048903			639.95	2.3e-05			639.95	2.04e-05			639.95	0.0007968			639.95	0.0014968			639.95	1.85e-05			639.95	0.0007018			639.95	0.0027713			639.95	1.76e-05
640.95	2.13e-05			640.95	0.0048922			640.95	2.3e-05			640.95	2.03e-05			640.95	0.0007974			640.95	0.0014131			640.95	1.84e-05			640.95	0.0006961			640.95	0.0027953			640.95	1.76e-05
641.95	2.12e-05			641.95	0.0048876			641.95	2.29e-05			641.95	2.03e-05			641.95	0.0007983			641.95	0.0013318			641.95	1.84e-05			641.95	0.0006903			641.95	0.0028194			641.95	1.76e-05
642.95	2.12e-05			642.95	0.0048764			642.95	2.28e-05			642.95	2.02e-05			642.95	0.0007993			642.95	0.001253			642.95	1.83e-05			642.95	0.0006845			642.95	0.0028433			642.95	1.75e-05
643.95	2.11e-05			643.95	0.0048586			643.95	2.28e-05			643.95	2.01e-05			643.95	0.0008005			643.95	0.0011768			643.95	1.83e-05			643.95	0.0006788			643.95	0.0028673			643.95	1.75e-05
644.95	2.1e-05			644.95	0.0048342			644.95	2.27e-05			644.95	2.01e-05			644.95	0.0008018			644.95	0.0011033			644.95	1.82e-05			644.95	0.000673			644.95	0.0028911			644.95	1.74e-05
645.95	2.1e-05			645.95	0.0048034			645.95	2.26e-05			645.95	2e-05			645.95	0.0008033			645.95	0.0010326			645.95	1.82e-05			645.95	0.0006673			645.95	0.0029148			645.95	1.74e-05
646.95	2.09e-05			646.95	0.0047663			646.95	2.25e-05			646.95	1.99e-05			646.95	0.0008049			646.95	0.0009648			646.95	1.81e-05			646.95	0.0006617			646.95	0.0029385			646.95	1.73e-05
647.95	2.09e-05			647.95	0.004723			647.95	2.25e-05			647.95	1.99e-05			647.95	0.0008067			647.95	0.0009			647.95	1.81e-05			647.95	0.0006561			647.95	0.002962			647.95	1.73e-05
648.95	2.08e-05			648.95	0.0046736			648.95	2.24e-05			648.95	1.98e-05			648.95	0.0008086			648.95	0.0008384			648.95	1.8e-05			648.95	0.0006505			648.95	0.0029853			648.95	1.72e-05
649.95	2.07e-05			649.95	0.0046184			649.95	2.23e-05			649.95	1.98e-05			649.95	0.0008107			649.95	0.00078			649.95	1.8e-05			649.95	0.000645			649.95	0.0030085			649.95	1.72e-05
650.95	2.07e-05			650.95	0.0045576			650.95	2.22e-05			650.95	1.97e-05			650.95	0.0008129			650.95	0.000725			650.95	1.79e-05			650.95	0.0006395			650.95	0.0030315			650.95	1.71e-05
651.95	2.06e-05			651.95	0.0044914			651.95	2.22e-05			651.95	1.96e-05			651.95	0.0008152			651.95	0.0006733			651.95	1.79e-05			651.95	0.0006341			651.95	0.0030543			651.95	1.71e-05
652.95	2.05e-05			652.95	0.0044201			652.95	2.21e-05			652.95	1.96e-05			652.95	0.0008176			652.95	0.0006251			652.95	1.78e-05			652.95	0.0006288			652.95	0.0030769			652.95	1.71e-05
653.95	2.05e-05			653.95	0.0043441			653.95	2.2e-05			653.95	1.95e-05			653.95	0.0008201			653.95	0.0005804			653.95	1.78e-05			653.95	0.0006235			653.95	0.0030993			653.95	1.7e-05
654.95	2.04e-05			654.95	0.0042635			654.95	2.2e-05			654.95	1.95e-05			654.95	0.0008227			654.95	0.0005389			654.95	1.77e-05			654.95	0.0006183			654.95	0.0031215			654.95	1.7e-05
655.95	2.03e-05			655.95	0.0041789			655.95	2.19e-05			655.95	1.94e-05			655.95	0.0008254			655.95	0.0005008			655.95	1.77e-05			655.95	0.0006131			655.95	0.0031434			655.95	1.69e-05
656.95	2.03e-05			656.95	0.0040905			656.95	2.18e-05			656.95	1.94e-05			656.95	0.0008282			656.95	0.0004657			656.95	1.76e-05			656.95	0.0006081			656.95	0.0031652			656.95	1.69e-05
657.95	2.02e-05			657.95	0.0039988			657.95	2.18e-05			657.95	1.93e-05			657.95	0.0008311			657.95	0.0004337			657.95	1.76e-05			657.95	0.0006031			657.95	0.0031867			657.95	1.68e-05
658.95	2.02e-05			658.95	0.0039042			658.95	2.17e-05			658.95	1.92e-05			658.95	0.000834			658.95	0.0004043			658.95	1.75e-05			658.95	0.0005982			658.95	0.0032081			658.95	1.68e-05
659.95	2.01e-05			659.95	0.0038071			659.95	2.16e-05			659.95	1.92e-05			659.95	0.000837			659.95	0.0003775			659.95	1.75e-05			659.95	0.0005934			659.95	0.0032294			659.95	1.67e-05
660.95	2e-05			660.95	0.003708			660.95	2.16e-05			660.95	1.91e-05			660.95	0.00084			660.95	0.0003531			660.95	1.74e-05			660.95	0.0005886			660.95	0.0032507			660.95	1.67e-05
661.95	2e-05			661.95	0.0036073			661.95	2.15e-05			661.95	1.91e-05			661.95	0.000843			661.95	0.0003306			661.95	1.74e-05			661.95	0.000584			661.95	0.0032719			661.95	1.67e-05
662.95	1.99e-05			662.95	0.0035053			662.95	2.14e-05			662.95	1.9e-05			662.95	0.0008461			662.95	0.0003101			662.95	1.73e-05			662.95	0.0005795			662.95	0.0032932			662.95	1.66e-05
663.95	1.98e-05			663.95	0.0034025			663.95	2.14e-05			663.95	1.9e-05			663.95	0.0008491			663.95	0.0002911			663.95	1.73e-05			663.95	0.000575			663.95	0.0033148			663.95	1.66e-05
664.95	1.98e-05			664.95	0.0032991			664.95	2.13e-05			664.95	1.89e-05			664.95	0.0008522			664.95	0.0002736			664.95	1.72e-05			664.95	0.0005707			664.95	0.0033366			664.95	1.65e-05
665.95	1.97e-05			665.95	0.0031956			665.95	2.12e-05			665.95	1.88e-05			665.95	0.0008553			665.95	0.0002573			665.95	1.72e-05			665.95	0.0005664			665.95	0.0033589			665.95	1.65e-05
666.95	1.97e-05			666.95	0.0030921			666.95	2.12e-05			666.95	1.88e-05			666.95	0.0008583			666.95	0.0002421			666.95	1.71e-05			666.95	0.0005623			666.95	0.0033818			666.95	1.64e-05
667.95	1.96e-05			667.95	0.0029889			667.95	2.11e-05			667.95	1.87e-05			667.95	0.0008613			667.95	0.0002277			667.95	1.71e-05			667.95	0.0005582			667.95	0.0034055			667.95	1.64e-05
668.95	1.95e-05			668.95	0.0028862			668.95	2.1e-05			668.95	1.87e-05			668.95	0.0008643			668.95	0.0002142			668.95	1.7e-05			668.95	0.0005543			668.95	0.00343			668.95	1.64e-05
669.95	1.95e-05			669.95	0.0027843			669.95	2.1e-05			669.95	1.86e-05			669.95	0.0008673			669.95	0.0002013			669.95	1.7e-05			669.95	0.0005505			669.95	0.0034556			669.95	1.63e-05
670.95	1.94e-05			670.95	0.0026832			670.95	2.09e-05			670.95	1.86e-05			670.95	0.0008702			670.95	0.0001889			670.95	1.69e-05			670.95	0.0005467			670.95	0.0034824			670.95	1.63e-05
671.95	1.94e-05			671.95	0.0025832			671.95	2.08e-05			671.95	1.85e-05			671.95	0.000873			671.95	0.0001771			671.95	1.69e-05			671.95	0.0005431			671.95	0.0035105			671.95	1.62e-05
672.95	1.93e-05			672.95	0.0024844			672.95	2.08e-05			672.95	1.85e-05			672.95	0.0008757			672.95	0.0001656			672.95	1.69e-05			672.95	0.0005395			672.95	0.0035401			672.95	1.62e-05
673.95	1.93e-05			673.95	0.0023869			673.95	2.07e-05			673.95	1.84e-05			673.95	0.0008784			673.95	0.0001546			673.95	1.68e-05			673.95	0.0005361			673.95	0.0035713			673.95	1.61e-05
674.95	1.92e-05			674.95	0.0022908			674.95	2.06e-05			674.95	1.83e-05			674.95	0.000881			674.95	0.0001439			674.95	1.68e-05			674.95	0.0005328			674.95	0.0036041			674.95	1.61e-05
675.95	1.91e-05			675.95	0.0021963			675.95	2.06e-05			675.95	1.83e-05			675.95	0.0008834			675.95	0.0001335			675.95	1.67e-05			675.95	0.0005295			675.95	0.0036387			675.95	1.61e-05
676.95	1.91e-05			676.95	0.0021035			676.95	2.05e-05			676.95	1.82e-05			676.95	0.0008858			676.95	0.0001234			676.95	1.67e-05			676.95	0.0005264			676.95	0.003675			676.95	1.6e-05
677.95	1.9e-05			677.95	0.0020125			677.95	2.04e-05			677.95	1.82e-05			677.95	0.000888			677.95	0.0001137			677.95	1.66e-05			677.95	0.0005233			677.95	0.003713			677.95	1.6e-05
678.95	1.9e-05			678.95	0.0019233			678.95	2.04e-05			678.95	1.81e-05			678.95	0.0008901			678.95	0.0001043			678.95	1.66e-05			678.95	0.0005204			678.95	0.0037528			678.95	1.59e-05
679.95	1.89e-05			679.95	0.0018361			679.95	2.03e-05			679.95	1.81e-05			679.95	0.0008921			679.95	9.53e-05			679.95	1.65e-05			679.95	0.0005175			679.95	0.0037943			679.95	1.59e-05
680.95	1.89e-05			680.95	0.001751			680.95	2.03e-05			680.95	1.8e-05			680.95	0.0008939			680.95	8.68e-05			680.95	1.65e-05			680.95	0.0005147			680.95	0.0038375			680.95	1.59e-05
681.95	1.88e-05			681.95	0.0016679			681.95	2.02e-05			681.95	1.8e-05			681.95	0.0008956			681.95	7.87e-05			681.95	1.65e-05			681.95	0.000512			681.95	0.0038823			681.95	1.58e-05
682.95	1.87e-05			682.95	0.001587			682.95	2.01e-05			682.95	1.79e-05			682.95	0.0008971			682.95	7.11e-05			682.95	1.64e-05			682.95	0.0005094			682.95	0.0039286			682.95	1.58e-05
683.95	1.87e-05			683.95	0.0015083			683.95	2.01e-05			683.95	1.79e-05			683.95	0.0008984			683.95	6.41e-05			683.95	1.64e-05			683.95	0.0005069			683.95	0.0039764			683.95	1.57e-05
684.95	1.86e-05			684.95	0.0014319			684.95	2e-05			684.95	1.78e-05			684.95	0.0008996			684.95	5.77e-05			684.95	1.63e-05			684.95	0.0005044			684.95	0.0040256			684.95	1.57e-05
685.95	1.86e-05			685.95	0.0013578			685.95	1.99e-05			685.95	1.78e-05			685.95	0.0009005			685.95	5.19e-05			685.95	1.63e-05			685.95	0.000502			685.95	0.0040762			685.95	1.57e-05
686.95	1.85e-05			686.95	0.0012861			686.95	1.99e-05			686.95	1.77e-05			686.95	0.0009012			686.95	4.67e-05			686.95	1.62e-05			686.95	0.0004997			686.95	0.0041281			686.95	1.56e-05
687.95	1.85e-05			687.95	0.0012167			687.95	1.98e-05			687.95	1.77e-05			687.95	0.0009017			687.95	4.21e-05			687.95	1.62e-05			687.95	0.0004974			687.95	0.0041813			687.95	1.56e-05
688.95	1.84e-05			688.95	0.0011496			688.95	1.98e-05			688.95	1.76e-05			688.95	0.000902			688.95	3.8e-05			688.95	1.61e-05			688.95	0.0004952			688.95	0.0042357			688.95	1.55e-05
689.95	1.84e-05			689.95	0.001085			689.95	1.97e-05			689.95	1.76e-05			689.95	0.0009021			689.95	3.45e-05			689.95	1.61e-05			689.95	0.000493			689.95	0.0042914			689.95	1.55e-05
690.95	1.83e-05			690.95	0.0010228			690.95	1.96e-05			690.95	1.75e-05			690.95	0.0009018			690.95	3.15e-05			690.95	1.61e-05			690.95	0.0004909			690.95	0.0043484			690.95	1.55e-05
691.95	1.83e-05			691.95	0.0009631			691.95	1.96e-05			691.95	1.75e-05			691.95	0.0009014			691.95	2.9e-05			691.95	1.6e-05			691.95	0.0004888			691.95	0.0044067			691.95	1.54e-05
692.95	1.82e-05			692.95	0.0009058			692.95	1.95e-05			692.95	1.74e-05			692.95	0.0009006			692.95	2.68e-05			692.95	1.6e-05			692.95	0.0004868			692.95	0.0044663			692.95	1.54e-05
693.95	1.81e-05			693.95	0.0008512			693.95	1.95e-05			693.95	1.74e-05			693.95	0.0008996			693.95	2.5e-05			693.95	1.59e-05			693.95	0.0004848			693.95	0.0045274			693.95	1.53e-05
694.95	1.81e-05			694.95	0.0007992			694.95	1.94e-05			694.95	1.73e-05			694.95	0.0008983			694.95	2.35e-05			694.95	1.59e-05			694.95	0.0004828			694.95	0.0045898			694.95	1.53e-05
695.95	1.8e-05			695.95	0.0007498			695.95	1.94e-05			695.95	1.73e-05			695.95	0.0008968			695.95	2.22e-05			695.95	1.59e-05			695.95	0.0004808			695.95	0.0046537			695.95	1.53e-05
696.95	1.8e-05			696.95	0.0007032			696.95	1.93e-05			696.95	1.72e-05			696.95	0.0008949			696.95	2.12e-05			696.95	1.58e-05			696.95	0.0004789			696.95	0.0047189			696.95	1.52e-05
697.95	1.79e-05			697.95	0.0006594			697.95	1.92e-05			697.95	1.72e-05			697.95	0.0008927			697.95	2.04e-05			697.95	1.58e-05			697.95	0.0004769			697.95	0.0047856			697.95	1.52e-05
698.95	1.79e-05			698.95	0.0006182			698.95	1.92e-05			698.95	1.71e-05			698.95	0.0008902			698.95	1.98e-05			698.95	1.57e-05			698.95	0.000475			698.95	0.0048537			698.95	1.52e-05
699.95	1.78e-05			699.95	0.0005798			699.95	1.91e-05			699.95	1.71e-05			699.95	0.0008873			699.95	1.92e-05			699.95	1.57e-05			699.95	0.0004731			699.95	0.0049231			699.95	1.51e-05
700.95	1.78e-05			700.95	0.0005441			700.95	1.91e-05			700.95	1.7e-05			700.95	0.0008841			700.95	1.88e-05			700.95	1.56e-05			700.95	0.0004711			700.95	0.0049938			700.95	1.51e-05
701.95	1.77e-05			701.95	0.0005109			701.95	1.9e-05			701.95	1.7e-05			701.95	0.0008806			701.95	1.85e-05			701.95	1.56e-05			701.95	0.0004691			701.95	0.0050658			701.95	1.5e-05
702.95	1.77e-05			702.95	0.0004802			702.95	1.9e-05			702.95	1.69e-05			702.95	0.0008768			702.95	1.83e-05			702.95	1.56e-05			702.95	0.0004671			702.95	0.0051389			702.95	1.5e-05
703.95	1.76e-05			703.95	0.0004518			703.95	1.89e-05			703.95	1.69e-05			703.95	0.0008725			703.95	1.81e-05			703.95	1.55e-05			703.95	0.0004651			703.95	0.0052132			703.95	1.5e-05
704.95	1.76e-05			704.95	0.0004255			704.95	1.88e-05			704.95	1.68e-05			704.95	0.0008679			704.95	1.8e-05			704.95	1.55e-05			704.95	0.000463			704.95	0.0052885			704.95	1.49e-05
705.95	1.75e-05			705.95	0.0004012			705.95	1.88e-05			705.95	1.68e-05			705.95	0.000863			705.95	1.8e-05			705.95	1.54e-05			705.95	0.0004609			705.95	0.0053646			705.95	1.49e-05
706.95	1.75e-05			706.95	0.0003788			706.95	1.87e-05			706.95	1.68e-05			706.95	0.0008576			706.95	1.79e-05			706.95	1.54e-05			706.95	0.0004587			706.95	0.0054415			706.95	1.49e-05
707.95	1.74e-05			707.95	0.0003581			707.95	1.87e-05			707.95	1.67e-05			707.95	0.0008519			707.95	1.8e-05			707.95	1.54e-05			707.95	0.0004565			707.95	0.005519			707.95	1.48e-05
708.95	1.74e-05			708.95	0.0003388			708.95	1.86e-05			708.95	1.67e-05			708.95	0.0008458			708.95	1.8e-05			708.95	1.53e-05			708.95	0.0004542			708.95	0.005597			708.95	1.48e-05
709.95	1.73e-05			709.95	0.0003209			709.95	1.86e-05			709.95	1.66e-05			709.95	0.0008392			709.95	1.81e-05			709.95	1.53e-05			709.95	0.0004519			709.95	0.0056752			709.95	1.47e-05
710.95	1.73e-05			710.95	0.0003042			710.95	1.85e-05			710.95	1.66e-05			710.95	0.0008323			710.95	1.81e-05			710.95	1.52e-05			710.95	0.0004494			710.95	0.0057533			710.95	1.47e-05
711.95	1.72e-05			711.95	0.0002886			711.95	1.85e-05			711.95	1.65e-05			711.95	0.0008249			711.95	1.82e-05			711.95	1.52e-05			711.95	0.0004469			711.95	0.0058313			711.95	1.47e-05
712.95	1.72e-05			712.95	0.0002739			712.95	1.84e-05			712.95	1.65e-05			712.95	0.0008171			712.95	1.84e-05			712.95	1.52e-05			712.95	0.0004443			712.95	0.0059088			712.95	1.46e-05
713.95	1.71e-05			713.95	0.0002601			713.95	1.84e-05			713.95	1.64e-05			713.95	0.0008088			713.95	1.85e-05			713.95	1.51e-05			713.95	0.0004416			713.95	0.0059854			713.95	1.46e-05
714.95	1.71e-05			714.95	0.000247			714.95	1.83e-05			714.95	1.64e-05			714.95	0.0008002			714.95	1.86e-05			714.95	1.51e-05			714.95	0.0004388			714.95	0.006061			714.95	1.46e-05
715.95	1.7e-05			715.95	0.0002346			715.95	1.82e-05			715.95	1.63e-05			715.95	0.000791			715.95	1.88e-05			715.95	1.51e-05			715.95	0.0004359			715.95	0.0061351			715.95	1.45e-05
716.95	1.7e-05			716.95	0.0002226			716.95	1.82e-05			716.95	1.63e-05			716.95	0.0007814			716.95	1.89e-05			716.95	1.5e-05			716.95	0.0004328			716.95	0.0062075			716.95	1.45e-05
717.95	1.69e-05			717.95	0.0002112			717.95	1.81e-05			717.95	1.63e-05			717.95	0.0007713			717.95	1.91e-05			717.95	1.5e-05			717.95	0.0004297			717.95	0.0062779			717.95	1.45e-05
718.95	1.69e-05			718.95	0.0002002			718.95	1.81e-05			718.95	1.62e-05			718.95	0.0007608			718.95	1.92e-05			718.95	1.49e-05			718.95	0.0004264			718.95	0.006346			718.95	1.44e-05
719.95	1.68e-05			719.95	0.0001894			719.95	1.8e-05			719.95	1.62e-05			719.95	0.0007497			719.95	1.94e-05			719.95	1.49e-05			719.95	0.000423			719.95	0.0064116			719.95	1.44e-05
720.95	1.68e-05			720.95	0.000179			720.95	1.8e-05			720.95	1.61e-05			720.95	0.0007382			720.95	1.96e-05			720.95	1.49e-05			720.95	0.0004195			720.95	0.0064744			720.95	1.44e-05
721.95	1.68e-05			721.95	0.0001687			721.95	1.79e-05			721.95	1.61e-05			721.95	0.0007261			721.95	1.97e-05			721.95	1.48e-05			721.95	0.0004159			721.95	0.0065342			721.95	1.43e-05
722.95	1.67e-05			722.95	0.0001586			722.95	1.79e-05			722.95	1.6e-05			722.95	0.0007136			722.95	1.99e-05			722.95	1.48e-05			722.95	0.0004121			722.95	0.0065909			722.95	1.43e-05
723.95	1.67e-05			723.95	0.0001486			723.95	1.78e-05			723.95	1.6e-05			723.95	0.0007005			723.95	2.01e-05			723.95	1.48e-05			723.95	0.0004082			723.95	0.0066443			723.95	1.43e-05
724.95	1.66e-05			724.95	0.0001388			724.95	1.78e-05			724.95	1.59e-05			724.95	0.0006869			724.95	2.02e-05			724.95	1.47e-05			724.95	0.0004041			724.95	0.0066942			724.95	1.42e-05
725.95	1.66e-05			725.95	0.000129			725.95	1.77e-05			725.95	1.59e-05			725.95	0.0006728			725.95	2.04e-05			725.95	1.47e-05			725.95	0.0003999			725.95	0.0067406			725.95	1.42e-05
726.95	1.65e-05			726.95	0.0001195			726.95	1.77e-05			726.95	1.59e-05			726.95	0.0006581			726.95	2.05e-05			726.95	1.46e-05			726.95	0.0003955			726.95	0.0067833			726.95	1.42e-05
727.95	1.65e-05			727.95	0.0001101			727.95	1.76e-05			727.95	1.58e-05			727.95	0.0006428			727.95	2.07e-05			727.95	1.46e-05			727.95	0.000391			727.95	0.0068224			727.95	1.41e-05
728.95	1.64e-05			728.95	0.000101			728.95	1.76e-05			728.95	1.58e-05			728.95	0.000627			728.95	2.08e-05			728.95	1.46e-05			728.95	0.0003864			728.95	0.0068578			728.95	1.41e-05
729.95	1.64e-05			729.95	9.22e-05			729.95	1.75e-05			729.95	1.57e-05			729.95	0.0006107			729.95	2.1e-05			729.95	1.45e-05			729.95	0.0003816			729.95	0.0068899			729.95	1.41e-05
730.95	1.63e-05			730.95	8.38e-05			730.95	1.75e-05			730.95	1.57e-05			730.95	0.0005937			730.95	2.11e-05			730.95	1.45e-05			730.95	0.0003766			730.95	0.0069186			730.95	1.4e-05
731.95	1.63e-05			731.95	7.58e-05			731.95	1.74e-05			731.95	1.57e-05			731.95	0.0005762			731.95	2.13e-05			731.95	1.45e-05			731.95	0.0003715			731.95	0.006944			731.95	1.4e-05
732.95	1.62e-05			732.95	6.82e-05			732.95	1.74e-05			732.95	1.56e-05			732.95	0.000558			732.95	2.14e-05			732.95	1.44e-05			732.95	0.0003662			732.95	0.0069663			732.95	1.4e-05
733.95	1.62e-05			733.95	6.12e-05			733.95	1.73e-05			733.95	1.56e-05			733.95	0.0005393			733.95	2.15e-05			733.95	1.44e-05			733.95	0.0003608			733.95	0.0069852			733.95	1.39e-05
734.95	1.62e-05			734.95	5.46e-05			734.95	1.73e-05			734.95	1.55e-05			734.95	0.0005199			734.95	2.16e-05			734.95	1.44e-05			734.95	0.0003553			734.95	0.0070004			734.95	1.39e-05
735.95	1.61e-05			735.95	4.85e-05			735.95	1.72e-05			735.95	1.55e-05			735.95	0.0004999			735.95	2.17e-05			735.95	1.43e-05			735.95	0.0003496			735.95	0.0070118			735.95	1.39e-05
736.95	1.61e-05			736.95	4.3e-05			736.95	1.72e-05			736.95	1.54e-05			736.95	0.0004793			736.95	2.18e-05			736.95	1.43e-05			736.95	0.0003437			736.95	0.0070194			736.95	1.38e-05
737.95	1.6e-05			737.95	3.79e-05			737.95	1.71e-05			737.95	1.54e-05			737.95	0.0004581			737.95	2.19e-05			737.95	1.43e-05			737.95	0.0003377			737.95	0.0070234			737.95	1.38e-05
738.95	1.6e-05			738.95	3.34e-05			738.95	1.71e-05			738.95	1.54e-05			738.95	0.0004362			738.95	2.19e-05			738.95	1.42e-05			738.95	0.0003316			738.95	0.0070238			738.95	1.38e-05
739.95	1.59e-05			739.95	2.93e-05			739.95	1.7e-05			739.95	1.53e-05			739.95	0.0004136			739.95	2.2e-05			739.95	1.42e-05			739.95	0.0003253			739.95	0.0070209			739.95	1.37e-05
740.95	1.59e-05			740.95	2.56e-05			740.95	1.7e-05			740.95	1.53e-05			740.95	0.0003904			740.95	2.2e-05			740.95	1.42e-05			740.95	0.0003189			740.95	0.0070149			740.95	1.37e-05
741.95	1.59e-05			741.95	2.23e-05			741.95	1.69e-05			741.95	1.52e-05			741.95	0.0003664			741.95	2.21e-05			741.95	1.41e-05			741.95	0.0003123			741.95	0.007006			741.95	1.37e-05
742.95	1.58e-05			742.95	1.94e-05			742.95	1.69e-05			742.95	1.52e-05			742.95	0.0003417			742.95	2.21e-05			742.95	1.41e-05			742.95	0.0003056			742.95	0.0069944			742.95	1.36e-05
743.95	1.58e-05			743.95	1.69e-05			743.95	1.69e-05			743.95	1.52e-05			743.95	0.0003161			743.95	2.21e-05			743.95	1.4e-05			743.95	0.0002988			743.95	0.0069803			743.95	1.36e-05
744.95	1.57e-05			744.95	1.46e-05			744.95	1.68e-05			744.95	1.51e-05			744.95	0.0002897			744.95	2.21e-05			744.95	1.4e-05			744.95	0.0002919			744.95	0.006964			744.95	1.36e-05
745.95	1.57e-05			745.95	1.25e-05			745.95	1.68e-05			745.95	1.51e-05			745.95	0.0002624			745.95	2.21e-05			745.95	1.4e-05			745.95	0.0002848			745.95	0.0069456			745.95	1.35e-05
746.95	1.56e-05			746.95	1.08e-05			746.95	1.67e-05			746.95	1.5e-05			746.95	0.0002341			746.95	2.21e-05			746.95	1.39e-05			746.95	0.0002776			746.95	0.0069252			746.95	1.35e-05
747.95	1.56e-05			747.95	9.2e-06			747.95	1.67e-05			747.95	1.5e-05			747.95	0.0002047			747.95	2.21e-05			747.95	1.39e-05			747.95	0.0002703			747.95	0.0069028			747.95	1.35e-05
748.95	1.56e-05			748.95	7.8e-06			748.95	1.66e-05			748.95	1.5e-05			748.95	0.0001743			748.95	2.21e-05			748.95	1.39e-05			748.95	0.0002629			748.95	0.0068785			748.95	1.34e-05
749.95	1.55e-05			749.95	6.5e-06			749.95	1.66e-05			749.95	1.49e-05			749.95	0.0001429			749.95	2.2e-05			749.95	1.38e-05			749.95	0.0002554			749.95	0.0068525			749.95	1.34e-05
750.95	1.55e-05			750.95	5.4e-06			750.95	1.65e-05			750.95	1.49e-05			750.95	0.0001103			750.95	2.2e-05			750.95	1.38e-05			750.95	0.0002478			750.95	0.006825			750.95	1.34e-05
751.95	1.54e-05			751.95	4.5e-06			751.95	1.65e-05			751.95	1.49e-05			751.95	7.66e-05			751.95	2.19e-05			751.95	1.38e-05			751.95	0.00024			751.95	0.0067959			751.95	1.33e-05
752.95	1.54e-05			752.95	3.6e-06			752.95	1.64e-05			752.95	1.48e-05			752.95	4.19e-05			752.95	2.18e-05			752.95	1.37e-05			752.95	0.0002322			752.95	0.0067653			752.95	1.33e-05
753.95	1.54e-05			753.95	2.8e-06			753.95	1.64e-05			753.95	1.48e-05			753.95	6.1e-06			753.95	2.17e-05			753.95	1.37e-05			753.95	0.0002243			753.95	0.0067335			753.95	1.33e-05
754.95	1.53e-05			754.95	2.1e-06			754.95	1.63e-05			754.95	1.47e-05			754.95	-3.08e-05			754.95	2.16e-05			754.95	1.37e-05			754.95	0.0002163			754.95	0.0067006			754.95	1.33e-05
755.95	1.53e-05			755.95	1.5e-06			755.95	1.63e-05			755.95	1.47e-05			755.95	-6.87e-05			755.95	2.15e-05			755.95	1.37e-05			755.95	0.0002082			755.95	0.0066668			755.95	1.32e-05
756.95	1.52e-05			756.95	1e-06			756.95	1.63e-05			756.95	1.47e-05			756.95	-0.0001074			756.95	2.14e-05			756.95	1.36e-05			756.95	0.0002001			756.95	0.0066323			756.95	1.32e-05
757.95	1.52e-05			757.95	5e-07			757.95	1.62e-05			757.95	1.46e-05			757.95	-0.000147			757.95	2.12e-05			757.95	1.36e-05			757.95	0.0001918			757.95	0.0065972			757.95	1.32e-05
758.95	1.52e-05			758.95	1e-07			758.95	1.62e-05			758.95	1.46e-05			758.95	-0.0001873			758.95	2.11e-05			758.95	1.36e-05			758.95	0.0001835			758.95	0.0065618			758.95	1.31e-05
759.95	1.51e-05			759.95	-2e-07			759.95	1.61e-05			759.95	1.46e-05			759.95	-0.0002282			759.95	2.1e-05			759.95	1.35e-05			759.95	0.0001751			759.95	0.0065261			759.95	1.31e-05
760.95	1.51e-05			760.95	-6e-07			760.95	1.61e-05			760.95	1.45e-05			760.95	-0.0002695			760.95	2.08e-05			760.95	1.35e-05			760.95	0.0001667			760.95	0.0064904			760.95	1.31e-05
761.95	1.5e-05			761.95	-9e-07			761.95	1.6e-05			761.95	1.45e-05			761.95	-0.0003112			761.95	2.07e-05			761.95	1.35e-05			761.95	0.0001582			761.95	0.0064547			761.95	1.3e-05
762.95	1.5e-05			762.95	-1.1e-06			762.95	1.6e-05			762.95	1.44e-05			762.95	-0.000353			762.95	2.05e-05			762.95	1.34e-05			762.95	0.0001497			762.95	0.006419			762.95	1.3e-05
763.95	1.5e-05			763.95	-1.3e-06			763.95	1.6e-05			763.95	1.44e-05			763.95	-0.0003948			763.95	2.03e-05			763.95	1.34e-05			763.95	0.000141			763.95	0.0063836			763.95	1.3e-05
764.95	1.49e-05			764.95	-1.5e-06			764.95	1.59e-05			764.95	1.44e-05			764.95	-0.0004363			764.95	2.02e-05			764.95	1.34e-05			764.95	0.0001324			764.95	0.0063483			764.95	1.3e-05
765.95	1.49e-05			765.95	-1.6e-06			765.95	1.59e-05			765.95	1.43e-05			765.95	-0.0004776			765.95	2e-05			765.95	1.33e-05			765.95	0.0001237			765.95	0.0063134			765.95	1.29e-05
766.95	1.48e-05			766.95	-1.8e-06			766.95	1.58e-05			766.95	1.43e-05			766.95	-0.0005183			766.95	1.99e-05			766.95	1.33e-05			766.95	0.0001149			766.95	0.0062791			766.95	1.29e-05
767.95	1.48e-05			767.95	-1.9e-06			767.95	1.58e-05			767.95	1.43e-05			767.95	-0.0005583			767.95	1.98e-05			767.95	1.33e-05			767.95	0.0001062			767.95	0.0062451			767.95	1.29e-05
768.95	1.48e-05			768.95	-2e-06			768.95	1.57e-05			768.95	1.42e-05			768.95	-0.0005975			768.95	1.96e-05			768.95	1.32e-05			768.95	9.74e-05			768.95	0.0062117			768.95	1.28e-05
769.95	1.47e-05			769.95	-2e-06			769.95	1.57e-05			769.95	1.42e-05			769.95	-0.0006356			769.95	1.95e-05			769.95	1.32e-05			769.95	8.85e-05			769.95	0.0061786			769.95	1.28e-05
770.95	1.47e-05			770.95	-2.1e-06			770.95	1.57e-05			770.95	1.42e-05			770.95	-0.0006727			770.95	1.94e-05			770.95	1.32e-05			770.95	7.96e-05			770.95	0.0061459			770.95	1.28e-05
771.95	1.47e-05			771.95	-2.1e-06			771.95	1.56e-05			771.95	1.41e-05			771.95	-0.0007085			771.95	1.93e-05			771.95	1.32e-05			771.95	7.07e-05			771.95	0.0061137			771.95	1.28e-05
772.95	1.46e-05			772.95	-2.1e-06			772.95	1.56e-05			772.95	1.41e-05			772.95	-0.000743			772.95	1.93e-05			772.95	1.31e-05			772.95	6.18e-05			772.95	0.0060818			772.95	1.27e-05
773.95	1.46e-05			773.95	-2.1e-06			773.95	1.55e-05			773.95	1.41e-05			773.95	-0.0007761			773.95	1.92e-05			773.95	1.31e-05			773.95	5.29e-05			773.95	0.0060503			773.95	1.27e-05
774.95	1.45e-05			774.95	-2.1e-06			774.95	1.55e-05			774.95	1.4e-05			774.95	-0.0008077			774.95	1.91e-05			774.95	1.31e-05			774.95	4.39e-05			774.95	0.0060192			774.95	1.27e-05
775.95	1.45e-05			775.95	-2.1e-06			775.95	1.55e-05			775.95	1.4e-05			775.95	-0.0008377			775.95	1.91e-05			775.95	1.3e-05			775.95	3.5e-05			775.95	0.0059884			775.95	1.26e-05
776.95	1.45e-05			776.95	-2.1e-06			776.95	1.54e-05			776.95	1.4e-05			776.95	-0.0008661			776.95	1.9e-05			776.95	1.3e-05			776.95	2.6e-05			776.95	0.005958			776.95	1.26e-05
777.95	1.44e-05			777.95	-2e-06			777.95	1.54e-05			777.95	1.39e-05			777.95	-0.0008928			777.95	1.89e-05			777.95	1.3e-05			777.95	1.7e-05			777.95	0.005928			777.95	1.26e-05
778.95	1.44e-05			778.95	-2e-06			778.95	1.53e-05			778.95	1.39e-05			778.95	-0.0009179			778.95	1.89e-05			778.95	1.29e-05			778.95	8e-06			778.95	0.0058984			778.95	1.26e-05
779.95	1.44e-05			779.95	-1.9e-06			779.95	1.53e-05			779.95	1.39e-05			779.95	-0.0009413			779.95	1.88e-05			779.95	1.29e-05			779.95	-1e-06			779.95	0.0058691			779.95	1.25e-05
780.95	1.43e-05			780.95	-1.9e-06			780.95	1.53e-05			780.95	1.38e-05			780.95	-0.000963			780.95	1.88e-05			780.95	1.29e-05			780.95	-9.9e-06			780.95	0.0058402			780.95	1.25e-05
781.95	1.43e-05			781.95	-1.8e-06			781.95	1.52e-05			781.95	1.38e-05			781.95	-0.0009831			781.95	1.87e-05			781.95	1.29e-05			781.95	-1.89e-05			781.95	0.0058115			781.95	1.25e-05
782.95	1.42e-05			782.95	-1.7e-06			782.95	1.52e-05			782.95	1.37e-05			782.95	-0.0010015			782.95	1.87e-05			782.95	1.28e-05			782.95	-2.79e-05			782.95	0.005783			782.95	1.25e-05
783.95	1.42e-05			783.95	-1.6e-06			783.95	1.51e-05			783.95	1.37e-05			783.95	-0.0010183			783.95	1.86e-05			783.95	1.28e-05			783.95	-3.68e-05			783.95	0.0057546			783.95	1.24e-05
784.95	1.42e-05			784.95	-1.5e-06			784.95	1.51e-05			784.95	1.37e-05			784.95	-0.0010335			784.95	1.86e-05			784.95	1.28e-05			784.95	-4.57e-05			784.95	0.0057264			784.95	1.24e-05
785.95	1.41e-05			785.95	-1.5e-06			785.95	1.51e-05			785.95	1.36e-05			785.95	-0.0010472			785.95	1.85e-05			785.95	1.27e-05			785.95	-5.46e-05			785.95	0.0056984			785.95	1.24e-05
786.95	1.41e-05			786.95	-1.4e-06			786.95	1.5e-05			786.95	1.36e-05			786.95	-0.0010593			786.95	1.84e-05			786.95	1.27e-05			786.95	-6.35e-05			786.95	0.0056707			786.95	1.23e-05
787.95	1.41e-05			787.95	-1.3e-06			787.95	1.5e-05			787.95	1.36e-05			787.95	-0.0010701			787.95	1.84e-05			787.95	1.27e-05			787.95	-7.23e-05			787.95	0.0056433			787.95	1.23e-05
788.95	1.4e-05			788.95	-1.1e-06			788.95	1.49e-05			788.95	1.36e-05			788.95	-0.0010795			788.95	1.83e-05			788.95	1.27e-05			788.95	-8.11e-05			788.95	0.0056162			788.95	1.23e-05
789.95	1.4e-05			789.95	-1e-06			789.95	1.49e-05			789.95	1.35e-05			789.95	-0.0010875			789.95	1.83e-05			789.95	1.26e-05			789.95	-8.98e-05			789.95	0.0055895			789.95	1.23e-05
790.95	1.4e-05			790.95	-9e-07			790.95	1.49e-05			790.95	1.35e-05			790.95	-0.0010943			790.95	1.82e-05			790.95	1.26e-05			790.95	-9.85e-05			790.95	0.0055631			790.95	1.22e-05
791.95	1.39e-05			791.95	-8e-07			791.95	1.48e-05			791.95	1.35e-05			791.95	-0.0011			791.95	1.82e-05			791.95	1.26e-05			791.95	-0.0001072			791.95	0.005537			791.95	1.22e-05
792.95	1.39e-05			792.95	-7e-07			792.95	1.48e-05			792.95	1.34e-05			792.95	-0.0011045			792.95	1.81e-05			792.95	1.25e-05			792.95	-0.0001157			792.95	0.0055112			792.95	1.22e-05
793.95	1.39e-05			793.95	-6e-07			793.95	1.47e-05			793.95	1.34e-05			793.95	-0.0011079			793.95	1.81e-05			793.95	1.25e-05			793.95	-0.0001243			793.95	0.0054857			793.95	1.22e-05
794.95	1.38e-05			794.95	-5e-07			794.95	1.47e-05			794.95	1.34e-05			794.95	-0.0011104			794.95	1.8e-05			794.95	1.25e-05			794.95	-0.0001327			794.95	0.0054604			794.95	1.21e-05
795.95	1.38e-05			795.95	-3e-07			795.95	1.47e-05			795.95	1.33e-05			795.95	-0.0011119			795.95	1.8e-05			795.95	1.25e-05			795.95	-0.0001411			795.95	0.0054355			795.95	1.21e-05
796.95	1.38e-05			796.95	-2e-07			796.95	1.46e-05			796.95	1.33e-05			796.95	-0.0011126			796.95	1.79e-05			796.95	1.24e-05			796.95	-0.0001494			796.95	0.0054108			796.95	1.21e-05
797.95	1.37e-05			797.95	-1e-07			797.95	1.46e-05			797.95	1.33e-05			797.95	-0.0011124			797.95	1.79e-05			797.95	1.24e-05			797.95	-0.0001576			797.95	0.0053865			797.95	1.21e-05
798.95	1.37e-05			798.95	1e-07			798.95	1.46e-05			798.95	1.32e-05			798.95	-0.0011115			798.95	1.78e-05			798.95	1.24e-05			798.95	-0.0001657			798.95	0.0053626			798.95	1.2e-05
799.95	1.37e-05			799.95	2e-07			799.95	1.45e-05			799.95	1.32e-05			799.95	-0.0011099			799.95	1.78e-05			799.95	1.24e-05			799.95	-0.0001737			799.95	0.0053389			799.95	1.2e-05
800.95	1.36e-05			800.95	3e-07			800.95	1.45e-05			800.95	1.32e-05			800.95	-0.0011076			800.95	1.77e-05			800.95	1.23e-05			800.95	-0.0001815			800.95	0.0053157			800.95	1.2e-05
801.95	1.36e-05			801.95	5e-07			801.95	1.45e-05			801.95	1.31e-05			801.95	-0.0011047			801.95	1.77e-05			801.95	1.23e-05			801.95	-0.0001893			801.95	0.0052929			801.95	1.2e-05
802.95	1.36e-05			802.95	6e-07			802.95	1.44e-05			802.95	1.31e-05			802.95	-0.0011013			802.95	1.76e-05			802.95	1.23e-05			802.95	-0.000197			802.95	0.0052707			802.95	1.19e-05
803.95	1.35e-05			803.95	7e-07			803.95	1.44e-05			803.95	1.31e-05			803.95	-0.0010974			803.95	1.76e-05			803.95	1.22e-05			803.95	-0.0002045			803.95	0.0052491			803.95	1.19e-05
804.95	1.35e-05			804.95	9e-07			804.95	1.43e-05			804.95	1.3e-05			804.95	-0.0010929			804.95	1.75e-05			804.95	1.22e-05			804.95	-0.0002119			804.95	0.0052282			804.95	1.19e-05
805.95	1.35e-05			805.95	1e-06			805.95	1.43e-05			805.95	1.3e-05			805.95	-0.0010881			805.95	1.75e-05			805.95	1.22e-05			805.95	-0.0002191			805.95	0.0052079			805.95	1.19e-05
806.95	1.34e-05			806.95	1.2e-06			806.95	1.43e-05			806.95	1.3e-05			806.95	-0.0010828			806.95	1.74e-05			806.95	1.22e-05			806.95	-0.0002262			806.95	0.0051883			806.95	1.18e-05
807.95	1.34e-05			807.95	1.3e-06			807.95	1.42e-05			807.95	1.3e-05			807.95	-0.0010772			807.95	1.74e-05			807.95	1.21e-05			807.95	-0.0002332			807.95	0.0051695			807.95	1.18e-05
808.95	1.34e-05			808.95	1.4e-06			808.95	1.42e-05			808.95	1.29e-05			808.95	-0.0010713			808.95	1.73e-05			808.95	1.21e-05			808.95	-0.0002399			808.95	0.0051516			808.95	1.18e-05
809.95	1.33e-05			809.95	1.6e-06			809.95	1.42e-05			809.95	1.29e-05			809.95	-0.001065			809.95	1.73e-05			809.95	1.21e-05			809.95	-0.0002465			809.95	0.0051344			809.95	1.18e-05
810.95	1.33e-05			810.95	1.7e-06			810.95	1.41e-05			810.95	1.29e-05			810.95	-0.0010585			810.95	1.72e-05			810.95	1.21e-05			810.95	-0.000253			810.95	0.0051181			810.95	1.17e-05
811.95	1.33e-05			811.95	1.9e-06			811.95	1.41e-05			811.95	1.28e-05			811.95	-0.0010517			811.95	1.72e-05			811.95	1.2e-05			811.95	-0.0002592			811.95	0.0051025			811.95	1.17e-05
812.95	1.32e-05			812.95	2e-06			812.95	1.41e-05			812.95	1.28e-05			812.95	-0.0010447			812.95	1.71e-05			812.95	1.2e-05			812.95	-0.0002653			812.95	0.0050877			812.95	1.17e-05
813.95	1.32e-05			813.95	2.2e-06			813.95	1.4e-05			813.95	1.28e-05			813.95	-0.0010375			813.95	1.71e-05			813.95	1.2e-05			813.95	-0.0002712			813.95	0.0050736			813.95	1.17e-05
814.95	1.32e-05			814.95	2.3e-06			814.95	1.4e-05			814.95	1.27e-05			814.95	-0.0010301			814.95	1.7e-05			814.95	1.2e-05			814.95	-0.0002769			814.95	0.0050602			814.95	1.16e-05
815.95	1.31e-05			815.95	2.4e-06			815.95	1.4e-05			815.95	1.27e-05			815.95	-0.0010225			815.95	1.7e-05			815.95	1.19e-05			815.95	-0.0002824			815.95	0.0050474			815.95	1.16e-05
816.95	1.31e-05			816.95	2.6e-06			816.95	1.39e-05			816.95	1.27e-05			816.95	-0.0010148			816.95	1.69e-05			816.95	1.19e-05			816.95	-0.0002876			816.95	0.0050352			816.95	1.16e-05
817.95	1.31e-05			817.95	2.7e-06			817.95	1.39e-05			817.95	1.27e-05			817.95	-0.0010069			817.95	1.69e-05			817.95	1.19e-05			817.95	-0.0002927			817.95	0.0050237			817.95	1.16e-05
818.95	1.31e-05			818.95	2.9e-06			818.95	1.39e-05			818.95	1.26e-05			818.95	-0.000999			818.95	1.68e-05			818.95	1.19e-05			818.95	-0.0002976			818.95	0.0050127			818.95	1.15e-05
819.95	1.3e-05			819.95	3e-06			819.95	1.38e-05			819.95	1.26e-05			819.95	-0.0009909			819.95	1.68e-05			819.95	1.18e-05			819.95	-0.0003022			819.95	0.0050023			819.95	1.15e-05
820.95	1.3e-05			820.95	3.2e-06			820.95	1.38e-05			820.95	1.26e-05			820.95	-0.0009828			820.95	1.67e-05			820.95	1.18e-05			820.95	-0.0003067			820.95	0.0049924			820.95	1.15e-05
821.95	1.3e-05			821.95	3.3e-06			821.95	1.38e-05			821.95	1.25e-05			821.95	-0.0009746			821.95	1.67e-05			821.95	1.18e-05			821.95	-0.0003109			821.95	0.004983			821.95	1.15e-05
822.95	1.29e-05			822.95	3.5e-06			822.95	1.37e-05			822.95	1.25e-05			822.95	-0.0009663			822.95	1.66e-05			822.95	1.18e-05			822.95	-0.0003149			822.95	0.004974			822.95	1.15e-05
823.95	1.29e-05			823.95	3.6e-06			823.95	1.37e-05			823.95	1.25e-05			823.95	-0.0009579			823.95	1.66e-05			823.95	1.17e-05			823.95	-0.0003187			823.95	0.0049654			823.95	1.14e-05
824.95	1.29e-05			824.95	3.8e-06			824.95	1.37e-05			824.95	1.25e-05			824.95	-0.0009495			824.95	1.66e-05			824.95	1.17e-05			824.95	-0.0003223			824.95	0.0049572			824.95	1.14e-05
825.95	1.28e-05			825.95	3.9e-06			825.95	1.36e-05			825.95	1.24e-05			825.95	-0.0009411			825.95	1.65e-05			825.95	1.17e-05			825.95	-0.0003257			825.95	0.0049494			825.95	1.14e-05
826.95	1.28e-05			826.95	4e-06			826.95	1.36e-05			826.95	1.24e-05			826.95	-0.0009327			826.95	1.65e-05			826.95	1.17e-05			826.95	-0.0003289			826.95	0.004942			826.95	1.14e-05
827.95	1.28e-05			827.95	4.2e-06			827.95	1.36e-05			827.95	1.24e-05			827.95	-0.0009242			827.95	1.64e-05			827.95	1.16e-05			827.95	-0.0003318			827.95	0.004935			827.95	1.13e-05
828.95	1.28e-05			828.95	4.3e-06			828.95	1.35e-05			828.95	1.24e-05			828.95	-0.0009157			828.95	1.64e-05			828.95	1.16e-05			828.95	-0.0003345			828.95	0.0049284			828.95	1.13e-05
829.95	1.27e-05			829.95	4.5e-06			829.95	1.35e-05			829.95	1.23e-05			829.95	-0.0009072			829.95	1.63e-05			829.95	1.16e-05			829.95	-0.0003371			829.95	0.0049221			829.95	1.13e-05
830.95	1.27e-05			830.95	4.6e-06			830.95	1.35e-05			830.95	1.23e-05			830.95	-0.0008986			830.95	1.63e-05			830.95	1.16e-05			830.95	-0.0003394			830.95	0.0049162			830.95	1.13e-05
831.95	1.27e-05			831.95	4.8e-06			831.95	1.34e-05			831.95	1.23e-05			831.95	-0.0008901			831.95	1.62e-05			831.95	1.15e-05			831.95	-0.0003415			831.95	0.0049106			831.95	1.12e-05
832.95	1.26e-05			832.95	4.9e-06			832.95	1.34e-05			832.95	1.22e-05			832.95	-0.0008816			832.95	1.62e-05			832.95	1.15e-05			832.95	-0.0003434			832.95	0.0049052			832.95	1.12e-05
833.95	1.26e-05			833.95	5.1e-06			833.95	1.34e-05			833.95	1.22e-05			833.95	-0.0008731			833.95	1.62e-05			833.95	1.15e-05			833.95	-0.0003451			833.95	0.0049			833.95	1.12e-05
834.95	1.26e-05			834.95	5.2e-06			834.95	1.33e-05			834.95	1.22e-05			834.95	-0.0008645			834.95	1.61e-05			834.95	1.15e-05			834.95	-0.0003466			834.95	0.0048951			834.95	1.12e-05
835.95	1.25e-05			835.95	5.4e-06			835.95	1.33e-05			835.95	1.22e-05			835.95	-0.000856			835.95	1.61e-05			835.95	1.14e-05			835.95	-0.0003479			835.95	0.0048904			835.95	1.12e-05
836.95	1.25e-05			836.95	5.5e-06			836.95	1.33e-05			836.95	1.21e-05			836.95	-0.0008475			836.95	1.6e-05			836.95	1.14e-05			836.95	-0.000349			836.95	0.004886			836.95	1.11e-05
837.95	1.25e-05			837.95	5.7e-06			837.95	1.32e-05			837.95	1.21e-05			837.95	-0.0008391			837.95	1.6e-05			837.95	1.14e-05			837.95	-0.00035			837.95	0.0048818			837.95	1.11e-05
838.95	1.25e-05			838.95	5.8e-06			838.95	1.32e-05			838.95	1.21e-05			838.95	-0.0008306			838.95	1.59e-05			838.95	1.14e-05			838.95	-0.0003507			838.95	0.0048778			838.95	1.11e-05
839.95	1.24e-05			839.95	6e-06			839.95	1.32e-05			839.95	1.21e-05			839.95	-0.0008221			839.95	1.59e-05			839.95	1.14e-05			839.95	-0.0003513			839.95	0.0048741			839.95	1.11e-05
840.95	1.24e-05			840.95	6.1e-06			840.95	1.31e-05			840.95	1.2e-05			840.95	-0.0008137			840.95	1.58e-05			840.95	1.13e-05			840.95	-0.0003517			840.95	0.0048706			840.95	1.11e-05
841.95	1.24e-05			841.95	6.3e-06			841.95	1.31e-05			841.95	1.2e-05			841.95	-0.0008053			841.95	1.58e-05			841.95	1.13e-05			841.95	-0.0003519			841.95	0.0048673			841.95	1.1e-05
842.95	1.24e-05			842.95	6.4e-06			842.95	1.31e-05			842.95	1.2e-05			842.95	-0.0007969			842.95	1.58e-05			842.95	1.13e-05			842.95	-0.000352			842.95	0.0048643			842.95	1.1e-05
843.95	1.23e-05			843.95	6.6e-06			843.95	1.31e-05			843.95	1.19e-05			843.95	-0.0007885			843.95	1.57e-05			843.95	1.13e-05			843.95	-0.0003518			843.95	0.0048615			843.95	1.1e-05
844.95	1.23e-05			844.95	6.7e-06			844.95	1.3e-05			844.95	1.19e-05			844.95	-0.0007801			844.95	1.57e-05			844.95	1.12e-05			844.95	-0.0003516			844.95	0.0048588			844.95	1.1e-05
845.95	1.23e-05			845.95	6.9e-06			845.95	1.3e-05			845.95	1.19e-05			845.95	-0.0007718			845.95	1.56e-05			845.95	1.12e-05			845.95	-0.0003512			845.95	0.0048562			845.95	1.09e-05
846.95	1.22e-05			846.95	7e-06			846.95	1.3e-05			846.95	1.19e-05			846.95	-0.0007634			846.95	1.56e-05			846.95	1.12e-05			846.95	-0.0003506			846.95	0.0048537			846.95	1.09e-05
847.95	1.22e-05			847.95	7.2e-06			847.95	1.29e-05			847.95	1.18e-05			847.95	-0.0007551			847.95	1.56e-05			847.95	1.12e-05			847.95	-0.0003499			847.95	0.0048514			847.95	1.09e-05
848.95	1.22e-05			848.95	7.3e-06			848.95	1.29e-05			848.95	1.18e-05			848.95	-0.0007468			848.95	1.55e-05			848.95	1.12e-05			848.95	-0.000349			848.95	0.0048492			848.95	1.09e-05
849.95	1.22e-05			849.95	7.5e-06			849.95	1.29e-05			849.95	1.18e-05			849.95	-0.0007386			849.95	1.55e-05			849.95	1.11e-05			849.95	-0.000348			849.95	0.0048471			849.95	1.09e-05
850.95	1.21e-05			850.95	7.6e-06			850.95	1.28e-05			850.95	1.18e-05			850.95	-0.0007303			850.95	1.54e-05			850.95	1.11e-05			850.95	-0.0003469			850.95	0.0048451			850.95	1.08e-05
851.95	1.21e-05			851.95	7.8e-06			851.95	1.28e-05			851.95	1.17e-05			851.95	-0.0007221			851.95	1.54e-05			851.95	1.11e-05			851.95	-0.0003456			851.95	0.0048432			851.95	1.08e-05
852.95	1.21e-05			852.95	7.9e-06			852.95	1.28e-05			852.95	1.17e-05			852.95	-0.0007139			852.95	1.53e-05			852.95	1.11e-05			852.95	-0.0003442			852.95	0.0048413			852.95	1.08e-05
853.95	1.21e-05			853.95	8.1e-06			853.95	1.28e-05			853.95	1.17e-05			853.95	-0.0007056			853.95	1.53e-05			853.95	1.1e-05			853.95	-0.0003427			853.95	0.0048396			853.95	1.08e-05
854.95	1.2e-05			854.95	8.2e-06			854.95	1.27e-05			854.95	1.17e-05			854.95	-0.0006975			854.95	1.53e-05			854.95	1.1e-05			854.95	-0.000341			854.95	0.0048379			854.95	1.08e-05
855.95	1.2e-05			855.95	8.4e-06			855.95	1.27e-05			855.95	1.16e-05			855.95	-0.0006893			855.95	1.52e-05			855.95	1.1e-05			855.95	-0.0003392			855.95	0.0048365			855.95	1.07e-05
856.95	1.2e-05			856.95	8.5e-06			856.95	1.27e-05			856.95	1.16e-05			856.95	-0.0006811			856.95	1.52e-05			856.95	1.1e-05			856.95	-0.0003374			856.95	0.0048352			856.95	1.07e-05
857.95	1.19e-05			857.95	8.7e-06			857.95	1.26e-05			857.95	1.16e-05			857.95	-0.000673			857.95	1.51e-05			857.95	1.1e-05			857.95	-0.0003354			857.95	0.0048341			857.95	1.07e-05
858.95	1.19e-05			858.95	8.9e-06			858.95	1.26e-05			858.95	1.16e-05			858.95	-0.0006649			858.95	1.51e-05			858.95	1.09e-05			858.95	-0.0003333			858.95	0.0048332			858.95	1.07e-05
859.95	1.19e-05			859.95	9e-06			859.95	1.26e-05			859.95	1.15e-05			859.95	-0.0006568			859.95	1.51e-05			859.95	1.09e-05			859.95	-0.0003311			859.95	0.0048325			859.95	1.07e-05
860.95	1.19e-05			860.95	9.2e-06			860.95	1.26e-05			860.95	1.15e-05			860.95	-0.0006487			860.95	1.5e-05			860.95	1.09e-05			860.95	-0.0003288			860.95	0.004832			860.95	1.06e-05
861.95	1.18e-05			861.95	9.3e-06			861.95	1.25e-05			861.95	1.15e-05			861.95	-0.0006406			861.95	1.5e-05			861.95	1.09e-05			861.95	-0.0003263			861.95	0.0048317			861.95	1.06e-05
862.95	1.18e-05			862.95	9.5e-06			862.95	1.25e-05			862.95	1.15e-05			862.95	-0.0006325			862.95	1.5e-05			862.95	1.08e-05			862.95	-0.0003238			862.95	0.0048315			862.95	1.06e-05
863.95	1.18e-05			863.95	9.6e-06			863.95	1.25e-05			863.95	1.15e-05			863.95	-0.0006245			863.95	1.49e-05			863.95	1.08e-05			863.95	-0.0003212			863.95	0.0048315			863.95	1.06e-05
864.95	1.18e-05			864.95	9.8e-06			864.95	1.24e-05			864.95	1.14e-05			864.95	-0.0006164			864.95	1.49e-05			864.95	1.08e-05			864.95	-0.0003185			864.95	0.0048314			864.95	1.06e-05
865.95	1.17e-05			865.95	9.9e-06			865.95	1.24e-05			865.95	1.14e-05			865.95	-0.0006084			865.95	1.48e-05			865.95	1.08e-05			865.95	-0.0003158			865.95	0.0048314			865.95	1.05e-05
866.95	1.17e-05			866.95	1.01e-05			866.95	1.24e-05			866.95	1.14e-05			866.95	-0.0006003			866.95	1.48e-05			866.95	1.08e-05			866.95	-0.0003129			866.95	0.0048314			866.95	1.05e-05
867.95	1.17e-05			867.95	1.02e-05			867.95	1.24e-05			867.95	1.14e-05			867.95	-0.0005923			867.95	1.48e-05			867.95	1.07e-05			867.95	-0.0003099			867.95	0.0048314			867.95	1.05e-05
868.95	1.17e-05			868.95	1.03e-05			868.95	1.23e-05			868.95	1.13e-05			868.95	-0.0005843			868.95	1.47e-05			868.95	1.07e-05			868.95	-0.0003069			868.95	0.0048313			868.95	1.05e-05
869.95	1.16e-05			869.95	1.05e-05			869.95	1.23e-05			869.95	1.13e-05			869.95	-0.0005763			869.95	1.47e-05			869.95	1.07e-05			869.95	-0.0003037			869.95	0.0048312			869.95	1.05e-05
870.95	1.16e-05			870.95	1.06e-05			870.95	1.23e-05			870.95	1.13e-05			870.95	-0.0005683			870.95	1.46e-05			870.95	1.07e-05			870.95	-0.0003005			870.95	0.0048312			870.95	1.04e-05
871.95	1.16e-05			871.95	1.08e-05			871.95	1.22e-05			871.95	1.13e-05			871.95	-0.0005603			871.95	1.46e-05			871.95	1.07e-05			871.95	-0.0002972			871.95	0.0048311			871.95	1.04e-05
872.95	1.16e-05			872.95	1.09e-05			872.95	1.22e-05			872.95	1.12e-05			872.95	-0.0005524			872.95	1.46e-05			872.95	1.06e-05			872.95	-0.0002939			872.95	0.0048311			872.95	1.04e-05
873.95	1.15e-05			873.95	1.11e-05			873.95	1.22e-05			873.95	1.12e-05			873.95	-0.0005444			873.95	1.45e-05			873.95	1.06e-05			873.95	-0.0002904			873.95	0.0048311			873.95	1.04e-05
874.95	1.15e-05			874.95	1.12e-05			874.95	1.22e-05			874.95	1.12e-05			874.95	-0.0005364			874.95	1.45e-05			874.95	1.06e-05			874.95	-0.0002869			874.95	0.0048311			874.95	1.04e-05
875.95	1.15e-05			875.95	1.13e-05			875.95	1.21e-05			875.95	1.12e-05			875.95	-0.0005285			875.95	1.45e-05			875.95	1.06e-05			875.95	-0.0002833			875.95	0.004831			875.95	1.03e-05
876.95	1.15e-05			876.95	1.15e-05			876.95	1.21e-05			876.95	1.11e-05			876.95	-0.0005205			876.95	1.44e-05			876.95	1.06e-05			876.95	-0.0002796			876.95	0.004831			876.95	1.03e-05
877.95	1.14e-05			877.95	1.16e-05			877.95	1.21e-05			877.95	1.11e-05			877.95	-0.0005126			877.95	1.44e-05			877.95	1.05e-05			877.95	-0.0002759			877.95	0.0048309			877.95	1.03e-05
878.95	1.14e-05			878.95	1.18e-05			878.95	1.21e-05			878.95	1.11e-05			878.95	-0.0005046			878.95	1.44e-05			878.95	1.05e-05			878.95	-0.0002721			878.95	0.0048308			878.95	1.03e-05
879.95	1.14e-05			879.95	1.19e-05			879.95	1.2e-05			879.95	1.11e-05			879.95	-0.0004967			879.95	1.43e-05			879.95	1.05e-05			879.95	-0.0002682			879.95	0.0048306			879.95	1.03e-05
880.95	1.14e-05			880.95	1.2e-05			880.95	1.2e-05			880.95	1.11e-05			880.95	-0.0004887			880.95	1.43e-05			880.95	1.05e-05			880.95	-0.0002642			880.95	0.0048305			880.95	1.03e-05
881.95	1.13e-05			881.95	1.21e-05			881.95	1.2e-05			881.95	1.1e-05			881.95	-0.0004808			881.95	1.42e-05			881.95	1.05e-05			881.95	-0.0002602			881.95	0.0048304			881.95	1.02e-05
882.95	1.13e-05			882.95	1.23e-05			882.95	1.2e-05			882.95	1.1e-05			882.95	-0.0004728			882.95	1.42e-05			882.95	1.04e-05			882.95	-0.0002561			882.95	0.0048303			882.95	1.02e-05
883.95	1.13e-05			883.95	1.24e-05			883.95	1.19e-05			883.95	1.1e-05			883.95	-0.0004649			883.95	1.42e-05			883.95	1.04e-05			883.95	-0.000252			883.95	0.0048301			883.95	1.02e-05
884.95	1.13e-05			884.95	1.25e-05			884.95	1.19e-05			884.95	1.1e-05			884.95	-0.0004569			884.95	1.41e-05			884.95	1.04e-05			884.95	-0.0002478			884.95	0.0048298			884.95	1.02e-05
885.95	1.13e-05			885.95	1.27e-05			885.95	1.19e-05			885.95	1.09e-05			885.95	-0.0004489			885.95	1.41e-05			885.95	1.04e-05			885.95	-0.0002435			885.95	0.0048293			885.95	1.02e-05
886.95	1.12e-05			886.95	1.28e-05			886.95	1.18e-05			886.95	1.09e-05			886.95	-0.000441			886.95	1.41e-05			886.95	1.04e-05			886.95	-0.0002391			886.95	0.0048288			886.95	1.01e-05
887.95	1.12e-05			887.95	1.29e-05			887.95	1.18e-05			887.95	1.09e-05			887.95	-0.000433			887.95	1.4e-05			887.95	1.03e-05			887.95	-0.0002347			887.95	0.0048281			887.95	1.01e-05
888.95	1.12e-05			888.95	1.3e-05			888.95	1.18e-05			888.95	1.09e-05			888.95	-0.000425			888.95	1.4e-05			888.95	1.03e-05			888.95	-0.0002302			888.95	0.0048272			888.95	1.01e-05
889.95	1.12e-05			889.95	1.31e-05			889.95	1.18e-05			889.95	1.09e-05			889.95	-0.000417			889.95	1.4e-05			889.95	1.03e-05			889.95	-0.0002257			889.95	0.0048264			889.95	1.01e-05
890.95	1.11e-05			890.95	1.32e-05			890.95	1.17e-05			890.95	1.08e-05			890.95	-0.000409			890.95	1.39e-05			890.95	1.03e-05			890.95	-0.0002211			890.95	0.0048254			890.95	1.01e-05
891.95	1.11e-05			891.95	1.33e-05			891.95	1.17e-05			891.95	1.08e-05			891.95	-0.000401			891.95	1.39e-05			891.95	1.03e-05			891.95	-0.0002164			891.95	0.0048245			891.95	1.01e-05
892.95	1.11e-05			892.95	1.35e-05			892.95	1.17e-05			892.95	1.08e-05			892.95	-0.000393			892.95	1.39e-05			892.95	1.03e-05			892.95	-0.0002117			892.95	0.0048235			892.95	1e-05
893.95	1.11e-05			893.95	1.36e-05			893.95	1.17e-05			893.95	1.08e-05			893.95	-0.0003849			893.95	1.38e-05			893.95	1.02e-05			893.95	-0.0002069			893.95	0.0048225			893.95	1e-05
894.95	1.1e-05			894.95	1.37e-05			894.95	1.16e-05			894.95	1.08e-05			894.95	-0.0003769			894.95	1.38e-05			894.95	1.02e-05			894.95	-0.000202			894.95	0.0048215			894.95	1e-05
895.95	1.1e-05			895.95	1.38e-05			895.95	1.16e-05			895.95	1.07e-05			895.95	-0.0003688			895.95	1.38e-05			895.95	1.02e-05			895.95	-0.0001971			895.95	0.0048205			895.95	1e-05
896.95	1.1e-05			896.95	1.39e-05			896.95	1.16e-05			896.95	1.07e-05			896.95	-0.0003607			896.95	1.37e-05			896.95	1.02e-05			896.95	-0.0001921			896.95	0.0048196			896.95	1e-05
897.95	1.1e-05			897.95	1.4e-05			897.95	1.16e-05			897.95	1.07e-05			897.95	-0.0003526			897.95	1.37e-05			897.95	1.02e-05			897.95	-0.0001871			897.95	0.0048188			897.95	9.9e-06
898.95	1.1e-05			898.95	1.41e-05			898.95	1.16e-05			898.95	1.07e-05			898.95	-0.0003444			898.95	1.37e-05			898.95	1.01e-05			898.95	-0.000182			898.95	0.0048181			898.95	9.9e-06
[truncated: 101 more rows]
